# Supplementary material for: One Size Fits All—Venomics of the Iberian Adder (Vipera seoanei, Lataste 1878) Reveals Low Levels of Venom Variation across Its Distributional Range
Source: MDPI journal article supplement (doi:10.3390/toxins15060371), 2023-06-01
Supplement: s1 [file s1]

**Figure S3. The five geographically structured colour phenotypes currently recognised within *V. seoanei*.**

Viper pictures modified from [48].

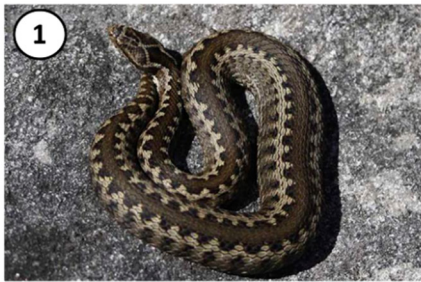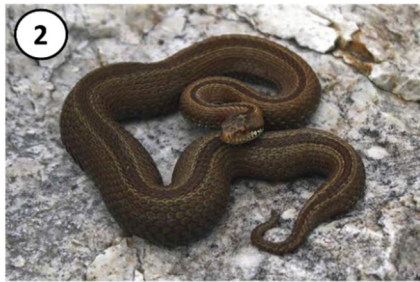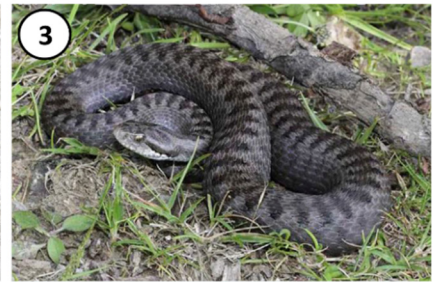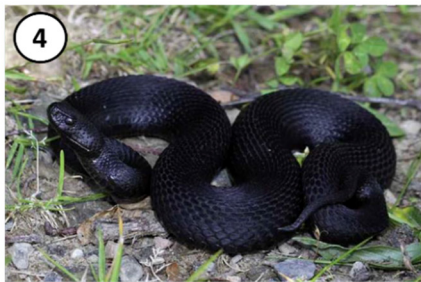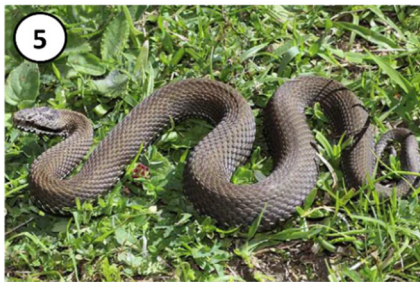

**Colour phenotype**

1. *classic*
2. *bilineata*
3. *cantabrica*
4. *melanistic*
5. *uniform*
