# Supplementary material for: One Size Fits All—Venomics of the Iberian Adder (Vipera seoanei, Lataste 1878) Reveals Low Levels of Venom Variation across Its Distributional Range
Source: MDPI journal article supplement (doi:10.3390/toxins15060371), 2023-06-01
Supplement: s1 [file s1]

Archive with 5 entries (5 files):
- Figure S1.pdf
- Figure S2.pdf
- Figure S3.pdf
- Figure S4.pdf
- Supplementary Tables.xlsx
