# Supplementary material for: One Size Fits All—Venomics of the Iberian Adder (Vipera seoanei, Lataste 1878) Reveals Low Levels of Venom Variation across Its Distributional Range
Source: MDPI journal article supplement (doi:10.3390/toxins15060371), 2023-06-01

## Figure S4. Geographic genetic variation in *V. seoanei*.

First (a) and second (b) components of the Spatial Principal Component Analysis performed on the calculated genetic distances. Sampling localities are reported.

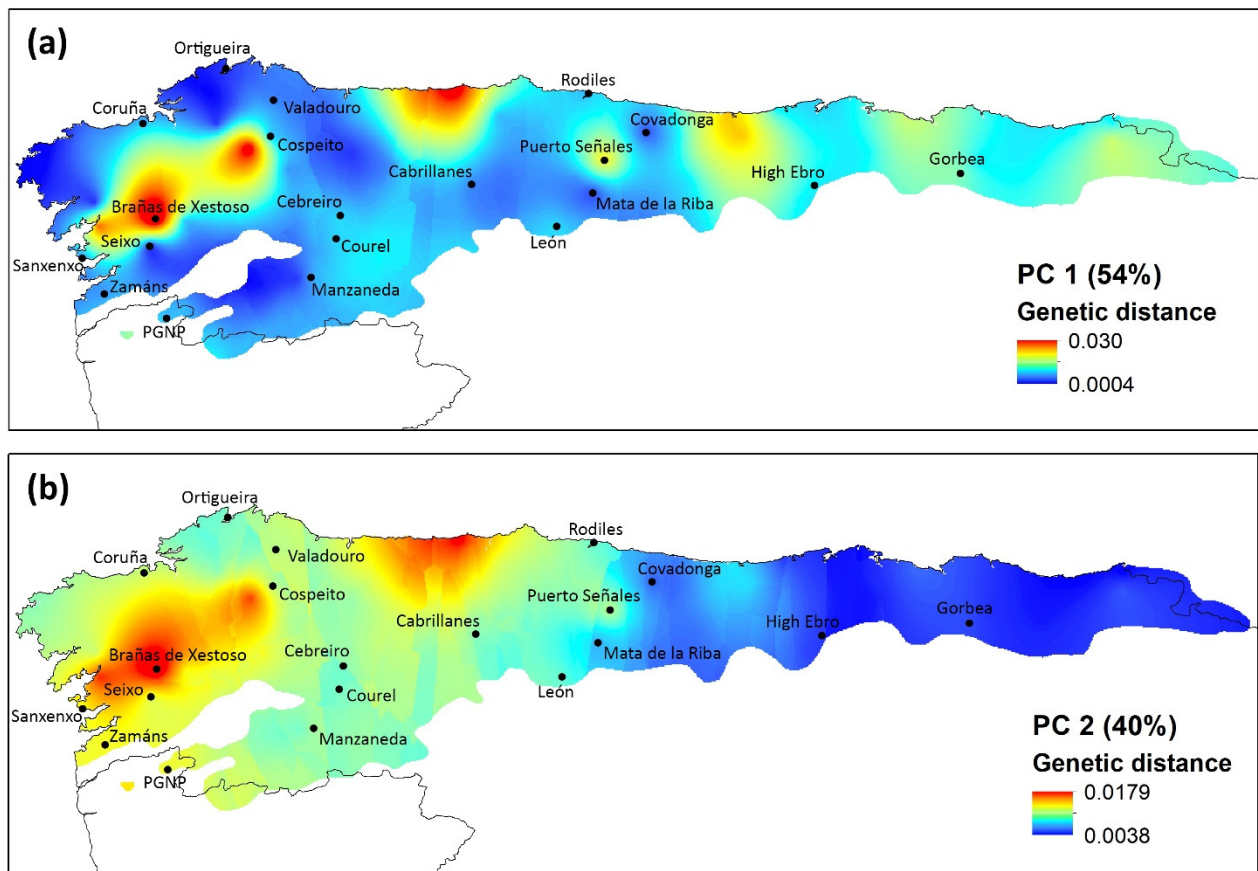

Supplement: s1 [file s1 › Figure S4.pdf]
