# Supplementary material for: One Size Fits All—Venomics of the Iberian Adder (Vipera seoanei, Lataste 1878) Reveals Low Levels of Venom Variation across Its Distributional Range
Source: MDPI journal article supplement (doi:10.3390/toxins15060371), 2023-06-01
Supplement: s1 [file s1 › Supplementary Tables.xlsx]

## Sheet: Content index
INDEX
Table S1	Quantification of the V. seoanei venom pool proteome.
Table S2	MS bottom-up annotation of the peptides detected in the V. seoanei venom pool analysed.
Table S3	Final binary matrix of the 10 polymorphic bands considered for statistical testing.
Table S4	Results of the single predictor binomial GLMs performed.
Table S5	List of the V. seoanei specimens considered in the present work.
Table S6	List of the 65 V. seoanei specimens considered to produce the matrix of uncorrected p-distances estimated for cyt b and ND4 sequences.

## Sheet: Table S1
			Supplementary Table S1. Quantification of the V. seoanei venom pool proteome. Fraction numbers are based on the RP-HPLC chromatogram. Band IDs are based on the SDS-PAGE profile in Figure 1.
	INDEX						QUANTIFICATION									MS IDENTIFIED PEPTIDES								BU MS ANNOTATION
	Table S1							HPLC		SDS PAGE
	Table S2		HPLC peak	SDS-PAGE band	Molecular mass in kDa (PAGE-based)	Toxin family	Band %	Peak INT	Peak %	Area	IntDensity	blank_area	blank_intdent	control	real	main peak mass (in m/z with z=1)	main peptide	further masses and peptides						annotation note	file name, if different to band ID
	Table S3		1		-	peptides	0.00130996	990.1	0.00130996							484.2	240.09-PE							-	01_pep
	Table S4		2		-	peptides	0.000772534	583.9	0.000772534							355.26	240.09-P							-	02_pep
	Table S5		3		-	peptides	0.000357887	270.5	0.000357887							482.27	211.11-RP	428.21	225.12-QG					-	03_pep
	Table S6		4		-	peptides	0.00203632	1539.1	0.00203632							547.22	GGGGGGW	607.26	394.145-PP	651.29	439.18-PP	460.22	EK-202.04	-	04_pep
			5		-	peptides	0.00322231	2435.5	0.00322231							814.35	pERGGGGGGW	457.11	-					-	05_pep
			6	6a	10	svMP-i	0.0499806	37776.6	0.0499806							444.22	pEKW	448.22	pEK-208.084 / QK-190.075	867.446				-	06_pep; 06a07a
			7	7a	10	svMP-i	0.02208	16688.6	0.02208							472.23	pERW	476.22	pER-208.084 / QR-190.075	867.446; 2614.2				-	07_pep; 06a07a
			8	8a	10	peptides	0.00169444	1280.7	0.00169444							1072.58	pERRPPEIPP			2191.1; 2880.3; 3672.618				-	08_pep; 08a09a
			9	9a	10	svMP-i	0.00719228	5436.1	0.00719228							430.17	pENW	1072.58	pERRPPEIPP					-	09_pep; 08a09a
			10	10a	10	peptides	0.0148144	11197.1	0.0148144							851.45	pERWPGPK	1072.58	pERRPPEIPP					-	10_pep; 10a
			11	11a	10	KUN	0.00122952	929.3	0.00122952															-	-
			12	12a	10	KUN	0.00727841	5501.2	0.00727841															-	-
			13	13a	10	KUN	0.000957894	724	0.000957894															MS man. comp. to 12a	-
			14					3050.7	0.00403625
				14a	12	DI	0.00174021			4292	78575	1967	19057	36992.6	0.431145									-	-
				14b	10	KUN	0.00229604			5520	102288	1967	19057	48808.3	0.568855									MS man. comp. to 12a	-
														85800.8	1
			15					17997.5	0.0238117
				15a	12	DI	0.0177249			7956	437590	1836	19382	353601	0.744376									-	-
				15b	<8	NP	0.00608685			9126	217769	1836	19382	121429	0.255624									-	-
														475030	1
			16					3987.5	0.00527569
				16a	12	DI	0.00423367			8806	640322	1605	17452	544570	0.802486									-	-
				16b	<8	NP	0.00104203			8120	222327	1605	17452	134034	0.197514									-	-
														678604	1
			17					15311.2	0.0202576
				17a	12	DI	0.0169612			9660	586975	1248	13227	484593	0.837273									-	-
				17b	<8	NP	0.00329645			8664	186008	1248	13227	94182.1	0.162727									MS man. comp. to 16b	-
														578775	1
			18					6752.2	0.00893355
				18a	12	DI	0.00893355			1	2	1	1	1	1									-	-
														1	1
			19					14894.4	0.0197062
				19a	12	DI	0.0197062			1	2	1	1	1	1									-	-
														1	1
			20					17964.6	0.0237682
				20a	12	DI	0.0237682			1	2	1	1	1	1									-	-
														1	1
			21					8743.2	0.0115678
				21a	15	VEGF	0.000503136			3535	42837	990	9406	9250.93	0.0434947									-	21a22a23b
				21b	12	DI	0.0110646			8874	287752	990	9406	203440	0.956505									-	-
														212691	1
			22					8848.9	0.0117076
				22a	15	VEGF	0.000720344			3570	58735	940	8310	27174.7	0.0615278									-	21a22a23b
				22b	13	DI	0.00352749			3672	165535	940	8310	133073	0.301299									-	-
				22c	11	DI	0.00745978			6180	336051	940	8310	281417	0.637174									-	-
														441665	1
			23					10717.6	0.01418
				23a	25	NA	0.000250168			4173	48122	1352	11689	12043.5	0.0176423									-	-
				23b	15	VEGF	0.00136463			3335	94529	1352	11689	65695.6	0.0962365									-	21a22a23b
				23c	13	DI	0.0036351			3850	208285	1352	11689	174999	0.256354									MS man. comp. to 24b	-
				23d	11	DI	0.00893011			7085	491164	1352	11689	429909	0.629768									-	-
														682647	1
			24					9805.3	0.012973
				24a	14	VEGF	0.00258726			4872	313378	1188	11549	266015	0.199435									-	-
				24b	12	DI	0.00972415			10368	1100602	1188	11549	999811	0.749569									most DI	-
				24c	9	DI	0.000661568			5160	118183	1188	11549	68020.7	0.0509959									MS man. comp. to 24b	24c25c
														1.33385e+06	1
			25					7665.5	0.0101419
				25a	14	VEGF	0.00339374			6042	515468	1200	12033	454882	0.334625										-
				25b	12	DI	0.00634191			8733	937613	1200	12033	850043	0.625318									most DI	-
				25c	9	DI	0.000406255			3648	91033	1200	12033	54452.7	0.0400571									-	24c25c
														1.35938e+06	1
			26					37694.4	0.0498719
				26a	28	PLA2	0.00311867			5328	190693	1040	9968	139626	0.0625337									-	-
				26b	14	PLA2	0.0360987			14807	1758095	1040	9968	1.61618e+06	0.723828									most pla2	-
				26c	12	VEGF	0.0106545			5047	525388	1040	9968	477014	0.213638									most vegf	-
														2.23282e+06	1
			27					9198.4	0.01217
				27a	28	svMP	0.000524618			3900	115228	880	9024	75235.3	0.0431074									MS man. comp. to 29b	-
				27b	20	svMP	0.000538921			3400	112152	880	9024	77286.5	0.0442827									-	-
				27c	14	PLA2	0.00307317			4134	483115	880	9024	440723	0.25252									most pla2	-
				27d	13	VEGF	0.00414867			4773	643905	880	9024	594960	0.340893									most VEGF	-
				27e	12	VEGF	0.00388464			6095	619596	880	9024	557095	0.319197									-	-
														1.7453e+06	1
			28					7810.9	0.0103343
				28a	32	svMP	0.0001464			4950	73261	747	7165	25782.1	0.0141664									-	28a29a
				28b	28	svMP	0.000668264			4223	158192	747	7165	117686	0.0646648									MS man. comp. to 29b	-
				28c	20	svMP	0.00362476			6780	703379	747	7165	638347	0.350751									-	-
				28d	18	svMP	0.000391573			3850	105887	747	7165	68959	0.0378907									MS man. comp. to 28c	28d29d
				28e	14	PLA2	0.000668564			2550	142198	747	7165	117739	0.0646938									MS man. comp. to 27c	28e29e
				28f	13	VEGF	0.0033774			5650	648978	747	7165	594785	0.326815									-	-
				28g	12	VEGF	0.00145732			3030	285708	747	7165	256645	0.141018									-	-
														1.81994e+06	1
			29					8910	0.0117884
				29a	32	svMP	0.000139994			4653	66953	756	7001	23863.5	0.0118755									-	28a29a
				29b	28	svMP	0.00129289			5250	269005	756	7001	220387	0.109674									-
				29c	20	svMP	0.00455639			7597	847039	756	7001	776686	0.386513									-
				29d	18	svMP	0.000445589			3456	107960	756	7001	75955.4	0.0377988									-	28d29d
				29e	14	PLA2	0.000504077			2700	110929	756	7001	85925.4	0.0427603									-	28e29e
				29f	13	VEGF	0.00336187			5700	625852	756	7001	573067	0.285183									-	-
				29g	12	VEGF	0.00148764			3348	284589	756	7001	253585	0.126195									-	-
														2.00947e+06	1
			30					7054.8	0.00933391
				30a	28	svMP	0.00149201			4700	278459	729	7737	228577	0.159848									MS man. comp. to 29b	-
				30b	20	svMP	0.00293092			6283	515701	729	7737	449018	0.314007									-	-
				30c	14	PLA2	0.000364279			2525	82606	729	7737	55807.7	0.0390275									-	30c31d
				30d	13	VEGF	0.00323944			5452	554148	729	7737	496285	0.347062									-	-
				30e	12	VEGF	0.00130726			3456	236952	729	7737	200273	0.140055									-	-
														1.42996e+06	1
			31					4487.5	0.00593722
				31a	28	svMP	0.000710556			5406	190621	810	8457	134178	0.119678									MS man. comp. to 29b	-
				31b	25	svMP	0.00037222			2352	94845	810	8457	70288.4	0.0626926									MS man. comp. to 29b	-
				31c	20	svMP	0.000910832			4922	223387	810	8457	171998	0.15341									-	-
				31d	14	PLA2	0.000234944			2730	72869	810	8457	44365.8	0.0395713									-	30c31d
				31e	13	VEGF	0.00253459			5778	538948	810	8457	478621	0.426898									-	-
				31f	12	VEGF	0.00117408			3850	261905	810	8457	221708	0.197749									most VEGF	-
														1.12116e+06	1
			32					36901.3	0.0488226
				32a	25	PLA2	0.00204273			6048	140178	1001	10979	73843.3	0.0418399									-	-
				32b	17	NGF	0.00531418			4633	242919	1001	10979	192104	0.108847									-	-
				32c	13	PLA2	0.030326			10164	1207745	1001	10979	1.09627e+06	0.621148									-	-
				32d	11	VEGF	0.0111396			4337	450259	1001	10979	402691	0.228166									man(most abundant VEGF)	-
														1.7649e+06	1
			33					29799.8	0.0394269
				33a	70	NA	0.000534143			3392	58702	4576	44662	25595.9	0.0135477									-	-
				33b	55	NA	0.000494801			2970	52698	4576	44662	23710.6	0.0125498									-	-
				33c	25	PLA2	0.000901089			5096	97181	930	9855	43179.8	0.0228547									-	-
				33d	17	NGF	0.00242445			4922	168336	930	9855	116179	0.0614923									most NGF	-
				33e	13	PLA2	0.0241909			10492	1270400	930	9855	1.15922e+06	0.613564									-	-
				33f	11	PLA2	0.0108815			6138	586479	930	9855	521436	0.275991									MS man. comp. to 32d	-
														1.88932e+06	1
			34					1437.2	0.0019015
				34a	13	PLA2	0.0019015			6912	519922	1344	14478	445464	1									most pla2	-
														445464	1
			35					1640.8	0.00217087
				35a	25	CRISP	0.000663224			6741	208894	600	5541	146641	0.30551									-	-
				35b	15	PLA2	0.000126648			3105	56677	600	5541	28002.3	0.0583398									MS man. comp. to 35c	35b36d
				35c	14	PLA2	0.001381			7380	373498	600	5541	305344	0.63615									-	-
														479987	1
			36					21470	0.0284061
				36a	40	CRISP	0.00105317			4725	103691	1060	9756	60203.2	0.0370756									-	-
				36b	25	CRISP	0.0191089			11440	1197624	1060	9756	1.09233e+06	0.672705									-	-
				36c	17	CRISP	0.000741159			4469	83499	1060	9756	42367.3	0.0260916									-	-
				36d	15	PLA2	0.000758214			3120	72058	1060	9756	43342.2	0.026692									MS man. comp. to 35c	35b36d
				36e	14	PLA2	0.00674463			7168	451520	1060	9756	385547	0.237436									-	-
														1.62379e+06	1
			37					5243.2	0.00693706
				37a	25	CRISP	0.00348451			7700	675733	940	9833	595186	0.502304									-	-
				37b	13	PLA2	0.00345254			7750	670795	940	9833	589725	0.497696									-	-
														1.18491e+06	1
			38					1357.9	0.00179658
				38a	25	CRISP	0.000952175			7488	387052	828	8271	312253	0.529993									-	-
				38b	13	PLA2	0.000844405			6042	337266	828	8271	276912	0.470007									-	-
														589165	1
			39					6232.2	0.00824556
				39a	42	svSP	0.00015802			3978	51323	1010	9490	13945.6	0.0191643									MS man. comp. to 40b	-
				39b	35	svSP	0.000181787			3737	51156	1010	9490	16043	0.0220466									MS man. comp. to 40b	-
				39c	25	CRISP	0.000949125			6300	142957	1010	9490	83762	0.115107									-	-
				39d	13	PLA2	0.00695663			7800	687224	1010	9490	613935	0.843682									-	-
														727685	1
			40					47313.3	0.0625982
				40a	55	svMP	0.00177924			5562	142198	1410	13152	90317.6	0.0284232									MS man. comp. to 41d	-
				40b	42	svSP	0.00990795			5830	557326	1410	13152	502946	0.158278									-	-
				40c	35	svSP	0.012478			6840	697205	1410	13152	633404	0.199334									-	-
				40d	29	svSP	0.00135525			2808	94987	1410	13152	68794.9	0.02165									-	-
				40e	25	CRISP	0.00337702			6264	229852	1410	13152	171424	0.0539475									-	-
				40f	13	PLA2	0.0337008			15762	1857739	1410	13152	1.71072e+06	0.538367									-	-
														3.1776e+06	1
			41					26791	0.035446
				41a	120	svMP	0.000136899			2538	48486	672	10129	10230.9	0.00386217									MS man. comp. to 41d	-
				41b	100	svMP	0.000119616			3040	54761	672	10129	8939.33	0.00337459									MS man. comp. to 41d	-
				41c	70	svMP	2.6436e-05			2871	45250	672	10129	1975.66	0.000745809									MS man. comp. to 41d	-
				41d	55	svMP	0.00969809			9164	862902	672	10129	724774	0.273601									-	-
				41e	42	svSP	0.00517284			5616	471235	672	10129	386586	0.145936									-	-
				41f	35	svSP	0.00812533			7056	713590	672	10129	607236	0.229231									-	-
				41g	29	svSP	0.00134658			2800	142839	672	10129	100635	0.0379896									-	-
				41h	25	svSP	0.00106864			3330	130056	672	10129	79863.2	0.0301483									MS man. comp. to 41g	-
				41i	13	PLA2	0.00975162			9315	869178	672	10129	728774	0.275111									-	-
														2.64901e+06	1
			42					7319.1	0.00968359
				42a	55	svMP	0.00420577			6588	552291	665	6323	489651	0.434319									-	-
				42b	35	svSP	0.00270944			5029	363259	665	6323	315442	0.279796									-	-
				42c	28	LAAO	0.00216564			4815	297914	665	6323	252132	0.22364									-	-
				42d	13	PLA2	0.000602745			4752	115357	665	6323	70173.7	0.062244									-	-
														1.1274e+06	1
			43					25732.1	0.0340451
				43a	70	svSP	0.000151869			1900	27517	534	4811	10399.2	0.00446082									-	43a44a45a
				43b	55	svMP	0.00479364			4900	372390	534	4811	328244	0.140803									MS man. comp. to 42a	-
				43c	35	svSP	0.00928553			6780	696909	534	4811	635826	0.272742									-	-
				43d	30	svSP	0.00290721			2376	220477	534	4811	199071	0.0853929									-	-
				43e	28	LAAO	0.00635506			5439	484164	534	4811	435162	0.186666									most laao	-
				43f	20	svSP	0.00063998			3780	77878	534	4811	43822.6	0.018798									-	-
				43g	16	CTL	0.00152725			4982	149463	534	4811	104578	0.0448597									-	-
				43h	15	CTL	0.00838453			7680	643322	534	4811	574130	0.246277									-	-
														2.33123e+06	1
			44					36796.5	0.0486839
				44a	70	svSP	0.000144136			2231	29351	1196	11534	7835.65	0.00296064									-	43a44a45a
				44b	55	svMP	0.00227605			3978	162096	1196	11534	123733	0.0467516									-	44b45b
				44c	45	svSP	0.000713841			3000	67738	1196	11534	38806.6	0.0146628									-	44c45c
				44d	35	svSP	0.018342			10375	1097180	1196	11534	997125	0.376756									-	-
				44e	30	svSP	0.00730968			3712	433174	1196	11534	397376	0.150146									-	-
				44f	28	svSP	0.00559968			3270	335951	1196	11534	304416	0.115021									-	-
				44g	20	svSP	0.00114745			4116	102073	1196	11534	62379.1	0.0235695									-	-
				44h	16	CTL	0.00551864			6489	362589	1196	11534	300010	0.113357									-	-
				44i	15	CTL	0.00763245			8140	493424	1196	11534	414923	0.156776									-	-
														2.64661e+06	1
			45					15876	0.0210049
				45a	70	svSP	0.000115526			2880	35793	558	4851	10755.6	0.00549998									-	43a44a45a
				45b	55	svMP	0.000552132			3876	85100	558	4851	51403.8	0.0262859									-	44b45b
				45c	45	svSP	0.000246568			2678	46237	558	4851	22955.7	0.0117386									-	44c45c
				45d	35	svSP	0.00591709			6893	610810	558	4851	550885	0.281701									-	-
				45e	30	svSP	0.00664014			6095	671189	558	4851	618202	0.316124									-	-
				45f	28	LAAO	0.00192514			2958	204947	558	4851	179231	0.0916519									main LAAO	-
				45g	20	svSP	0.000131811			2828	36857	558	4851	12271.6	0.00627524									-	44g45g
				45h	16	CTL	0.00101208			5085	138432	558	4851	94225.3	0.0481831									-	-
				45i	15	CTL	0.00446438			9204	495652	558	4851	415637	0.21254									-	-
														1.95557e+06	1
			46					9042	0.0119631
				46a	60	svMP	0.00129108			6038	322275	450	4902	256501	0.107922									-
				46b	55	svSP	0.00238195			7104	550613	450	4902	473227	0.199109									most svSP	-
				46c	35	svSP	0.00171594			3630	380451	450	4902	340908	0.143436									most svSP	-
				46d	31	LAAO	0.00135025			4066	312548	450	4902	268256	0.112868									most LAAO	-
				46e	28	LAAO	0.000217234			3264	78714	450	4902	43158.2	0.0181587									MS man. comp. to 46d	-
				46f	16	NGF	0.000637962			4902	180144	450	4902	126745	0.0533275									-	-
				46g	15	CTL	0.00236917			6144	537615	450	4902	470686	0.19804									-	-
				46h	14	CTL	0.00199951			4032	441168	450	4902	397246	0.16714									-	-
														2.37673e+06	1
			47					15795.6	0.0208985
				47a	60	svMP	0.00126108			2511	125243	658	6916	98850.8	0.0603429									MS man. comp. to 46a	-
				47b	55	svSP	0.000582304			2392	70786	658	6916	45644.6	0.0278635									-
				47c	42	svSP	0.00152088			3960	160838	658	6916	119216	0.0727746									-
				47d	35	svSP	0.00202771			3774	198611	658	6916	158944	0.0970264									-
				47e	31	svSP	0.00085559			2600	94394	658	6916	67066.3	0.0409403									-	47e48d
				47f	28	svSP	0.00346214			5106	325051	658	6916	271384	0.165665									-
				47g	16	NGF	0.000418854			4104	75968	658	6916	32832.3	0.0200423									MS man. comp. to 46f	47g48f
				47h	15	CTL	0.00566057			5808	504756	658	6916	443710	0.27086									-
				47i	14	CTL	0.00510937			4560	448432	658	6916	400503	0.244485									-
														1.63815e+06	1
			48					10669	0.0141157
				48a	60	svMP	0.000212223			2068	38776	810	7899	18609.2	0.0150345									MS man. comp. to 41d and 46b
				48b	45	svSP	0.000805453			3920	108855	810	7899	70627.7	0.0570607									-
				48c	35	svSP	0.00310113			4600	316787	810	7899	271928	0.219693									-
				48d	31	svSP	0.000651794			1974	76404	810	7899	57153.8	0.0461751									-	47e48d
				48e	28	svSP	0.00299713			4601	307678	810	7899	262810	0.212326									-	-
				48f	16	NGF	0.000456025			3939	78400	810	7899	39987.5	0.0323062									MS man. comp. to 46f	47g48f
				48g	15	CTL	0.00324973			4368	327555	810	7899	284959	0.230221									-	-
				48h	14	CTL	0.00264223			4408	274675	810	7899	231689	0.187183									-	-
														1.23776e+06	1
			49					18507.1	0.024486
				49a	120	NA	6.34662e-05			2548	33111	616	6708	5364.27	0.00259194									-	-
				49b	100	NA	7.46671e-05			2772	36497	616	6708	6311	0.00304938									-	-
				49c	50	LAAO	0.00624937			7147	606036	616	6708	528208	0.255223										-
				49d	45	LAAO	0.00106498			2835	120886	616	6708	90014	0.0434935									most LAAO	-
				49e	35	svSP	0.00379044			4600	370467	616	6708	320375	0.154801									-	-
				49f	31	svSP	0.00120317			2178	125412	616	6708	101694	0.0491373									-	-
				49g	28	svSP	0.00443685			5170	431310	616	6708	375011	0.1812									most svSP	-
				49h	20	LAAO	0.000662614			3880	98257	616	6708	56005.3	0.027061									-	-
				49i	16	CTL	0.00251778			5123	268595	616	6708	212808	0.102826									-	-
				49k	15	CTL	0.00442262			8360	464845	616	6708	373808	0.180619									-	-
														2.0696e+06	1
			50					18729	0.0247796
				50a	50	LAAO	0.00333622			5474	311998	616	6607	253286	0.134636									-	-
				50b	45	svSP	0.000385321			2375	54727	616	6607	29253.6	0.01555									-	50b51c
				50c	35	svSP	0.0014049			3102	139931	616	6607	106660	0.0566959									-	-
				50d	31	svSP	0.00144104			2744	138835	616	6607	109404	0.0581544									-	-
				50e	28	svSP	0.00406608			4752	359665	616	6607	308697	0.16409										-
				50f	17	CTL	0.000821196			3234	97032	616	6607	62345.2	0.0331401									MS man. comp. to 51g	-
				50g	16	CTL	0.00285375			4968	269942	616	6607	216657	0.115166									MS man. comp. to 49i	-
				50h	15	CTL	0.00623846			5883	536723	616	6607	473624	0.251758									-	-
				50i	13	CTL	0.00423259			4560	370247	616	6607	321338	0.17081									-	-
														1.88126e+06	1
			51					13946.7	0.0184523
				51a	110	NA	0.000142008			2208	36805	870	8921	14164.1	0.00769593									-
				51b	50	LAAO	0.00164842			4784	342290	870	8921	293235	0.159326	0.560698	51c	LAAO	1544.76	9640				mix
						svMP	0.00129152									0.439302		LAAO	1279.61	2680				mix
				51c	45	svSP	0.000279964			2700	55610	870	8921	27924.1	0.0151723			LAAO	1003.54	1490	13810	0.560698		-	50b51c
				51d	35	svSp	0.000746801			3069	105957	870	8921	74487.4	0.040472			svMP	1612.7	6240				MS man. comp. to 50c	-
				51e	31	svSP	0.000914961			3232	124401	870	8921	91260	0.0495852			svMP	1169.63	2440				MS man. comp. to 50c	-
				51f	28	svsp	0.0026124			4264	304289	870	8921	260566	0.141576			svMP	1025.41	2140	10820	0.439302			-
				51g	17	CTL	0.00258425			4305	301902	870	8921	257758	0.14005						24630				-
				51h	16	CTL	0.00219696			3922	259345	870	8921	219129	0.119061									MS man. comp. to 49i	-
				51i	15	CTL	0.00360833			5123	412433	870	8921	359902	0.195549									-	-
				51k	13	CTL	0.00242669			4400	287161	870	8921	242043	0.131512									-	-
														1.84047e+06	1
			52					18237.9	0.0241298
				52a	70	NA	0.000165762			2511	39483	332	3211	15197.4	0.00686961									-	-
				52b	50	LAAO	0.00131806			5151	278137	332	3211	228318	0.103206	0.529272	52c	LAAO	1789.94	484				mix	-
						svMP	0.00117227									0.470728		LAAO	1544.76	935				mix	-
				52c	45	svSP	0.000498569			3441	78990	332	3211	45709.7	0.0206619			LAAO	1003.54	629	1564	0.529272		MS man. comp. to 50b	-
				52d	35	svSP	0.000946887			3705	122646	332	3211	86812.4	0.0392414			svMP	1612.7	428				MS man. comp. to 50b	-
				52e	31	svSP	0.000863011			2688	105120	332	3211	79122.5	0.0357654			svMP	1169.63	372				-
				52f	28	svSP	0.00302696			4410	320170	332	3211	277518	0.125445			svMP	1635.75	591	1391	0.470728		-
				52g	25	svSP	0.000558482			3045	80653	332	3211	51202.7	0.0231449						2955			MS man. comp. to 52f	52g53f
				52h	17	CTL	0.00215598			4700	243121	332	3211	197664	0.0893491									-	-
				52i	16	CTL	0.00190719			4056	214083	332	3211	174855	0.0790387									MS man. comp. to 49i	-
				52k	15	CTL	0.00606292			6000	613890	332	3211	555860	0.251263									-	-
				52l	13	CTL	0.00545371			6069	558704	332	3211	500007	0.226016									-	-
														2.21227e+06	1
			53					7322.1	0.00968756
				53a	60	LAAO	0.00211964			5664	462541	475	4641	407201	0.2188									-	-
				53b	40	svSP	0.00042651			4158	122562	475	4641	81936.2	0.0440265									MS man. comp. to 50b	-
				53c	35	svSP	0.000414816			3672	115567	475	4641	79689.6	0.0428194									-	-
				53d	31	svSP	0.000412796			3328	111818	475	4641	79301.7	0.0426109									-	-
				53e	28	svSP	0.00147556			4558	328001	475	4641	283467	0.152314									-	-
				53f	25	svSP	0.000191597			2943	65562	475	4641	36807.3	0.0197776									MS man. comp. to 52f	52g53f
				53g	17	CTL	0.000188897			3572	71189	475	4641	36288.7	0.0194989									MS man. comp. to 51g and 49i	-
				53h	16	CTL	0.000279881			4343	96201	475	4641	53767.6	0.0288908									MS man. comp. to 49i	-
				53i	15	CTL	0.00226625			5424	488362	475	4641	435367	0.233934									-	-
				53k	13	CTL	0.00191162			5244	418475	475	4641	367238	0.197327									-	-
														1.86106e+06	1
			54					43318.9	0.0573134
				54a	110	svMP	0.00144574			3131	132235	316	4021	92394	0.0252251									MS man. comp. to 54d	-
				54b	80	svMP	0.0012937			4142	135383	316	4021	82677.4	0.0225723									MS man. comp. to 54d	-
				54c	60	svMP	0.00453758			4104	342209	316	4021	289987	0.0791714									MS man. comp. to 54d	-
				54d	50	svMP	0.0201561			11468	1434056	316	4021	1.28813e+06	0.351681									man(most svMP)	-
				54e	35	svsp	0.00498068			4214	371926	316	4021	318304	0.0869025									-	-
				54f	31	svsp	0.00332144			2626	245681	316	4021	212266	0.0579522									-	-
				54g	28	svSP	0.00769562			5100	556706	316	4021	491810	0.134273									man(most svSP)	-
				54h	25	svMP	0.00188686			2304	149903	316	4021	120585	0.0329219									MS man. comp. to 54d	-
				54i	17	CTL	0.000603554			3330	80945	316	4021	38571.8	0.0105308									MS man. comp. to 53g	-
				54k	16	CTL	0.00107564			3939	118864	316	4021	68741.5	0.0187676									MS man. comp. to 49f
				54l	15	CTL	0.00651008			5830	490230	316	4021	416045	0.113587									-	-
				54m	13	CTL	0.00380646			4928	305970	316	4021	243263	0.0664149									-	-
														3.66277e+06	1
			55					50098.7	0.0662835
				55a	110	svMP	0.000776471			3298	86321	837	10757	43935.6	0.0117144									-	-
				55b	80	svMP	0.000929746			4242	107126	837	10757	52608.4	0.0140268									MS man. comp. to 55d	-
				55c	60	svMP	0.00178537			3132	141275	837	10757	101023	0.0269354									-	-
				55d	50	svMP	0.0205816			11424	1311402	837	10757	1.16458e+06	0.310509									man(most svMP)	-
				55e	35	svSP	0.00443094			3955	301548	837	10757	250719	0.0668483									-	-
				55f	31	svSP	0.00427767			3240	283686	837	10757	242046	0.0645359									-	-
				55g	25	svMP	0.02018			13908	1320604	837	10757	1.14186e+06	0.30445									-	-
				55h	17	CTL	0.00122238			3400	112863	837	10757	69166.7	0.0184417									MS man. comp. to 53g	-
				55i	16	CTL	0.00205065			3762	164382	837	10757	116033	0.0309376									MS man. comp. to 49f	-
				55k	15	CTL	0.00798768			5562	523454	837	10757	451972	0.120508									-	-
				55l	13	CTL	0.00206095			4160	170080	837	10757	116616	0.031093									-	-
														3.75056e+06	1
							1	755825	1
						SOLL-counts	IST-counts	Summe
						244	244	1
						PLA2	23	0.178625
						svSP	62	0.176702
						DI	16	0.144819
						CTL	38	0.127016
						svMP	39	0.121135
						VEGF	17	0.0563362
						CRISP	8	0.0303293
						LAAO	12	0.0284126
						KUN	4	0.0117619
						NGF	5	0.00925147
						SVMP-i	3	0.0792529
						NP	3	0.0104253
						peptides	7	0.0242079
						NA	7	0.00172501
							811.466	2	IYEIVNLLNVIYR
							814.796	2	VTAMoxPKGAVKQPEQK
							627.031	3	TRIYEIVNLLNVIYR
							993.371	2	LTPGSQCADGECCDQCK

## Sheet: Table S2
			Supplementary Table S2. MS bottom-up annotation of the peptides detected in the V. seoanei venom pool analysed. Identification was carried out against the NCBI ‘Serpentes’ database and a set of proteins found as common contaminants (cRAP). Fraction numbers are based on the RP-HPLC profile. Band IDs are based on the SDS-PAGE profile in Figure 1.
	INDEX				pFIND results against DATABASE												Protein BLAST results against "Serpentes" (taxid:8570)
	Table S1		File_Name	Toxin family	Sequence	Modification	Exp.MH+	Charge	Q-value	Calc.MH+	Mass_Shift(Exp.-Calc.)	Raw_Score	Final_Score	Proteins	Positions	Miss.Clv. Sites	Description	Scientific Name	Max Score	Total Score	Query Cover	E value	Per. Ident	Acc. Len	Accession
	Table S2
	Table S3		VSeo_10a.159.159.2 File:"VSeo_10a.raw", NativeID:"controllerType=0 controllerNumber=1 scan=159"	KUN	FYYDSASK	7,GG[S];	1094.47	2	0	1094.48	-0.004219	8.19656	0.5	sp|Q6T6S5|VKT2_BITGA/	46,R,K/	0	RecName: Full=Kunitz-type serine protease inhibitor bitisilin-2; AltName: Full=BG-15; AltName: Full=Kunitz protease inhibitor 2; Flags: Precursor [Bitis gabonica]	Bitis gabonica	29.5	29.5	1	0.068	1	90	Q6T6S5.1
	Table S4		VSeo_10a.148.148.2 File:"VSeo_10a.raw", NativeID:"controllerType=0 controllerNumber=1 scan=148"	KUN	FYYDSASKKCK	0,Acetyl[ProteinN-term];10,Carbamidomethyl[C];	1438.64	2	0	1438.67	-0.02249	0.001	0.5	sp|Q6T6S5|VKT2_BITGA/	46,R,K/	2	RecName: Full=Kunitz-type serine protease inhibitor bitisilin-2; AltName: Full=BG-15; AltName: Full=Kunitz protease inhibitor 2; Flags: Precursor [Bitis gabonica]	Bitis gabonica	39.7	39.7	1	3e-05	1	90	Q6T6S5.1
	Table S5
	Table S6		VSeo_11a.196.196.2 File:"VSeo_11a.raw", NativeID:"controllerType=0 controllerNumber=1 scan=196"	KUN	TYGGCKGNANNFK	5,unknown[326.141 Da][C];	1699.75	2	0	1699.77	-0.014149	9.43386	0.000922768	sp|C1IC50|VKT1_WALAE/	57,F,T/	1	RecName: Full=Protease inhibitor 1; AltName: Full=Kunitz inhibitor KIn-I; Flags: Precursor [Walterinnesia aegyptia]	Walterinnesia aegyptia	44.8	44.8	1	7e-07	1	81	C1IC50.1
			VSeo_11a.165.165.2 File:"VSeo_11a.raw", NativeID:"controllerType=0 controllerNumber=1 scan=165"	KUN	FYYDSASNK		1094.47	2	0	1094.48	-0.007144	7.7796	0.00314786	sp|P00991|VKT1_VIPAA/sp|P00992|VKT3_VIPAA/sp|I2G9B4|VKT_MACLN/sp|Q6T269|VKT3_BITGA/sp|E5AJX3|VKT_VIPBN/	46,R,C/46,S,C/46,R,C/87,R,C/46,S,C/	0	RecName: Full=Kunitz-type serine protease inhibitor bitisilin-3; AltName: Full=Two-Kunitz protease inhibitor [Bitis gabonica]	Bitis gabonica	32.9	65.8	1	0.005	1	151	Q6T269.1
			VSeo_11a.171.171.2 File:"VSeo_11a.raw", NativeID:"controllerType=0 controllerNumber=1 scan=171"	KUN	FYYDSASK	5,GG[S];	1094.47	2	0	1094.48	-0.006172	2.26616	0.0591309	sp|Q6T6S5|VKT2_BITGA/	46,R,K/	0	RecName: Full=Kunitz-type serine protease inhibitor bitisilin-2; AltName: Full=BG-15; AltName: Full=Kunitz protease inhibitor 2; Flags: Precursor [Bitis gabonica]	Bitis gabonica	29.5	29.5	1	0.068	1	90	Q6T6S5.1
			VSeo_11a.136.136.6 File:"VSeo_11a.raw", NativeID:"controllerType=0 controllerNumber=1 scan=136"	KUN	CYLPADTGPCMANFPRFYYDSASKK	0,Acetyl[ProteinN-term];11,Oxidation[M];13,Deamidated[N];	2904.28	6	0	2904.27	0.013741	0.009095	0.279987	sp|Q6T6S5|VKT2_BITGA/	30,F,C/	2	RecName: Full=Kunitz-type serine protease inhibitor bitisilin-2; AltName: Full=BG-15; AltName: Full=Kunitz protease inhibitor 2; Flags: Precursor [Bitis gabonica]	Bitis gabonica	87.6	87.6	1	3e-21	1	90	Q6T6S5.1
			VSeo_11a.219.219.2 File:"VSeo_11a.raw", NativeID:"controllerType=0 controllerNumber=1 scan=219"	KUN	KCFASAAR	2,unknown[326.141 Da][C];	1179.59	2	0	1179.59	0.018426	0.980017	0.36193	sp|Q6T6S5|VKT2_BITGA/	79,K,R/	1	RecName: Full=Kunitz-type serine protease inhibitor bitisilin-2; AltName: Full=BG-15; AltName: Full=Kunitz protease inhibitor 2; Flags: Precursor [Bitis gabonica]	Bitis gabonica	27.8	27.8	1	0.27	1	90	Q6T6S5.1
			VSeo_12a.150.150.2 File:"VSeo_12a.raw", NativeID:"controllerType=0 controllerNumber=1 scan=150"	KUN	EFIYGGCHGNANK	1,Glu->Thr[E];7,Carbamidomethyl[C];	1438.64	2	0	1438.65	-0.009789	9.7501	0.0602031	sp|A8Y7P1|VKTB1_DABSI/sp|A8Y7P5|VKTB5_DABSI/	57,K,F/57,K,F/	0	RecName: Full=Kunitz-type serine protease inhibitor B5; AltName: Full=BBPTI-5; Short=BPTI-5; AltName: Full=Trypsin inhibitor 5; AltName: Full=Trypsin inhibitor B5; Flags: Precursor [Daboia siamensis]	Daboia siamensis	46	46	1	3e-07	1	90	A8Y7P5.1
			VSeo_12a.193.193.2 File:"VSeo_12a.raw", NativeID:"controllerType=0 controllerNumber=1 scan=193"	KUN	FIYGGCYGNANNFK	6,unknown[132.058 Da][C];	1699.75	2	0	1699.76	-0.003807	10.0389	0.0948306	sp|B5KL33|VKT2_TROCA/sp|Q6ITB1|VKT_PSEPO/sp|Q6ITB3|VKT1_NOTSC/sp|B5KF96|VKT2_CRYNI/sp|B5KL35|VKT4_CRYNI/sp|Q6ITB0|VKT1_TROCA/sp|Q6ITB2|VKT2_NOTSC/sp|B5KL34|VKT3_CRYNI/sp|B5KL36|VKT5_CRYNI/sp|B5KL30|VKT4_OXYSC/sp|B5G6G6|VKT2_PSEPO/sp|B5KF95|VKT1_CRYNI/sp|A6MFL4|VKT4_DEMVE/sp|B5L5R4|IVBI4_NOTSC/sp|B5L5R0|IVBI4_PSEPO/	58,E,T/58,E,T/58,E,T/58,E,T/58,E,T/58,E,T/58,E,T/58,E,T/58,E,T/58,G,T/58,E,T/58,E,T/58,E,A/58,M,T/58,E,T/	0	RecName: Full=Kunitz-type serine protease inhibitor vestiginin-4; Flags: Precursor [Demansia vestigiata]	Demansia vestigiata	50.3	50.3	1	1e-08	1	83	A6MFL4.1
			VSeo_12a.162.162.2 File:"VSeo_12a.raw", NativeID:"controllerType=0 controllerNumber=1 scan=162"	KUN	FYYDSASNK		1094.47	2	0	1094.48	-0.008364	8.24329	0.0949783	sp|P00991|VKT1_VIPAA/sp|P00992|VKT3_VIPAA/sp|I2G9B4|VKT_MACLN/sp|Q6T269|VKT3_BITGA/sp|E5AJX3|VKT_VIPBN/	46,R,C/46,S,C/46,R,C/87,R,C/46,S,C/	0	RecName: Full=Kunitz-type serine protease inhibitor bitisilin-3; AltName: Full=Two-Kunitz protease inhibitor [Bitis gabonica]	Bitis gabonica	32.9	65.8	1	0.005	1	151	Q6T269.1
			VSeo_12a.235.235.2 File:"VSeo_12a.raw", NativeID:"controllerType=0 controllerNumber=1 scan=235"	KUN	CNAYMPSFYYDSASNK	1,Carbamidomethyl[C];5,Oxidation[M];	1933.76	2	0	1933.77	-0.011037	1.00987	0.128598	sp|E5AJX3|VKT_VIPBN/	39,E,C/	0	RecName: Full=Kunitz-type serine protease inhibitor ki-VN; Flags: Precursor [Vipera berus nikolskii]	Vipera berus nikolskii	57.9	57.9	1	3e-11	1	95	E5AJX3.1
			VSeo_12a.265.265.2 File:"VSeo_12a.raw", NativeID:"controllerType=0 controllerNumber=1 scan=265"	KUN	CLAYMPSFYYDSASNK	0,Acetyl[ProteinN-term];5,Oxidation[M];	1917.77	2	0	1917.8	-0.035171	1.00911	0.149097	sp|P00992|VKT3_VIPAA/	39,R,C/	0	RecName: Full=Kunitz-type serine protease inhibitor 3; AltName: Full=Venom basic protease inhibitor 3; AltName: Full=Venom chymotrypsin inhibitor; Short=cVamChi; Flags: Precursor [Vipera ammodytes ammodytes]	Vipera ammodytes ammodytes	57.5	57.5	1	4e-11	1	93	P00992.2
			VSeo_12a.163.163.2 File:"VSeo_12a.raw", NativeID:"controllerType=0 controllerNumber=1 scan=163"	KUN	SFYYDSESK	7,Glu->Thr[E];	1097.48	2	0	1097.48	0.000394	0.516766	0.201823	sp|A8Y7N6|VKTC3_DABSI/sp|A8Y7N7|VKTC4_DABSI/sp|A8Y7P1|VKTB1_DABSI/sp|A8Y7P5|VKTB5_DABSI/	45,R,K/45,R,K/45,R,K/45,R,K/	0	RecName: Full=Kunitz-type serine protease inhibitor B5; AltName: Full=BBPTI-5; Short=BPTI-5; AltName: Full=Trypsin inhibitor 5; AltName: Full=Trypsin inhibitor B5; Flags: Precursor [Daboia siamensis]	Daboia siamensis	32.9	32.9	1	0.005	1	90	A8Y7P5.1
			VSeo_12a.192.192.3 File:"VSeo_12a.raw", NativeID:"controllerType=0 controllerNumber=1 scan=192"	KUN	YLPADPAECNAYMPR	8,Glu->Thr[E];10,Deamidated[N];13,Oxidation[M];	1699.76	3	0	1699.75	0.009659	0.604636	0.252504	sp|I2G9B4|VKT_MACLN/	31,C,F/	0	RecName: Full=Kunitz-type serine protease inhibitor PIVL; Flags: Precursor [Macrovipera lebetina transmediterranea]	Macrovipera lebetina transmediterranea	54.9	54.9	1	3e-10	1	95	I2G9B4.1
			VSeo_12a.240.240.2 File:"VSeo_12a.raw", NativeID:"controllerType=0 controllerNumber=1 scan=240"	KUN	FYYDSASNK	0,Acetyl[ProteinN-term];	1136.49	2	0	1136.49	-0.002816	1.82608	0.273474	sp|P00991|VKT1_VIPAA/sp|P00992|VKT3_VIPAA/sp|I2G9B4|VKT_MACLN/sp|Q6T269|VKT3_BITGA/sp|E5AJX3|VKT_VIPBN/	46,R,C/46,S,C/46,R,C/87,R,C/46,S,C/	0	RecName: Full=Kunitz-type serine protease inhibitor bitisilin-3; AltName: Full=Two-Kunitz protease inhibitor [Bitis gabonica]	Bitis gabonica	32.9	65.8	1	0.005	1	151	Q6T269.1
			VSeo_12a.211.211.2 File:"VSeo_12a.raw", NativeID:"controllerType=0 controllerNumber=1 scan=211"	KUN	VFIYGGCPGNANNFK	0,Acetyl[ProteinN-term];7,Carbamidomethyl[C];10,Deamidated[N];	1700.74	2	0	1700.77	-0.030681	0.987159	0.27489	sp|Q6T269|VKT3_BITGA/	44,E,T/	0	RecName: Full=Kunitz-type serine protease inhibitor bitisilin-3; AltName: Full=Two-Kunitz protease inhibitor [Bitis gabonica]	Bitis gabonica	52.4	100	1	2e-09	1	151	Q6T269.1
			VSeo_12a.270.270.3 File:"VSeo_12a.raw", NativeID:"controllerType=0 controllerNumber=1 scan=270"	KUN	AEPGECNAYMPSFYYDSASNKCK	2,Glu->Thr[E];5,Glu->Thr[E];6,Carbamidomethyl[C];10,Oxidation[M];	2592.06	3	0	2592.08	-0.019433	1.00135	0.291274	sp|E5AJX3|VKT_VIPBN/	34,P,K/	1	RecName: Full=Kunitz-type serine protease inhibitor ki-VN; Flags: Precursor [Vipera berus nikolskii]	Vipera berus nikolskii	80.4	80.4	1	1e-18	1	95	E5AJX3.1
			VSeo_14a.205.205.2 File:"VSeo_14a.raw", NativeID:"controllerType=0 controllerNumber=1 scan=205"	DI	FLNAGTICNR	8,Carbamidomethyl[C];	1165.57	2	0	1165.58	-0.008695	11.0216	0.169	sp|P83253|DID1A_MACLB/	77,K,A/	0	RecName: Full=Disintegrin lebein-1-alpha; AltName: Full=ML-3; AltName: Full=MS-II; AltName: Full=Platelet aggregation activation inhibitor; Flags: Precursor [Macrovipera lebetina]	Macrovipera lebetina	35.8	35.8	1	0.0005	1	111	P83253.2
			VSeo_14a.127.127.3 File:"VSeo_14a.raw", NativeID:"controllerType=0 controllerNumber=1 scan=127"	DI	NSANPCCDPVTCKPR	0,Acetyl[ProteinN-term];4,Deamidated[N];6,Carbamidomethyl[C];7,Carbamidomethyl[C];	1761.74	3	0	1761.74	0.000281	0.004904	0.231746	sp|P0C6A5|VM2A6_VIPAA/	0,-,R/	1	RecName: Full=Disintegrin VA6 [Vipera ammodytes ammodytes]	Vipera ammodytes ammodytes	53.7	53.7	1	6e-10	1	64	P0C6A5.1
			VSeo_14a.118.118.3 File:"VSeo_14a.raw", NativeID:"controllerType=0 controllerNumber=1 scan=118"	DI	NSANPCCDPVTCKPR	0,Acetyl[ProteinN-term];4,Deamidated[N];	1647.69	3	0	1647.69	-0.001835	0.009953	0.273005	sp|P0C6A5|VM2A6_VIPAA/	0,-,R/	1	RecName: Full=Disintegrin VA6 [Vipera ammodytes ammodytes]	Vipera ammodytes ammodytes	53.7	53.7	1	6e-10	1	64	P0C6A5.1
			VSeo_14a.143.143.2 File:"VSeo_14a.raw", NativeID:"controllerType=0 controllerNumber=1 scan=143"	DI	RGEHCVSGPCCRNCK	10,Carbamidomethyl[C];11,Carbamidomethyl[C];	1762.72	2	0	1762.74	-0.014552	0.001	0.274917	sp|P0C6A5|VM2A6_VIPAA/sp|P0C6A8|DID4_MACLO/sp|P0C6A6|DID7A_VIPBB/sp|P83253|DID1A_MACLB/sp|P0C6B0|DID5B_MACLO/	15,R,F/16,R,F/15,R,F/62,R,F/16,R,F/	2	RecName: Full=Disintegrin VLO4 [Macrovipera lebetina obtusa]	Macrovipera lebetina obtusa	54.5	54.5	1	3e-10	1	65	P0C6A8.1
			VSeo_15a.213.213.2 File:"VSeo_15a.raw", NativeID:"controllerType=0 controllerNumber=1 scan=213"	DI	FLNAGTICNR	8,Carbamidomethyl[C];	1165.57	2	0	1165.58	-0.007597	12.5432	0.100664	sp|P83253|DID1A_MACLB/	77,K,A/	0	RecName: Full=Disintegrin lebein-1-alpha; AltName: Full=ML-3; AltName: Full=MS-II; AltName: Full=Platelet aggregation activation inhibitor; Flags: Precursor [Macrovipera lebetina]	Macrovipera lebetina	35.8	35.8	1	0.0005	1	111	P83253.2
			VSeo_15a.218.218.2 File:"VSeo_15a.raw", NativeID:"controllerType=0 controllerNumber=1 scan=218"	DI	FLNAGTICNR	3,Deamidated[N];8,Carbamidomethyl[C];	1166.56	2	0	1166.56	-0.003576	7.28587	0.186351	sp|P83253|DID1A_MACLB/	77,K,A/	0	RecName: Full=Disintegrin lebein-1-alpha; AltName: Full=ML-3; AltName: Full=MS-II; AltName: Full=Platelet aggregation activation inhibitor; Flags: Precursor [Macrovipera lebetina]	Macrovipera lebetina	35.8	35.8	1	0.0005	1	111	P83253.2
			VSeo_15a.49.49.3 File:"VSeo_15a.raw", NativeID:"controllerType=0 controllerNumber=1 scan=49"	DI	RGEHCVSGPCCR	5,Carbamidomethyl[C];10,Carbamidomethyl[C];11,Carbamidomethyl[C];	1474.61	3	0	1474.61	-0.001856	6.08885	0.187305	sp|P0C6A5|VM2A6_VIPAA/sp|P0C6A8|DID4_MACLO/sp|P0C6A6|DID7A_VIPBB/sp|P83253|DID1A_MACLB/sp|P0C6B0|DID5B_MACLO/	15,R,N/16,R,N/15,R,N/62,R,N/16,R,N/	1	RecName: Full=Disintegrin lebein-1-alpha; AltName: Full=ML-3; AltName: Full=MS-II; AltName: Full=Platelet aggregation activation inhibitor; Flags: Precursor [Macrovipera lebetina]	Macrovipera lebetina	43.9	43.9	1	1e-06	1	111	P83253.2
			VSeo_15a.140.140.3 File:"VSeo_15a.raw", NativeID:"controllerType=0 controllerNumber=1 scan=140"	DI	RGEHCVSGPCCRNCK	10,Carbamidomethyl[C];11,Carbamidomethyl[C];	1762.73	3	0.37632	1762.74	-0.000283	0.821835	0.988936	sp|P0C6A5|VM2A6_VIPAA/sp|P0C6A8|DID4_MACLO/sp|P0C6A6|DID7A_VIPBB/sp|P83253|DID1A_MACLB/sp|P0C6B0|DID5B_MACLO/	15,R,F/16,R,F/15,R,F/62,R,F/16,R,F/	2	RecName: Full=Disintegrin VLO4 [Macrovipera lebetina obtusa]	Macrovipera lebetina obtusa	54.5	54.5	1	3e-10	1	65	P0C6A8.1
			VSeo_15b.170.170.2 File:"VSeo_15b.raw", NativeID:"controllerType=0 controllerNumber=1 scan=170"	NP	IGSVSGLGCNR	9,Carbamidomethyl[C];11,Arg->Lys[R];	1091.54	2	0	1091.55	-0.007447	12.933	0.0272406	sp|P83227|VNPB_OXYMI/sp|P83230|VNPC_OXYMI/sp|Q3SAX8|VNPD_OXYSC/sp|Q3SAF7|VNPE_OXYMI/sp|P83231|VNPC_OXYSA/sp|Q3SAF4|VNPB_PSEAU/sp|P83226|VNPA_OXYSA/sp|P83228|VNPB_OXYSC/sp|P83224|VNPA_OXYMI/sp|P83225|VNPA_OXYSC/sp|Q3SAF8|VNPD_OXYMI/sp|Q3SAF5|VNPA_PSEAU/sp|P83229|VNPB_OXYSA/	16,H,P/16,R,I/21,R,L/16,H,P/16,R,I/16,H,P/16,H,P/87,H,P/16,H,P/16,H,P/16,R,L/16,R,L/16,H,P/	0	RecName: Full=Natriuretic peptide TNP-b; AltName: Full=Taipan natriuretic peptide; AltName: Full=Venom natriuretic peptide OxsSNPb [Oxyuranus microlepidotus]	Oxyuranus microlepidotus	36.3	36.3	1	0.0004	1	35	P83227.1
			VSeo_16a.212.212.2 File:"VSeo_16a.raw", NativeID:"controllerType=0 controllerNumber=1 scan=212"	DI	FLNAGTICNR	8,Carbamidomethyl[C];	1165.57	2	0	1165.58	-0.008451	13.5131	6.00988e-06	sp|P83253|DID1A_MACLB/	77,K,A/	0	RecName: Full=Disintegrin lebein-1-alpha; AltName: Full=ML-3; AltName: Full=MS-II; AltName: Full=Platelet aggregation activation inhibitor; Flags: Precursor [Macrovipera lebetina]	Macrovipera lebetina	35.8	35.8	1	0.0005	1	111	P83253.2
			VSeo_16a.300.300.2 File:"VSeo_16a.raw", NativeID:"controllerType=0 controllerNumber=1 scan=300"	DI	FLNAGTICR	0,Acetyl[ProteinN-term];8,Carbamidomethyl[C];9,Dicarbamidomethyl[R];	1207.58	2	0	1207.59	-0.007791	7.35114	0.000569342	sp|P0C6A5|VM2A6_VIPAA/	30,K,Y/	0	RecName: Full=Disintegrin VA6 [Vipera ammodytes ammodytes]	Vipera ammodytes ammodytes	32.5	32.5	1	0.008	1	64	P0C6A5.1
			VSeo_16a.50.50.3 File:"VSeo_16a.raw", NativeID:"controllerType=0 controllerNumber=1 scan=50"	DI	RGEHCVSGPCCR	5,Carbamidomethyl[C];10,Carbamidomethyl[C];11,Carbamidomethyl[C];	1474.61	3	0	1474.61	-0.001673	6.9641	0.00735385	sp|P0C6A5|VM2A6_VIPAA/sp|P0C6A8|DID4_MACLO/sp|P0C6A6|DID7A_VIPBB/sp|P83253|DID1A_MACLB/sp|P0C6B0|DID5B_MACLO/	15,R,N/16,R,N/15,R,N/62,R,N/16,R,N/	1	RecName: Full=Disintegrin lebein-1-alpha; AltName: Full=ML-3; AltName: Full=MS-II; AltName: Full=Platelet aggregation activation inhibitor; Flags: Precursor [Macrovipera lebetina]	Macrovipera lebetina	43.9	43.9	1	1e-06	1	111	P83253.2
			VSeo_16a.129.129.2 File:"VSeo_16a.raw", NativeID:"controllerType=0 controllerNumber=1 scan=129"	DI	NSANPCCDPVTCKPR	0,Acetyl[ProteinN-term];1,Deamidated[N];6,Carbamidomethyl[C];12,Carbamidomethyl[C];	1761.74	2	0	1761.74	0.002248	3.22623	0.110118	sp|P0C6A5|VM2A6_VIPAA/	0,-,R/	1	RecName: Full=Disintegrin VA6 [Vipera ammodytes ammodytes]	Vipera ammodytes ammodytes	53.7	53.7	1	6e-10	1	64	P0C6A5.1
			VSeo_16a.239.239.4 File:"VSeo_16a.raw", NativeID:"controllerType=0 controllerNumber=1 scan=239"	DI	FLNAGTICRYARGDDMNDYCTGVTSDCPR	3,unknown[2.988 Da](1)[N];17,Deamidated[N];20,Carbamidomethyl[C];27,Carbamidomethyl[C];	3332.36	4	0	3332.4	-0.039858	0.965691	0.127585	sp|P0C6A5|VM2A6_VIPAA/	30,K,N/	2	RecName: Full=Disintegrin VA6 [Vipera ammodytes ammodytes]	Vipera ammodytes ammodytes	100	100	1	2e-26	1	64	P0C6A5.1
			VSeo_16a.183.183.2 File:"VSeo_16a.raw", NativeID:"controllerType=0 controllerNumber=1 scan=183"	DI	GDDMNDYCTGVTSDCPR	0,Acetyl[ProteinN-term];4,Oxidation[M];5,Deamidated[N];15,Carbamidomethyl[C];	1964.69	2	0	1964.69	0.00018	2.61473	0.2653	sp|P0C6A5|VM2A6_VIPAA/	42,R,N/	0	RecName: Full=Disintegrin VA6 [Vipera ammodytes ammodytes]	Vipera ammodytes ammodytes	60.9	60.9	1	2e-12	1	64	P0C6A5.1
			VSeo_16a.149.149.2 File:"VSeo_16a.raw", NativeID:"controllerType=0 controllerNumber=1 scan=149"	DI	NSANPCCDPVTCKPR	0,Acetyl[ProteinN-term];1,Deamidated[N];4,Deamidated[N];6,Carbamidomethyl[C];12,Carbamidomethyl[C];	1762.72	2	0	1762.72	0.003339	1.73933	0.326911	sp|P0C6A5|VM2A6_VIPAA/	0,-,R/	1	RecName: Full=Disintegrin VA6 [Vipera ammodytes ammodytes]	Vipera ammodytes ammodytes	53.7	53.7	1	6e-10	1	64	P0C6A5.1
			VSeo_16b.167.167.2 File:"VSeo_16b.raw", NativeID:"controllerType=0 controllerNumber=1 scan=167"	NP	IGSHSGLGCNK	4,His->Val[H];9,Carbamidomethyl[C];	1091.54	2	0	1091.55	-0.007448	11.6136	0.0137018	sp|P82972|VNP_PSEPC/sp|Q7LZ09|LEB_MACLB/	21,R,F/21,R,V/	0	RecName: Full=Natriuretic peptide PNP [Pseudocerastes persicus]	Pseudocerastes persicus	36.7	36.7	1	0.0003	1	37	P82972.1
			VSeo_16b.295.295.2 File:"VSeo_16b.raw", NativeID:"controllerType=0 controllerNumber=1 scan=295"	NP	KKAPDGCFGHK	4,Pro->Thr[P];	1191.59	2	0.78985	1191.59	-0.005056	0.002	0.99994	sp|P82972|VNP_PSEPC/	7,K,I/	2	RecName: Full=Natriuretic peptide PNP [Pseudocerastes persicus]	Pseudocerastes persicus	38.4	38.4	1	7e-05	1	37	P82972.1
			VSeo_17a.208.208.2 File:"VSeo_17a.raw", NativeID:"controllerType=0 controllerNumber=1 scan=208"	DI	FLNAGTICRY	8,Carbamidomethyl[C];10,Tyr->Asn[Y];	1165.57	2	0	1165.58	-0.007963	12.5298	0.000164205	sp|P0C6A5|VM2A6_VIPAA/	30,K,A/	1	RecName: Full=Disintegrin VA6 [Vipera ammodytes ammodytes]	Vipera ammodytes ammodytes	36.7	36.7	1	0.0003	1	64	P0C6A5.1
			VSeo_17a.211.211.2 File:"VSeo_17a.raw", NativeID:"controllerType=0 controllerNumber=1 scan=211"	DI	FLNAGTICR	8,Carbamidomethyl[C];9,Dicarbamidomethyl[R];	1165.57	2	0	1165.58	-0.008334	12.2747	0.000210228	sp|P0C6A5|VM2A6_VIPAA/	30,K,Y/	0	RecName: Full=Disintegrin VA6 [Vipera ammodytes ammodytes]	Vipera ammodytes ammodytes	32.5	32.5	1	0.008	1	64	P0C6A5.1
			VSeo_17a.214.214.2 File:"VSeo_17a.raw", NativeID:"controllerType=0 controllerNumber=1 scan=214"	DI	FLNAGTICNRA	11,Ala->Gly[A];	1165.57	2	0	1165.58	-0.00796	9.62566	0.000514325	sp|P83253|DID1A_MACLB/	77,K,R/	1	RecName: Full=Disintegrin lebein-1-alpha; AltName: Full=ML-3; AltName: Full=MS-II; AltName: Full=Platelet aggregation activation inhibitor; Flags: Precursor [Macrovipera lebetina]	Macrovipera lebetina	38.4	38.4	1	8e-05	1	111	P83253.2
			VSeo_17a.217.217.2 File:"VSeo_17a.raw", NativeID:"controllerType=0 controllerNumber=1 scan=217"	DI	FLNAGTICNR	3,Deamidated[N];8,Carbamidomethyl[C];	1166.56	2	0	1166.56	-0.000158	7.87489	0.0283161	sp|P83253|DID1A_MACLB/	77,K,A/	0	RecName: Full=Disintegrin lebein-1-alpha; AltName: Full=ML-3; AltName: Full=MS-II; AltName: Full=Platelet aggregation activation inhibitor; Flags: Precursor [Macrovipera lebetina]	Macrovipera lebetina	35.8	35.8	1	0.0005	1	111	P83253.2
			VSeo_17a.49.49.3 File:"VSeo_17a.raw", NativeID:"controllerType=0 controllerNumber=1 scan=49"	DI	RGEHCVSGPCCR	5,Carbamidomethyl[C];10,Carbamidomethyl[C];11,Carbamidomethyl[C];	1474.61	3	0	1474.61	0.00025	9.23459	0.0880805	sp|P0C6A5|VM2A6_VIPAA/sp|P0C6A8|DID4_MACLO/sp|P0C6A6|DID7A_VIPBB/sp|P83253|DID1A_MACLB/sp|P0C6B0|DID5B_MACLO/	15,R,N/16,R,N/15,R,N/62,R,N/16,R,N/	1	RecName: Full=Disintegrin lebein-1-alpha; AltName: Full=ML-3; AltName: Full=MS-II; AltName: Full=Platelet aggregation activation inhibitor; Flags: Precursor [Macrovipera lebetina]	Macrovipera lebetina	43.9	43.9	1	1e-06	1	111	P83253.2
			Vseo_17b_manual_16b	NP	IGSHSGLGCNK	4,His->Val[H];9,Carbamidomethyl[C];	1091.54	2									RecName: Full=Natriuretic peptide PNP [Pseudocerastes persicus]	Pseudocerastes persicus	36.7	36.7	1	0.0003	1	37	P82972.1
																	z
			VSeo_18a.230.230.2 File:"VSeo_18a.raw", NativeID:"controllerType=0 controllerNumber=1 scan=230"	DI	GDWNDDYCTGISSDCPR	8,Carbamidomethyl[C];15,Carbamidomethyl[C];	2017.75	2	0	2017.76	-0.016782	14.3521	3.01645e-08	sp|P81743|VM2AB_ERIMA/	46,M,N/	0	eristocophin II [Eristocophis macmahoni=leaf-nosed viper, venom, Peptide, 61 aa] [Eristicophis macmahoni]	Eristicophis macmahoni	61.7	61.7	1	9e-13	1	61	AAB25266.1
			VSeo_18a.213.213.2 File:"VSeo_18a.raw", NativeID:"controllerType=0 controllerNumber=1 scan=213"	DI	FLNAGTICNR	8,Carbamidomethyl[C];	1165.57	2	0	1165.58	-0.008207	11.857	2.98532e-06	sp|P83253|DID1A_MACLB/	77,K,A/	0	RecName: Full=Disintegrin lebein-1-alpha; AltName: Full=ML-3; AltName: Full=MS-II; AltName: Full=Platelet aggregation activation inhibitor; Flags: Precursor [Macrovipera lebetina]	Macrovipera lebetina	35.8	35.8	1	0.0005	1	111	P83253.2
			VSeo_18a.131.131.3 File:"VSeo_18a.raw", NativeID:"controllerType=0 controllerNumber=1 scan=131"	DI	NSGNPCCDPVTCKPR	6,Carbamidomethyl[C];7,Carbamidomethyl[C];12,Carbamidomethyl[C];	1761.74	3	0	1761.75	-0.008939	5.58432	0.00170997	sp|P81743|VM2AB_ERIMA/sp|P0C6A7|VM27B_VIPBB/sp|P0C6A8|DID4_MACLO/sp|P83254|DID1B_MACLB/sp|P0C6A6|DID7A_VIPBB/sp|P83253|DID1A_MACLB/	4,Q,R/4,Q,E/1,M,R/0,-,R/0,-,R/47,M,R/	1	RecName: Full=Disintegrin VB7B [Vipera berus berus]	Vipera berus berus	53.7	53.7	1	6e-10	1	64	P0C6A7.1
			VSeo_18a.161.161.2 File:"VSeo_18a.raw", NativeID:"controllerType=0 controllerNumber=1 scan=161"	DI	QNSGNPCCDPVTCKPR	0,Gln->pyro-Glu[AnyN-termQ];7,Carbamidomethyl[C];8,Carbamidomethyl[C];13,Carbamidomethyl[C];	1872.76	2	0	1872.78	-0.015374	8.75814	0.0080039	sp|P81743|VM2AB_ERIMA/sp|P0C6A7|VM27B_VIPBB/	3,L,R/3,L,E/	1	RecName: Full=Disintegrin VB7B [Vipera berus berus]	Vipera berus berus	57.1	57.1	1	4e-11	1	64	P0C6A7.1
			VSeo_18a.51.51.3 File:"VSeo_18a.raw", NativeID:"controllerType=0 controllerNumber=1 scan=51"	DI	RGEHCVSGPCCR	5,Carbamidomethyl[C];10,Carbamidomethyl[C];11,Carbamidomethyl[C];	1474.61	3	0	1474.61	-0.003504	5.54127	0.0112041	sp|P0C6A5|VM2A6_VIPAA/sp|P0C6A8|DID4_MACLO/sp|P0C6A6|DID7A_VIPBB/sp|P83253|DID1A_MACLB/sp|P0C6B0|DID5B_MACLO/	15,R,N/16,R,N/15,R,N/62,R,N/16,R,N/	1	RecName: Full=Disintegrin lebein-1-alpha; AltName: Full=ML-3; AltName: Full=MS-II; AltName: Full=Platelet aggregation activation inhibitor; Flags: Precursor [Macrovipera lebetina]	Macrovipera lebetina	43.9	43.9	1	1e-06	1	111	P83253.2
			VSeo_18a.126.126.2 File:"VSeo_18a.raw", NativeID:"controllerType=0 controllerNumber=1 scan=126"	DI	SGNPCCDPVTCKPR	5,Carbamidomethyl[C];6,Carbamidomethyl[C];11,Carbamidomethyl[C];	1647.7	2	0	1647.7	-0.007935	2.0017	0.296546	sp|P81743|VM2AB_ERIMA/sp|P0C6A7|VM27B_VIPBB/sp|P0C6A8|DID4_MACLO/sp|P83254|DID1B_MACLB/sp|P0C6A6|DID7A_VIPBB/sp|P83253|DID1A_MACLB/	5,N,R/5,N,E/2,N,R/1,N,R/1,N,R/48,N,R/	1	metalloproteinase of class P-II MPII-1 [Vipera ammodytes ammodytes]	Vipera ammodytes ammodytes	50.3	71.3	1	9e-09	1	478	AMB36349.1
			VSeo_18a.182.182.2 File:"VSeo_18a.raw", NativeID:"controllerType=0 controllerNumber=1 scan=182"	DI	DDMNDYCTGVTSDCPR	0,Acetyl[ProteinN-term];3,Oxidation[M];4,Deamidated[N];7,Carbamidomethyl[C];14,Carbamidomethyl[C];	1964.69	2	0	1964.69	0.000666	3.81985	0.339057	sp|P0C6A5|VM2A6_VIPAA/	43,G,N/	0	RecName: Full=Disintegrin VA6 [Vipera ammodytes ammodytes]	Vipera ammodytes ammodytes	58.3	58.3	1	2e-11	1	64	P0C6A5.1
			VSeo_18a.170.170.3 File:"VSeo_18a.raw", NativeID:"controllerType=0 controllerNumber=1 scan=170"	DI	RGDDMNDYCTGVTSDCPR	1,Dicarbamidomethyl[R];5,Oxidation[M];16,Carbamidomethyl[C];	2191.83	3	0	2191.84	-0.009694	3.45604	0.375252	sp|P0C6A5|VM2A6_VIPAA/	41,A,N/	1	RecName: Full=Disintegrin VA6 [Vipera ammodytes ammodytes]	Vipera ammodytes ammodytes	64.3	64.3	1	1e-13	1	64	P0C6A5.1
			VSeo_18a.44.44.2 File:"VSeo_18a.raw", NativeID:"controllerType=0 controllerNumber=1 scan=44"	svMP	PVTCKPR	4,Carbamidomethyl[C];	857.464	2	0.072173	857.466	-0.001742	0.002	0.85407	sp|P81743|VM2AB_ERIMA/sp|P0C6A5|VM2A6_VIPAA/sp|P0C6A7|VM27B_VIPBB/sp|P0C6A8|DID4_MACLO/sp|P83254|DID1B_MACLB/sp|P0C6A6|DID7A_VIPBB/sp|P83253|DID1A_MACLB/	12,D,R/8,D,R/12,D,E/9,D,R/8,D,R/8,D,R/55,D,R/	1	metalloproteinase of class P-II MPII-1 [Vipera ammodytes ammodytes]	Vipera ammodytes ammodytes	26.5	26.5	1	0.58	1	478	AMB36349.1
			VSeo_19a.232.232.2 File:"VSeo_19a.raw", NativeID:"controllerType=0 controllerNumber=1 scan=232"	DI	GDWNDDYCTGISSDCPR	8,Carbamidomethyl[C];15,Carbamidomethyl[C];	2017.75	2	0	2017.76	-0.013975	17.2094	0.000707073	sp|P81743|VM2AB_ERIMA/	46,M,N/	0	eristocophin II [Eristocophis macmahoni=leaf-nosed viper, venom, Peptide, 61 aa] [Eristicophis macmahoni]	Eristicophis macmahoni	61.7	61.7	1	9e-13	1	61	AAB25266.1
			VSeo_19a.161.161.2 File:"VSeo_19a.raw", NativeID:"controllerType=0 controllerNumber=1 scan=161"	DI	QNSGNPCCDPVTCKPR	0,Gln->pyro-Glu[AnyN-termQ];7,Carbamidomethyl[C];8,Carbamidomethyl[C];13,Carbamidomethyl[C];	1872.76	2	0	1872.78	-0.014153	13.3762	0.0011718	sp|P81743|VM2AB_ERIMA/sp|P0C6A7|VM27B_VIPBB/	3,L,R/3,L,E/	1	RecName: Full=Disintegrin VB7B [Vipera berus berus]	Vipera berus berus	57.1	57.1	1	4e-11	1	64	P0C6A7.1
			VSeo_19a.214.214.2 File:"VSeo_19a.raw", NativeID:"controllerType=0 controllerNumber=1 scan=214"	DI	FLNAGTICNR	8,Carbamidomethyl[C];	1165.57	2	0	1165.58	-0.005766	11.8344	0.0058583	sp|P83253|DID1A_MACLB/	77,K,A/	0	RecName: Full=Disintegrin lebein-1-alpha; AltName: Full=ML-3; AltName: Full=MS-II; AltName: Full=Platelet aggregation activation inhibitor; Flags: Precursor [Macrovipera lebetina]	Macrovipera lebetina	35.8	35.8	1	0.0005	1	111	P83253.2
			VSeo_19a.127.127.3 File:"VSeo_19a.raw", NativeID:"controllerType=0 controllerNumber=1 scan=127"	DI	NSGNPCCDPVTCKPR	6,Carbamidomethyl[C];7,Carbamidomethyl[C];12,Carbamidomethyl[C];	1761.74	3	0	1761.75	-0.006558	8.232	0.00995358	sp|P81743|VM2AB_ERIMA/sp|P0C6A7|VM27B_VIPBB/sp|P0C6A8|DID4_MACLO/sp|P83254|DID1B_MACLB/sp|P0C6A6|DID7A_VIPBB/sp|P83253|DID1A_MACLB/	4,Q,R/4,Q,E/1,M,R/0,-,R/0,-,R/47,M,R/	1	RecName: Full=Disintegrin VB7B [Vipera berus berus]	Vipera berus berus	53.7	53.7	1	6e-10	1	64	P0C6A7.1
			VSeo_19a.196.196.3 File:"VSeo_19a.raw", NativeID:"controllerType=0 controllerNumber=1 scan=196"	DI	ELLQNSGNPCCDPVTCKPR	10,Carbamidomethyl[C];11,Carbamidomethyl[C];16,Carbamidomethyl[C];	2245	3	0	2245.02	-0.01088	6.61908	0.0268101	sp|P81743|VM2AB_ERIMA/sp|P0C6A7|VM27B_VIPBB/	0,-,R/0,-,E/	1	RecName: Full=Disintegrin VB7B [Vipera berus berus]	Vipera berus berus	66.4	66.4	1	3e-14	1	64	P0C6A7.1
			VSeo_19a.220.220.2 File:"VSeo_19a.raw", NativeID:"controllerType=0 controllerNumber=1 scan=220"	DI	FLNAGTICNR	3,Deamidated[N];8,Carbamidomethyl[C];	1166.56	2	0	1166.56	-0.000158	9.43218	0.0601663	sp|P83253|DID1A_MACLB/	77,K,A/	0	RecName: Full=Disintegrin lebein-1-alpha; AltName: Full=ML-3; AltName: Full=MS-II; AltName: Full=Platelet aggregation activation inhibitor; Flags: Precursor [Macrovipera lebetina]	Macrovipera lebetina	35.8	35.8	1	0.0005	1	111	P83253.2
			VSeo_19a.175.175.2 File:"VSeo_19a.raw", NativeID:"controllerType=0 controllerNumber=1 scan=175"	DI	AGTVCRIAR	5,Carbamidomethyl[C];6,Arg->Pro[R];	944.493	2	0	944.498	-0.005258	7.84729	0.0944852	sp|P17497|VM2_BITAR/	55,K,G/	1	disintegrin isoform Dc-1 [Bitis arietans]	Bitis arietans	31.2	31.2	1	0.021	1	108	AAY43684.1
			VSeo_19a.215.215.2 File:"VSeo_19a.raw", NativeID:"controllerType=0 controllerNumber=1 scan=215"	svMP	FLNAGTICKKA	9,Lys->Met[K];	1168.58	2	0	1168.59	-0.008427	5.26305	0.104084	sp|P0C6A3|DIDBA_ECHML/sp|P82465|DID6A_ECHCS/	30,K,M/77,K,M/	2	metalloproteinase [Echis carinatus sochureki]	Echis carinatus sochureki	37.5	37.5	1	0.0002	1	128	ADI47727.1
			VSeo_19a.125.125.2 File:"VSeo_19a.raw", NativeID:"controllerType=0 controllerNumber=1 scan=125"	DI	SGNPCCDPVTCKPR	5,Carbamidomethyl[C];6,Carbamidomethyl[C];11,Carbamidomethyl[C];	1647.7	2	0	1647.7	-0.007813	2.80149	0.127154	sp|P81743|VM2AB_ERIMA/sp|P0C6A7|VM27B_VIPBB/sp|P0C6A8|DID4_MACLO/sp|P83254|DID1B_MACLB/sp|P0C6A6|DID7A_VIPBB/sp|P83253|DID1A_MACLB/	5,N,R/5,N,E/2,N,R/1,N,R/1,N,R/48,N,R/	1	metalloproteinase of class P-II MPII-1 [Vipera ammodytes ammodytes]	Vipera ammodytes ammodytes	50.3	71.3	1	9e-09	1	478	AMB36349.1
			VSeo_19a.49.49.3 File:"VSeo_19a.raw", NativeID:"controllerType=0 controllerNumber=1 scan=49"	DI	RGEHCVSGPCCR	5,Carbamidomethyl[C];10,Carbamidomethyl[C];11,Carbamidomethyl[C];	1474.61	3	0	1474.61	-0.000117	8.19361	0.127924	sp|P0C6A5|VM2A6_VIPAA/sp|P0C6A8|DID4_MACLO/sp|P0C6A6|DID7A_VIPBB/sp|P83253|DID1A_MACLB/sp|P0C6B0|DID5B_MACLO/	15,R,N/16,R,N/15,R,N/62,R,N/16,R,N/	1	RecName: Full=Disintegrin lebein-1-alpha; AltName: Full=ML-3; AltName: Full=MS-II; AltName: Full=Platelet aggregation activation inhibitor; Flags: Precursor [Macrovipera lebetina]	Macrovipera lebetina	43.9	43.9	1	1e-06	1	111	P83253.2
			VSeo_19a.191.191.3 File:"VSeo_19a.raw", NativeID:"controllerType=0 controllerNumber=1 scan=191"	DI	RGDDMNDYCTGVTSDCPR	1,Dicarbamidomethyl[R];16,Carbamidomethyl[C];	2175.84	3	0	2175.85	-0.008126	6.66127	0.183201	sp|P0C6A5|VM2A6_VIPAA/	41,A,N/	1	RecName: Full=Disintegrin VA6 [Vipera ammodytes ammodytes]	Vipera ammodytes ammodytes	64.3	64.3	1	1e-13	1	64	P0C6A5.1
			VSeo_19a.149.149.2 File:"VSeo_19a.raw", NativeID:"controllerType=0 controllerNumber=1 scan=149"	DI	NSGNPCCDPVTCKPR	1,Deamidated[N];6,Carbamidomethyl[C];7,Carbamidomethyl[C];12,Carbamidomethyl[C];	1762.72	2	0	1762.73	-0.006674	3.86608	0.208953	sp|P81743|VM2AB_ERIMA/sp|P0C6A7|VM27B_VIPBB/sp|P0C6A8|DID4_MACLO/sp|P83254|DID1B_MACLB/sp|P0C6A6|DID7A_VIPBB/sp|P83253|DID1A_MACLB/	4,Q,R/4,Q,E/1,M,R/0,-,R/0,-,R/47,M,R/	1	RecName: Full=Disintegrin VB7B [Vipera berus berus]	Vipera berus berus	53.7	53.7	1	6e-10	1	64	P0C6A7.1
			VSeo_19a.301.301.2 File:"VSeo_19a.raw", NativeID:"controllerType=0 controllerNumber=1 scan=301"	DI	FLNAGTICR	0,Acetyl[ProteinN-term];8,Carbamidomethyl[C];9,Dicarbamidomethyl[R];	1207.58	2	0	1207.59	-0.004739	6.6489	0.296776	sp|P0C6A5|VM2A6_VIPAA/	30,K,Y/	0	RecName: Full=Disintegrin VA6 [Vipera ammodytes ammodytes]	Vipera ammodytes ammodytes	32.5	32.5	1	0.008	1	64	P0C6A5.1
			VSeo_19a.172.172.3 File:"VSeo_19a.raw", NativeID:"controllerType=0 controllerNumber=1 scan=172"	DI	MGDWNDDYCTGISSDCPR	0,Acetyl[ProteinN-term];5,Deamidated[N];9,Carbamidomethyl[C];16,Carbamidomethyl[C];	2191.84	3	0.18309	2191.8	0.035547	1.2896	0.65446	sp|P81743|VM2AB_ERIMA/	45,A,N/	0	RecName: Full=Disintegrin EMF10B; Short=EMF-10B; AltName: Full=Eristocophin II; AltName: Full=Platelet aggregation activation inhibitor [Eristicophis macmahoni]	Eristicophis macmahoni	41.6	41.6	1	1e-06	1	68	P81743.1
			VSeo_19a.44.44.2 File:"VSeo_19a.raw", NativeID:"controllerType=0 controllerNumber=1 scan=44"	svMP	PVTCKPR	4,Carbamidomethyl[C];	857.466	2	0.27075	857.466	-9.4e-05	0.002	0.738201	sp|P81743|VM2AB_ERIMA/sp|P0C6A5|VM2A6_VIPAA/sp|P0C6A7|VM27B_VIPBB/sp|P0C6A8|DID4_MACLO/sp|P83254|DID1B_MACLB/sp|P0C6A6|DID7A_VIPBB/sp|P83253|DID1A_MACLB/	12,D,R/8,D,R/12,D,E/9,D,R/8,D,R/8,D,R/55,D,R/	1	metalloproteinase of class P-II MPII-1 [Vipera ammodytes ammodytes]	Vipera ammodytes ammodytes	26.5	26.5	1	0.58	1	478	AMB36349.1
			VSeo_19a.206.206.2 File:"VSeo_19a.raw", NativeID:"controllerType=0 controllerNumber=1 scan=206"	DI	DDMNDYCTGVTSDCPR	0,Acetyl[ProteinN-term];4,Deamidated[N];7,Carbamidomethyl[C];14,Carbamidomethyl[C];	1948.7	2	0.32992	1948.7	0.000464	2.67056	0.770069	sp|P0C6A5|VM2A6_VIPAA/	43,G,N/	0	RecName: Full=Disintegrin VA6 [Vipera ammodytes ammodytes]	Vipera ammodytes ammodytes	58.3	58.3	1	2e-11	1	64	P0C6A5.1
			VSeo_19a.185.185.2 File:"VSeo_19a.raw", NativeID:"controllerType=0 controllerNumber=1 scan=185"	svMP	DPVTCKPK	5,Carbamidomethyl[C];	944.495	2	0.32992	944.487	0.008167	0.002	0.803881	sp|Q6T271|VM2BI_BITGA/sp|P82466|VM26B_ECHCS/sp|Q6T6T2|DID2_BITGA/sp|P83043|DID8A_CERCE/sp|Q3BK16|DIDA_CERVI/sp|M5BGS2|DID_ATHSQ/sp|P83041|DID5_CERCE/sp|Q3BK15|DIDB_CERVI/sp|M5BGY5|DID_ATHCH/sp|Q6T6T3|DID1_BITGA/sp|P83044|DID8B_CERCE/sp|M5BHN0|DID_ATHNI/	265,C,A/7,C,R/54,C,R/8,C,R/54,C,R/54,C,K/8,C,R/7,C,R/54,C,K/54,C,R/7,C,R/54,C,K/	1	metalloproteinase [Echis carinatus sochureki]	Echis carinatus sochureki	29.5	29.5	1	0.064	1	474	ADI47723.1
			VSeo_19a.184.184.2 File:"VSeo_19a.raw", NativeID:"controllerType=0 controllerNumber=1 scan=184"	DI	GDDMNDYCTGVTSDCPR	0,Acetyl[ProteinN-term];4,Oxidation[M];5,Deamidated[N];15,Carbamidomethyl[C];	1964.69	2	0.50241	1964.69	-0.000309	2.591	0.982479	sp|P0C6A5|VM2A6_VIPAA/	42,R,N/	0	RecName: Full=Disintegrin VA6 [Vipera ammodytes ammodytes]	Vipera ammodytes ammodytes	60.9	60.9	1	2e-12	1	64	P0C6A5.1
			VSeo_20a.231.231.2 File:"VSeo_20a.raw", NativeID:"controllerType=0 controllerNumber=1 scan=231"	DI	GDWNDDYCTGISSDCPR	8,Carbamidomethyl[C];15,Carbamidomethyl[C];	2017.75	2	0	2017.76	-0.013975	18.5322	0.00459729	sp|P81743|VM2AB_ERIMA/	46,M,N/	0	eristocophin II [Eristocophis macmahoni=leaf-nosed viper, venom, Peptide, 61 aa] [Eristicophis macmahoni]	Eristicophis macmahoni	61.7	61.7	1	9e-13	1	61	AAB25266.1
			VSeo_20a.162.162.2 File:"VSeo_20a.raw", NativeID:"controllerType=0 controllerNumber=1 scan=162"	DI	QNSGNPCCDPVTCKPR	0,Gln->pyro-Glu[AnyN-termQ];7,Carbamidomethyl[C];8,Carbamidomethyl[C];13,Carbamidomethyl[C];	1872.76	2	0	1872.78	-0.014763	13.2501	0.0312539	sp|P81743|VM2AB_ERIMA/sp|P0C6A7|VM27B_VIPBB/	3,L,R/3,L,E/	1	RecName: Full=Disintegrin VB7B [Vipera berus berus]	Vipera berus berus	57.1	57.1	1	4e-11	1	64	P0C6A7.1
			VSeo_20a.210.210.2 File:"VSeo_20a.raw", NativeID:"controllerType=0 controllerNumber=1 scan=210"	DI	FLNAGTICNR	8,Carbamidomethyl[C];	1165.57	2	0	1165.58	-0.005521	12.5485	0.0362421	sp|P83253|DID1A_MACLB/	77,K,A/	0	RecName: Full=Disintegrin lebein-1-alpha; AltName: Full=ML-3; AltName: Full=MS-II; AltName: Full=Platelet aggregation activation inhibitor; Flags: Precursor [Macrovipera lebetina]	Macrovipera lebetina	35.8	35.8	1	0.0005	1	111	P83253.2
			VSeo_20a.192.192.3 File:"VSeo_20a.raw", NativeID:"controllerType=0 controllerNumber=1 scan=192"	DI	ARGDDMNDYCTGISSDCPR	11,Carbamyl[T];17,Carbamidomethyl[C];	2175.84	3	0	2175.85	-0.010504	17.2905	0.0427809	sp|P83043|DID8A_CERCE/sp|P83254|DID1B_MACLB/sp|P0C6A6|DID7A_VIPBB/sp|P83041|DID5_CERCE/sp|Q3BK15|DIDB_CERVI/sp|P83253|DID1A_MACLB/	41,K,N/40,R,N/40,Y,N/41,K,N/40,K,N/87,R,N/	1	RecName: Full=Disintegrin VB7A [Vipera berus berus]	Vipera berus berus	66.8	66.8	1	2e-14	1	64	P0C6A6.1
			VSeo_20a.129.129.2 File:"VSeo_20a.raw", NativeID:"controllerType=0 controllerNumber=1 scan=129"	DI	NSGNPCCDPVTCKPR	6,Carbamidomethyl[C];7,Carbamidomethyl[C];12,Carbamidomethyl[C];	1761.74	2	0	1761.75	-0.010573	8.68281	0.107402	sp|P81743|VM2AB_ERIMA/sp|P0C6A7|VM27B_VIPBB/sp|P0C6A8|DID4_MACLO/sp|P83254|DID1B_MACLB/sp|P0C6A6|DID7A_VIPBB/sp|P83253|DID1A_MACLB/	4,Q,R/4,Q,E/1,M,R/0,-,R/0,-,R/47,M,R/	1	RecName: Full=Disintegrin VB7B [Vipera berus berus]	Vipera berus berus	53.7	53.7	1	6e-10	1	64	P0C6A7.1
			VSeo_20a.198.198.3 File:"VSeo_20a.raw", NativeID:"controllerType=0 controllerNumber=1 scan=198"	DI	ELLQNSGNPCCDPVTCKPR	10,Carbamidomethyl[C];11,Carbamidomethyl[C];16,Carbamidomethyl[C];	2245.01	3	0	2245.02	-0.008866	6.34279	0.157601	sp|P81743|VM2AB_ERIMA/sp|P0C6A7|VM27B_VIPBB/	0,-,R/0,-,E/	1	RecName: Full=Disintegrin VB7B [Vipera berus berus]	Vipera berus berus	66.4	66.4	1	3e-14	1	64	P0C6A7.1
			VSeo_20a.135.135.3 File:"VSeo_20a.raw", NativeID:"controllerType=0 controllerNumber=1 scan=135"	svMP	RGEHCISGPCCRNC	10,Carbamidomethyl[C];11,Carbamidomethyl[C];14,2-dimethylsuccinyl[C];	1792.67	3	0	1792.7	-0.023843	8.53409	0.157945	sp|Q6T6T2|DID2_BITGA/sp|P83043|DID8A_CERCE/sp|Q3BK16|DIDA_CERVI/sp|Q3BER2|DID1_ECHOC/sp|P83041|DID5_CERCE/sp|Q3BK15|DIDB_CERVI/sp|Q6T6T3|DID1_BITGA/	62,K,K/16,K,K/62,K,K/62,K,K/16,K,K/15,K,K/62,K,K/	2	metalloproteinase of class P-II MPII-3 [Vipera ammodytes ammodytes]	Vipera ammodytes ammodytes	35	35	0.92	0.001	0.9231	478	AMB36351.1
			VSeo_20a.177.177.2 File:"VSeo_20a.raw", NativeID:"controllerType=0 controllerNumber=1 scan=177"	DI	AGTVCRIAR	5,Carbamidomethyl[C];6,Arg->Pro[R];	944.492	2	0	944.498	-0.006113	6.33395	0.244569	sp|P17497|VM2_BITAR/	55,K,G/	1	disintegrin isoform Dc-1 [Bitis arietans]	Bitis arietans	31.2	31.2	1	0.021	1	108	AAY43684.1
			VSeo_20a.276.276.2 File:"VSeo_20a.raw", NativeID:"controllerType=0 controllerNumber=1 scan=276"	DI	AMLDGLNDYCTGISSDCPR	10,Carbamidomethyl[C];17,Carbamidomethyl[C];	2144.9	2	0	2144.9	-0.008903	2.99061	0.260591	sp|P0C6A3|DIDBA_ECHML/sp|P82465|DID6A_ECHCS/	40,K,N/87,K,N/	0	RecName: Full=Disintegrin EMS11A [Echis multisquamatus]	Echis multisquamatus	66	66	1	4e-14	1	68	P0C6A3.1
			VSeo_20a.124.124.2 File:"VSeo_20a.raw", NativeID:"controllerType=0 controllerNumber=1 scan=124"	DI	SGNPCCDPVTCKPR	5,Carbamidomethyl[C];6,Carbamidomethyl[C];11,Carbamidomethyl[C];	1647.7	2	0	1647.7	-0.007446	2.86397	0.279438	sp|P81743|VM2AB_ERIMA/sp|P0C6A7|VM27B_VIPBB/sp|P0C6A8|DID4_MACLO/sp|P83254|DID1B_MACLB/sp|P0C6A6|DID7A_VIPBB/sp|P83253|DID1A_MACLB/	5,N,R/5,N,E/2,N,R/1,N,R/1,N,R/48,N,R/	1	metalloproteinase of class P-II MPII-1 [Vipera ammodytes ammodytes]	Vipera ammodytes ammodytes	50.3	71.3	1	9e-09	1	478	AMB36349.1
			VSeo_20a.50.50.3 File:"VSeo_20a.raw", NativeID:"controllerType=0 controllerNumber=1 scan=50"	DI	RGEHCVSGPCCR	5,Carbamidomethyl[C];10,Carbamidomethyl[C];11,Carbamidomethyl[C];	1474.61	3	0	1474.61	-0.004328	4.69988	0.299567	sp|P0C6A5|VM2A6_VIPAA/sp|P0C6A8|DID4_MACLO/sp|P0C6A6|DID7A_VIPBB/sp|P83253|DID1A_MACLB/sp|P0C6B0|DID5B_MACLO/	15,R,N/16,R,N/15,R,N/62,R,N/16,R,N/	1	RecName: Full=Disintegrin lebein-1-alpha; AltName: Full=ML-3; AltName: Full=MS-II; AltName: Full=Platelet aggregation activation inhibitor; Flags: Precursor [Macrovipera lebetina]	Macrovipera lebetina	43.9	43.9	1	1e-06	1	111	P83253.2
			VSeo_20a.258.258.3 File:"VSeo_20a.raw", NativeID:"controllerType=0 controllerNumber=1 scan=258"	DI	SGNPCCDPVTCKPRRGWHCVSNPCCDNCK	0,Acetyl[ProteinN-term];5,Carbamidomethyl[C];10,Carbamyl[T];17,Trp->Arg[W];	3291.32	3	0	3291.36	-0.03278	1.00202	0.300465	sp|P83254|DID1B_MACLB/	1,N,F/	3	RecName: Full=Disintegrin lebein-1-beta; AltName: Full=MS-II; AltName: Full=Platelet aggregation activation inhibitor [Macrovipera lebetina]	Macrovipera lebetina	62	62	1	2e-14	1	64	P83254.1
			VSeo_20a.271.271.3 File:"VSeo_20a.raw", NativeID:"controllerType=0 controllerNumber=1 scan=271"	DI	GNPCCDPVTCKPRRGWHCVSNPCCDNCK	0,Acetyl[ProteinN-term];4,Carbamidomethyl[C];5,Carbamidomethyl[C];10,Carbamidomethyl[C];16,Trp->Arg[W];	3275.32	3	0	3275.36	-0.038357	0.017485	0.386981	sp|P83254|DID1B_MACLB/	2,S,F/	3	RecName: Full=Disintegrin lebein-1-beta; AltName: Full=MS-II; AltName: Full=Platelet aggregation activation inhibitor [Macrovipera lebetina]	Macrovipera lebetina	60.5	60.5	1	7e-14	1	64	P83254.1
			VSeo_20a.29.29.7 File:"VSeo_20a.raw", NativeID:"controllerType=0 controllerNumber=1 scan=29"	DI	LAVFPYQGSSIILESGNVNDYEIVYPKKVTVLPTGAMNSGNPCCDPVTCKPR	30,Carbamyl[T];43,Carbamidomethyl[C];	5684.77	7	0	5684.79	-0.023121	0.00521	0.401208	sp|P83253|DID1A_MACLB/	10,C,R/	3	RecName: Full=Disintegrin lebein-1-alpha; AltName: Full=ML-3; AltName: Full=MS-II; AltName: Full=Platelet aggregation activation inhibitor; Flags: Precursor [Macrovipera lebetina]	Macrovipera lebetina	108	108	1	9e-32	1	111	P83253.2
			VSeo_20a.132.132.2 File:"VSeo_20a.raw", NativeID:"controllerType=0 controllerNumber=1 scan=132"	svMP	EGEHCISGPCCRNCK	0,Acetyl[ProteinN-term];5,Carbamidomethyl[C];13,Deamidated[N];14,Carbamidomethyl[C];	1792.68	2	0.094745	1792.69	-0.010336	1.50438	0.612865	sp|P0C6A7|VM27B_VIPBB/sp|P81631|VM23B_ECHCA/sp|P0C6A3|DIDBA_ECHML/sp|P82465|DID6A_ECHCS/sp|Q5EE07|DID_ECHCA/	19,R,F/15,R,F/15,R,F/62,R,F/15,R,F/	1	metalloproteinase [Echis coloratus]	Echis coloratus	36.2	36.2	1	0.0004	1	128	ADI47717.1
			VSeo_20a.145.145.3 File:"VSeo_20a.raw", NativeID:"controllerType=0 controllerNumber=1 scan=145"	DI	RGEHCVSGPCCRNCK	5,Carbamidomethyl[C];10,Carbamidomethyl[C];	1762.73	3	0.15982	1762.74	-0.007791	0.95107	0.624494	sp|P0C6A5|VM2A6_VIPAA/sp|P0C6A8|DID4_MACLO/sp|P0C6A6|DID7A_VIPBB/sp|P83253|DID1A_MACLB/sp|P0C6B0|DID5B_MACLO/	15,R,F/16,R,F/15,R,F/62,R,F/16,R,F/	2	RecName: Full=Disintegrin VLO4 [Macrovipera lebetina obtusa]	Macrovipera lebetina obtusa	54.5	54.5	1	3e-10	1	65	P0C6A8.1
			VSeo_20a.42.42.2 File:"VSeo_20a.raw", NativeID:"controllerType=0 controllerNumber=1 scan=42"	svMP	PVTCKPR	4,Carbamidomethyl[C];	857.466	2	0.39887	857.466	-0.000399	0.968101	0.827781	sp|P81743|VM2AB_ERIMA/sp|P0C6A5|VM2A6_VIPAA/sp|P0C6A7|VM27B_VIPBB/sp|P0C6A8|DID4_MACLO/sp|P83254|DID1B_MACLB/sp|P0C6A6|DID7A_VIPBB/sp|P83253|DID1A_MACLB/	12,D,R/8,D,R/12,D,E/9,D,R/8,D,R/8,D,R/55,D,R/	1	metalloproteinase of class P-II MPII-1 [Vipera ammodytes ammodytes]	Vipera ammodytes ammodytes	26.5	26.5	1	0.58	1	478	AMB36349.1
			VSeo_20a.168.168.2 File:"VSeo_20a.raw", NativeID:"controllerType=0 controllerNumber=1 scan=168"	PLA2	KPKDGTDR		916.49	2	0.46393	916.485	0.005656	0.003	0.899496	sp|Q8UVZ7|PA2H_CROAT/sp|P14421|PA2N_GLOHA/sp|P0C616|PA2HA_BOTAS/sp|P0C8M1|PA2B1_BOTMO/	50,H,C/34,G,C/50,H,C/35,E,C/	2	phospholipase A2 [Crotalus atrox]	Crotalus atrox	28.2	28.2	1	0.19	1	164	QBA85153.1
			VSeo_21a22a23b.241.241.3 File:"VSeo_21a22a23b.raw", NativeID:"controllerType=0 controllerNumber=1 scan=241"	VEGF	VRPFLEVHER	0,unknown[196.085 Da][111][ProteinN-term];	1392.73	3	0	1392.74	-0.00562	15.8097	0.00133066	sp|P83942|TXVE_VIPAP/sp|P67863|TXVE_VIPAA/	1,Q,S/25,Q,S/	1	vammin-1' [Vipera ammodytes ammodytes]	Vipera ammodytes ammodytes	36.7	36.7	1	0.0003	1	145	APB93447.1
			VSeo_21a22a23b.196.196.3 File:"VSeo_21a22a23b.raw", NativeID:"controllerType=0 controllerNumber=1 scan=196"	VEGF	PFLEVHER		1026.53	3	0	1026.54	-0.002292	8.02755	0.0159305	sp|P83942|TXVE_VIPAP/sp|P67863|TXVE_VIPAA/	3,R,S/27,R,S/	0	vammin-1' [Vipera ammodytes ammodytes]	Vipera ammodytes ammodytes	30.3	30.3	1	0.031	1	145	APB93447.1
			VSeo_21a22a23b.223.223.2 File:"VSeo_21a22a23b.raw", NativeID:"controllerType=0 controllerNumber=1 scan=223"	VEGF	HTVDLQIMR		1112.58	2	0	1112.59	-0.008398	5.50146	0.0334158	sp|P83942|TXVE_VIPAP/sp|P67863|TXVE_VIPAA/	61,K,V/85,K,V/	0	vammin-1' [Vipera ammodytes ammodytes]	Vipera ammodytes ammodytes	34.1	34.1	1	0.002	1	145	APB93447.1
			VSeo_21a22a23b.184.184.2 File:"VSeo_21a22a23b.raw", NativeID:"controllerType=0 controllerNumber=1 scan=184"	VEGF	HTVDLQIMR	8,Oxidation[M];	1128.57	2	0	1128.58	-0.008196	6.64082	0.058348	sp|P83942|TXVE_VIPAP/sp|P67863|TXVE_VIPAA/	61,K,V/85,K,V/	0	vammin-1' [Vipera ammodytes ammodytes]	Vipera ammodytes ammodytes	34.1	34.1	1	0.002	1	145	APB93447.1
			VSeo_21a22a23b.69.69.3 File:"VSeo_21a22a23b.raw", NativeID:"controllerType=0 controllerNumber=1 scan=69"	VEGF	FTEHTACECRPR	7,Carbamidomethyl[C];9,Carbamidomethyl[C];	1563.67	3	0	1563.68	-0.005239	4.62966	0.166618	sp|P83942|TXVE_VIPAP/sp|P67863|TXVE_VIPAA/sp|P82475|TXVE2_MACLB/	84,K,R/108,K,R/84,K,R/	1	vammin-1' [Vipera ammodytes ammodytes]	Vipera ammodytes ammodytes	44.8	44.8	1	5e-07	1	145	APB93447.1
			VSeo_21a22a23b.93.93.2 File:"VSeo_21a22a23b.raw", NativeID:"controllerType=0 controllerNumber=1 scan=93"	VEGF	CSGCCTDESLK	1,Carbamidomethyl[C];4,Carbamidomethyl[C];5,Carbamidomethyl[C];	1316.48	2	0	1316.49	-0.008539	1.00798	0.231986	sp|P83942|TXVE_VIPAP/sp|P67863|TXVE_VIPAA/sp|P82475|TXVE2_MACLB/	44,R,C/68,R,C/44,R,C/	0	vammin-1' [Vipera ammodytes ammodytes]	Vipera ammodytes ammodytes	39.2	39.2	1	4e-05	1	145	APB93447.1
			VSeo_21b.205.205.2 File:"VSeo_21b.raw", NativeID:"controllerType=0 controllerNumber=1 scan=205"	DI	FLNAGTICNR	8,Carbamidomethyl[C];	1165.57	2	0	1165.58	-0.007108	11.7435	0.5	sp|P83253|DID1A_MACLB/	77,K,A/	0	RecName: Full=Disintegrin lebein-1-alpha; AltName: Full=ML-3; AltName: Full=MS-II; AltName: Full=Platelet aggregation activation inhibitor; Flags: Precursor [Macrovipera lebetina]	Macrovipera lebetina	35.8	35.8	1	0.0005	1	111	P83253.2
			VSeo_21b.235.235.3 File:"VSeo_21b.raw", NativeID:"controllerType=0 controllerNumber=1 scan=235"	DI	FLNAGTICNRAR	8,Carbamidomethyl[C];	1392.73	3	0	1392.72	0.017171	0.002	0.5	sp|P83253|DID1A_MACLB/	77,K,G/	1	RecName: Full=Disintegrin lebein-1-alpha; AltName: Full=ML-3; AltName: Full=MS-II; AltName: Full=Platelet aggregation activation inhibitor; Flags: Precursor [Macrovipera lebetina]	Macrovipera lebetina	41.8	41.8	1	7e-06	1	111	P83253.2
			VSeo_22b.198.198.2 File:"VSeo_22b.raw", NativeID:"controllerType=0 controllerNumber=1 scan=198"	DI	FLNAGTICNR	8,Carbamidomethyl[C];	1165.57	2	0	1165.58	-0.006498	10.2778	0.5	sp|P83253|DID1A_MACLB/	77,K,A/	0	RecName: Full=Disintegrin lebein-1-alpha; AltName: Full=ML-3; AltName: Full=MS-II; AltName: Full=Platelet aggregation activation inhibitor; Flags: Precursor [Macrovipera lebetina]	Macrovipera lebetina	35.8	35.8	1	0.0005	1	111	P83253.2
			VSeo_22b.228.228.3 File:"VSeo_22b.raw", NativeID:"controllerType=0 controllerNumber=1 scan=228"	DI	FLNAGTICNRAR	8,Carbamidomethyl[C];	1392.73	3	0	1392.72	0.014974	0.002	0.5	sp|P83253|DID1A_MACLB/	77,K,G/	1	RecName: Full=Disintegrin lebein-1-alpha; AltName: Full=ML-3; AltName: Full=MS-II; AltName: Full=Platelet aggregation activation inhibitor; Flags: Precursor [Macrovipera lebetina]	Macrovipera lebetina	41.8	41.8	1	7e-06	1	111	P83253.2
			VSeo_22c.245.245.2 File:"VSeo_22c.raw", NativeID:"controllerType=0 controllerNumber=1 scan=245"	DI	KGDWMNNYCTGISSDCPR	9,Carbamidomethyl[C];16,Carbamidomethyl[C];	2160.88	2	0	2160.89	-0.006619	12.7431	0.000837869	sp|P0C6A7|VM27B_VIPBB/	45,A,N/	1	RecName: Full=Disintegrin VB7B [Vipera berus berus]	Vipera berus berus	66	66	1	3e-14	1	64	P0C6A7.1
			VSeo_22c.206.206.2 File:"VSeo_22c.raw", NativeID:"controllerType=0 controllerNumber=1 scan=206"	DI	FLNAGTICNR	8,Carbamidomethyl[C];	1165.57	2	0	1165.58	-0.006376	8.14706	0.00213974	sp|P83253|DID1A_MACLB/	77,K,A/	0	RecName: Full=Disintegrin lebein-1-alpha; AltName: Full=ML-3; AltName: Full=MS-II; AltName: Full=Platelet aggregation activation inhibitor; Flags: Precursor [Macrovipera lebetina]	Macrovipera lebetina	35.8	35.8	1	0.0005	1	111	P83253.2
			VSeo_22c.155.155.2 File:"VSeo_22c.raw", NativeID:"controllerType=0 controllerNumber=1 scan=155"	DI	QNSGNPCCDPVTCKPR	0,Gln->pyro-Glu[AnyN-termQ];7,Carbamidomethyl[C];8,Carbamidomethyl[C];13,Carbamidomethyl[C];	1872.77	2	0	1872.78	-0.01281	5.14897	0.0132861	sp|P81743|VM2AB_ERIMA/sp|P0C6A7|VM27B_VIPBB/	3,L,R/3,L,E/	1	RecName: Full=Disintegrin VB7B [Vipera berus berus]	Vipera berus berus	57.1	57.1	1	4e-11	1	64	P0C6A7.1
			VSeo_22c.227.227.2 File:"VSeo_22c.raw", NativeID:"controllerType=0 controllerNumber=1 scan=227"	DI	DWMNNYCTGISSDCPR	0,Acetyl[ProteinN-term];7,Carbamidomethyl[C];14,Carbamidomethyl[C];	2017.75	2	0	2017.78	-0.030039	1.27407	0.0633005	sp|P0C6A7|VM27B_VIPBB/	47,G,N/	0	RecName: Full=Disintegrin VB7B [Vipera berus berus]	Vipera berus berus	38.5	38.5	1	2e-05	1	64	P0C6A7.1
			VSeo_22c.147.147.2 File:"VSeo_22c.raw", NativeID:"controllerType=0 controllerNumber=1 scan=147"	DI	NSGNPCCDPVTCKPR	6,Carbamidomethyl[C];7,Carbamidomethyl[C];12,Carbamidomethyl[C];	1761.76	2	0	1761.75	0.015672	2.20253	0.108544	sp|P81743|VM2AB_ERIMA/sp|P0C6A7|VM27B_VIPBB/sp|P0C6A8|DID4_MACLO/sp|P83254|DID1B_MACLB/sp|P0C6A6|DID7A_VIPBB/sp|P83253|DID1A_MACLB/	4,Q,R/4,Q,E/1,M,R/0,-,R/0,-,R/47,M,R/	1	RecName: Full=Disintegrin VB7B [Vipera berus berus]	Vipera berus berus	53.7	53.7	1	6e-10	1	64	P0C6A7.1
			VSeo_22c.152.152.3 File:"VSeo_22c.raw", NativeID:"controllerType=0 controllerNumber=1 scan=152"	DI	MNSGNPCCDPVTCKPR	1,Oxidation[M];7,Carbamidomethyl[C];8,Carbamidomethyl[C];13,Carbamidomethyl[C];	1908.8	3	0	1908.78	0.014444	1.9747	0.14992	sp|P0C6A8|DID4_MACLO/sp|P83253|DID1A_MACLB/	0,-,R/46,A,R/	1	RecName: Full=Disintegrin VLO4 [Macrovipera lebetina obtusa]	Macrovipera lebetina obtusa	58.3	58.3	1	2e-11	1	65	P0C6A8.1
			VSeo_22c.257.257.2 File:"VSeo_22c.raw", NativeID:"controllerType=0 controllerNumber=1 scan=257"	DI	KGDWMNNYCTGISSDCPRN	0,Acetyl[ProteinN-term];	2202.9	2	0	2202.9	-0.002773	1.84934	0.165887	sp|P0C6A7|VM27B_VIPBB/	45,A,-/	2	RecName: Full=Disintegrin VB7B [Vipera berus berus]	Vipera berus berus	69.4	69.4	1	2e-15	1	64	P0C6A7.1
			VSeo_22c.431.431.6 File:"VSeo_22c.raw", NativeID:"controllerType=0 controllerNumber=1 scan=431"	DI	PREGEHCISGPCCRNCK	0,Acetyl[ProteinN-term];7,Carbamidomethyl[C];12,Carbamidomethyl[C];13,Carbamidomethyl[C];	2101.86	6	0	2101.88	-0.017188	0.002138	0.169079	sp|P0C6A7|VM27B_VIPBB/sp|P81631|VM23B_ECHCA/sp|P0C6A3|DIDBA_ECHML/sp|P82465|DID6A_ECHCS/sp|Q5EE07|DID_ECHCA/	17,K,F/13,E,F/13,E,F/60,E,F/13,E,F/	2	RecName: Full=Disintegrin EC6 subunit alpha; Short=EC6A; Flags: Precursor [Echis carinatus sochureki]	Echis carinatus sochureki	40.4	40.4	1	9e-06	1	115	P82465.2
			VSeo_22c.496.496.10 File:"VSeo_22c.raw", NativeID:"controllerType=0 controllerNumber=1 scan=496"	DI	NSGNPCCDPVTCKPRRGEHCVSGPCCR	0,Acetyl[ProteinN-term];1,Deamidated[N];6,Carbamidomethyl[C];7,Carbamidomethyl[C];12,Carbamidomethyl[C];20,Carbamidomethyl[C];26,Carbamidomethyl[C];	3203.35	10	0	3203.31	0.042927	1.00318	0.183372	sp|P0C6A8|DID4_MACLO/sp|P0C6A6|DID7A_VIPBB/sp|P83253|DID1A_MACLB/	1,M,N/0,-,N/47,M,N/	3	lebein alpha [Macrovipera lebetina]	Macrovipera lebetina	59.7	59.7	1	4e-13	1	111	ABC00778.1
			VSeo_22c.490.490.14 File:"VSeo_22c.raw", NativeID:"controllerType=0 controllerNumber=1 scan=490"	DI	SIILESGNVNDYEIVYPKKVTVLPTGAMNSGNPCCDPVTCKPR	35,Carbamidomethyl[C];40,Carbamidomethyl[C];	4736.41	14	0	4736.32	0.088679	0.919262	0.254645	sp|P83253|DID1A_MACLB/	19,S,R/	3	RecName: Full=Disintegrin lebein-1-alpha; AltName: Full=ML-3; AltName: Full=MS-II; AltName: Full=Platelet aggregation activation inhibitor; Flags: Precursor [Macrovipera lebetina]	Macrovipera lebetina	89.4	89.4	1	2e-24	1	111	P83253.2
			VSeo_22c.171.171.3 File:"VSeo_22c.raw", NativeID:"controllerType=0 controllerNumber=1 scan=171"	DI	PTGAMNSGNPCCDPVTCK	0,Acetyl[ProteinN-term];11,Carbamidomethyl[C];12,Carbamidomethyl[C];	1950.81	3	0	1950.78	0.028482	0.006443	0.279355	sp|P83253|DID1A_MACLB/	42,L,P/	0	lebein alpha [Macrovipera lebetina]	Macrovipera lebetina	40.8	40.8	1	6e-06	1	111	ABC00778.1
			VSeo_22c.73.73.3 File:"VSeo_22c.raw", NativeID:"controllerType=0 controllerNumber=1 scan=73"	DI	MNSGNPCCDPVTCK		1468.59	3	0	1468.57	0.018263	0.003	0.309595	sp|P0C6A8|DID4_MACLO/sp|P83253|DID1A_MACLB/	0,-,P/46,A,P/	0	lebein alpha [Macrovipera lebetina]	Macrovipera lebetina	33.1	33.1	1	0.004	1	111	ABC00778.1
			VSeo_23d.239.239.2 File:"VSeo_23d.raw", NativeID:"controllerType=0 controllerNumber=1 scan=239"	DI	KGDWMNNYCTGISSDCPR	9,Carbamidomethyl[C];16,Carbamidomethyl[C];	2160.89	2	0	2160.89	-0.004177	8.9202	0.000161341	sp|P0C6A7|VM27B_VIPBB/	45,A,N/	1	RecName: Full=Disintegrin VB7B [Vipera berus berus]	Vipera berus berus	66	66	1	3e-14	1	64	P0C6A7.1
			VSeo_23d.266.266.2 File:"VSeo_23d.raw", NativeID:"controllerType=0 controllerNumber=1 scan=266"	DI	AMLDGLNDYCTGISSDCPR	10,Carbamidomethyl[C];17,Carbamidomethyl[C];	2144.89	2	0	2144.9	-0.012566	10.3116	0.00400938	sp|P0C6A3|DIDBA_ECHML/sp|P82465|DID6A_ECHCS/	40,K,N/87,K,N/	0	RecName: Full=Disintegrin EMS11A [Echis multisquamatus]	Echis multisquamatus	66	66	1	4e-14	1	68	P0C6A3.1
			VSeo_23d.152.152.2 File:"VSeo_23d.raw", NativeID:"controllerType=0 controllerNumber=1 scan=152"	DI	QNSGNPCCDPVTCKPR	0,Gln->pyro-Glu[AnyN-termQ];7,Carbamidomethyl[C];8,Carbamidomethyl[C];13,Carbamidomethyl[C];	1872.77	2	0	1872.78	-0.01159	4.12165	0.0125362	sp|P81743|VM2AB_ERIMA/sp|P0C6A7|VM27B_VIPBB/	3,L,R/3,L,E/	1	RecName: Full=Disintegrin VB7B [Vipera berus berus]	Vipera berus berus	57.1	57.1	1	4e-11	1	64	P0C6A7.1
			VSeo_23d.143.143.3 File:"VSeo_23d.raw", NativeID:"controllerType=0 controllerNumber=1 scan=143"	DI	NSGNPCCDPVTCKPR	6,Carbamidomethyl[C];7,Carbamidomethyl[C];12,Carbamidomethyl[C];	1761.76	3	0	1761.75	0.014316	2.20691	0.0260516	sp|P81743|VM2AB_ERIMA/sp|P0C6A7|VM27B_VIPBB/sp|P0C6A8|DID4_MACLO/sp|P83254|DID1B_MACLB/sp|P0C6A6|DID7A_VIPBB/sp|P83253|DID1A_MACLB/	4,Q,R/4,Q,E/1,M,R/0,-,R/0,-,R/47,M,R/	1	RecName: Full=Disintegrin VB7B [Vipera berus berus]	Vipera berus berus	53.7	53.7	1	6e-10	1	64	P0C6A7.1
			VSeo_23d.233.233.4 File:"VSeo_23d.raw", NativeID:"controllerType=0 controllerNumber=1 scan=233"	DI	LQNSGNPCCDPVTCKPREGEHCISGPCCR	3,Deamidated[N];9,Carbamidomethyl[C];14,Carbamidomethyl[C];22,Carbamidomethyl[C];28,Carbamidomethyl[C];	3332.35	4	0	3332.38	-0.025156	0.000163	0.0341446	sp|P0C6A7|VM27B_VIPBB/	2,L,N/	2	RecName: Full=Disintegrin VB7B [Vipera berus berus]	Vipera berus berus	101	101	1	1e-26	1	64	P0C6A7.1
			VSeo_23d.281.281.2 File:"VSeo_23d.raw", NativeID:"controllerType=0 controllerNumber=1 scan=281"	DI	PVTCEPREGEHCISGPCCR	12,Carbamidomethyl[C];18,Carbamidomethyl[C];	2186.9	2	0	2186.92	-0.020755	0.001	0.0848984	sp|P82465|DID6A_ECHCS/	55,D,N/	1	metalloproteinase [Echis carinatus sochureki]	Echis carinatus sochureki	68.1	68.1	1	1e-14	1	128	ADI47727.1
			VSeo_23d.224.224.3 File:"VSeo_23d.raw", NativeID:"controllerType=0 controllerNumber=1 scan=224"	DI	AMLDGLNDYCTGISSDCPRNR	2,Oxidation[M];10,Carbamidomethyl[C];19,Arg->Val[R];	2316.99	3	0	2316.99	0.000971	0.013864	0.0882276	sp|P0C6A3|DIDBA_ECHML/sp|P82465|DID6A_ECHCS/	40,K,Y/87,K,Y/	1	RecName: Full=Disintegrin EMS11A [Echis multisquamatus]	Echis multisquamatus	72.7	72.7	1	2e-16	1	68	P0C6A3.1
			VSeo_23d.246.246.2 File:"VSeo_23d.raw", NativeID:"controllerType=0 controllerNumber=1 scan=246"	DI	AMLDGLNDYCTGISSDCPR	0,Acetyl[ProteinN-term];7,Deamidated[N];10,Carbamidomethyl[C];17,Carbamidomethyl[C];	2187.9	2	0	2187.9	-0.002996	4.18679	0.147222	sp|P0C6A3|DIDBA_ECHML/sp|P82465|DID6A_ECHCS/	40,K,N/87,K,N/	0	RecName: Full=Disintegrin EMS11A [Echis multisquamatus]	Echis multisquamatus	66	66	1	4e-14	1	68	P0C6A3.1
			VSeo_23d.49.49.4 File:"VSeo_23d.raw", NativeID:"controllerType=0 controllerNumber=1 scan=49"	DI	REGEHCISGPCCR		1446.6	4	0	1446.6	-0.001238	0.716097	0.190476	sp|P0C6A7|VM27B_VIPBB/sp|P81630|VM23A_ECHCA/sp|P81631|VM23B_ECHCA/sp|P0C6A3|DIDBA_ECHML/sp|P82465|DID6A_ECHCS/sp|Q5EE07|DID_ECHCA/	18,P,N/14,P,N/14,P,N/14,P,N/61,P,N/14,P,N/	1	RGD-containing dimeric disintegrin EO4A subunit precursor [Echis ocellatus]	Echis ocellatus	40.9	40.9	1	1e-05	1	128	CAJ40965.1
			VSeo_23d.228.228.3 File:"VSeo_23d.raw", NativeID:"controllerType=0 controllerNumber=1 scan=228"	svMP	DPVTCEPREGEHCISGPCCR	0,Acetyl[ProteinN-term];	2229.91	3	0	2229.91	-0.005212	0.002	0.247929	sp|P82465|DID6A_ECHCS/	54,C,N/	1	metalloproteinase [Echis carinatus sochureki]	Echis carinatus sochureki	71.5	71.5	1	1e-15	1	128	ADI47727.1
			VSeo_23d.230.230.4 File:"VSeo_23d.raw", NativeID:"controllerType=0 controllerNumber=1 scan=230"	DI	LLQNSGNPCCDPVTCKPREGEHCISGPCCR	4,Deamidated[N];7,Deamidated[N];9,Carbamidomethyl[C];10,Carbamidomethyl[C];	3332.35	4	0	3332.4	-0.051279	0.947638	0.415218	sp|P0C6A7|VM27B_VIPBB/	1,E,N/	2	RecName: Full=Disintegrin VB7B [Vipera berus berus]	Vipera berus berus	104	104	1	9e-28	1	64	P0C6A7.1
			VSeo_23d.206.206.2 File:"VSeo_23d.raw", NativeID:"controllerType=0 controllerNumber=1 scan=206"	svMP	CPRNRYKGK	0,Acetyl[ProteinN-term];3,Arg->Val[R];5,Arg->Val[R];	1049.54	2	0.2449	1049.54	-0.005908	0.61753	0.999976	sp|P81630|VM23A_ECHCA/sp|P81631|VM23B_ECHCA/sp|P0C6A3|DIDBA_ECHML/sp|P82465|DID6A_ECHCS/	56,D,E/56,D,E/56,D,E/103,D,E/	3	metalloproteinase [Echis carinatus sochureki]	Echis carinatus sochureki	33.7	33.7	1	0.003	1	128	ADI47727.1
			VSeo_24a.88.88.2 File:"VSeo_24a.raw", NativeID:"controllerType=0 controllerNumber=1 scan=88"	VEGF	CSGCCTDESLK	1,Carbamidomethyl[C];4,Carbamidomethyl[C];5,Carbamidomethyl[C];	1316.48	2	0	1316.49	-0.007074	7.71355	0.00391292	sp|P83942|TXVE_VIPAP/sp|P67863|TXVE_VIPAA/sp|P82475|TXVE2_MACLB/	44,R,C/68,R,C/44,R,C/	0	vammin-1' [Vipera ammodytes ammodytes]	Vipera ammodytes ammodytes	39.2	39.2	1	4e-05	1	145	APB93447.1
			VSeo_24a.70.70.3 File:"VSeo_24a.raw", NativeID:"controllerType=0 controllerNumber=1 scan=70"	VEGF	FTEHTACECRPR	7,Carbamidomethyl[C];9,Carbamidomethyl[C];	1563.67	3	0	1563.68	-0.005606	7.77067	0.00786076	sp|P83942|TXVE_VIPAP/sp|P67863|TXVE_VIPAA/sp|P82475|TXVE2_MACLB/	84,K,R/108,K,R/84,K,R/	1	vammin-1' [Vipera ammodytes ammodytes]	Vipera ammodytes ammodytes	44.8	44.8	1	5e-07	1	145	APB93447.1
			VSeo_24a.241.241.3 File:"VSeo_24a.raw", NativeID:"controllerType=0 controllerNumber=1 scan=241"	VEGF	QVRPFLEVHER	0,Gln->pyro-Glu[AnyN-termQ];	1392.73	3	0	1392.74	-0.007354	11.6502	0.00887062	sp|P83942|TXVE_VIPAP/sp|P67863|TXVE_VIPAA/	0,-,S/24,G,S/	1	vammin-1' [Vipera ammodytes ammodytes]	Vipera ammodytes ammodytes	40.1	40.1	1	2e-05	1	145	APB93447.1
			VSeo_24a.187.187.2 File:"VSeo_24a.raw", NativeID:"controllerType=0 controllerNumber=1 scan=187"	VEGF	PSCVAVLR	3,Carbamidomethyl[C];	901.486	2	0	901.492	-0.005859	8.64382	0.019913	sp|C0K3N1|TXVE_BITAR/sp|P67861|TXVE_DABRR/sp|P83942|TXVE_VIPAP/sp|P0DL42|TXVE_DABSI/sp|P67863|TXVE_VIPAA/sp|P82475|TXVE2_MACLB/	60,R,C/60,R,C/36,R,C/36,R,C/60,R,C/36,R,C/	0	RecName: Full=Snake venom vascular endothelial growth factor toxin barietin; Short=svVEGF; AltName: Full=VEGF-F; Flags: Precursor [Bitis arietans]	Bitis arietans	28.2	28.2	1	0.18	1	150	C0K3N1.1
			VSeo_24a.181.181.2 File:"VSeo_24a.raw", NativeID:"controllerType=0 controllerNumber=1 scan=181"	VEGF	HTVDLQIMR	8,Oxidation[M];	1128.58	2	0	1128.58	-0.007464	6.64178	0.0312236	sp|P83942|TXVE_VIPAP/sp|P67863|TXVE_VIPAA/	61,K,V/85,K,V/	0	vammin-1' [Vipera ammodytes ammodytes]	Vipera ammodytes ammodytes	34.1	34.1	1	0.002	1	145	APB93447.1
			VSeo_24a.206.206.3 File:"VSeo_24a.raw", NativeID:"controllerType=0 controllerNumber=1 scan=206"	VEGF	PFLEVHER		1026.54	3	0	1026.54	-0.000919	1.68109	0.0962729	sp|P83942|TXVE_VIPAP/sp|P67863|TXVE_VIPAA/	3,R,S/27,R,S/	0	vammin-1' [Vipera ammodytes ammodytes]	Vipera ammodytes ammodytes	30.3	30.3	1	0.031	1	145	APB93447.1
			VSeo_24a.49.49.2 File:"VSeo_24a.raw", NativeID:"controllerType=0 controllerNumber=1 scan=49"	VEGF	QGEPDGPK		827.388	2	0	827.389	-0.001105	0.899527	0.201965	sp|P83942|TXVE_VIPAP/sp|P67863|TXVE_VIPAA/sp|P82475|TXVE2_MACLB/	98,K,E/122,K,E/98,K,E/	0	vammin-1' [Vipera ammodytes ammodytes]	Vipera ammodytes ammodytes	28.2	28.2	1	0.18	1	145	APB93447.1
			VSeo_24a.48.48.2 File:"VSeo_24a.raw", NativeID:"controllerType=0 controllerNumber=1 scan=48"	VEGF	CTPVGK	1,Carbamidomethyl[C];	661.333	2	0	661.334	-0.000566	1.87947	0.229347	sp|P67861|TXVE_DABRR/sp|P83942|TXVE_VIPAP/sp|P0DL42|TXVE_DABSI/sp|P67863|TXVE_VIPAA/sp|P82475|TXVE2_MACLB/	79,K,H/55,K,H/55,K,H/79,K,H/55,K,H/	0	vammin-1' [Vipera ammodytes ammodytes]	Vipera ammodytes ammodytes	22.3	22.3	1	14	1	145	APB93447.1
			VSeo_24a.191.191.3 File:"VSeo_24a.raw", NativeID:"controllerType=0 controllerNumber=1 scan=191"	VEGF	PDEVAHLFR		1083.56	3	0	1083.56	-0.00233	1.01152	0.303962	sp|B0VXV4|TXVE_SISCA/sp|B0VXV3|TXVE1_SISCA/	51,H,P/51,H,P/	0	RecName: Full=Snake venom vascular endothelial growth factor toxin 1; Short=svVEGF; AltName: Full=VEGF-F; Flags: Precursor [Sistrurus catenatus edwardsi]	Sistrurus catenatus edwardsi	32.9	32.9	1	0.005	1	149	B0VXV3.1
			VSeo_24a.214.214.3 File:"VSeo_24a.raw", NativeID:"controllerType=0 controllerNumber=1 scan=214"	VEGF	PFLDVYER		1038.53	3	0.25856	1038.53	0.009123	1.83185	0.960305	sp|P67861|TXVE_DABRR/	27,R,S/	0	RecName: Full=Snake venom vascular endothelial growth factor toxin VR-1; Short=svVEGF; AltName: Full=VEGF-F; Flags: Precursor [Daboia russelii]	Daboia russelii	30.8	30.8	1	0.023	1	144	P67861.2
			VSeo_24b.233.233.2 File:"VSeo_24b.raw", NativeID:"controllerType=0 controllerNumber=1 scan=233"	DI	GDWNDDYCTGISSDCPR	8,Carbamidomethyl[C];15,Carbamidomethyl[C];	2017.75	2	0	2017.76	-0.015562	16.6232	3.04833e-05	sp|P81743|VM2AB_ERIMA/	46,M,N/	0	eristocophin II [Eristocophis macmahoni=leaf-nosed viper, venom, Peptide, 61 aa] [Eristicophis macmahoni]	Eristicophis macmahoni	61.7	61.7	1	9e-13	1	61	AAB25266.1
			VSeo_24b.251.251.2 File:"VSeo_24b.raw", NativeID:"controllerType=0 controllerNumber=1 scan=251"	DI	AMLDGLNDYCTGISSDCPR	2,Oxidation[M];10,Carbamidomethyl[C];17,Carbamidomethyl[C];	2160.88	2	0	2160.9	-0.018467	21.1746	5.31808e-05	sp|P0C6A3|DIDBA_ECHML/sp|P82465|DID6A_ECHCS/	40,K,N/87,K,N/	0	RecName: Full=Disintegrin EMS11A [Echis multisquamatus]	Echis multisquamatus	66	66	1	4e-14	1	68	P0C6A3.1
			VSeo_24b.544.544.11 File:"VSeo_24b.raw", NativeID:"controllerType=0 controllerNumber=1 scan=544"	VEGF	AILFCIQGWPSGTVQGQVRPFLEVHERSACQARETLVPILQEYPDEISDIFR	0,Acetyl[ProteinN-term];5,Carbamidomethyl[C];27,Carbamyl[R];30,Carbamidomethyl[C];	6140.99	11	0	6141.07	-0.080244	0.952829	0.000119115	sp|P67863|TXVE_VIPAA/	8,V,P/	3	vammin-1' [Vipera ammodytes ammodytes]	Vipera ammodytes ammodytes	110	110	1	2e-32	1	145	APB93447.1
			VSeo_24b.161.161.2 File:"VSeo_24b.raw", NativeID:"controllerType=0 controllerNumber=1 scan=161"	DI	QNSGNPCCDPVTCKPR	0,Gln->pyro-Glu[AnyN-termQ];7,Carbamidomethyl[C];8,Carbamidomethyl[C];13,Carbamidomethyl[C];	1872.76	2	0	1872.78	-0.015252	12.0076	0.00119135	sp|P81743|VM2AB_ERIMA/sp|P0C6A7|VM27B_VIPBB/	3,L,R/3,L,E/	1	RecName: Full=Disintegrin VB7B [Vipera berus berus]	Vipera berus berus	57.1	57.1	1	4e-11	1	64	P0C6A7.1
			VSeo_24b.197.197.3 File:"VSeo_24b.raw", NativeID:"controllerType=0 controllerNumber=1 scan=197"	DI	ELLQNSGNPCCDPVTCKPR	10,Carbamidomethyl[C];11,Carbamidomethyl[C];16,Carbamidomethyl[C];	2245	3	0	2245.02	-0.01088	6.46237	0.00179155	sp|P81743|VM2AB_ERIMA/sp|P0C6A7|VM27B_VIPBB/	0,-,R/0,-,E/	1	RecName: Full=Disintegrin VB7B [Vipera berus berus]	Vipera berus berus	66.4	66.4	1	3e-14	1	64	P0C6A7.1
			VSeo_24b.158.158.3 File:"VSeo_24b.raw", NativeID:"controllerType=0 controllerNumber=1 scan=158"	DI	NSANPCCDPITCKPR	6,Carbamidomethyl[C];7,Carbamidomethyl[C];12,Carbamidomethyl[C];	1789.77	3	0	1789.78	-0.008621	6.55687	0.00389185	sp|Q3BK13|DID2A_MACLB/sp|P0C6B0|DID5B_MACLO/	47,M,K/1,M,R/	1	VGD-containing dimeric disintegrin subunit ML-G1 precursor [Macrovipera lebetina transmediterranea]	Macrovipera lebetina transmediterranea	54.1	54.1	1	4e-10	1	65	CAK12626.1
			VSeo_24b.230.230.3 File:"VSeo_24b.raw", NativeID:"controllerType=0 controllerNumber=1 scan=230"	DI	AKGDWMNNYCTGISSDCPR	5,Trp->Arg[W];10,Carbamidomethyl[C];17,Carbamidomethyl[C];	2201.92	3	0	2201.95	-0.029896	2.05311	0.00427822	sp|P0C6A7|VM27B_VIPBB/	44,D,N/	1	RecName: Full=Disintegrin VB7B [Vipera berus berus]	Vipera berus berus	68.5	68.5	1	4e-15	1	64	P0C6A7.1
			VSeo_24b.240.240.3 File:"VSeo_24b.raw", NativeID:"controllerType=0 controllerNumber=1 scan=240"	VEGF	QVRPFLEVHER	0,Gln->pyro-Glu[AnyN-termQ];	1392.73	3	0	1392.74	-0.003234	10.8379	0.00500037	sp|P83942|TXVE_VIPAP/sp|P67863|TXVE_VIPAA/	0,-,S/24,G,S/	1	vammin-1' [Vipera ammodytes ammodytes]	Vipera ammodytes ammodytes	40.1	40.1	1	2e-05	1	145	APB93447.1
			VSeo_24b.480.480.15 File:"VSeo_24b.raw", NativeID:"controllerType=0 controllerNumber=1 scan=480"	DI	ESGNINDYEIVYPKKVAVLPTGAMNSVHPCCDPVTCEPR	0,Acetyl[ProteinN-term];25,Deamidated[N];30,Carbamidomethyl[C];31,Carbamidomethyl[C];36,Carbamidomethyl[C];39,Carbamyl[R];	4503.02	15	0	4503.07	-0.050936	0.934693	0.00547611	sp|P82465|DID6A_ECHCS/	23,L,E/	2	RecName: Full=Disintegrin EC6 subunit alpha; Short=EC6A; Flags: Precursor [Echis carinatus sochureki]	Echis carinatus sochureki	83.6	83.6	1	3e-22	1	115	P82465.2
			VSeo_24b.254.254.2 File:"VSeo_24b.raw", NativeID:"controllerType=0 controllerNumber=1 scan=254"	DI	KGDWMNNYCTGISSDCPR	9,Carbamidomethyl[C];16,Carbamidomethyl[C];	2160.88	2	0	2160.89	-0.005398	8.82169	0.00626638	sp|P0C6A7|VM27B_VIPBB/	45,A,N/	1	RecName: Full=Disintegrin VB7B [Vipera berus berus]	Vipera berus berus	66	66	1	3e-14	1	64	P0C6A7.1
			VSeo_24b.194.194.3 File:"VSeo_24b.raw", NativeID:"controllerType=0 controllerNumber=1 scan=194"	VEGF	PFLEVHER		1026.54	3	0	1026.54	-0.001468	9.5475	0.00672651	sp|P83942|TXVE_VIPAP/sp|P67863|TXVE_VIPAA/	3,R,S/27,R,S/	0	vammin-1' [Vipera ammodytes ammodytes]	Vipera ammodytes ammodytes	30.3	30.3	1	0.031	1	145	APB93447.1
			VSeo_24b.125.125.3 File:"VSeo_24b.raw", NativeID:"controllerType=0 controllerNumber=1 scan=125"	DI	SGNPCCDPVTCKPR	5,Carbamidomethyl[C];6,Carbamidomethyl[C];11,Carbamidomethyl[C];	1647.7	3	0	1647.7	-0.006849	1.88347	0.0109012	sp|P81743|VM2AB_ERIMA/sp|P0C6A7|VM27B_VIPBB/sp|P0C6A8|DID4_MACLO/sp|P83254|DID1B_MACLB/sp|P0C6A6|DID7A_VIPBB/sp|P83253|DID1A_MACLB/	5,N,R/5,N,E/2,N,R/1,N,R/1,N,R/48,N,R/	1	metalloproteinase of class P-II MPII-1 [Vipera ammodytes ammodytes]	Vipera ammodytes ammodytes	50.3	71.3	1	9e-09	1	478	AMB36349.1
			VSeo_24b.47.47.3 File:"VSeo_24b.raw", NativeID:"controllerType=0 controllerNumber=1 scan=47"	DI	KGEHCVSGPCCR	5,Carbamidomethyl[C];10,Carbamidomethyl[C];11,Carbamidomethyl[C];	1446.59	3	0	1446.6	-0.012311	7.52606	0.0191109	sp|Q3BK13|DID2A_MACLB/sp|P81742|DIDAA_ERIMA/	62,R,N/16,K,N/	1	disintegrin [Macrovipera lebetina]	Macrovipera lebetina	43.5	43.5	1	2e-06	1	128	ABC18317.1
			VSeo_24b.179.179.2 File:"VSeo_24b.raw", NativeID:"controllerType=0 controllerNumber=1 scan=179"	DI	AGTVCLPAW	5,Carbamidomethyl[C];9,Trp->Arg[W];	944.492	2	0	944.498	-0.006363	5.96328	0.0239578	sp|P83044|DID8B_CERCE/	33,T,G/	0	RecName: Full=Disintegrin CC8B [Cerastes cerastes]	Cerastes cerastes	32.9	32.9	1	0.005	1	65	P83044.1
			VSeo_24b.69.69.3 File:"VSeo_24b.raw", NativeID:"controllerType=0 controllerNumber=1 scan=69"	VEGF	FTEHTACECRPR	7,Carbamidomethyl[C];9,Carbamidomethyl[C];	1563.68	3	0	1563.68	-0.002127	2.71008	0.0357479	sp|P83942|TXVE_VIPAP/sp|P67863|TXVE_VIPAA/sp|P82475|TXVE2_MACLB/	84,K,R/108,K,R/84,K,R/	1	vammin-1' [Vipera ammodytes ammodytes]	Vipera ammodytes ammodytes	44.8	44.8	1	5e-07	1	145	APB93447.1
			VSeo_24b.215.215.2 File:"VSeo_24b.raw", NativeID:"controllerType=0 controllerNumber=1 scan=215"	DI	FLNPGTICK	8,Carbamidomethyl[C];	1049.54	2	0	1049.54	-0.003474	7.57328	0.040166	sp|Q3BK13|DID2A_MACLB/sp|P81742|DIDAA_ERIMA/sp|P0C6B0|DID5B_MACLO/	77,K,R/31,K,K/31,K,R/	0	disintegrin [Macrovipera lebetina]	Macrovipera lebetina	32.9	32.9	1	0.005	1	128	ABC18317.1
			VSeo_24b.90.90.2 File:"VSeo_24b.raw", NativeID:"controllerType=0 controllerNumber=1 scan=90"	VEGF	CSGCCTDESLK	1,Carbamidomethyl[C];4,Carbamidomethyl[C];5,Carbamidomethyl[C];	1316.48	2	0	1316.49	-0.008173	0.9346	0.0480587	sp|P83942|TXVE_VIPAP/sp|P67863|TXVE_VIPAA/sp|P82475|TXVE2_MACLB/	44,R,C/68,R,C/44,R,C/	0	vammin-1' [Vipera ammodytes ammodytes]	Vipera ammodytes ammodytes	39.2	39.2	1	4e-05	1	145	APB93447.1
			VSeo_24b.159.159.3 File:"VSeo_24b.raw", NativeID:"controllerType=0 controllerNumber=1 scan=159"	DI	MNSANPCCDPITCKPK	1,Oxidation[M];7,Carbamidomethyl[C];8,Carbamidomethyl[C];13,Carbamidomethyl[C];	1908.8	3	0	1908.81	-0.009609	1.97469	0.0992791	sp|P81742|DIDAA_ERIMA/	0,-,K/	1	RecName: Full=Disintegrin EMF10A; Short=EMF-10A; AltName: Full=Eristocophin I; AltName: Full=Platelet aggregation activation inhibitor [Eristicophis macmahoni]	Eristicophis macmahoni	35.4	35.4	1	0.0003	1	69	P81742.1
			VSeo_24b.222.222.2 File:"VSeo_24b.raw", NativeID:"controllerType=0 controllerNumber=1 scan=222"	VEGF	HTVDLQIMR		1112.58	2	0	1112.59	-0.007544	1.72223	0.111486	sp|P83942|TXVE_VIPAP/sp|P67863|TXVE_VIPAA/	61,K,V/85,K,V/	0	vammin-1' [Vipera ammodytes ammodytes]	Vipera ammodytes ammodytes	34.1	34.1	1	0.002	1	145	APB93447.1
			VSeo_24b.41.41.2 File:"VSeo_24b.raw", NativeID:"controllerType=0 controllerNumber=1 scan=41"	svMP	PVTCKPR	4,Carbamidomethyl[C];	857.461	2	0	857.466	-0.005038	0.966468	0.197122	sp|P81743|VM2AB_ERIMA/sp|P0C6A5|VM2A6_VIPAA/sp|P0C6A7|VM27B_VIPBB/sp|P0C6A8|DID4_MACLO/sp|P83254|DID1B_MACLB/sp|P0C6A6|DID7A_VIPBB/sp|P83253|DID1A_MACLB/	12,D,R/8,D,R/12,D,E/9,D,R/8,D,R/8,D,R/55,D,R/	1	metalloproteinase of class P-II MPII-1 [Vipera ammodytes ammodytes]	Vipera ammodytes ammodytes	26.5	26.5	1	0.58	1	478	AMB36349.1
			VSeo_24b.174.174.2 File:"VSeo_24b.raw", NativeID:"controllerType=0 controllerNumber=1 scan=174"	svMP	DPVTCKPK	5,Carbamidomethyl[C];	944.496	2	0	944.487	0.00896	0.759125	0.212489	sp|Q6T271|VM2BI_BITGA/sp|P82466|VM26B_ECHCS/sp|Q6T6T2|DID2_BITGA/sp|P83043|DID8A_CERCE/sp|Q3BK16|DIDA_CERVI/sp|M5BGS2|DID_ATHSQ/sp|P83041|DID5_CERCE/sp|Q3BK15|DIDB_CERVI/sp|M5BGY5|DID_ATHCH/sp|Q6T6T3|DID1_BITGA/sp|P83044|DID8B_CERCE/sp|M5BHN0|DID_ATHNI/	265,C,A/7,C,R/54,C,R/8,C,R/54,C,R/54,C,K/8,C,R/7,C,R/54,C,K/54,C,R/7,C,R/54,C,K/	1	metalloproteinase [Echis carinatus sochureki]	Echis carinatus sochureki	29.5	29.5	1	0.064	1	474	ADI47723.1
			VSeo_24b.170.170.2 File:"VSeo_24b.raw", NativeID:"controllerType=0 controllerNumber=1 scan=170"	PLA2	KPKDGTDR		916.488	2	0	916.485	0.003703	0.003	0.267867	sp|Q8UVZ7|PA2H_CROAT/sp|P14421|PA2N_GLOHA/sp|P0C616|PA2HA_BOTAS/sp|P0C8M1|PA2B1_BOTMO/	50,H,C/34,G,C/50,H,C/35,E,C/	2	phospholipase A2 [Crotalus atrox]	Crotalus atrox	28.2	28.2	1	0.19	1	164	QBA85153.1
			VSeo_24b.183.183.2 File:"VSeo_24b.raw", NativeID:"controllerType=0 controllerNumber=1 scan=183"	VEGF	HTVDLQIMR	8,Oxidation[M];	1128.58	2	0	1128.58	-0.002703	3.3333	0.295558	sp|P83942|TXVE_VIPAP/sp|P67863|TXVE_VIPAA/	61,K,V/85,K,V/	0	vammin-1' [Vipera ammodytes ammodytes]	Vipera ammodytes ammodytes	34.1	34.1	1	0.002	1	145	APB93447.1
			VSeo_24b.192.192.2 File:"VSeo_24b.raw", NativeID:"controllerType=0 controllerNumber=1 scan=192"	DI	LNPGTICK	0,Acetyl[ProteinN-term];7,Carbamidomethyl[C];	944.495	2	0.11972	944.487	0.00841	0.001	0.845341	sp|Q3BK13|DID2A_MACLB/sp|P81742|DIDAA_ERIMA/sp|P0C6B0|DID5B_MACLO/	78,F,R/32,F,K/32,F,R/	0	disintegrin [Macrovipera lebetina]	Macrovipera lebetina	29.1	29.1	1	0.094	1	128	ABC18317.1
			VSeo_24b.131.131.3 File:"VSeo_24b.raw", NativeID:"controllerType=0 controllerNumber=1 scan=131"	svMP	EGEHCISGPCCRNCK	5,Carbamidomethyl[C];12,Carbamyl[R];14,Carbamidomethyl[C];	1792.68	3	0.37308	1792.7	-0.019263	1.63003	0.999999	sp|P0C6A7|VM27B_VIPBB/sp|P81631|VM23B_ECHCA/sp|P0C6A3|DIDBA_ECHML/sp|P82465|DID6A_ECHCS/sp|Q5EE07|DID_ECHCA/	19,R,F/15,R,F/15,R,F/62,R,F/15,R,F/	1	metalloproteinase [Echis coloratus]	Echis coloratus	36.2	36.2	1	0.0004	1	128	ADI47717.1
			VSeo_24b.134.134.2 File:"VSeo_24b.raw", NativeID:"controllerType=0 controllerNumber=1 scan=134"	DI	RGEHCISGPCCENCK	1,Carbamyl[R];5,Carbamidomethyl[C];14,Carbamidomethyl[C];	1792.68	2	0.35924	1792.7	-0.022667	1.76305	0.999999	sp|P83044|DID8B_CERCE/	15,K,F/	1	RecName: Full=Disintegrin CC8B [Cerastes cerastes]	Cerastes cerastes	54.9	72.5	1	2e-10	1	65	P83044.1
			VSeo_24c25c	DI	manual compared and confirmed to 24b (MS1 +MS2) as DI
			VSeo_25a.87.87.2 File:"VSeo_25a.raw", NativeID:"controllerType=0 controllerNumber=1 scan=87"	VEGF	CSGCCTDESLK	0,Carbamidomethyl[AnyN-term];4,Carbamidomethyl[C];5,Carbamidomethyl[C];	1316.48	2	0	1316.49	-0.008539	10.934	7.86636e-07	sp|P83942|TXVE_VIPAP/sp|P67863|TXVE_VIPAA/sp|P82475|TXVE2_MACLB/	44,R,C/68,R,C/44,R,C/	0	vammin-1' [Vipera ammodytes ammodytes]	Vipera ammodytes ammodytes	39.2	39.2	1	4e-05	1	145	APB93447.1
			VSeo_25a.192.192.3 File:"VSeo_25a.raw", NativeID:"controllerType=0 controllerNumber=1 scan=192"	VEGF	PFLEVHER		1026.53	3	0	1026.54	-0.004581	9.68565	3.68882e-06	sp|P83942|TXVE_VIPAP/sp|P67863|TXVE_VIPAA/	3,R,S/27,R,S/	0	vammin-1' [Vipera ammodytes ammodytes]	Vipera ammodytes ammodytes	30.3	30.3	1	0.031	1	145	APB93447.1
			VSeo_25a.184.184.2 File:"VSeo_25a.raw", NativeID:"controllerType=0 controllerNumber=1 scan=184"	VEGF	PSCVAVLR	3,Carbamidomethyl[C];	901.49	2	0	901.492	-0.002441	11.9218	3.73896e-06	sp|C0K3N1|TXVE_BITAR/sp|P67861|TXVE_DABRR/sp|P83942|TXVE_VIPAP/sp|P0DL42|TXVE_DABSI/sp|P67863|TXVE_VIPAA/sp|P82475|TXVE2_MACLB/	60,R,C/60,R,C/36,R,C/36,R,C/60,R,C/36,R,C/	0	RecName: Full=Snake venom vascular endothelial growth factor toxin barietin; Short=svVEGF; AltName: Full=VEGF-F; Flags: Precursor [Bitis arietans]	Bitis arietans	28.2	28.2	1	0.18	1	150	C0K3N1.1
			VSeo_25a.237.237.3 File:"VSeo_25a.raw", NativeID:"controllerType=0 controllerNumber=1 scan=237"	VEGF	QVRPFLEVHER	0,Gln->pyro-Glu[AnyN-termQ];	1392.73	3	0	1392.74	-0.006347	14.2071	2.19307e-05	sp|P83942|TXVE_VIPAP/sp|P67863|TXVE_VIPAA/	0,-,S/24,G,S/	1	vammin-1' [Vipera ammodytes ammodytes]	Vipera ammodytes ammodytes	40.1	40.1	1	2e-05	1	145	APB93447.1
			VSeo_25a.180.180.2 File:"VSeo_25a.raw", NativeID:"controllerType=0 controllerNumber=1 scan=180"	VEGF	HTVDLQIMR	8,Oxidation[M];	1128.57	2	0	1128.58	-0.00844	8.3837	3.5869e-05	sp|P83942|TXVE_VIPAP/sp|P67863|TXVE_VIPAA/	61,K,V/85,K,V/	0	vammin-1' [Vipera ammodytes ammodytes]	Vipera ammodytes ammodytes	34.1	34.1	1	0.002	1	145	APB93447.1
			VSeo_25a.69.69.3 File:"VSeo_25a.raw", NativeID:"controllerType=0 controllerNumber=1 scan=69"	VEGF	FTEHTACECRPRR	10,Arg->Asn[R];	1563.67	3	0	1563.68	-0.007427	4.55454	0.000264832	sp|P83942|TXVE_VIPAP/sp|P67863|TXVE_VIPAA/sp|P82475|TXVE2_MACLB/	84,K,K/108,K,K/84,K,K/	2	vammin-1' [Vipera ammodytes ammodytes]	Vipera ammodytes ammodytes	48.1	48.1	1	4e-08	1	145	APB93447.1
			VSeo_25a.72.72.3 File:"VSeo_25a.raw", NativeID:"controllerType=0 controllerNumber=1 scan=72"	VEGF	FTEHTACECRPR	7,Carbamidomethyl[C];9,Carbamidomethyl[C];	1563.67	3	0	1563.68	-0.008352	7.11173	0.000289875	sp|P83942|TXVE_VIPAP/sp|P67863|TXVE_VIPAA/sp|P82475|TXVE2_MACLB/	84,K,R/108,K,R/84,K,R/	1	vammin-1' [Vipera ammodytes ammodytes]	Vipera ammodytes ammodytes	44.8	44.8	1	5e-07	1	145	APB93447.1
			VSeo_25a.49.49.2 File:"VSeo_25a.raw", NativeID:"controllerType=0 controllerNumber=1 scan=49"	VEGF	QGEPDGPK		827.387	2	0	827.389	-0.002447	0.972169	0.213701	sp|P83942|TXVE_VIPAP/sp|P67863|TXVE_VIPAA/sp|P82475|TXVE2_MACLB/	98,K,E/122,K,E/98,K,E/	0	vammin-1' [Vipera ammodytes ammodytes]	Vipera ammodytes ammodytes	28.2	28.2	1	0.18	1	145	APB93447.1
			VSeo_25a.48.48.2 File:"VSeo_25a.raw", NativeID:"controllerType=0 controllerNumber=1 scan=48"	VEGF	CTPVGK	1,Carbamidomethyl[C];	661.332	2	0	661.334	-0.001421	1.86098	0.249845	sp|P67861|TXVE_DABRR/sp|P83942|TXVE_VIPAP/sp|P0DL42|TXVE_DABSI/sp|P67863|TXVE_VIPAA/sp|P82475|TXVE2_MACLB/	79,K,H/55,K,H/55,K,H/79,K,H/55,K,H/	0	vammin-1' [Vipera ammodytes ammodytes]	Vipera ammodytes ammodytes	22.3	22.3	1	14	1	145	APB93447.1
			VSeo_25a.235.235.3 File:"VSeo_25a.raw", NativeID:"controllerType=0 controllerNumber=1 scan=235"	VEGF	GQVRPFLEVHER	0,unknown[196.085 Da][111][ProteinN-term];	1577.82	3	0	1577.82	-0.002828	4.86409	0.38859	sp|P67863|TXVE_VIPAA/	23,Q,S/	1	vammin-1' [Vipera ammodytes ammodytes]	Vipera ammodytes ammodytes	42.6	42.6	1	3e-06	1	145	APB93447.1
			VSeo_25a.102.102.2 File:"VSeo_25a.raw", NativeID:"controllerType=0 controllerNumber=1 scan=102"	VEGF	RCSGCCTDESLK	1,Arg->Asn[R];5,Carbamidomethyl[C];6,Carbamidomethyl[C];	1373.51	2	0.043983	1373.51	-0.007776	1.49621	0.639307	sp|P83942|TXVE_VIPAP/sp|P67863|TXVE_VIPAA/sp|P82475|TXVE2_MACLB/	43,L,C/67,L,C/43,L,C/	1	vammin-1' [Vipera ammodytes ammodytes]	Vipera ammodytes ammodytes	42.6	42.6	1	3e-06	1	145	APB93447.1
			VSeo_25a.413.413.3 File:"VSeo_25a.raw", NativeID:"controllerType=0 controllerNumber=1 scan=413"	VEGF	AILFCIQGWPSGTVQGQVRPFLDVYER	0,unknown[196.085 Da][111][ProteinN-term];19,Arg->Asn[R];	3148.62	3	0.47448	3148.56	0.062335	0.008895	0.995077	sp|P67861|TXVE_DABRR/	8,V,S/	1	RecName: Full=Snake venom vascular endothelial growth factor toxin barietin; Short=svVEGF; AltName: Full=VEGF-F; Flags: Precursor [Bitis arietans]	Bitis arietans	112	112	1	5e-33	1	150	C0K3N1.1
			VSeo_25b.232.232.2 File:"VSeo_25b.raw", NativeID:"controllerType=0 controllerNumber=1 scan=232"	DI	GDWNDDYCTGISSDCPR	8,Carbamidomethyl[C];15,Carbamidomethyl[C];	2017.75	2	0	2017.76	-0.014463	17.1393	6.35153e-07	sp|P81743|VM2AB_ERIMA/	46,M,N/	0	eristocophin II [Eristocophis macmahoni=leaf-nosed viper, venom, Peptide, 61 aa] [Eristicophis macmahoni]	Eristicophis macmahoni	61.7	61.7	1	9e-13	1	61	AAB25266.1
			VSeo_25b.250.250.2 File:"VSeo_25b.raw", NativeID:"controllerType=0 controllerNumber=1 scan=250"	DI	AMLDGLNDYCTGISSDCPR	2,Oxidation[M];10,Carbamidomethyl[C];17,Carbamidomethyl[C];	2160.89	2	0	2160.9	-0.014072	17.6528	2.25332e-05	sp|P0C6A3|DIDBA_ECHML/sp|P82465|DID6A_ECHCS/	40,K,N/87,K,N/	0	RecName: Full=Disintegrin EMS11A [Echis multisquamatus]	Echis multisquamatus	66	66	1	4e-14	1	68	P0C6A3.1
			VSeo_25b.220.220.2 File:"VSeo_25b.raw", NativeID:"controllerType=0 controllerNumber=1 scan=220"	DI	FLNPGTICK	8,Carbamidomethyl[C];	1049.54	2	0	1049.54	-0.006892	8.48409	0.000410719	sp|Q3BK13|DID2A_MACLB/sp|P81742|DIDAA_ERIMA/sp|P0C6B0|DID5B_MACLO/	77,K,R/31,K,K/31,K,R/	0	disintegrin [Macrovipera lebetina]	Macrovipera lebetina	32.9	32.9	1	0.005	1	128	ABC18317.1
			VSeo_25b.241.241.3 File:"VSeo_25b.raw", NativeID:"controllerType=0 controllerNumber=1 scan=241"	VEGF	VRPFLEVHER	0,unknown[196.085 Da][111][ProteinN-term];	1392.73	3	0	1392.74	-0.007908	12.9189	0.00148014	sp|P83942|TXVE_VIPAP/sp|P67863|TXVE_VIPAA/	1,Q,S/25,Q,S/	1	vammin-1' [Vipera ammodytes ammodytes]	Vipera ammodytes ammodytes	36.7	36.7	1	0.0003	1	145	APB93447.1
			VSeo_25b.157.157.3 File:"VSeo_25b.raw", NativeID:"controllerType=0 controllerNumber=1 scan=157"	DI	NSANPCCDPITCKPR	6,Carbamidomethyl[C];7,Carbamidomethyl[C];12,Carbamidomethyl[C];	1789.77	3	0	1789.78	-0.009902	6.17738	0.00552655	sp|Q3BK13|DID2A_MACLB/sp|P0C6B0|DID5B_MACLO/	47,M,K/1,M,R/	1	VGD-containing dimeric disintegrin subunit ML-G1 precursor [Macrovipera lebetina transmediterranea]	Macrovipera lebetina transmediterranea	54.1	54.1	1	4e-10	1	65	CAK12626.1
			VSeo_25b.184.184.2 File:"VSeo_25b.raw", NativeID:"controllerType=0 controllerNumber=1 scan=184"	VEGF	HTVDLQIMR	8,Oxidation[M];	1128.57	2	0	1128.58	-0.008196	6.02374	0.00568038	sp|P83942|TXVE_VIPAP/sp|P67863|TXVE_VIPAA/	61,K,V/85,K,V/	0	vammin-1' [Vipera ammodytes ammodytes]	Vipera ammodytes ammodytes	34.1	34.1	1	0.002	1	145	APB93447.1
			VSeo_25b.221.221.2 File:"VSeo_25b.raw", NativeID:"controllerType=0 controllerNumber=1 scan=221"	VEGF	HTVDLQIMR		1112.58	2	0	1112.59	-0.006934	6.51366	0.00689164	sp|P83942|TXVE_VIPAP/sp|P67863|TXVE_VIPAA/	61,K,V/85,K,V/	0	vammin-1' [Vipera ammodytes ammodytes]	Vipera ammodytes ammodytes	34.1	34.1	1	0.002	1	145	APB93447.1
			VSeo_25b.151.151.3 File:"VSeo_25b.raw", NativeID:"controllerType=0 controllerNumber=1 scan=151"	DI	NSGNPCCDPVTCKPR	6,Carbamidomethyl[C];7,Carbamidomethyl[C];12,Carbamidomethyl[C];	1761.76	3	0	1761.75	0.017612	1.95415	0.0118836	sp|P81743|VM2AB_ERIMA/sp|P0C6A7|VM27B_VIPBB/sp|P0C6A8|DID4_MACLO/sp|P83254|DID1B_MACLB/sp|P0C6A6|DID7A_VIPBB/sp|P83253|DID1A_MACLB/	4,Q,R/4,Q,E/1,M,R/0,-,R/0,-,R/47,M,R/	1	RecName: Full=Disintegrin VB7B [Vipera berus berus]	Vipera berus berus	53.7	53.7	1	6e-10	1	64	P0C6A7.1
			VSeo_25b.70.70.3 File:"VSeo_25b.raw", NativeID:"controllerType=0 controllerNumber=1 scan=70"	VEGF	FTEHTACECRPR	7,Carbamidomethyl[C];9,Carbamidomethyl[C];	1563.67	3	0	1563.68	-0.007803	5.32491	0.0130209	sp|P83942|TXVE_VIPAP/sp|P67863|TXVE_VIPAA/sp|P82475|TXVE2_MACLB/	84,K,R/108,K,R/84,K,R/	1	vammin-1' [Vipera ammodytes ammodytes]	Vipera ammodytes ammodytes	44.8	44.8	1	5e-07	1	145	APB93447.1
			VSeo_25b.227.227.3 File:"VSeo_25b.raw", NativeID:"controllerType=0 controllerNumber=1 scan=227"	DI	MLDGLNDYCTGISSDCPR	0,unknown[196.085 Da][111][ProteinN-term];1,Oxidation[M];6,Deamidated[N];9,Carbamidomethyl[C];16,Carbamidomethyl[C];	2201.92	3	0	2201.88	0.038719	3.02715	0.0135413	sp|P0C6A3|DIDBA_ECHML/sp|P82465|DID6A_ECHCS/	41,A,N/88,A,N/	0	RecName: Full=Disintegrin EMS11A [Echis multisquamatus]	Echis multisquamatus	63.4	63.4	1	3e-13	1	68	P0C6A3.1
			VSeo_25b.251.251.3 File:"VSeo_25b.raw", NativeID:"controllerType=0 controllerNumber=1 scan=251"	DI	KGDWMNNYCTGISSDCPR	9,Carbamidomethyl[C];16,Carbamidomethyl[C];	2160.89	3	0	2160.89	0.002035	5.16824	0.016529	sp|P0C6A7|VM27B_VIPBB/	45,A,N/	1	RecName: Full=Disintegrin VB7B [Vipera berus berus]	Vipera berus berus	66	66	1	3e-14	1	64	P0C6A7.1
			VSeo_25b.193.193.3 File:"VSeo_25b.raw", NativeID:"controllerType=0 controllerNumber=1 scan=193"	VEGF	PFLEVHER		1026.54	3	0	1026.54	-0.000827	7.8921	0.0195112	sp|P83942|TXVE_VIPAP/sp|P67863|TXVE_VIPAA/	3,R,S/27,R,S/	0	vammin-1' [Vipera ammodytes ammodytes]	Vipera ammodytes ammodytes	30.3	30.3	1	0.031	1	145	APB93447.1
			VSeo_25b.50.50.3 File:"VSeo_25b.raw", NativeID:"controllerType=0 controllerNumber=1 scan=50"	DI	KGEHCVSGPCCR	5,Carbamidomethyl[C];10,Carbamidomethyl[C];11,Carbamidomethyl[C];	1446.6	3	0	1446.6	-0.002972	7.51882	0.0333803	sp|Q3BK13|DID2A_MACLB/sp|P81742|DIDAA_ERIMA/	62,R,N/16,K,N/	1	disintegrin [Macrovipera lebetina]	Macrovipera lebetina	43.5	43.5	1	2e-06	1	128	ABC18317.1
			VSeo_25b.51.51.4 File:"VSeo_25b.raw", NativeID:"controllerType=0 controllerNumber=1 scan=51"	DI	KGEHCVSGPCCR	5,Carbamidomethyl[C];10,Carbamidomethyl[C];11,Carbamidomethyl[C];	1446.6	4	0	1446.6	-2.5e-05	2.8432	0.040481	sp|Q3BK13|DID2A_MACLB/sp|P81742|DIDAA_ERIMA/	62,R,N/16,K,N/	1	disintegrin [Macrovipera lebetina]	Macrovipera lebetina	43.5	43.5	1	2e-06	1	128	ABC18317.1
			VSeo_25b.91.91.2 File:"VSeo_25b.raw", NativeID:"controllerType=0 controllerNumber=1 scan=91"	VEGF	CSGCCTDESLK	1,Carbamidomethyl[C];4,Carbamidomethyl[C];5,Carbamidomethyl[C];	1316.48	2	0	1316.49	-0.008783	0.970947	0.135838	sp|P83942|TXVE_VIPAP/sp|P67863|TXVE_VIPAA/sp|P82475|TXVE2_MACLB/	44,R,C/68,R,C/44,R,C/	0	vammin-1' [Vipera ammodytes ammodytes]	Vipera ammodytes ammodytes	39.2	39.2	1	4e-05	1	145	APB93447.1
			VSeo_25b.181.181.2 File:"VSeo_25b.raw", NativeID:"controllerType=0 controllerNumber=1 scan=181"	PLA2	KTIICDVN	5,Carbamidomethyl[C];6,Dehydrated[D];	944.493	2	0	944.487	0.006033	0.001	0.153217	sp|Q8UVZ7|PA2H_CROAT/sp|P0DUP2|PA2H2_CROOA/	86,D,N/70,N,N/	1	phospholipase A2 [Crotalus atrox]	Crotalus atrox	29.9	29.9	1	0.046	1	164	QBA85153.1
			VSeo_25b.483.483.2 File:"VSeo_25b.raw", NativeID:"controllerType=0 controllerNumber=1 scan=483"	DI	AGTICKR	5,Carbamidomethyl[C];	805.427	2	0	805.435	-0.007979	0.002	0.165402	sp|P81631|VM23B_ECHCA/sp|P0C6A8|DID4_MACLO/sp|Q6T6T3|DID1_BITGA/sp|Q5EE07|DID_ECHCA/	33,N,A/34,N,A/80,N,G/33,N,A/	1	RecName: Full=Disintegrin gabonin-1; AltName: Full=Bitisgabonin-1; Flags: Precursor [Bitis gabonica]	Bitis gabonica	25.2	25.2	1	1.7	1	128	Q6T6T3.1
			VSeo_25b.178.178.2 File:"VSeo_25b.raw", NativeID:"controllerType=0 controllerNumber=1 scan=178"	DI	LNPGTICK	0,Acetyl[ProteinN-term];7,Carbamidomethyl[C];	944.493	2	0	944.487	0.005908	0.25875	0.213832	sp|Q3BK13|DID2A_MACLB/sp|P81742|DIDAA_ERIMA/sp|P0C6B0|DID5B_MACLO/	78,F,R/32,F,K/32,F,R/	0	disintegrin [Macrovipera lebetina]	Macrovipera lebetina	29.1	29.1	1	0.094	1	128	ABC18317.1
			VSeo_25b.274.274.2 File:"VSeo_25b.raw", NativeID:"controllerType=0 controllerNumber=1 scan=274"	DI	DGLNDYCTGISSDCPRNR	0,Acetyl[ProteinN-term];4,Deamidated[N];7,Carbamidomethyl[C];14,Carbamidomethyl[C];	2142.87	2	0	2142.88	-0.01638	0.922272	0.343662	sp|P0C6A3|DIDBA_ECHML/sp|P82465|DID6A_ECHCS/	43,L,Y/90,L,Y/	1	RecName: Full=Disintegrin EMS11A [Echis multisquamatus]	Echis multisquamatus	62.6	62.6	1	7e-13	1	68	P0C6A3.1
			VSeo_25b.133.133.2 File:"VSeo_25b.raw", NativeID:"controllerType=0 controllerNumber=1 scan=133"	svMP	EGEHCISGPCCRNCK	0,Acetyl[ProteinN-term];5,Carbamidomethyl[C];13,Deamidated[N];14,Carbamidomethyl[C];	1792.68	2	0.476	1792.69	-0.009969	0.005712	0.999944	sp|P0C6A7|VM27B_VIPBB/sp|P81631|VM23B_ECHCA/sp|P0C6A3|DIDBA_ECHML/sp|P82465|DID6A_ECHCS/sp|Q5EE07|DID_ECHCA/	19,R,F/15,R,F/15,R,F/62,R,F/15,R,F/	1	metalloproteinase [Echis coloratus]	Echis coloratus	36.2	36.2	1	0.0004	1	128	ADI47717.1
			VSeo_26a.195.195.2 File:"VSeo_26a.raw", NativeID:"controllerType=0 controllerNumber=1 scan=195"	PLA2	AAAICFR	5,Carbamidomethyl[C];	808.41	2	0	808.413	-0.003608	8.61725	0.0143971	sp|P81478|PA2A2_TRIGA/sp|P14418|PA2A_GLOHA/sp|P0DKU1|PA2H_GLOUS/sp|O42190|PA2A6_GLOHA/sp|O42189|PA2A5_GLOHA/sp|C0HKC4|PA2B1_AGKPC/sp|P51972|PA2B1_AGKPI/sp|Q91506|PA2A1_PROMU/sp|P00625|PA2A1_OVOOK/sp|P18998|PA2HA_CROSS/sp|F8QN50|PA2HS_VIPRE/sp|C0HLF0|PA2_POROP/sp|Q6H3C8|PA2AF_TRIST/sp|P17935|PA2HL_VIPAA/sp|O42188|PA2H_GLOHA/sp|Q2YHJ3|PA2A_TRIBO/sp|P14424|PA2BB_VIPAA/sp|C0HK16|PA2BD_DABRR/sp|Q02517…	90,K,D/90,R,D/90,R,D/90,R,D/90,R,D/90,R,D/90,R,D/89,R,D/106,L,D/106,K,D/106,R,E/89,K,D/106,K,D/106,R,E/90,K,D/106,R,D/106,R,K/90,K,Q/106,K,D/105,R,D/106,K,D/106,K,Q/106,K,D/90,R,D/106,K,E/106,K,E/106,R,K/106,K,D/90,K,R/90,K,D/90,K,D/90,R,E/90,R,D/106,R,D/106,K,D/105,R,D/106,R,K/106,R,K/106,R,D/106,K,D/106,K,D/106,K,N/106,K,D/106,R,D/106,K,D/106,K,D/106,K,D/90,K,D/90,R,D/106,K,D/90,K,Q/106,K,D/90,…	0	PLA2(IIA)-Aze2 [Azemiops feae]	Azemiops feae	25.7	25.7	1	1.1	1	151	ABU68548.1
			VSeo_26a.162.162.3 File:"VSeo_26a.raw", NativeID:"controllerType=0 controllerNumber=1 scan=162"	PLA2	CCFVHSCCYAK	1,Carbamidomethyl[C];2,Carbamidomethyl[C];7,Carbamidomethyl[C];8,Carbamidomethyl[C];	1491.56	3	0	1491.56	-0.008131	4.78689	0.0159786	sp|F8QN50|PA2HS_VIPRE/sp|P17935|PA2HL_VIPAA/	58,R,L/58,R,L/	0	ammodytin L(2) isoform [Vipera berus berus]	Vipera berus berus	43.1	43.1	1	2e-06	1	138	CAE47248.1
			VSeo_26a.246.246.3 File:"VSeo_26a.raw", NativeID:"controllerType=0 controllerNumber=1 scan=246"	PLA2	NPLTSYSFYGCYCGVGGK	18,unknown[132.069 Da][K];	2047.89	3	0	2047.9	-0.014742	4.56573	0.0358536	sp|P14424|PA2BB_VIPAA/sp|F8QN54|PA2B_VIPRE/sp|P00626|PA2BA_VIPAA/sp|P11407|PA2BC_VIPAA/	31,K,G/31,K,G/31,K,G/31,K,G/	0	ammodytoxin C variant [Vipera aspis aspis]	Vipera aspis aspis	62.1	62.1	1	1e-12	1	138	CAE47282.1
			VSeo_26a.61.61.2 File:"VSeo_26a.raw", NativeID:"controllerType=0 controllerNumber=1 scan=61"	PLA2	QICECDR	3,Carbamidomethyl[C];5,Carbamidomethyl[C];	980.389	2	0	980.392	-0.003545	1.86541	0.161568	sp|P0DUN0|PA23_BOTHY/sp|Q6H3C7|PA2AD_TRIST/sp|P81243|PA2A_BOTJA/sp|P0CAS3|PA2BC_CRODR/sp|P14421|PA2N_GLOHA/sp|C0HKC4|PA2B1_AGKPC/sp|P51972|PA2B1_AGKPI/sp|P24027|PA2BA_CRODU/sp|F8QN50|PA2HS_VIPRE/sp|P0CV89|PA23_CROAT/sp|Q8QG87|PA2A_BOTIN/sp|P0CG56|PA2BB_CRODU/sp|P0CAS4|PA2BD_CRODR/sp|P17935|PA2HL_VIPAA/sp|P0DUN4|PA2A2_BOTBZ/sp|P0DUN3|PA2A1_BOTBZ/sp|P0CAS2|PA2B6_CRODO/sp|P0CAS5|PA2BE_CRODU/sp|P0CAS…	63,K,V/99,K,A/85,K,V/83,Q,V/83,E,V/83,K,A/83,K,A/99,E,V/99,K,A/54,R,-/99,K,V/83,E,V/83,Q,V/99,K,A/68,X,V/74,K,V/83,E,V/83,E,V/83,E,V/59,E,V/70,K,V/82,E,V/99,K,A/99,K,A/83,E,I/99,K,V/83,K,V/83,K,A/99,K,V/99,E,V/83,E,A/99,K,A/83,K,V/85,K,V/99,K,V/82,E,V/83,K,V/99,E,V/99,K,A/83,K,V/99,K,V/82,E,V/99,E,V/83,E,V/83,E,V/83,E,V/	0	RecName: Full=Acidic phospholipase A2 Ts-A4; Short=svPLA2; AltName: Full=Phosphatidylcholine 2-acylhydrolase; Flags: Precursor [Trimeresurus stejnegeri]	Trimeresurus stejnegeri	28.6	28.6	1	0.11	1	139	Q6H3C7.1
			VSeo_26a.53.53.2 File:"VSeo_26a.raw", NativeID:"controllerType=0 controllerNumber=1 scan=53"	PLA2	LSDCSPK	4,Carbamidomethyl[C];	806.371	2	0	806.371	-0.000654	3.71784	0.199253	sp|F8QN50|PA2HS_VIPRE/	69,K,T/	0	ammodytin L(2) isoform [Vipera berus berus]	Vipera berus berus	25.2	25.2	1	1.7	1	138	CAE47248.1
			VSeo_26b.101.101.2 File:"VSeo_26b.raw", NativeID:"controllerType=0 controllerNumber=1 scan=101"	VEGF	CSGCCTDESLK	1,Carbamidomethyl[C];4,Carbamidomethyl[C];5,Carbamidomethyl[C];	1316.48	2	0	1316.49	-0.008417	7.65674	9.64827e-05	sp|P83942|TXVE_VIPAP/sp|P67863|TXVE_VIPAA/sp|P82475|TXVE2_MACLB/	44,R,C/68,R,C/44,R,C/	0	vammin-1' [Vipera ammodytes ammodytes]	Vipera ammodytes ammodytes	39.2	39.2	1	4e-05	1	145	APB93447.1
			VSeo_26b.170.170.3 File:"VSeo_26b.raw", NativeID:"controllerType=0 controllerNumber=1 scan=170"	PLA2	CCFVHSCCYAK	1,Carbamidomethyl[C];2,Carbamidomethyl[C];7,Carbamidomethyl[C];8,Carbamidomethyl[C];	1491.56	3	0	1491.56	-0.006483	16.7778	1.0932e-06	sp|F8QN50|PA2HS_VIPRE/sp|P17935|PA2HL_VIPAA/	58,R,L/58,R,L/	0	ammodytin L(2) isoform [Vipera berus berus]	Vipera berus berus	43.1	43.1	1	2e-06	1	138	CAE47248.1
			VSeo_26b.92.92.2 File:"VSeo_26b.raw", NativeID:"controllerType=0 controllerNumber=1 scan=92"	VEGF	CSGCCTDESLK	1,Carbamidomethyl[C];4,Carbamidomethyl[C];5,Carbamidomethyl[C];	1316.48	2	0	1316.49	-0.008295	13.2848	4.90721e-06	sp|P83942|TXVE_VIPAP/sp|P67863|TXVE_VIPAA/sp|P82475|TXVE2_MACLB/	44,R,C/68,R,C/44,R,C/	0	vammin-1' [Vipera ammodytes ammodytes]	Vipera ammodytes ammodytes	39.2	39.2	1	4e-05	1	145	APB93447.1
			VSeo_26b.194.194.2 File:"VSeo_26b.raw", NativeID:"controllerType=0 controllerNumber=1 scan=194"	VEGF	PSCVAVLR	3,Carbamidomethyl[C];	901.491	2	0	901.492	-0.00177	10.8732	4.32055e-05	sp|C0K3N1|TXVE_BITAR/sp|P67861|TXVE_DABRR/sp|P83942|TXVE_VIPAP/sp|P0DL42|TXVE_DABSI/sp|P67863|TXVE_VIPAA/sp|P82475|TXVE2_MACLB/	60,R,C/60,R,C/36,R,C/36,R,C/60,R,C/36,R,C/	0	RecName: Full=Snake venom vascular endothelial growth factor toxin barietin; Short=svVEGF; AltName: Full=VEGF-F; Flags: Precursor [Bitis arietans]	Bitis arietans	28.2	28.2	1	0.18	1	150	C0K3N1.1
			VSeo_26b.207.207.2 File:"VSeo_26b.raw", NativeID:"controllerType=0 controllerNumber=1 scan=207"	PLA2	AAAICFR	5,Carbamidomethyl[C];	808.407	2	0	808.413	-0.006782	8.06834	0.000264047	sp|P81478|PA2A2_TRIGA/sp|P14418|PA2A_GLOHA/sp|P0DKU1|PA2H_GLOUS/sp|O42190|PA2A6_GLOHA/sp|O42189|PA2A5_GLOHA/sp|C0HKC4|PA2B1_AGKPC/sp|P51972|PA2B1_AGKPI/sp|Q91506|PA2A1_PROMU/sp|P00625|PA2A1_OVOOK/sp|P18998|PA2HA_CROSS/sp|F8QN50|PA2HS_VIPRE/sp|C0HLF0|PA2_POROP/sp|Q6H3C8|PA2AF_TRIST/sp|P17935|PA2HL_VIPAA/sp|O42188|PA2H_GLOHA/sp|Q2YHJ3|PA2A_TRIBO/sp|P14424|PA2BB_VIPAA/sp|C0HK16|PA2BD_DABRR/sp|Q02517…	90,K,D/90,R,D/90,R,D/90,R,D/90,R,D/90,R,D/90,R,D/89,R,D/106,L,D/106,K,D/106,R,E/89,K,D/106,K,D/106,R,E/90,K,D/106,R,D/106,R,K/90,K,Q/106,K,D/105,R,D/106,K,D/106,K,Q/106,K,D/90,R,D/106,K,E/106,K,E/106,R,K/106,K,D/90,K,R/90,K,D/90,K,D/90,R,E/90,R,D/106,R,D/106,K,D/105,R,D/106,R,K/106,R,K/106,R,D/106,K,D/106,K,D/106,K,N/106,K,D/106,R,D/106,K,D/106,K,D/106,K,D/90,K,D/90,R,D/106,K,D/90,K,Q/106,K,D/90,…	0	PLA2(IIA)-Aze2 [Azemiops feae]	Azemiops feae	25.7	25.7	1	1.1	1	151	ABU68548.1
			VSeo_26b.230.230.2 File:"VSeo_26b.raw", NativeID:"controllerType=0 controllerNumber=1 scan=230"	PLA2	VAAICFR	1,Carbonyl[V];5,Carbamidomethyl[C];	850.419	2	0	850.424	-0.004772	8.85384	0.000419679	sp|Q7ZTA6|PA2AB_CROVV/sp|A8CG87|PA2A2_DABRR/sp|Q7T3T5|PA2AB_DABSI/sp|P86389|PA2A2_BOTAS/sp|A8CG78|PA2A2_DABSI/sp|Q7ZTA8|PA2AE_CROVV/sp|Q7ZTA7|PA2AD_CROOA/	106,R,D/106,R,E/98,R,E/92,R,D/106,R,E/106,R,D/106,R,D/	0	phospholipase A2 [Ovophis makazayazaya]	Ovophis makazayazaya	26.1	26.1	1	0.8	1	139	AHJ09527.1
			VSeo_26b.60.60.2 File:"VSeo_26b.raw", NativeID:"controllerType=0 controllerNumber=1 scan=60"	PLA2	QICECDR	3,Carbamidomethyl[C];5,Carbamidomethyl[C];	980.389	2	0	980.392	-0.002935	5.6097	0.00118368	sp|P0DUN0|PA23_BOTHY/sp|Q6H3C7|PA2AD_TRIST/sp|P81243|PA2A_BOTJA/sp|P0CAS3|PA2BC_CRODR/sp|P14421|PA2N_GLOHA/sp|C0HKC4|PA2B1_AGKPC/sp|P51972|PA2B1_AGKPI/sp|P24027|PA2BA_CRODU/sp|F8QN50|PA2HS_VIPRE/sp|P0CV89|PA23_CROAT/sp|Q8QG87|PA2A_BOTIN/sp|P0CG56|PA2BB_CRODU/sp|P0CAS4|PA2BD_CRODR/sp|P17935|PA2HL_VIPAA/sp|P0DUN4|PA2A2_BOTBZ/sp|P0DUN3|PA2A1_BOTBZ/sp|P0CAS2|PA2B6_CRODO/sp|P0CAS5|PA2BE_CRODU/sp|P0CAS…	63,K,V/99,K,A/85,K,V/83,Q,V/83,E,V/83,K,A/83,K,A/99,E,V/99,K,A/54,R,-/99,K,V/83,E,V/83,Q,V/99,K,A/68,X,V/74,K,V/83,E,V/83,E,V/83,E,V/59,E,V/70,K,V/82,E,V/99,K,A/99,K,A/83,E,I/99,K,V/83,K,V/83,K,A/99,K,V/99,E,V/83,E,A/99,K,A/83,K,V/85,K,V/99,K,V/82,E,V/83,K,V/99,E,V/99,K,A/83,K,V/99,K,V/82,E,V/99,E,V/83,E,V/83,E,V/83,E,V/	0	RecName: Full=Acidic phospholipase A2 Ts-A4; Short=svPLA2; AltName: Full=Phosphatidylcholine 2-acylhydrolase; Flags: Precursor [Trimeresurus stejnegeri]	Trimeresurus stejnegeri	28.6	28.6	1	0.11	1	139	Q6H3C7.1
			VSeo_26b.53.53.2 File:"VSeo_26b.raw", NativeID:"controllerType=0 controllerNumber=1 scan=53"	PLA2	LSDCSPK	4,Carbamidomethyl[C];	806.37	2	0	806.371	-0.001142	6.46576	0.00132941	sp|F8QN50|PA2HS_VIPRE/	69,K,T/	0	ammodytin L(2) isoform [Vipera berus berus]	Vipera berus berus	25.2	25.2	1	1.7	1	138	CAE47248.1
			VSeo_26b.255.255.3 File:"VSeo_26b.raw", NativeID:"controllerType=0 controllerNumber=1 scan=255"	VEGF	QVRPFLEVHER	0,Gln->pyro-Glu[AnyN-termQ];	1392.73	3	0	1392.74	-0.006988	10.0115	0.00175262	sp|P83942|TXVE_VIPAP/sp|P67863|TXVE_VIPAA/	0,-,S/24,G,S/	1	vammin-1' [Vipera ammodytes ammodytes]	Vipera ammodytes ammodytes	40.1	40.1	1	2e-05	1	145	APB93447.1
			VSeo_26b.191.191.2 File:"VSeo_26b.raw", NativeID:"controllerType=0 controllerNumber=1 scan=191"	VEGF	HTVDLQIMR	8,Oxidation[M];	1128.58	2	0	1128.58	-0.005755	7.97944	0.00206127	sp|P83942|TXVE_VIPAP/sp|P67863|TXVE_VIPAA/	61,K,V/85,K,V/	0	vammin-1' [Vipera ammodytes ammodytes]	Vipera ammodytes ammodytes	34.1	34.1	1	0.002	1	145	APB93447.1
			VSeo_26b.135.135.2 File:"VSeo_26b.raw", NativeID:"controllerType=0 controllerNumber=1 scan=135"	PLA2	ENGAIVCGSSTP	11,Pent(1)HexNAc(1)[T];	1469.63	2	0	1469.63	-0.004142	7.48086	0.0021508	sp|P17935|PA2HL_VIPAA/	84,R,C/	0	RecName: Full=Basic phospholipase A2 homolog ammodytin L; Short=AMDL; Short=AtnL; Short=svPLA2 homolog; Flags: Precursor [Vipera ammodytes ammodytes]	Vipera ammodytes ammodytes	39.7	39.7	1	4e-05	1	138
			VSeo_26b.126.126.2 File:"VSeo_26b.raw", NativeID:"controllerType=0 controllerNumber=1 scan=126"	PLA2	ENGAIVCGSSTPCK	14,unknown[104.029 Da][K];	1469.63	2	0	1469.64	-0.016354	7.22427	0.00284674	sp|P17935|PA2HL_VIPAA/	84,R,K/	0	RecName: Full=Basic phospholipase A2 homolog ammodytin L; Short=AMDL; Short=AtnL; Short=svPLA2 homolog; Flags: Precursor [Vipera ammodytes ammodytes]	Vipera ammodytes ammodytes	46.9	46.9	1	1e-07	1	138	P17935.1
			VSeo_26b.71.71.2 File:"VSeo_26b.raw", NativeID:"controllerType=0 controllerNumber=1 scan=71"	PLA2	ENGAIVCGSSTPCKK	14,unknown[104.029 Da][K];	1597.72	2	0	1597.74	-0.017804	7.87448	0.00319057	sp|P17935|PA2HL_VIPAA/	84,R,Q/	1	RecName: Full=Basic phospholipase A2 homolog ammodytin L; Short=AMDL; Short=AtnL; Short=svPLA2 homolog; Flags: Precursor [Vipera ammodytes ammodytes]	Vipera ammodytes ammodytes	49.8	49.8	1	2e-08	1	138	P17935.1
			VSeo_26b.128.128.2 File:"VSeo_26b.raw", NativeID:"controllerType=0 controllerNumber=1 scan=128"	PLA2	ENGAIVCGKGT	7,Carbamidomethyl[C];9,Dap-DSP[K];	1469.63	2	0	1469.61	0.020138	5.36441	0.00527525	sp|P14424|PA2BB_VIPAA/sp|P00626|PA2BA_VIPAA/sp|P11407|PA2BC_VIPAA/	84,R,S/84,R,S/84,R,S/	1	ammodytoxin C variant [Vipera aspis aspis]	Vipera aspis aspis	36.7	50.9	1	0.0003	1	138	CAE47282.1
			VSeo_26b.264.264.3 File:"VSeo_26b.raw", NativeID:"controllerType=0 controllerNumber=1 scan=264"	PLA2	NPLTSYSFYGCHCGLGNK	18,glycidamide[K];	2047.89	3	0.031066	2047.9	-0.009434	8.75504	0.0176202	sp|P17935|PA2HL_VIPAA/	31,K,G/	0	RecName: Full=Basic phospholipase A2 homolog ammodytin L; Short=AMDL; Short=AtnL; Short=svPLA2 homolog; Flags: Precursor [Vipera ammodytes ammodytes]	Vipera ammodytes ammodytes	62.6	62.6	1	9e-13	1	138	P17935.1
			VSeo_26b.51.51.2 File:"VSeo_26b.raw", NativeID:"controllerType=0 controllerNumber=1 scan=51"	PLA2	KQICECDR	4,Carbamidomethyl[C];6,Carbamidomethyl[C];	1108.48	2	0.031066	1108.49	-0.00646	4.80706	0.0218165	sp|P0DUN0|PA23_BOTHY/sp|Q6H3C7|PA2AD_TRIST/sp|P81243|PA2A_BOTJA/sp|C0HKC4|PA2B1_AGKPC/sp|P51972|PA2B1_AGKPI/sp|F8QN50|PA2HS_VIPRE/sp|Q8QG87|PA2A_BOTIN/sp|P17935|PA2HL_VIPAA/sp|P0DUN3|PA2A1_BOTBZ/sp|P84397|PA2A2_BOTIN/sp|Q71QE8|PA2BN_CROVV/sp|Q805A2|PA2BN_PROFL/sp|Q6EER4|PA2B_BOTSC/sp|Q6EER5|PA2B_CERGO/sp|Q6EER6|PA2B_SISMS/sp|Q2HZ28|PA2A_BOTER/sp|Q9PVF2|PA2AE_CALRH/sp|P86907|PA2A_BOTAM/sp|P86389|P…	62,K,V/98,K,A/84,K,V/82,K,A/82,K,A/98,K,A/98,K,V/98,K,A/73,K,V/69,Q,V/98,E,A/98,E,A/98,E,V/82,E,V/82,E,A/98,K,V/98,K,A/82,K,V/84,K,V/98,K,V/82,K,V/98,K,A/82,K,V/98,K,V/	1	RecName: Full=Acidic phospholipase A2 Ts-A4; Short=svPLA2; AltName: Full=Phosphatidylcholine 2-acylhydrolase; Flags: Precursor [Trimeresurus stejnegeri]	Trimeresurus stejnegeri	31.6	31.6	1	0.012	1	139	Q6H3C7.1
			VSeo_26b.83.83.2 File:"VSeo_26b.raw", NativeID:"controllerType=0 controllerNumber=1 scan=83"	PLA2	MIQEETEK		1007.47	2	0.031066	1007.47	-0.004131	6.50555	0.0227838	sp|F8QN50|PA2HS_VIPRE/sp|P0DKL7|PA2HA_VIPRE/	23,K,N/7,L,N/	0	ammodytin L(2) isoform [Vipera berus berus]	Vipera berus berus	30.8	30.8	1	0.023	1	138	CAE47248.1
			VSeo_26b.266.266.3 File:"VSeo_26b.raw", NativeID:"controllerType=0 controllerNumber=1 scan=266"	PLA2	NPLTSYSFYGCHCGLGNK	18,glycidamide[K];	2047.89	3	0.031066	2047.9	-0.007786	6.87036	0.0282397	sp|P17935|PA2HL_VIPAA/	31,K,G/	0	RecName: Full=Basic phospholipase A2 homolog ammodytin L; Short=AMDL; Short=AtnL; Short=svPLA2 homolog; Flags: Precursor [Vipera ammodytes ammodytes]	Vipera ammodytes ammodytes	62.6	62.6	1	9e-13	1	138	P17935.1
			VSeo_26b.254.254.2 File:"VSeo_26b.raw", NativeID:"controllerType=0 controllerNumber=1 scan=254"	PLA2	SVIEFGK	0,Acetyl[ProteinN-term];	821.437	2	0.031066	821.44	-0.003556	5.87493	0.0386597	sp|P17935|PA2HL_VIPAA/	16,G,M/	0	ammodytin L(2) isoform [Vipera berus berus]	Vipera berus berus	24.8	24.8	1	2.4	1	138	CAE47248.1
			VSeo_26b.35.35.2 File:"VSeo_26b.raw", NativeID:"controllerType=0 controllerNumber=1 scan=35"	PLA2	TYNKK		653.362	2	0.031066	653.362	-0.000112	4.37683	0.0561659	sp|P04361|PA2HB_AGKPI/sp|Q2YHJ4|PA2HB_TRIBO/sp|Q2YHJ8|PA2HB_TRIPE/sp|Q8UVZ7|PA2H_CROAT/sp|P0DUN7|PA2H_LACMU/sp|Q8UVU7|PA2HB_CERGO/sp|F8QN50|PA2HS_VIPRE/sp|A0A1S5XW05|PA2HP_BOTMO/sp|P24294|PA2A2_ERIMA/sp|P86803|PA2B1_BOTMA/sp|P86804|PA2B2_BOTMA/sp|P49121|PA2H1_AGKCL/sp|P82287|PA2H2_BOTPI/sp|P48650|PA2HS_ECHCA/sp|P17935|PA2HL_VIPAA/sp|C7G1G6|PA2B3_PROFL/sp|P31854|PA2B_VIPBB/sp|Q6JK69|PA2H1_BOTAT/sp…	101,D,Y/117,G,E/117,D,E/117,D,Y/101,D,Y/117,N,Y/117,K,Y/117,D,Y/101,N,Y/101,G,Y/101,G,Y/117,D,Y/101,G,Y/101,N,Y/117,K,Y/118,G,Y/117,N,Y/117,D,Y/117,D,Y/117,D,Y/101,G,Y/92,G,Y/117,Q,Y/100,N,Y/101,G,Y/118,G,Y/101,G,Y/101,R,Y/118,G,Y/101,G,R/117,N,Y/101,D,Y/101,N,Y/100,G,Y/101,N,Y/101,D,Y/117,D,Y/117,D,Q/117,K,Y/102,G,Y/101,D,Y/101,N,Y/117,G,Y/117,R,E/100,K,Y/101,N,Y/	1	ammodytin L(2) isoform [Vipera berus berus]	Vipera berus berus	19.7	19.7	1	96	1	138	CAE47248.1
			VSeo_26b.143.143.2 File:"VSeo_26b.raw", NativeID:"controllerType=0 controllerNumber=1 scan=143"	svMP	CTCYGSSECIM	0,unknown[217.157 Da][AnyN-term];3,Carbamidomethyl[C];	1470.61	2	0.031066	1470.59	0.024531	3.13595	0.0877158	sp|P30403|VM2RH_CALRH/	344,Y,S/	0	RecName: Full=Zinc metalloproteinase/disintegrin; Contains: RecName: Full=Snake venom metalloproteinase rhodostoxin; Short=SVMP; AltName: Full=Hemorrhagic protein; Contains: RecName: Full=Disintegrin rhodostomin; Short=RHO; Short=RHOD; AltName: Full=Disintegrin kistrin; AltName: Full=Platelet aggregation activation inhibitor; Flags: Precursor [Calloselasma rhodostoma]	Calloselasma rhodostoma	42.2	42.2	1	4e-06	1	478	P30403.2
			VSeo_26b.50.50.2 File:"VSeo_26b.raw", NativeID:"controllerType=0 controllerNumber=1 scan=50"	VEGF	CTPVGK	1,Carbamidomethyl[C];	661.334	2	0.0744	661.334	-0.0002	2.68133	0.302966	sp|P67861|TXVE_DABRR/sp|P83942|TXVE_VIPAP/sp|P0DL42|TXVE_DABSI/sp|P67863|TXVE_VIPAA/sp|P82475|TXVE2_MACLB/	79,K,H/55,K,H/55,K,H/79,K,H/55,K,H/	0	vammin-1' [Vipera ammodytes ammodytes]	Vipera ammodytes ammodytes	22.3	22.3	1	14	1	145	APB93447.1
			VSeo_26b.44.44.2 File:"VSeo_26b.raw", NativeID:"controllerType=0 controllerNumber=1 scan=44"	PLA2	CKGVSEK	1,Carbamidomethyl[C];	807.402	2	0.0744	807.403	-0.00061	1.00245	0.317543	sp|P17935|PA2HL_VIPAA/	130,K,C/	1	ammodytin L(2) isoform [Vipera berus berus]	Vipera berus berus	24.8	24.8	1	2.4	1	138	CAE47248.1
			VSeo_26b.47.47.2 File:"VSeo_26b.raw", NativeID:"controllerType=0 controllerNumber=1 scan=47"	PLA2	GVSEKC	6,Carbamidomethyl[C];	679.307	2	0.0744	679.308	-0.001357	1.6653	0.334324	sp|P17935|PA2HL_VIPAA/	132,K,-/	1	ammodytin L(2) isoform [Vipera berus berus]	Vipera berus berus	21.8	21.8	1	22	1	138	CAE47248.1
			VSeo_26b.86.86.2 File:"VSeo_26b.raw", NativeID:"controllerType=0 controllerNumber=1 scan=86"	PLA2	VTECDPK	4,Carbamidomethyl[C];	848.379	2	0.0744	848.382	-0.002977	0.705501	0.34961	sp|P82896|PA2A5_TRIST/	53,K,M/	0	RecName: Full=Acidic phospholipase A2 5; Short=svPLA2; AltName: Full=PLA2-V; AltName: Full=Phosphatidylcholine 2-acylhydrolase [Trimeresurus stejnegeri]	Trimeresurus stejnegeri	26.5	26.5	1	0.61	1	122	P82896.1
			VSeo_26b.105.105.2 File:"VSeo_26b.raw", NativeID:"controllerType=0 controllerNumber=1 scan=105"	VEGF	CSGCCTDESLK	1,Carbamidomethyl[C];4,Carbamidomethyl[C];5,Carbamidomethyl[C];	1316.48	2	0.0744	1316.49	-0.007929	1.00798	0.4944	sp|P83942|TXVE_VIPAP/sp|P67863|TXVE_VIPAA/sp|P82475|TXVE2_MACLB/	44,R,C/68,R,C/44,R,C/	0	vammin-1' [Vipera ammodytes ammodytes]	Vipera ammodytes ammodytes	39.2	39.2	1	4e-05	1	145	APB93447.1
			VSeo_26b.219.219.2 File:"VSeo_26b.raw", NativeID:"controllerType=0 controllerNumber=1 scan=219"	PLA2	LGNKGKPK	3,Deamidated[N];	842.504	2	0.639	842.509	-0.005066	1.85909	0.9492	sp|P17935|PA2HL_VIPAA/	45,G,D/	2	RecName: Full=Basic phospholipase A2 homolog ammodytin L; Short=AMDL; Short=AtnL; Short=svPLA2 homolog; Flags: Precursor [Vipera ammodytes ammodytes]	Vipera ammodytes ammodytes	26.9	26.9	1	0.53	1	138	P17935.1
			VSeo_26c.162.162.3 File:"VSeo_26c.raw", NativeID:"controllerType=0 controllerNumber=1 scan=162"	PLA2	CCFVHSCCYAK	1,Carbamidomethyl[C];2,Carbamidomethyl[C];7,Carbamidomethyl[C];8,Carbamidomethyl[C];	1491.56	3	0	1491.56	-0.006941	12.9302	0.0296878	sp|F8QN50|PA2HS_VIPRE/sp|P17935|PA2HL_VIPAA/	58,R,L/58,R,L/	0	ammodytin L(2) isoform [Vipera berus berus]	Vipera berus berus	43.1	43.1	1	2e-06	1	138	CAE47248.1
			VSeo_26c.186.186.2 File:"VSeo_26c.raw", NativeID:"controllerType=0 controllerNumber=1 scan=186"	VEGF	PSCVAVLR	3,Carbamidomethyl[C];	901.489	2	0	901.492	-0.003845	11.7008	0.0363897	sp|C0K3N1|TXVE_BITAR/sp|P67861|TXVE_DABRR/sp|P83942|TXVE_VIPAP/sp|P0DL42|TXVE_DABSI/sp|P67863|TXVE_VIPAA/sp|P82475|TXVE2_MACLB/	60,R,C/60,R,C/36,R,C/36,R,C/60,R,C/36,R,C/	0	RecName: Full=Snake venom vascular endothelial growth factor toxin barietin; Short=svVEGF; AltName: Full=VEGF-F; Flags: Precursor [Bitis arietans]	Bitis arietans	28.2	28.2	1	0.18	1	150	C0K3N1.1
			VSeo_26c.90.90.2 File:"VSeo_26c.raw", NativeID:"controllerType=0 controllerNumber=1 scan=90"	VEGF	CSGCCTDESLK	1,Carbamidomethyl[C];4,Carbamidomethyl[C];5,Carbamidomethyl[C];	1316.48	2	0	1316.49	-0.008173	8.31246	0.0576998	sp|P83942|TXVE_VIPAP/sp|P67863|TXVE_VIPAA/sp|P82475|TXVE2_MACLB/	44,R,C/68,R,C/44,R,C/	0	vammin-1' [Vipera ammodytes ammodytes]	Vipera ammodytes ammodytes	39.2	39.2	1	4e-05	1	145	APB93447.1
			VSeo_26c.194.194.3 File:"VSeo_26c.raw", NativeID:"controllerType=0 controllerNumber=1 scan=194"	VEGF	PFLEVHER		1026.53	3	0	1026.54	-0.003482	11.1344	0.0603152	sp|P83942|TXVE_VIPAP/sp|P67863|TXVE_VIPAA/	3,R,S/27,R,S/	0	vammin-1' [Vipera ammodytes ammodytes]	Vipera ammodytes ammodytes	30.3	30.3	1	0.031	1	145	APB93447.1
			VSeo_26c.242.242.3 File:"VSeo_26c.raw", NativeID:"controllerType=0 controllerNumber=1 scan=242"	VEGF	QVRPFLEVHER	0,Gln->pyro-Glu[AnyN-termQ];	1392.73	3	0	1392.74	-0.007537	11.4006	0.0717569	sp|P83942|TXVE_VIPAP/sp|P67863|TXVE_VIPAA/	0,-,S/24,G,S/	1	vammin-1' [Vipera ammodytes ammodytes]	Vipera ammodytes ammodytes	40.1	40.1	1	2e-05	1	145	APB93447.1
			VSeo_26c.74.74.3 File:"VSeo_26c.raw", NativeID:"controllerType=0 controllerNumber=1 scan=74"	VEGF	FTEHTACECRPR	7,Carbamidomethyl[C];9,Carbamidomethyl[C];	1563.67	3	0	1563.68	-0.008169	4.62543	0.116947	sp|P83942|TXVE_VIPAP/sp|P67863|TXVE_VIPAA/sp|P82475|TXVE2_MACLB/	84,K,R/108,K,R/84,K,R/	1	vammin-1' [Vipera ammodytes ammodytes]	Vipera ammodytes ammodytes	44.8	44.8	1	5e-07	1	145	APB93447.1
			VSeo_26c.56.56.2 File:"VSeo_26c.raw", NativeID:"controllerType=0 controllerNumber=1 scan=56"	PLA2	LSDCSPK	4,Carbamidomethyl[C];	806.37	2	0	806.371	-0.001447	2.877	0.347032	sp|F8QN50|PA2HS_VIPRE/	69,K,T/	0	ammodytin L(2) isoform [Vipera berus berus]	Vipera berus berus	25.2	25.2	1	1.7	1	138	CAE47248.1
			VSeo_26c.143.143.2 File:"VSeo_26c.raw", NativeID:"controllerType=0 controllerNumber=1 scan=143"	PLA2	DYGCFCGKGGHGR	4,Carbamidomethyl[C];6,Carbamidomethyl[C];	1470.61	2	0.13923	1470.6	0.013748	0.001	0.531181	sp|P82896|PA2A5_TRIST/	22,S,P/	1	phospholipase A2 [Trimeresurus cardamomensis]	Trimeresurus cardamomensis	46	46	1	2e-07	1	138	AHJ09588.1
			VSeo_26c.197.197.2 File:"VSeo_26c.raw", NativeID:"controllerType=0 controllerNumber=1 scan=197"	PLA2	AAAICFRR	5,Carbamidomethyl[C];9,Arg-loss[AnyC-termR];	808.409	2	0.46543	808.413	-0.004759	8.80576	0.657626	sp|P86368|PA2B3_DABRR/	90,K,N/	1	PLA2(IIA)-Aze2 [Azemiops feae]	Azemiops feae	29.1	29.1	1	0.088	1	151	ABU68548.1
			VSeo_26c.219.219.2 File:"VSeo_26c.raw", NativeID:"controllerType=0 controllerNumber=1 scan=219"	VEGF	HTVDLQIMR		1112.58	2	0.14231	1112.59	-0.006323	5.41363	0.708013	sp|P83942|TXVE_VIPAP/sp|P67863|TXVE_VIPAA/	61,K,V/85,K,V/	0	vammin-1' [Vipera ammodytes ammodytes]	Vipera ammodytes ammodytes	34.1	34.1	1	0.002	1	145	APB93447.1
			VSeo_26c.200.200.2 File:"VSeo_26c.raw", NativeID:"controllerType=0 controllerNumber=1 scan=200"	PLA2	AAAICFR	5,Carbamidomethyl[C];	808.41	2	0.1792	808.413	-0.003059	8.14058	0.741063	sp|P81478|PA2A2_TRIGA/sp|P14418|PA2A_GLOHA/sp|P0DKU1|PA2H_GLOUS/sp|O42190|PA2A6_GLOHA/sp|O42189|PA2A5_GLOHA/sp|C0HKC4|PA2B1_AGKPC/sp|P51972|PA2B1_AGKPI/sp|Q91506|PA2A1_PROMU/sp|P00625|PA2A1_OVOOK/sp|P18998|PA2HA_CROSS/sp|F8QN50|PA2HS_VIPRE/sp|C0HLF0|PA2_POROP/sp|Q6H3C8|PA2AF_TRIST/sp|P17935|PA2HL_VIPAA/sp|O42188|PA2H_GLOHA/sp|Q2YHJ3|PA2A_TRIBO/sp|P14424|PA2BB_VIPAA/sp|C0HK16|PA2BD_DABRR/sp|Q02517…	90,K,D/90,R,D/90,R,D/90,R,D/90,R,D/90,R,D/90,R,D/89,R,D/106,L,D/106,K,D/106,R,E/89,K,D/106,K,D/106,R,E/90,K,D/106,R,D/106,R,K/90,K,Q/106,K,D/105,R,D/106,K,D/106,K,Q/106,K,D/90,R,D/106,K,E/106,K,E/106,R,K/106,K,D/90,K,R/90,K,D/90,K,D/90,R,E/90,R,D/106,R,D/106,K,D/105,R,D/106,R,K/106,R,K/106,R,D/106,K,D/106,K,D/106,K,N/106,K,D/106,R,D/106,K,D/106,K,D/106,K,D/90,K,D/90,R,D/106,K,D/90,K,Q/106,K,D/90,…	0	PLA2(IIA)-Aze2 [Azemiops feae]	Azemiops feae	25.7	25.7	1	1.1	1	151	ABU68548.1
			VSeo_26c.47.47.2 File:"VSeo_26c.raw", NativeID:"controllerType=0 controllerNumber=1 scan=47"	VEGF	CTPVGK	1,Carbamidomethyl[C];	661.333	2	0.1792	661.334	-0.001116	1.92107	0.803016	sp|P67861|TXVE_DABRR/sp|P83942|TXVE_VIPAP/sp|P0DL42|TXVE_DABSI/sp|P67863|TXVE_VIPAA/sp|P82475|TXVE2_MACLB/	79,K,H/55,K,H/55,K,H/79,K,H/55,K,H/	0	vammin-1' [Vipera ammodytes ammodytes]	Vipera ammodytes ammodytes	22.3	22.3	1	14	1	145	APB93447.1
			VSeo_26c.146.146.2 File:"VSeo_26c.raw", NativeID:"controllerType=0 controllerNumber=1 scan=146"	VEGF	CSGCCTDESLK	0,Acetyl[ProteinN-term];4,GG[C](Dicarbamidomethyl[C]);5,Carbamidomethyl[C];	1358.5	2	0.1792	1358.5	-0.006896	1.01081	0.832284	sp|P83942|TXVE_VIPAP/sp|P67863|TXVE_VIPAA/sp|P82475|TXVE2_MACLB/	44,R,C/68,R,C/44,R,C/	0	vammin-1' [Vipera ammodytes ammodytes]	Vipera ammodytes ammodytes	39.2	39.2	1	4e-05	1	145	APB93447.1
			VSeo_26c.59.59.2 File:"VSeo_26c.raw", NativeID:"controllerType=0 controllerNumber=1 scan=59"	PLA2	QICECDR	3,Carbamidomethyl[C];5,Carbamidomethyl[C];	980.388	2	0.1792	980.392	-0.003973	2.93684	0.836363	sp|P0DUN0|PA23_BOTHY/sp|Q6H3C7|PA2AD_TRIST/sp|P81243|PA2A_BOTJA/sp|P0CAS3|PA2BC_CRODR/sp|P14421|PA2N_GLOHA/sp|C0HKC4|PA2B1_AGKPC/sp|P51972|PA2B1_AGKPI/sp|P24027|PA2BA_CRODU/sp|F8QN50|PA2HS_VIPRE/sp|P0CV89|PA23_CROAT/sp|Q8QG87|PA2A_BOTIN/sp|P0CG56|PA2BB_CRODU/sp|P0CAS4|PA2BD_CRODR/sp|P17935|PA2HL_VIPAA/sp|P0DUN4|PA2A2_BOTBZ/sp|P0DUN3|PA2A1_BOTBZ/sp|P0CAS2|PA2B6_CRODO/sp|P0CAS5|PA2BE_CRODU/sp|P0CAS…	63,K,V/99,K,A/85,K,V/83,Q,V/83,E,V/83,K,A/83,K,A/99,E,V/99,K,A/54,R,-/99,K,V/83,E,V/83,Q,V/99,K,A/68,X,V/74,K,V/83,E,V/83,E,V/83,E,V/59,E,V/70,K,V/82,E,V/99,K,A/99,K,A/83,E,I/99,K,V/83,K,V/83,K,A/99,K,V/99,E,V/83,E,A/99,K,A/83,K,V/85,K,V/99,K,V/82,E,V/83,K,V/99,E,V/99,K,A/83,K,V/99,K,V/82,E,V/99,E,V/83,E,V/83,E,V/83,E,V/	0	RecName: Full=Acidic phospholipase A2 Ts-A4; Short=svPLA2; AltName: Full=Phosphatidylcholine 2-acylhydrolase; Flags: Precursor [Trimeresurus stejnegeri]	Trimeresurus stejnegeri	28.6	28.6	1	0.11	1	139	Q6H3C7.1
			VSeo_26c.185.185.2 File:"VSeo_26c.raw", NativeID:"controllerType=0 controllerNumber=1 scan=185"	VEGF	HTVDLQIMR	8,Oxidation[M];	1128.58	2	0.1792	1128.58	-0.007464	5.9394	0.841818	sp|P83942|TXVE_VIPAP/sp|P67863|TXVE_VIPAA/	61,K,V/85,K,V/	0	vammin-1' [Vipera ammodytes ammodytes]	Vipera ammodytes ammodytes	34.1	34.1	1	0.002	1	145	APB93447.1
			VSeo_26c.78.78.2 File:"VSeo_26c.raw", NativeID:"controllerType=0 controllerNumber=1 scan=78"	PLA2	MIQEETEK		1007.47	2	0.26156	1007.47	-0.005108	1.01553	0.920692	sp|F8QN50|PA2HS_VIPRE/sp|P0DKL7|PA2HA_VIPRE/	23,K,N/7,L,N/	0	ammodytin L(2) isoform [Vipera berus berus]	Vipera berus berus	30.8	30.8	1	0.023	1	138	CAE47248.1
			VSeo_26c.30.30.2 File:"VSeo_26c.raw", NativeID:"controllerType=0 controllerNumber=1 scan=30"	PLA2	RCCFVHDCCYGK	0,unknown[196.085 Da][111][ProteinN-term];2,Carbamidomethyl[C];3,GG[C](Dicarbamidomethyl[C]);8,Carbamidomethyl[C];	1772.68	2	0.26994	1772.68	0.006472	0.992785	0.937664	sp|P81478|PA2A2_TRIGA/sp|P0DUN0|PA23_BOTHY/sp|Q9PVF1|PA2AA_CALRH/sp|P86456|PA2A4_BOTAL/sp|Q7ZTA6|PA2AB_CROVV/sp|Q6H3C7|PA2AD_TRIST/sp|P81243|PA2A_BOTJA/sp|P14418|PA2A_GLOHA/sp|P20476|PA2A1_TRIGA/sp|B3EWP6|PA2_LACMR/sp|P81479|PA2A4_TRIGA/sp|O42190|PA2A6_GLOHA/sp|Q9PVF0|PA2AB_CALRH/sp|Q800C1|PA2AH_CROVV/sp|C0HKC4|PA2B1_AGKPC/sp|P51972|PA2B1_AGKPI/sp|Q91506|PA2A1_PROMU/sp|P24027|PA2BA_CRODU/sp|P0062…	41,D,V/37,D,N/44,D,V/40,D,V/57,D,V/57,D,V/41,D,V/41,D,V/57,D,V/41,D,V/41,D,V/41,D,V/44,D,V/57,D,A/41,D,V/41,D,V/41,D,V/57,D,L/57,D,V/41,D,V/57,D,L/41,D,V/57,D,V/57,D,A/57,D,V/57,D,V/41,D,L/41,D,L/57,D,L/33,S,-/41,D,V/41,D,V/41,D,V/41,D,V/57,D,V/41,D,V/41,D,L/41,D,L/24,G,W/57,D,V/57,D,V/57,D,V/57,D,L/40,D,A/57,D,L/57,D,L/57,D,L/57,D,A/57,D,V/57,D,L/41,D,V/41,D,V/42,D,L/57,D,V/41,D,V/57,D,V/57,D,A/…	1	RecName: Full=Phospholipase A2 3; Short=BdsPLA2 III; Short=svPLA2; AltName: Full=Phosphatidylcholine 2-acylhydrolase [Bothrops diporus]	Bothrops diporus	47.3	47.3	1	5e-08	1	45	C0HJP9.1
			VSeo_26c.216.216.2 File:"VSeo_26c.raw", NativeID:"controllerType=0 controllerNumber=1 scan=216"	PLA2	GSVIEFGK		836.448	2	0.26994	836.451	-0.002855	3.33733	0.954079	sp|P17935|PA2HL_VIPAA/	15,E,M/	0	ammodytin L(2) isoform [Vipera berus berus]	Vipera berus berus	27.4	27.4	1	0.38	1	138	CAE47248.1
			VSeo_26c.32.32.2 File:"VSeo_26c.raw", NativeID:"controllerType=0 controllerNumber=1 scan=32"	PLA2	TYNKK		653.362	2	0.26994	653.362	0.000804	1.86118	0.964292	sp|P04361|PA2HB_AGKPI/sp|Q2YHJ4|PA2HB_TRIBO/sp|Q2YHJ8|PA2HB_TRIPE/sp|Q8UVZ7|PA2H_CROAT/sp|P0DUN7|PA2H_LACMU/sp|Q8UVU7|PA2HB_CERGO/sp|F8QN50|PA2HS_VIPRE/sp|A0A1S5XW05|PA2HP_BOTMO/sp|P24294|PA2A2_ERIMA/sp|P86803|PA2B1_BOTMA/sp|P86804|PA2B2_BOTMA/sp|P49121|PA2H1_AGKCL/sp|P82287|PA2H2_BOTPI/sp|P48650|PA2HS_ECHCA/sp|P17935|PA2HL_VIPAA/sp|C7G1G6|PA2B3_PROFL/sp|P31854|PA2B_VIPBB/sp|Q6JK69|PA2H1_BOTAT/sp…	101,D,Y/117,G,E/117,D,E/117,D,Y/101,D,Y/117,N,Y/117,K,Y/117,D,Y/101,N,Y/101,G,Y/101,G,Y/117,D,Y/101,G,Y/101,N,Y/117,K,Y/118,G,Y/117,N,Y/117,D,Y/117,D,Y/117,D,Y/101,G,Y/92,G,Y/117,Q,Y/100,N,Y/101,G,Y/118,G,Y/101,G,Y/101,R,Y/118,G,Y/101,G,R/117,N,Y/101,D,Y/101,N,Y/100,G,Y/101,N,Y/101,D,Y/117,D,Y/117,D,Q/117,K,Y/102,G,Y/101,D,Y/101,N,Y/117,G,Y/117,R,E/100,K,Y/101,N,Y/	1	ammodytin L(2) isoform [Vipera berus berus]	Vipera berus berus	19.7	19.7	1	96	1	138	CAE47248.1
			VSeo_26c.203.203.2 File:"VSeo_26c.raw", NativeID:"controllerType=0 controllerNumber=1 scan=203"	PLA2	LGNKGKPK	3,Deamidated[N];	842.506	2	0.64659	842.509	-0.003723	3.27691	0.999563	sp|P17935|PA2HL_VIPAA/	45,G,D/	2	RecName: Full=Basic phospholipase A2 homolog ammodytin L; Short=AMDL; Short=AtnL; Short=svPLA2 homolog; Flags: Precursor [Vipera ammodytes ammodytes]	Vipera ammodytes ammodytes	26.9	26.9	1	0.53	1	138	P17935.1
			VSeo_27b.260.260.2 File:"VSeo_27b.raw", NativeID:"controllerType=0 controllerNumber=1 scan=260"	svMP	LFCEILP	3,Carbamidomethyl[C];7,Pro->Lys[P];	922.501	2	0	922.507	-0.005162	7.93945	0.5	sp|C0LZJ5|VM3LC_MACLN/	160,R,N/	0	metalloproteinase of class P-III MPIII-1 [Vipera ammodytes ammodytes]	Vipera ammodytes ammodytes	27.4	27.4	1	0.27	1	607	AMB36352.1
			VSeo_27c.163.163.3 File:"VSeo_27c.raw", NativeID:"controllerType=0 controllerNumber=1 scan=163"	PLA2	CCFVHSCCYAK	1,Carbamidomethyl[C];2,Carbamidomethyl[C];7,Carbamidomethyl[C];8,Carbamidomethyl[C];	1491.56	3	0	1491.56	-0.008131	15.6752	8.48587e-06	sp|F8QN50|PA2HS_VIPRE/sp|P17935|PA2HL_VIPAA/	58,R,L/58,R,L/	0	ammodytin L(2) isoform [Vipera berus berus]	Vipera berus berus	43.1	43.1	1	2e-06	1	138	CAE47248.1
			VSeo_27c.193.193.3 File:"VSeo_27c.raw", NativeID:"controllerType=0 controllerNumber=1 scan=193"	VEGF	PFLEVHER		1026.53	3	0	1026.54	-0.002933	10.0763	7.05541e-05	sp|P83942|TXVE_VIPAP/sp|P67863|TXVE_VIPAA/	3,R,S/27,R,S/	0	vammin-1' [Vipera ammodytes ammodytes]	Vipera ammodytes ammodytes	30.3	30.3	1	0.031	1	145	APB93447.1
			VSeo_27c.196.196.2 File:"VSeo_27c.raw", NativeID:"controllerType=0 controllerNumber=1 scan=196"	PLA2	AAAICFR	5,Carbamidomethyl[C];	808.41	2	0	808.413	-0.003608	7.89444	0.000329133	sp|P81478|PA2A2_TRIGA/sp|P14418|PA2A_GLOHA/sp|P0DKU1|PA2H_GLOUS/sp|O42190|PA2A6_GLOHA/sp|O42189|PA2A5_GLOHA/sp|C0HKC4|PA2B1_AGKPC/sp|P51972|PA2B1_AGKPI/sp|Q91506|PA2A1_PROMU/sp|P00625|PA2A1_OVOOK/sp|P18998|PA2HA_CROSS/sp|F8QN50|PA2HS_VIPRE/sp|C0HLF0|PA2_POROP/sp|Q6H3C8|PA2AF_TRIST/sp|P17935|PA2HL_VIPAA/sp|O42188|PA2H_GLOHA/sp|Q2YHJ3|PA2A_TRIBO/sp|P14424|PA2BB_VIPAA/sp|C0HK16|PA2BD_DABRR/sp|Q02517…	90,K,D/90,R,D/90,R,D/90,R,D/90,R,D/90,R,D/90,R,D/89,R,D/106,L,D/106,K,D/106,R,E/89,K,D/106,K,D/106,R,E/90,K,D/106,R,D/106,R,K/90,K,Q/106,K,D/105,R,D/106,K,D/106,K,Q/106,K,D/90,R,D/106,K,E/106,K,E/106,R,K/106,K,D/90,K,R/90,K,D/90,K,D/90,R,E/90,R,D/106,R,D/106,K,D/105,R,D/106,R,K/106,R,K/106,R,D/106,K,D/106,K,D/106,K,N/106,K,D/106,R,D/106,K,D/106,K,D/106,K,D/90,K,D/90,R,D/106,K,D/90,K,Q/106,K,D/90,…	0	PLA2(IIA)-Aze2 [Azemiops feae]	Azemiops feae	25.7	25.7	1	1.1	1	151	ABU68548.1
			VSeo_27c.250.250.3 File:"VSeo_27c.raw", NativeID:"controllerType=0 controllerNumber=1 scan=250"	PLA2	NPLTSYSFYGCYCGVGGK	11,unknown[132.058 Da][C];	2047.89	3	0	2047.89	-0.001495	7.72427	0.000368998	sp|P14424|PA2BB_VIPAA/sp|F8QN54|PA2B_VIPRE/sp|P00626|PA2BA_VIPAA/sp|P11407|PA2BC_VIPAA/	31,K,G/31,K,G/31,K,G/31,K,G/	0	ammodytoxin C variant [Vipera aspis aspis]	Vipera aspis aspis	62.1	62.1	1	1e-12	1	138	CAE47282.1
			VSeo_27c.181.181.2 File:"VSeo_27c.raw", NativeID:"controllerType=0 controllerNumber=1 scan=181"	VEGF	HTVDLQIMR	8,Oxidation[M];	1128.58	2	0	1128.58	-0.0049	8.05546	0.000456644	sp|P83942|TXVE_VIPAP/sp|P67863|TXVE_VIPAA/	61,K,V/85,K,V/	0	vammin-1' [Vipera ammodytes ammodytes]	Vipera ammodytes ammodytes	34.1	34.1	1	0.002	1	145	APB93447.1
			VSeo_27c.238.238.3 File:"VSeo_27c.raw", NativeID:"controllerType=0 controllerNumber=1 scan=238"	VEGF	VRPFLEVHER	0,unknown[196.085 Da][111][ProteinN-term];	1392.73	3	0	1392.74	-0.007084	13.556	0.000510352	sp|P83942|TXVE_VIPAP/sp|P67863|TXVE_VIPAA/	1,Q,S/25,Q,S/	1	vammin-1' [Vipera ammodytes ammodytes]	Vipera ammodytes ammodytes	36.7	36.7	1	0.0003	1	145	APB93447.1
			VSeo_27c.187.187.2 File:"VSeo_27c.raw", NativeID:"controllerType=0 controllerNumber=1 scan=187"	VEGF	PSCVAVLR	3,Carbamidomethyl[C];	901.487	2	0	901.492	-0.004944	7.18284	0.000918748	sp|C0K3N1|TXVE_BITAR/sp|P67861|TXVE_DABRR/sp|P83942|TXVE_VIPAP/sp|P0DL42|TXVE_DABSI/sp|P67863|TXVE_VIPAA/sp|P82475|TXVE2_MACLB/	60,R,C/60,R,C/36,R,C/36,R,C/60,R,C/36,R,C/	0	RecName: Full=Snake venom vascular endothelial growth factor toxin barietin; Short=svVEGF; AltName: Full=VEGF-F; Flags: Precursor [Bitis arietans]	Bitis arietans	28.2	28.2	1	0.18	1	150	C0K3N1.1
			VSeo_27c.217.217.2 File:"VSeo_27c.raw", NativeID:"controllerType=0 controllerNumber=1 scan=217"	PLA2	GSVIEFGK		836.447	2	0	836.451	-0.004015	5.16637	0.00098182	sp|P17935|PA2HL_VIPAA/	15,E,M/	0	ammodytin L(2) isoform [Vipera berus berus]	Vipera berus berus	27.4	27.4	1	0.38	1	138	CAE47248.1
			VSeo_27c.85.85.2 File:"VSeo_27c.raw", NativeID:"controllerType=0 controllerNumber=1 scan=85"	VEGF	CSGCCTDESLK	1,Carbamidomethyl[C];4,Carbamidomethyl[C];5,Carbamidomethyl[C];	1316.48	2	0	1316.49	-0.008173	6.88812	0.00108631	sp|P83942|TXVE_VIPAP/sp|P67863|TXVE_VIPAA/sp|P82475|TXVE2_MACLB/	44,R,C/68,R,C/44,R,C/	0	vammin-1' [Vipera ammodytes ammodytes]	Vipera ammodytes ammodytes	39.2	39.2	1	4e-05	1	145	APB93447.1
			VSeo_27c.221.221.2 File:"VSeo_27c.raw", NativeID:"controllerType=0 controllerNumber=1 scan=221"	VEGF	HTVDLQIMR		1112.58	2	0	1112.59	-0.003882	5.4778	0.00383845	sp|P83942|TXVE_VIPAP/sp|P67863|TXVE_VIPAA/	61,K,V/85,K,V/	0	vammin-1' [Vipera ammodytes ammodytes]	Vipera ammodytes ammodytes	34.1	34.1	1	0.002	1	145	APB93447.1
			VSeo_27c.61.61.2 File:"VSeo_27c.raw", NativeID:"controllerType=0 controllerNumber=1 scan=61"	PLA2	QICECDR	3,Carbamidomethyl[C];5,Carbamidomethyl[C];	980.391	2	0	980.392	-0.001836	4.60134	0.00434792	sp|P0DUN0|PA23_BOTHY/sp|Q6H3C7|PA2AD_TRIST/sp|P81243|PA2A_BOTJA/sp|P0CAS3|PA2BC_CRODR/sp|P14421|PA2N_GLOHA/sp|C0HKC4|PA2B1_AGKPC/sp|P51972|PA2B1_AGKPI/sp|P24027|PA2BA_CRODU/sp|F8QN50|PA2HS_VIPRE/sp|P0CV89|PA23_CROAT/sp|Q8QG87|PA2A_BOTIN/sp|P0CG56|PA2BB_CRODU/sp|P0CAS4|PA2BD_CRODR/sp|P17935|PA2HL_VIPAA/sp|P0DUN4|PA2A2_BOTBZ/sp|P0DUN3|PA2A1_BOTBZ/sp|P0CAS2|PA2B6_CRODO/sp|P0CAS5|PA2BE_CRODU/sp|P0CAS…	63,K,V/99,K,A/85,K,V/83,Q,V/83,E,V/83,K,A/83,K,A/99,E,V/99,K,A/54,R,-/99,K,V/83,E,V/83,Q,V/99,K,A/68,X,V/74,K,V/83,E,V/83,E,V/83,E,V/59,E,V/70,K,V/82,E,V/99,K,A/99,K,A/83,E,I/99,K,V/83,K,V/83,K,A/99,K,V/99,E,V/83,E,A/99,K,A/83,K,V/85,K,V/99,K,V/82,E,V/83,K,V/99,E,V/99,K,A/83,K,V/99,K,V/82,E,V/99,E,V/83,E,V/83,E,V/83,E,V/	0	RecName: Full=Acidic phospholipase A2 Ts-A4; Short=svPLA2; AltName: Full=Phosphatidylcholine 2-acylhydrolase; Flags: Precursor [Trimeresurus stejnegeri]	Trimeresurus stejnegeri	28.6	28.6	1	0.11	1	139	Q6H3C7.1
			VSeo_27c.55.55.2 File:"VSeo_27c.raw", NativeID:"controllerType=0 controllerNumber=1 scan=55"	PLA2	LSDCSPK	4,Carbamidomethyl[C];	806.37	2	0	806.371	-0.001325	4.52651	0.0133591	sp|F8QN50|PA2HS_VIPRE/	69,K,T/	0	ammodytin L(2) isoform [Vipera berus berus]	Vipera berus berus	25.2	25.2	1	1.7	1	138	CAE47248.1
			VSeo_27c.70.70.3 File:"VSeo_27c.raw", NativeID:"controllerType=0 controllerNumber=1 scan=70"	VEGF	FTEHTACECRPR	7,Carbamidomethyl[C];9,Carbamidomethyl[C];	1563.67	3	0	1563.68	-0.007071	7.09496	0.0139299	sp|P83942|TXVE_VIPAP/sp|P67863|TXVE_VIPAA/sp|P82475|TXVE2_MACLB/	84,K,R/108,K,R/84,K,R/	1	vammin-1' [Vipera ammodytes ammodytes]	Vipera ammodytes ammodytes	44.8	44.8	1	5e-07	1	145	APB93447.1
			VSeo_27c.32.32.2 File:"VSeo_27c.raw", NativeID:"controllerType=0 controllerNumber=1 scan=32"	PLA2	TYNKK		653.36	2	0	653.362	-0.001333	2.78278	0.0524361	sp|P04361|PA2HB_AGKPI/sp|Q2YHJ4|PA2HB_TRIBO/sp|Q2YHJ8|PA2HB_TRIPE/sp|Q8UVZ7|PA2H_CROAT/sp|P0DUN7|PA2H_LACMU/sp|Q8UVU7|PA2HB_CERGO/sp|F8QN50|PA2HS_VIPRE/sp|A0A1S5XW05|PA2HP_BOTMO/sp|P24294|PA2A2_ERIMA/sp|P86803|PA2B1_BOTMA/sp|P86804|PA2B2_BOTMA/sp|P49121|PA2H1_AGKCL/sp|P82287|PA2H2_BOTPI/sp|P48650|PA2HS_ECHCA/sp|P17935|PA2HL_VIPAA/sp|C7G1G6|PA2B3_PROFL/sp|P31854|PA2B_VIPBB/sp|Q6JK69|PA2H1_BOTAT/sp…	101,D,Y/117,G,E/117,D,E/117,D,Y/101,D,Y/117,N,Y/117,K,Y/117,D,Y/101,N,Y/101,G,Y/101,G,Y/117,D,Y/101,G,Y/101,N,Y/117,K,Y/118,G,Y/117,N,Y/117,D,Y/117,D,Y/117,D,Y/101,G,Y/92,G,Y/117,Q,Y/100,N,Y/101,G,Y/118,G,Y/101,G,Y/101,R,Y/118,G,Y/101,G,R/117,N,Y/101,D,Y/101,N,Y/100,G,Y/101,N,Y/101,D,Y/117,D,Y/117,D,Q/117,K,Y/102,G,Y/101,D,Y/101,N,Y/117,G,Y/117,R,E/100,K,Y/101,N,Y/	1	ammodytin L(2) isoform [Vipera berus berus]	Vipera berus berus	19.7	19.7	1	96	1	138	CAE47248.1
			VSeo_27c.76.76.2 File:"VSeo_27c.raw", NativeID:"controllerType=0 controllerNumber=1 scan=76"	PLA2	MIQEETEK		1007.47	2	0	1007.47	-0.004253	3.53453	0.0575375	sp|F8QN50|PA2HS_VIPRE/sp|P0DKL7|PA2HA_VIPRE/	23,K,N/7,L,N/	0	ammodytin L(2) isoform [Vipera berus berus]	Vipera berus berus	30.8	30.8	1	0.023	1	138	CAE47248.1
			VSeo_27c.205.205.2 File:"VSeo_27c.raw", NativeID:"controllerType=0 controllerNumber=1 scan=205"	PLA2	LGNKGKPK	3,Deamidated[N];	842.505	2	0	842.509	-0.004516	2.66561	0.192815	sp|P17935|PA2HL_VIPAA/	45,G,D/	2	RecName: Full=Basic phospholipase A2 homolog ammodytin L; Short=AMDL; Short=AtnL; Short=svPLA2 homolog; Flags: Precursor [Vipera ammodytes ammodytes]	Vipera ammodytes ammodytes	26.9	26.9	1	0.53	1	138	P17935.1
			VSeo_27c.49.49.2 File:"VSeo_27c.raw", NativeID:"controllerType=0 controllerNumber=1 scan=49"	VEGF	CTPVGK	1,Carbamidomethyl[C];	661.333	2	0	661.334	-0.001055	1.93059	0.210983	sp|P67861|TXVE_DABRR/sp|P83942|TXVE_VIPAP/sp|P0DL42|TXVE_DABSI/sp|P67863|TXVE_VIPAA/sp|P82475|TXVE2_MACLB/	79,K,H/55,K,H/55,K,H/79,K,H/55,K,H/	0	vammin-1' [Vipera ammodytes ammodytes]	Vipera ammodytes ammodytes	22.3	22.3	1	14	1	145	APB93447.1
			VSeo_27c.413.413.2 File:"VSeo_27c.raw", NativeID:"controllerType=0 controllerNumber=1 scan=413"	VEGF	KHTADIQIMRMNPRTHSSK	9,Oxidation[M];	2267.15	2	0	2267.15	0.001228	0.989073	0.272476	sp|P67861|TXVE_DABRR/sp|P0DL42|TXVE_DABSI/	84,G,M/60,G,M/	3	Crystal structure of VR-1, a VEGF-F from a snake venom [Daboia russelii russelii]	Daboia russelii russelii	66.8	66.8	1	3e-14	1	96	1WQ9_B
			VSeo_27c.175.175.3 File:"VSeo_27c.raw", NativeID:"controllerType=0 controllerNumber=1 scan=175"	PLA2	SFYGCYCGVGGK	7,unknown[132.058 Da][C];	1372.57	3	0	1372.57	0.002296	3.17141	0.302939	sp|P14424|PA2BB_VIPAA/sp|F8QN54|PA2B_VIPRE/sp|P00626|PA2BA_VIPAA/sp|P11407|PA2BC_VIPAA/	37,Y,G/37,Y,G/37,Y,G/37,Y,G/	0	ammodytoxin C variant [Vipera aspis aspis]	Vipera aspis aspis	42.6	42.6	1	3e-06	1	138	CAE47282.1
			VSeo_27c.50.50.2 File:"VSeo_27c.raw", NativeID:"controllerType=0 controllerNumber=1 scan=50"	PLA2	KQICECDR	4,Carbamidomethyl[C];6,Carbamidomethyl[C];	1108.48	2	0	1108.49	-0.007803	0.972	0.342693	sp|P0DUN0|PA23_BOTHY/sp|Q6H3C7|PA2AD_TRIST/sp|P81243|PA2A_BOTJA/sp|C0HKC4|PA2B1_AGKPC/sp|P51972|PA2B1_AGKPI/sp|F8QN50|PA2HS_VIPRE/sp|Q8QG87|PA2A_BOTIN/sp|P17935|PA2HL_VIPAA/sp|P0DUN3|PA2A1_BOTBZ/sp|P84397|PA2A2_BOTIN/sp|Q71QE8|PA2BN_CROVV/sp|Q805A2|PA2BN_PROFL/sp|Q6EER4|PA2B_BOTSC/sp|Q6EER5|PA2B_CERGO/sp|Q6EER6|PA2B_SISMS/sp|Q2HZ28|PA2A_BOTER/sp|Q9PVF2|PA2AE_CALRH/sp|P86907|PA2A_BOTAM/sp|P86389|P…	62,K,V/98,K,A/84,K,V/82,K,A/82,K,A/98,K,A/98,K,V/98,K,A/73,K,V/69,Q,V/98,E,A/98,E,A/98,E,V/82,E,V/82,E,A/98,K,V/98,K,A/82,K,V/84,K,V/98,K,V/82,K,V/98,K,A/82,K,V/98,K,V/	1	RecName: Full=Acidic phospholipase A2 Ts-A4; Short=svPLA2; AltName: Full=Phosphatidylcholine 2-acylhydrolase; Flags: Precursor [Trimeresurus stejnegeri]	Trimeresurus stejnegeri	31.6	31.6	1	0.012	1	139	Q6H3C7.1
			VSeo_27c.151.151.2 File:"VSeo_27c.raw", NativeID:"controllerType=0 controllerNumber=1 scan=151"	PLA2	AFYGCYCGKGGRGK	5,Carbamidomethyl[C];7,Carbamidomethyl[C];	1580.7	2	0.017842	1580.71	-0.014009	0.008516	0.552399	sp|P59264|PA2BA_PROFL/sp|P0DQP6|PA21_CERGO/sp|C0HLF0|PA2_POROP/sp|Q02517|PA2BW_PROFL/sp|Q8JIG0|PA2BQ_PROFL/sp|P06860|PA2BX_PROFL/sp|Q90Y77|PA2BY_PROFL/sp|P59265|PA2BB_PROFL/	21,Y,P/21,Y,P/21,Y,P/37,Y,P/37,Y,P/21,Y,P/37,Y,P/21,Y,P/	2	RecName: Full=Basic phospholipase A2; Short=svPLA2; AltName: Full=Myotoxin I; AltName: Full=Phosphatidylcholine 2-acylhydrolase [Cerrophidion godmani]	Cerrophidion godmani	48.6	48.6	1	2e-08	1	39	P0DQP6.1
			VSeo_27d.88.88.2 File:"VSeo_27d.raw", NativeID:"controllerType=0 controllerNumber=1 scan=88"	VEGF	CSGCCTDESLK	1,Carbamidomethyl[C];4,Carbamidomethyl[C];5,Carbamidomethyl[C];	1316.48	2	0	1316.49	-0.008783	15.2367	5.36183e-06	sp|P83942|TXVE_VIPAP/sp|P67863|TXVE_VIPAA/sp|P82475|TXVE2_MACLB/	44,R,C/68,R,C/44,R,C/	0	vammin-1' [Vipera ammodytes ammodytes]	Vipera ammodytes ammodytes	39.2	39.2	1	4e-05	1	145	APB93447.1
			VSeo_27d.238.238.3 File:"VSeo_27d.raw", NativeID:"controllerType=0 controllerNumber=1 scan=238"	VEGF	VRPFLEVHER	0,unknown[196.085 Da][111][ProteinN-term];	1392.73	3	0	1392.74	-0.007634	15.0241	3.36622e-05	sp|P83942|TXVE_VIPAP/sp|P67863|TXVE_VIPAA/	1,Q,S/25,Q,S/	1	vammin-1' [Vipera ammodytes ammodytes]	Vipera ammodytes ammodytes	36.7	36.7	1	0.0003	1	145	APB93447.1
			VSeo_27d.196.196.3 File:"VSeo_27d.raw", NativeID:"controllerType=0 controllerNumber=1 scan=196"	VEGF	PFLEVHER		1026.53	3	0	1026.54	-0.004215	9.44115	4.98805e-05	sp|P83942|TXVE_VIPAP/sp|P67863|TXVE_VIPAA/	3,R,S/27,R,S/	0	vammin-1' [Vipera ammodytes ammodytes]	Vipera ammodytes ammodytes	30.3	30.3	1	0.031	1	145	APB93447.1
			VSeo_27d.199.199.2 File:"VSeo_27d.raw", NativeID:"controllerType=0 controllerNumber=1 scan=199"	PLA2	AAAICFR	5,Carbamidomethyl[C];	808.41	2	0	808.413	-0.003364	9.24342	0.000192337	sp|P81478|PA2A2_TRIGA/sp|P14418|PA2A_GLOHA/sp|P0DKU1|PA2H_GLOUS/sp|O42190|PA2A6_GLOHA/sp|O42189|PA2A5_GLOHA/sp|C0HKC4|PA2B1_AGKPC/sp|P51972|PA2B1_AGKPI/sp|Q91506|PA2A1_PROMU/sp|P00625|PA2A1_OVOOK/sp|P18998|PA2HA_CROSS/sp|F8QN50|PA2HS_VIPRE/sp|C0HLF0|PA2_POROP/sp|Q6H3C8|PA2AF_TRIST/sp|P17935|PA2HL_VIPAA/sp|O42188|PA2H_GLOHA/sp|Q2YHJ3|PA2A_TRIBO/sp|P14424|PA2BB_VIPAA/sp|C0HK16|PA2BD_DABRR/sp|Q02517…	90,K,D/90,R,D/90,R,D/90,R,D/90,R,D/90,R,D/90,R,D/89,R,D/106,L,D/106,K,D/106,R,E/89,K,D/106,K,D/106,R,E/90,K,D/106,R,D/106,R,K/90,K,Q/106,K,D/105,R,D/106,K,D/106,K,Q/106,K,D/90,R,D/106,K,E/106,K,E/106,R,K/106,K,D/90,K,R/90,K,D/90,K,D/90,R,E/90,R,D/106,R,D/106,K,D/105,R,D/106,R,K/106,R,K/106,R,D/106,K,D/106,K,D/106,K,N/106,K,D/106,R,D/106,K,D/106,K,D/106,K,D/90,K,D/90,R,D/106,K,D/90,K,Q/106,K,D/90,…	0	PLA2(IIA)-Aze2 [Azemiops feae]	Azemiops feae	25.7	25.7	1	1.1	1	151	ABU68548.1
			VSeo_27d.184.184.2 File:"VSeo_27d.raw", NativeID:"controllerType=0 controllerNumber=1 scan=184"	VEGF	HTVDLQIMR	8,Oxidation[M];	1128.58	2	0	1128.58	-0.005633	7.93591	0.000298122	sp|P83942|TXVE_VIPAP/sp|P67863|TXVE_VIPAA/	61,K,V/85,K,V/	0	vammin-1' [Vipera ammodytes ammodytes]	Vipera ammodytes ammodytes	34.1	34.1	1	0.002	1	145	APB93447.1
			VSeo_27d.211.211.3 File:"VSeo_27d.raw", NativeID:"controllerType=0 controllerNumber=1 scan=211"	VEGF	RPFLEVHER	1,Arg->Gly[R];	1083.56	3	0	1083.56	-0.003056	7.38707	0.000653901	sp|P83942|TXVE_VIPAP/sp|P67863|TXVE_VIPAA/	2,V,S/26,V,S/	1	vammin-1' [Vipera ammodytes ammodytes]	Vipera ammodytes ammodytes	33.7	33.7	1	0.003	1	145	APB93447.1
			VSeo_27d.67.67.3 File:"VSeo_27d.raw", NativeID:"controllerType=0 controllerNumber=1 scan=67"	VEGF	FTEHTACECRPR	7,Carbamidomethyl[C];9,Carbamidomethyl[C];	1563.67	3	0	1563.68	-0.005606	8.23023	0.00119925	sp|P83942|TXVE_VIPAP/sp|P67863|TXVE_VIPAA/sp|P82475|TXVE2_MACLB/	84,K,R/108,K,R/84,K,R/	1	vammin-1' [Vipera ammodytes ammodytes]	Vipera ammodytes ammodytes	44.8	44.8	1	5e-07	1	145	APB93447.1
			VSeo_27d.191.191.2 File:"VSeo_27d.raw", NativeID:"controllerType=0 controllerNumber=1 scan=191"	VEGF	PSCVAVLR	3,Carbamidomethyl[C];	901.488	2	0	901.492	-0.003906	5.2756	0.00307948	sp|C0K3N1|TXVE_BITAR/sp|P67861|TXVE_DABRR/sp|P83942|TXVE_VIPAP/sp|P0DL42|TXVE_DABSI/sp|P67863|TXVE_VIPAA/sp|P82475|TXVE2_MACLB/	60,R,C/60,R,C/36,R,C/36,R,C/60,R,C/36,R,C/	0	RecName: Full=Snake venom vascular endothelial growth factor toxin barietin; Short=svVEGF; AltName: Full=VEGF-F; Flags: Precursor [Bitis arietans]	Bitis arietans	28.2	28.2	1	0.18	1	150	C0K3N1.1
			VSeo_27d.166.166.3 File:"VSeo_27d.raw", NativeID:"controllerType=0 controllerNumber=1 scan=166"	PLA2	CCFVHSCCYAK	1,Carbamidomethyl[C];2,Carbamidomethyl[C];7,Carbamidomethyl[C];8,Carbamidomethyl[C];	1491.56	3	0	1491.56	-0.007033	3.85963	0.00459084	sp|F8QN50|PA2HS_VIPRE/sp|P17935|PA2HL_VIPAA/	58,R,L/58,R,L/	0	ammodytin L(2) isoform [Vipera berus berus]	Vipera berus berus	43.1	43.1	1	2e-06	1	138	CAE47248.1
			VSeo_27d.50.50.2 File:"VSeo_27d.raw", NativeID:"controllerType=0 controllerNumber=1 scan=50"	VEGF	QGEPDGPK		827.385	2	0	827.389	-0.004401	3.34377	0.0678471	sp|P83942|TXVE_VIPAP/sp|P67863|TXVE_VIPAA/sp|P82475|TXVE2_MACLB/	98,K,E/122,K,E/98,K,E/	0	vammin-1' [Vipera ammodytes ammodytes]	Vipera ammodytes ammodytes	28.2	28.2	1	0.18	1	145	APB93447.1
			VSeo_27d.55.55.2 File:"VSeo_27d.raw", NativeID:"controllerType=0 controllerNumber=1 scan=55"	PLA2	LSDCSPK	4,Carbamidomethyl[C];	806.37	2	0	806.371	-0.001142	1.9689	0.0800454	sp|F8QN50|PA2HS_VIPRE/	69,K,T/	0	ammodytin L(2) isoform [Vipera berus berus]	Vipera berus berus	25.2	25.2	1	1.7	1	138	CAE47248.1
			VSeo_27d.301.301.3 File:"VSeo_27d.raw", NativeID:"controllerType=0 controllerNumber=1 scan=301"	VEGF	EISDIFRPSCVAVLR	10,Carbamidomethyl[C];	1761.92	3	0	1761.93	-0.007977	1.94244	0.0919178	sp|P67861|TXVE_DABRR/sp|P83942|TXVE_VIPAP/sp|P0DL42|TXVE_DABSI/sp|P67863|TXVE_VIPAA/sp|P82475|TXVE2_MACLB/	53,D,C/29,D,C/29,D,C/53,D,C/29,D,C/	1	vammin-1' [Vipera ammodytes ammodytes]	Vipera ammodytes ammodytes	51.5	51.5	1	4e-09	1	145	APB93447.1
			VSeo_27d.58.58.3 File:"VSeo_27d.raw", NativeID:"controllerType=0 controllerNumber=1 scan=58"	VEGF	LEVHER		782.419	3	0	782.415	0.00358	3.5057	0.150125	sp|P83942|TXVE_VIPAP/sp|P67863|TXVE_VIPAA/	5,F,S/29,F,S/	0	vammin-1' [Vipera ammodytes ammodytes]	Vipera ammodytes ammodytes	23.1	23.1	1	7.2	1	145	APB93447.1
			VSeo_27d.49.49.2 File:"VSeo_27d.raw", NativeID:"controllerType=0 controllerNumber=1 scan=49"	VEGF	CTPVGK	1,Carbamidomethyl[C];	661.332	2	0	661.334	-0.001787	3.31593	0.155105	sp|P67861|TXVE_DABRR/sp|P83942|TXVE_VIPAP/sp|P0DL42|TXVE_DABSI/sp|P67863|TXVE_VIPAA/sp|P82475|TXVE2_MACLB/	79,K,H/55,K,H/55,K,H/79,K,H/55,K,H/	0	vammin-1' [Vipera ammodytes ammodytes]	Vipera ammodytes ammodytes	22.3	22.3	1	14	1	145	APB93447.1
			VSeo_27d.217.217.2 File:"VSeo_27d.raw", NativeID:"controllerType=0 controllerNumber=1 scan=217"	PLA2	GSVIEFGK		836.449	2	0	836.451	-0.00194	1.91206	0.159951	sp|P17935|PA2HL_VIPAA/	15,E,M/	0	ammodytin L(2) isoform [Vipera berus berus]	Vipera berus berus	27.4	27.4	1	0.38	1	138	CAE47248.1
			VSeo_27d.61.61.2 File:"VSeo_27d.raw", NativeID:"controllerType=0 controllerNumber=1 scan=61"	PLA2	QICECDR	3,Carbamidomethyl[C];5,Carbamidomethyl[C];	980.391	2	0	980.392	-0.001653	1.99112	0.219838	sp|P0DUN0|PA23_BOTHY/sp|Q6H3C7|PA2AD_TRIST/sp|P81243|PA2A_BOTJA/sp|P0CAS3|PA2BC_CRODR/sp|P14421|PA2N_GLOHA/sp|C0HKC4|PA2B1_AGKPC/sp|P51972|PA2B1_AGKPI/sp|P24027|PA2BA_CRODU/sp|F8QN50|PA2HS_VIPRE/sp|P0CV89|PA23_CROAT/sp|Q8QG87|PA2A_BOTIN/sp|P0CG56|PA2BB_CRODU/sp|P0CAS4|PA2BD_CRODR/sp|P17935|PA2HL_VIPAA/sp|P0DUN4|PA2A2_BOTBZ/sp|P0DUN3|PA2A1_BOTBZ/sp|P0CAS2|PA2B6_CRODO/sp|P0CAS5|PA2BE_CRODU/sp|P0CAS…	63,K,V/99,K,A/85,K,V/83,Q,V/83,E,V/83,K,A/83,K,A/99,E,V/99,K,A/54,R,-/99,K,V/83,E,V/83,Q,V/99,K,A/68,X,V/74,K,V/83,E,V/83,E,V/83,E,V/59,E,V/70,K,V/82,E,V/99,K,A/99,K,A/83,E,I/99,K,V/83,K,V/83,K,A/99,K,V/99,E,V/83,E,A/99,K,A/83,K,V/85,K,V/99,K,V/82,E,V/83,K,V/99,E,V/99,K,A/83,K,V/99,K,V/82,E,V/99,E,V/83,E,V/83,E,V/83,E,V/	0	RecName: Full=Acidic phospholipase A2 Ts-A4; Short=svPLA2; AltName: Full=Phosphatidylcholine 2-acylhydrolase; Flags: Precursor [Trimeresurus stejnegeri]	Trimeresurus stejnegeri	28.6	28.6	1	0.11	1	139	Q6H3C7.1
			VSeo_27d.339.339.2 File:"VSeo_27d.raw", NativeID:"controllerType=0 controllerNumber=1 scan=339"	VEGF	ISDIFRPSCVAVLR	0,unknown[196.085 Da][111][ProteinN-term];9,Carbamidomethyl[C];	1743.91	2	0	1743.92	-0.008574	1.01257	0.354447	sp|P67861|TXVE_DABRR/sp|P83942|TXVE_VIPAP/sp|P0DL42|TXVE_DABSI/sp|P67863|TXVE_VIPAA/sp|P82475|TXVE2_MACLB/	54,E,C/30,E,C/30,E,C/54,E,C/30,E,C/	1	vammin-1' [Vipera ammodytes ammodytes]	Vipera ammodytes ammodytes	48.1	48.1	1	5e-08	1	145	APB93447.1
			VSeo_27d.400.400.3 File:"VSeo_27d.raw", NativeID:"controllerType=0 controllerNumber=1 scan=400"	PLA2	LIGVEGSLLEFGMMILGETGK	0,Acetyl[ProteinN-term];13,Oxidation[M];14,Oxidation[M];	2268.14	3	0	2268.15	-0.008567	0.975183	0.502049	sp|P14424|PA2BB_VIPAA/sp|P00626|PA2BA_VIPAA/sp|P11407|PA2BC_VIPAA/	10,C,N/10,C,N/10,C,N/	0	ammodytoxin B variant [Vipera aspis aspis]	Vipera aspis aspis	69.4	69.4	1	6e-15	1
			VSeo_27d.280.280.3 File:"VSeo_27d.raw", NativeID:"controllerType=0 controllerNumber=1 scan=280"	VEGF	QAAPAQGDGERQQGEVIPFLK		2239.12	3	0.026227	2239.15	-0.021675	0.964666	0.646842	sp|P83906|VEGFA_BITGA/	24,L,V/	1	RecName: Full=Vascular endothelial growth factor A; Short=VEGF-A; AltName: Full=Vascular permeability factor; Short=VPF; Flags: Precursor [Bitis gabonica]	Bitis gabonica	47.4	47.4	1	5e-08	1	191	P83906.1
			VSeo_27d.422.422.3 File:"VSeo_27d.raw", NativeID:"controllerType=0 controllerNumber=1 scan=422"	VEGF	ESLKCTPVGKHTVDLQIMR	0,unknown[196.085 Da][111][ProteinN-term];	2266.15	3	0.30654	2266.17	-0.015506	0.958342	0.905985	sp|P83942|TXVE_VIPAP/sp|P67863|TXVE_VIPAA/	51,D,V/75,D,V/	2	vammin-1' [Vipera ammodytes ammodytes]	Vipera ammodytes ammodytes	65.1	65.1	1	1e-13	1	145	APB93447.1
			VSeo_27d.202.202.2 File:"VSeo_27d.raw", NativeID:"controllerType=0 controllerNumber=1 scan=202"	PLA2	LGNKGKPK	3,Deamidated[N];	842.505	2	0.32521	842.509	-0.003906	2.60467	0.950801	sp|P17935|PA2HL_VIPAA/	45,G,D/	2	RecName: Full=Basic phospholipase A2 homolog ammodytin L; Short=AMDL; Short=AtnL; Short=svPLA2 homolog; Flags: Precursor [Vipera ammodytes ammodytes]	Vipera ammodytes ammodytes	26.9	26.9	1	0.53	1	138	P17935.1
			VSeo_27d.405.405.2 File:"VSeo_27d.raw", NativeID:"controllerType=0 controllerNumber=1 scan=405"	VEGF	KHTADIQIMRMNPRTHSSK	9,Oxidation[M];	2267.14	2	0.59447	2267.15	-0.011712	0.002	0.999879	sp|P67861|TXVE_DABRR/sp|P0DL42|TXVE_DABSI/	84,G,M/60,G,M/	3	Crystal structure of VR-1, a VEGF-F from a snake venom [Daboia russelii russelii]	Daboia russelii russelii	66.8	66.8	1	3e-14	1	96	1WQ9_B
			VSeo_27d.409.409.3 File:"VSeo_27d.raw", NativeID:"controllerType=0 controllerNumber=1 scan=409"	VEGF	LRCSGCCTDESLKCTPVGKHTVDMQIMR	3,unknown[11.070 Da][C];7,unknown[11.070 Da][C];27,Oxidation[M];	3149.62	3	0.59447	3149.57	0.053553	1.00216	0.999991	sp|P82475|TXVE2_MACLB/	42,V,V/	3	RecName: Full=Snake venom vascular endothelial growth factor toxin ICPP; Short=svVEGF; AltName: Full=Increasing capillary permeability protein; AltName: Full=Increasing capillary-2; Short=IC2; AltName: Full=VEGF-F [Macrovipera lebetina]	Macrovipera lebetina	62	62	1	5e-14	1	110	P82475.2
			VSeo_27e.69.69.3 File:"VSeo_27e.raw", NativeID:"controllerType=0 controllerNumber=1 scan=69"	VEGF	FTEHTACECRPRR	12,Arg->Asn[R];	1563.68	3	0.13812	1563.68	-0.002849	5.42046	0.00317575	sp|P83942|TXVE_VIPAP/sp|P67863|TXVE_VIPAA/sp|P82475|TXVE2_MACLB/	84,K,K/108,K,K/84,K,K/	2	vammin-1' [Vipera ammodytes ammodytes]	Vipera ammodytes ammodytes	48.1	48.1	1	4e-08	1	145	APB93447.1
			VSeo_27e.87.87.2 File:"VSeo_27e.raw", NativeID:"controllerType=0 controllerNumber=1 scan=87"	VEGF	CSGCCTDESLK	1,Carbamidomethyl[C];4,Carbamidomethyl[C];5,Carbamidomethyl[C];	1316.48	2	0.13857	1316.49	-0.008783	12.0162	0.0854962	sp|P83942|TXVE_VIPAP/sp|P67863|TXVE_VIPAA/sp|P82475|TXVE2_MACLB/	44,R,C/68,R,C/44,R,C/	0	vammin-1' [Vipera ammodytes ammodytes]	Vipera ammodytes ammodytes	39.2	39.2	1	4e-05	1	145	APB93447.1
			VSeo_27e.195.195.3 File:"VSeo_27e.raw", NativeID:"controllerType=0 controllerNumber=1 scan=195"	VEGF	PFLEVHER		1026.53	3	0.13857	1026.54	-0.00394	11.1644	0.106578	sp|P83942|TXVE_VIPAP/sp|P67863|TXVE_VIPAA/	3,R,S/27,R,S/	0	vammin-1' [Vipera ammodytes ammodytes]	Vipera ammodytes ammodytes	30.3	30.3	1	0.031	1	145	APB93447.1
			VSeo_27e.186.186.2 File:"VSeo_27e.raw", NativeID:"controllerType=0 controllerNumber=1 scan=186"	VEGF	PSCVAVLR	3,Carbamidomethyl[C];	901.486	2	0.13857	901.492	-0.006164	10.359	0.121515	sp|C0K3N1|TXVE_BITAR/sp|P67861|TXVE_DABRR/sp|P83942|TXVE_VIPAP/sp|P0DL42|TXVE_DABSI/sp|P67863|TXVE_VIPAA/sp|P82475|TXVE2_MACLB/	60,R,C/60,R,C/36,R,C/36,R,C/60,R,C/36,R,C/	0	RecName: Full=Snake venom vascular endothelial growth factor toxin barietin; Short=svVEGF; AltName: Full=VEGF-F; Flags: Precursor [Bitis arietans]	Bitis arietans	28.2	28.2	1	0.18	1	150	C0K3N1.1
			VSeo_27e.243.243.3 File:"VSeo_27e.raw", NativeID:"controllerType=0 controllerNumber=1 scan=243"	VEGF	QVRPFLEVHER	0,Gln->pyro-Glu[AnyN-termQ];	1392.73	3	0.13857	1392.74	-0.008087	10.66	0.127895	sp|P83942|TXVE_VIPAP/sp|P67863|TXVE_VIPAA/	0,-,S/24,G,S/	1	vammin-1' [Vipera ammodytes ammodytes]	Vipera ammodytes ammodytes	40.1	40.1	1	2e-05	1	145	APB93447.1
			VSeo_27e.261.261.2 File:"VSeo_27e.raw", NativeID:"controllerType=0 controllerNumber=1 scan=261"	VEGF	RCSGCCTDESMKCTPVGK	0,Acetyl[ProteinN-term];2,Carbamidomethyl[C];5,Carbamidomethyl[C];6,unknown[11.070 Da][C];11,Oxidation[M];13,Carbamidomethyl[C];	2144.89	2	0.13857	2144.92	-0.028638	0.002134	0.128572	sp|P67861|TXVE_DABRR/sp|P0DL42|TXVE_DABSI/	67,L,H/43,L,H/	2	RecName: Full=Snake venom vascular endothelial growth factor toxin VR-1; Short=svVEGF; AltName: Full=VEGF-F; Flags: Precursor [Daboia russelii]	Daboia russelii	63.4	63.4	1	5e-13	1	144	P67861.2
			VSeo_27e.66.66.3 File:"VSeo_27e.raw", NativeID:"controllerType=0 controllerNumber=1 scan=66"	VEGF	FTEHTACECRPR	7,Carbamidomethyl[C];9,Carbamidomethyl[C];	1563.67	3	0.13857	1563.68	-0.005789	5.58191	0.144275	sp|P83942|TXVE_VIPAP/sp|P67863|TXVE_VIPAA/sp|P82475|TXVE2_MACLB/	84,K,R/108,K,R/84,K,R/	1	vammin-1' [Vipera ammodytes ammodytes]	Vipera ammodytes ammodytes	44.8	44.8	1	5e-07	1	145	APB93447.1
			VSeo_27e.181.181.2 File:"VSeo_27e.raw", NativeID:"controllerType=0 controllerNumber=1 scan=181"	VEGF	HTVDLQIMR	8,Oxidation[M];	1128.58	2	0.13857	1128.58	-0.005755	9.85556	0.152659	sp|P83942|TXVE_VIPAP/sp|P67863|TXVE_VIPAA/	61,K,V/85,K,V/	0	vammin-1' [Vipera ammodytes ammodytes]	Vipera ammodytes ammodytes	34.1	34.1	1	0.002	1	145	APB93447.1
			VSeo_27e.57.57.3 File:"VSeo_27e.raw", NativeID:"controllerType=0 controllerNumber=1 scan=57"	VEGF	CVAVLRCSGCCTDESMKCTPVGK		2390.01	3	0.18188	2390.05	-0.03155	0.010934	0.212244	sp|P67861|TXVE_DABRR/sp|P0DL42|TXVE_DABSI/	62,S,H/38,S,H/	2	Crystal structure of VR-1, a VEGF-F from a snake venom [Daboia russelii russelii]	Daboia russelii russelii	79.1	79.1	1	3e-18	1	96	1WQ9_B
			VSeo_27e.47.47.2 File:"VSeo_27e.raw", NativeID:"controllerType=0 controllerNumber=1 scan=47"	VEGF	CTPVGK	1,Carbamidomethyl[C];	661.333	2	0.18188	661.334	-0.000383	1.95171	0.217004	sp|P67861|TXVE_DABRR/sp|P83942|TXVE_VIPAP/sp|P0DL42|TXVE_DABSI/sp|P67863|TXVE_VIPAA/sp|P82475|TXVE2_MACLB/	79,K,H/55,K,H/55,K,H/79,K,H/55,K,H/	0	vammin-1' [Vipera ammodytes ammodytes]	Vipera ammodytes ammodytes	22.3	22.3	1	14	1	145	APB93447.1
			VSeo_28a29a.227.227.2 File:"VSeo_28a29a.raw", NativeID:"controllerType=0 controllerNumber=1 scan=227"	svMP	NPCQIYYIPSDENKG	3,Carbamidomethyl[C];13,Asn->Gly[N];	1740.78	2	0	1740.79	-0.010707	9.99971	0.000177532	sp|Q4VM07|VM3VB_MACLB/	573,K,M/	1	RecName: Full=Zinc metalloproteinase-disintegrin-like VLAIP-B; AltName: Full=Snake venom metalloproteinase; Short=SVMP; Flags: Precursor [Macrovipera lebetina]	Macrovipera lebetina	36.2	36.2	1	0.0005	1	614	Q4VM07.1
			VSeo_28a29a.191.191.2 File:"VSeo_28a29a.raw", NativeID:"controllerType=0 controllerNumber=1 scan=191"	svMP	LYCIDSSPAN	3,Carbamidomethyl[C];7,Ser->Lys[S];	1180.56	2	0	1180.57	-0.00702	9.46315	0.00100625	sp|Q8AWI5|VM3HA_GLOHA/sp|Q2LD49|VM3TM_TRIST/	558,R,K/559,R,K/	0	RecName: Full=Zinc metalloproteinase-disintegrin-like TSV-DM; AltName: Full=Snake venom metalloproteinase; Short=SVMP; Flags: Precursor [Trimeresurus stejnegeri]	Trimeresurus stejnegeri	35.8	35.8	1	0.0005	1	621	Q2LD49.1
			VSeo_28a29a.230.230.2 File:"VSeo_28a29a.raw", NativeID:"controllerType=0 controllerNumber=1 scan=230"	svMP	NPCQIYYIPSDENK	3,Carbamidomethyl[C];	1740.78	2	0	1740.79	-0.010465	7.23139	0.0182886	sp|Q4VM07|VM3VB_MACLB/	573,K,G/	0	RecName: Full=Zinc metalloproteinase-disintegrin-like VLAIP-B; AltName: Full=Snake venom metalloproteinase; Short=SVMP; Flags: Precursor [Macrovipera lebetina]	Macrovipera lebetina	52	52	1	2e-09	1	614	Q4VM07.1
			VSeo_28a29a.134.134.2 File:"VSeo_28a29a.raw", NativeID:"controllerType=0 controllerNumber=1 scan=134"	svMP	IACAPEDVK	3,Carbamidomethyl[C];	1002.49	2	0	1002.49	-0.003841	4.55049	0.0186687	sp|Q4VM07|VM3VB_MACLB/	550,K,C/	0	RecName: Full=Zinc metalloproteinase-disintegrin-like VLAIP-B; AltName: Full=Snake venom metalloproteinase; Short=SVMP; Flags: Precursor [Macrovipera lebetina]	Macrovipera lebetina	32	32	1	0.01	1	614	Q4VM07.1
			VSeo_28a29a.155.155.3 File:"VSeo_28a29a.raw", NativeID:"controllerType=0 controllerNumber=1 scan=155"	svMP	LRPGAQCGDGVCCYQCK	7,Carbamidomethyl[C];12,Carbamidomethyl[C];13,Carbamidomethyl[C];16,Carbamidomethyl[C];	2028.84	3	0	2028.85	-0.011088	5.294	0.0544234	sp|Q4VM07|VM3VB_MACLB/	439,K,F/	1	RecName: Full=Zinc metalloproteinase-disintegrin-like VLAIP-B; AltName: Full=Snake venom metalloproteinase; Short=SVMP; Flags: Precursor [Macrovipera lebetina]	Macrovipera lebetina	40	40	1	2e-05	1	614	Q4VM07.1
			VSeo_28a29a.215.215.3 File:"VSeo_28a29a.raw", NativeID:"controllerType=0 controllerNumber=1 scan=215"	svMP	AGTVCRPANGECDVSDLCTGQSAECPTDQFQR	5,Carbamidomethyl[C];12,Carbamidomethyl[C];18,Carbamidomethyl[C];25,Carbamidomethyl[C];	3586.49	3	0	3586.5	-0.017681	1.94269	0.233914	sp|Q4VM08|VM3VA_MACLB/sp|Q4VM07|VM3VB_MACLB/	460,R,N/459,R,N/	1	RecName: Full=Zinc metalloproteinase-disintegrin-like VLAIP-A; AltName: Full=Snake venom metalloproteinase; Short=SVMP; AltName: Full=Vipera lebetina apoptosis-inducing protein; Flags: Precursor [Macrovipera lebetina]	Macrovipera lebetina	70.5	70.5	1	1e-15	1	616	Q4VM08.1
			VSeo_28a29a.455.455.15 File:"VSeo_28a29a.raw", NativeID:"controllerType=0 controllerNumber=1 scan=455"	svMP	KNPCNIIYSPNDEDKGMVLPGTKCADGMACNSNGQCVDVNR	2,Deamidated[N];24,Carbamidomethyl[C];28,Oxidation[M];30,Carbamidomethyl[C];31,Deamidated[N];	4503.02	15	0	4502.94	0.07435	2.13165	0.270096	sp|Q90ZI3|VM3H1_PROFL/	569,K,T/	3	P-III metalloprotease [Protobothrops flavoviridis]	Protobothrops flavoviridis	84.3	84.3	1	4e-23	1	58	BAN82003.1
			VSeo_28a29a.219.219.3 File:"VSeo_28a29a.raw", NativeID:"controllerType=0 controllerNumber=1 scan=219"	svMP	NPCQIYYIPSDENKGMVDPGTK	3,Carbamidomethyl[C];16,Oxidation[M];	2542.14	3	0	2542.16	-0.013808	1.94981	0.308746	sp|Q4VM07|VM3VB_MACLB/	573,K,C/	1	RecName: Full=Zinc metalloproteinase-disintegrin-like VLAIP-B; AltName: Full=Snake venom metalloproteinase; Short=SVMP; Flags: Precursor [Macrovipera lebetina]	Macrovipera lebetina	50.8	50.8	1	5e-09	1	614
			VSeo_28c.490.490.14 File:"VSeo_28c.raw", NativeID:"controllerType=0 controllerNumber=1 scan=490"	DI	ATRSECDLAGQCTGQSADCPIDRFHRNGQPCLQNYGYCYNGK	6,Carbamidomethyl[C];12,Carbamidomethyl[C];19,Carbamidomethyl[C];20,Pro->Lys[P];30,Pro->Lys[P];31,Carbamidomethyl[C];38,Carbamidomethyl[C];	4987.15	14	0	4987.19	-0.038757	1.02614	0.000342023	sp|C0LZJ5|VM3LC_MACLN/	63,R,C/	3	RecName: Full=Disintegrin-like leberagin-C [Macrovipera lebetina transmediterranea]	Macrovipera lebetina transmediterranea	90.5	90.5	1	6e-24	1	205	C0LZJ5.1
			VSeo_28c.264.264.2 File:"VSeo_28c.raw", NativeID:"controllerType=0 controllerNumber=1 scan=264"	svMP	LFCEILP	3,Carbamidomethyl[C];7,Pro->Lys[P];	922.501	2	0	922.507	-0.005712	8.09175	0.0012991	sp|C0LZJ5|VM3LC_MACLN/	160,R,N/	0	metalloproteinase of class P-III MPIII-1 [Vipera ammodytes ammodytes]	Vipera ammodytes ammodytes	27.4	27.4	1	0.27	1	607	AMB36352.1
			VSeo_28c.223.223.2 File:"VSeo_28c.raw", NativeID:"controllerType=0 controllerNumber=1 scan=223"	DI	CGRLFCEILPNTR	1,Carbamidomethyl[C];6,Carbamidomethyl[C];10,Pro->Lys[P];	1666.84	2	0	1666.85	-0.012726	0.714299	0.0824209	sp|C0LZJ5|VM3LC_MACLN/	157,K,C/	1	RecName: Full=Disintegrin-like leberagin-C [Macrovipera lebetina transmediterranea]	Macrovipera lebetina transmediterranea	31.2	31.2	1	0.031	1	205	C0LZJ5.1
			VSeo_28c.40.40.3 File:"VSeo_28c.raw", NativeID:"controllerType=0 controllerNumber=1 scan=40"	svMP	AGTECRPAR	5,Carbamidomethyl[C];	1017.49	3	0	1017.49	0.000755	3.38413	0.112925	sp|B8K1W0|VM3DK_DABRR/sp|Q2UXR0|VM3E1_ECHOC/sp|Q6X1T6|VM3E6_ECHOC/sp|Q90495|VM3E_ECHCA/	460,R,D/459,R,D/357,K,D/458,K,D/	1	metalloproteinase [Echis coloratus]	Echis coloratus	31.6	31.6	1	0.013	1	629	ADI47635.1
			VSeo_28c.177.177.2 File:"VSeo_28c.raw", NativeID:"controllerType=0 controllerNumber=1 scan=177"	svMP	QNVPECGFCR	9,Carbamidomethyl[C];	1209.53	2	0	1209.51	0.013504	1.44701	0.114259	sp|F8RKW1|VM34_DRYCN/	537,K,I/	0	RecName: Full=Zinc metalloproteinase-disintegrin-like MTP4; AltName: Full=Snake venom metalloproteinase; Short=SVMP; Flags: Precursor [Drysdalia coronoides]	Drysdalia coronoides	38	38	1	9e-05	1	613	F8RKW1.1
			VSeo_28c.240.240.2 File:"VSeo_28c.raw", NativeID:"controllerType=0 controllerNumber=1 scan=240"	svMP	RFPCAAQDVKCGR	3,Pro->Lys[P];4,Carbamidomethyl[C];	1538.74	2	0	1538.77	-0.025802	0.802071	0.210993	sp|Q6X1T6|VM3E6_ECHOC/	450,K,L/	2	group III snake venom metalloproteinase [Echis ocellatus]	Echis ocellatus	31.2	31.2	1	0.026	1	289	ADW54349.1
			VSeo_28c.228.228.3 File:"VSeo_28c.raw", NativeID:"controllerType=0 controllerNumber=1 scan=228"	svMP	QSDRLIPCAPEDVK	0,Gln->pyro-Glu[AnyN-termQ];8,GG[C](Dicarbamidomethyl[C]);	1667.82	3	0.51029	1667.81	0.017238	0.974444	0.999905	sp|C0LZJ5|VM3LC_MACLN/	143,K,C/	1	RecName: Full=Disintegrin-like leberagin-C [Macrovipera lebetina transmediterranea]	Macrovipera lebetina transmediterranea	48.6	48.6	1	4e-08	1	205	C0LZJ5.1
			VSeo_28d29d.260.260.2 File:"VSeo_28d29d.raw", NativeID:"controllerType=0 controllerNumber=1 scan=260"	svMP	LFCEILP	3,Carbamidomethyl[C];7,Pro->Lys[P];	922.502	2	0	922.507	-0.004674	8.40644	0.5	sp|C0LZJ5|VM3LC_MACLN/	160,R,N/	0	metalloproteinase of class P-III MPIII-1 [Vipera ammodytes ammodytes]	Vipera ammodytes ammodytes	27.4	27.4	1	0.27	1	607	AMB36352.1
			VSeo_28e29e.191.191.3 File:"VSeo_28e29e.raw", NativeID:"controllerType=0 controllerNumber=1 scan=191"	VEGF	PFLEVHER		1026.53	3	0	1026.54	-0.003116	10.8988	0.000162481	sp|P83942|TXVE_VIPAP/sp|P67863|TXVE_VIPAA/	3,R,S/27,R,S/	0	vammin-1' [Vipera ammodytes ammodytes]	Vipera ammodytes ammodytes	30.3	30.3	1	0.031	1	145	APB93447.1
			VSeo_28e29e.69.69.3 File:"VSeo_28e29e.raw", NativeID:"controllerType=0 controllerNumber=1 scan=69"	VEGF	FTEHTACECRPR	7,Carbamidomethyl[C];9,Carbamidomethyl[C];	1563.68	3	0	1563.68	-0.003591	6.3549	0.000342845	sp|P83942|TXVE_VIPAP/sp|P67863|TXVE_VIPAA/sp|P82475|TXVE2_MACLB/	84,K,R/108,K,R/84,K,R/	1	vammin-1' [Vipera ammodytes ammodytes]	Vipera ammodytes ammodytes	44.8	44.8	1	5e-07	1	145	APB93447.1
			VSeo_28e29e.195.195.2 File:"VSeo_28e29e.raw", NativeID:"controllerType=0 controllerNumber=1 scan=195"	PLA2	AAAICFR	5,Carbamidomethyl[C];	808.41	2	0	808.413	-0.003059	9.95847	0.000430269	sp|P81478|PA2A2_TRIGA/sp|P14418|PA2A_GLOHA/sp|P0DKU1|PA2H_GLOUS/sp|O42190|PA2A6_GLOHA/sp|O42189|PA2A5_GLOHA/sp|C0HKC4|PA2B1_AGKPC/sp|P51972|PA2B1_AGKPI/sp|Q91506|PA2A1_PROMU/sp|P00625|PA2A1_OVOOK/sp|P18998|PA2HA_CROSS/sp|F8QN50|PA2HS_VIPRE/sp|C0HLF0|PA2_POROP/sp|Q6H3C8|PA2AF_TRIST/sp|P17935|PA2HL_VIPAA/sp|O42188|PA2H_GLOHA/sp|Q2YHJ3|PA2A_TRIBO/sp|P14424|PA2BB_VIPAA/sp|C0HK16|PA2BD_DABRR/sp|Q02517…	90,K,D/90,R,D/90,R,D/90,R,D/90,R,D/90,R,D/90,R,D/89,R,D/106,L,D/106,K,D/106,R,E/89,K,D/106,K,D/106,R,E/90,K,D/106,R,D/106,R,K/90,K,Q/106,K,D/105,R,D/106,K,D/106,K,Q/106,K,D/90,R,D/106,K,E/106,K,E/106,R,K/106,K,D/90,K,R/90,K,D/90,K,D/90,R,E/90,R,D/106,R,D/106,K,D/105,R,D/106,R,K/106,R,K/106,R,D/106,K,D/106,K,D/106,K,N/106,K,D/106,R,D/106,K,D/106,K,D/106,K,D/90,K,D/90,R,D/106,K,D/90,K,Q/106,K,D/90,…	0	PLA2(IIA)-Aze2 [Azemiops feae]	Azemiops feae	25.7	25.7	1	1.1	1	151	ABU68548.1
			VSeo_28e29e.239.239.3 File:"VSeo_28e29e.raw", NativeID:"controllerType=0 controllerNumber=1 scan=239"	VEGF	QVRPFLEVHER	0,Gln->pyro-Glu[AnyN-termQ];	1392.73	3	0	1392.74	-0.009185	12.2837	0.00102366	sp|P83942|TXVE_VIPAP/sp|P67863|TXVE_VIPAA/	0,-,S/24,G,S/	1	vammin-1' [Vipera ammodytes ammodytes]	Vipera ammodytes ammodytes	40.1	40.1	1	2e-05	1	145	APB93447.1
			VSeo_28e29e.236.236.3 File:"VSeo_28e29e.raw", NativeID:"controllerType=0 controllerNumber=1 scan=236"	VEGF	QVRPFLEVHER	5,Phe->Met[F];	1393.73	3	0	1393.74	-0.005486	6.44022	0.00114168	sp|P83942|TXVE_VIPAP/sp|P67863|TXVE_VIPAA/	0,-,S/24,G,S/	1	vammin-1' [Vipera ammodytes ammodytes]	Vipera ammodytes ammodytes	40.1	40.1	1	2e-05	1	145	APB93447.1
			VSeo_28e29e.185.185.2 File:"VSeo_28e29e.raw", NativeID:"controllerType=0 controllerNumber=1 scan=185"	VEGF	PSCVAVLR	3,Carbamidomethyl[C];	901.49	2	0	901.492	-0.002807	4.77622	0.00119815	sp|C0K3N1|TXVE_BITAR/sp|P67861|TXVE_DABRR/sp|P83942|TXVE_VIPAP/sp|P0DL42|TXVE_DABSI/sp|P67863|TXVE_VIPAA/sp|P82475|TXVE2_MACLB/	60,R,C/60,R,C/36,R,C/36,R,C/60,R,C/36,R,C/	0	RecName: Full=Snake venom vascular endothelial growth factor toxin barietin; Short=svVEGF; AltName: Full=VEGF-F; Flags: Precursor [Bitis arietans]	Bitis arietans	28.2	28.2	1	0.18	1	150	C0K3N1.1
			VSeo_28e29e.179.179.2 File:"VSeo_28e29e.raw", NativeID:"controllerType=0 controllerNumber=1 scan=179"	VEGF	HTVDLQIMR	8,Oxidation[M];	1128.58	2	0	1128.58	-0.00429	6.64696	0.00138564	sp|P83942|TXVE_VIPAP/sp|P67863|TXVE_VIPAA/	61,K,V/85,K,V/	0	vammin-1' [Vipera ammodytes ammodytes]	Vipera ammodytes ammodytes	34.1	34.1	1	0.002	1	145	APB93447.1
			VSeo_28e29e.161.161.3 File:"VSeo_28e29e.raw", NativeID:"controllerType=0 controllerNumber=1 scan=161"	PLA2	CCFVHSCCYAK	1,Carbamidomethyl[C];2,Carbamidomethyl[C];7,Carbamidomethyl[C];8,Carbamidomethyl[C];	1491.55	3	0	1491.56	-0.008864	9.43187	0.00321102	sp|F8QN50|PA2HS_VIPRE/sp|P17935|PA2HL_VIPAA/	58,R,L/58,R,L/	0	ammodytin L(2) isoform [Vipera berus berus]	Vipera berus berus	43.1	43.1	1	2e-06	1	138	CAE47248.1
			VSeo_28e29e.248.248.3 File:"VSeo_28e29e.raw", NativeID:"controllerType=0 controllerNumber=1 scan=248"	PLA2	NPLTSYSFYGCHCGLGNK	18,glycidamide[K];	2047.89	3	0	2047.9	-0.008884	6.1298	0.00531618	sp|P17935|PA2HL_VIPAA/	31,K,G/	0	RecName: Full=Basic phospholipase A2 homolog ammodytin L; Short=AMDL; Short=AtnL; Short=svPLA2 homolog; Flags: Precursor [Vipera ammodytes ammodytes]	Vipera ammodytes ammodytes	62.6	62.6	1	9e-13	1	138	P17935.1
			VSeo_28e29e.246.246.3 File:"VSeo_28e29e.raw", NativeID:"controllerType=0 controllerNumber=1 scan=246"	PLA2	NPLTSYSFYGCYCGVGGK	11,unknown[132.058 Da][C];	2047.89	3	0	2047.89	-0.006439	5.22847	0.0076614	sp|P14424|PA2BB_VIPAA/sp|F8QN54|PA2B_VIPRE/sp|P00626|PA2BA_VIPAA/sp|P11407|PA2BC_VIPAA/	31,K,G/31,K,G/31,K,G/31,K,G/	0	ammodytoxin C variant [Vipera aspis aspis]	Vipera aspis aspis	62.1	62.1	1	1e-12	1	138	CAE47282.1
			VSeo_28e29e.218.218.2 File:"VSeo_28e29e.raw", NativeID:"controllerType=0 controllerNumber=1 scan=218"	VEGF	HTVDLQIMR		1112.58	2	0	1112.59	-0.004248	2.86693	0.0312312	sp|P83942|TXVE_VIPAP/sp|P67863|TXVE_VIPAA/	61,K,V/85,K,V/	0	vammin-1' [Vipera ammodytes ammodytes]	Vipera ammodytes ammodytes	34.1	34.1	1	0.002	1	145	APB93447.1
			VSeo_28e29e.54.54.2 File:"VSeo_28e29e.raw", NativeID:"controllerType=0 controllerNumber=1 scan=54"	PLA2	LSDCSPK	4,Carbamidomethyl[C];	806.37	2	0	806.371	-0.001081	1.91755	0.0734557	sp|F8QN50|PA2HS_VIPRE/	69,K,T/	0	ammodytin L(2) isoform [Vipera berus berus]	Vipera berus berus	25.2	25.2	1	1.7	1	138	CAE47248.1
			VSeo_28e29e.76.76.2 File:"VSeo_28e29e.raw", NativeID:"controllerType=0 controllerNumber=1 scan=76"	PLA2	MIQEETEK		1007.47	2	0	1007.47	-0.005474	1.01553	0.202754	sp|F8QN50|PA2HS_VIPRE/sp|P0DKL7|PA2HA_VIPRE/	23,K,N/7,L,N/	0	ammodytin L(2) isoform [Vipera berus berus]	Vipera berus berus	30.8	30.8	1	0.023	1	138	CAE47248.1
			VSeo_28e29e.260.260.4 File:"VSeo_28e29e.raw", NativeID:"controllerType=0 controllerNumber=1 scan=260"	PLA2	PKWDDYTYSWKNGDIVCGGDDPCKK	23,Carbamidomethyl[C];25,glycidamide[K];	3034.33	4	0.29486	3034.33	-0.008386	0.001	0.241369	sp|P04417|PA2B_GLOBL/	58,K,E/	3	RecName: Full=Basic phospholipase A2; Short=PA2-I; Short=svPLA2; AltName: Full=Phosphatidylcholine 2-acylhydrolase [Gloydius blomhoffii]	Gloydius blomhoffii	56.2	56.2	1	1e-11	1	122	P04417.1
			VSeo_28e29e.84.84.2 File:"VSeo_28e29e.raw", NativeID:"controllerType=0 controllerNumber=1 scan=84"	VEGF	CSGCCTDESLK	1,Carbamidomethyl[C];4,Carbamidomethyl[C];5,Carbamidomethyl[C];	1316.48	2	0	1316.49	-0.010126	1.8809	0.242627	sp|P83942|TXVE_VIPAP/sp|P67863|TXVE_VIPAA/sp|P82475|TXVE2_MACLB/	44,R,C/68,R,C/44,R,C/	0	vammin-1' [Vipera ammodytes ammodytes]	Vipera ammodytes ammodytes	39.2	39.2	1	4e-05	1	145	APB93447.1
			VSeo_28e29e.215.215.2 File:"VSeo_28e29e.raw", NativeID:"controllerType=0 controllerNumber=1 scan=215"	PLA2	GSVIEFGK		836.448	2	0	836.451	-0.003038	0.997933	0.309617	sp|P17935|PA2HL_VIPAA/	15,E,M/	0	ammodytin L(2) isoform [Vipera berus berus]	Vipera berus berus	27.4	27.4	1	0.38	1	138	CAE47248.1
			VSeo_28e29e.48.48.2 File:"VSeo_28e29e.raw", NativeID:"controllerType=0 controllerNumber=1 scan=48"	VEGF	CTPVGK	1,Carbamidomethyl[C];	661.334	2	0	661.334	-0.0002	0.96052	0.339251	sp|P67861|TXVE_DABRR/sp|P83942|TXVE_VIPAP/sp|P0DL42|TXVE_DABSI/sp|P67863|TXVE_VIPAA/sp|P82475|TXVE2_MACLB/	79,K,H/55,K,H/55,K,H/79,K,H/55,K,H/	0	vammin-1' [Vipera ammodytes ammodytes]	Vipera ammodytes ammodytes	22.3	22.3	1	14	1	145	APB93447.1
			VSeo_28e29e.293.293.3 File:"VSeo_28e29e.raw", NativeID:"controllerType=0 controllerNumber=1 scan=293"	VEGF	KHTADIQIMRMNPRTHSSK	9,Oxidation[M];	2267.14	3	0	2267.15	-0.008246	0.002	0.349101	sp|P67861|TXVE_DABRR/sp|P0DL42|TXVE_DABSI/	84,G,M/60,G,M/	3	Crystal structure of VR-1, a VEGF-F from a snake venom [Daboia russelii russelii]	Daboia russelii russelii	66.8	66.8	1	3e-14	1	96	1WQ9_B
			VSeo_28e29e.60.60.2 File:"VSeo_28e29e.raw", NativeID:"controllerType=0 controllerNumber=1 scan=60"	PLA2	QICECDR	3,Carbamidomethyl[C];5,Carbamidomethyl[C];	980.385	2	0	980.392	-0.007391	1.79799	0.355545	sp|P0DUN0|PA23_BOTHY/sp|Q6H3C7|PA2AD_TRIST/sp|P81243|PA2A_BOTJA/sp|P0CAS3|PA2BC_CRODR/sp|P14421|PA2N_GLOHA/sp|C0HKC4|PA2B1_AGKPC/sp|P51972|PA2B1_AGKPI/sp|P24027|PA2BA_CRODU/sp|F8QN50|PA2HS_VIPRE/sp|P0CV89|PA23_CROAT/sp|Q8QG87|PA2A_BOTIN/sp|P0CG56|PA2BB_CRODU/sp|P0CAS4|PA2BD_CRODR/sp|P17935|PA2HL_VIPAA/sp|P0DUN4|PA2A2_BOTBZ/sp|P0DUN3|PA2A1_BOTBZ/sp|P0CAS2|PA2B6_CRODO/sp|P0CAS5|PA2BE_CRODU/sp|P0CAS…	63,K,V/99,K,A/85,K,V/83,Q,V/83,E,V/83,K,A/83,K,A/99,E,V/99,K,A/54,R,-/99,K,V/83,E,V/83,Q,V/99,K,A/68,X,V/74,K,V/83,E,V/83,E,V/83,E,V/59,E,V/70,K,V/82,E,V/99,K,A/99,K,A/83,E,I/99,K,V/83,K,V/83,K,A/99,K,V/99,E,V/83,E,A/99,K,A/83,K,V/85,K,V/99,K,V/82,E,V/83,K,V/99,E,V/99,K,A/83,K,V/99,K,V/82,E,V/99,E,V/83,E,V/83,E,V/83,E,V/	0	RecName: Full=Acidic phospholipase A2 Ts-A4; Short=svPLA2; AltName: Full=Phosphatidylcholine 2-acylhydrolase; Flags: Precursor [Trimeresurus stejnegeri]	Trimeresurus stejnegeri	28.6	28.6	1	0.11	1	139	Q6H3C7.1
			VSeo_28e29e.485.485.11 File:"VSeo_28e29e.raw", NativeID:"controllerType=0 controllerNumber=1 scan=485"	PLA2	MQFETLIMKIAGRSGVWWYGSYGCYCGAGGQGR	1,Oxidation[M];8,Oxidation[M];26,Carbamidomethyl[C];	3721.68	11	0	3721.68	0.00273	1.68895	0.387051	sp|P00625|PA2A1_OVOOK/	18,L,P/	2	phospholipase A2 [Ovophis okinavensis]	Ovophis okinavensis	71.2	71.2	1	3e-17	1	139	AHJ09561.1
			VSeo_28e29e.219.219.2 File:"VSeo_28e29e.raw", NativeID:"controllerType=0 controllerNumber=1 scan=219"	PLA2	CCFVHDCCYGK	0,Acetyl[ProteinN-term];2,Carbamidomethyl[C];3,Phe->Met[F];7,Carbamidomethyl[C];8,Carbamidomethyl[C];	1474.53	2	0.60368	1474.5	0.024742	0.797623	0.999983	sp|P81478|PA2A2_TRIGA/sp|P0DUN0|PA23_BOTHY/sp|Q9PVF1|PA2AA_CALRH/sp|P86456|PA2A4_BOTAL/sp|Q7ZTA6|PA2AB_CROVV/sp|Q6H3C7|PA2AD_TRIST/sp|P81243|PA2A_BOTJA/sp|P14418|PA2A_GLOHA/sp|P20476|PA2A1_TRIGA/sp|B3EWP6|PA2_LACMR/sp|P81479|PA2A4_TRIGA/sp|O42190|PA2A6_GLOHA/sp|Q9PVF0|PA2AB_CALRH/sp|Q800C1|PA2AH_CROVV/sp|C0HKC4|PA2B1_AGKPC/sp|P51972|PA2B1_AGKPI/sp|Q91506|PA2A1_PROMU/sp|P24027|PA2BA_CRODU/sp|P0062…	42,R,V/38,R,N/45,R,V/41,R,V/58,R,V/58,R,V/42,R,V/42,R,V/58,R,V/42,R,V/42,R,V/42,R,V/45,R,V/58,R,A/42,R,V/42,R,V/42,R,V/58,R,L/58,R,V/42,R,V/58,R,L/42,R,V/58,R,V/58,R,A/58,R,V/58,R,V/42,R,L/42,R,L/58,R,L/34,R,-/42,R,V/42,R,V/42,R,V/42,R,V/58,R,V/42,R,V/42,R,L/42,R,L/25,R,W/58,R,V/58,R,V/58,R,V/58,R,L/41,R,A/58,R,L/58,R,L/58,R,L/58,R,A/58,R,V/58,R,L/42,R,V/42,R,V/43,R,L/58,R,V/42,R,V/58,R,V/58,R,A/…	0	RecName: Full=Phospholipase A2 3; Short=BdsPLA2 III; Short=svPLA2; AltName: Full=Phosphatidylcholine 2-acylhydrolase [Bothrops diporus]	Bothrops diporus	43.9	43.9	1	7e-07	1	45	C0HJP9.1
			VSeo_28e29e.203.203.2 File:"VSeo_28e29e.raw", NativeID:"controllerType=0 controllerNumber=1 scan=203"	PLA2	LGNKGKPK	3,Deamidated[N];	842.504	2	0.60368	842.509	-0.005371	2.71569	0.999989	sp|P17935|PA2HL_VIPAA/	45,G,D/	2	RecName: Full=Basic phospholipase A2 homolog ammodytin L; Short=AMDL; Short=AtnL; Short=svPLA2 homolog; Flags: Precursor [Vipera ammodytes ammodytes]	Vipera ammodytes ammodytes	26.9	26.9	1	0.53	1	138	P17935.1
			VSeo_28f.80.80.2 File:"VSeo_28f.raw", NativeID:"controllerType=0 controllerNumber=1 scan=80"	VEGF	CSGCCTDESLK	1,Carbamidomethyl[C];4,Carbamidomethyl[C];5,Carbamidomethyl[C];	1316.48	2	0	1316.49	-0.01037	14.5191	5.18622e-06	sp|P83942|TXVE_VIPAP/sp|P67863|TXVE_VIPAA/sp|P82475|TXVE2_MACLB/	44,R,C/68,R,C/44,R,C/	0	vammin-1' [Vipera ammodytes ammodytes]	Vipera ammodytes ammodytes	39.2	39.2	1	4e-05	1	145	APB93447.1
			VSeo_28f.236.236.3 File:"VSeo_28f.raw", NativeID:"controllerType=0 controllerNumber=1 scan=236"	VEGF	VRPFLEVHER	0,unknown[196.085 Da][111][ProteinN-term];	1392.73	3	0	1392.74	-0.009465	14.9332	1.18295e-05	sp|P83942|TXVE_VIPAP/sp|P67863|TXVE_VIPAA/	1,Q,S/25,Q,S/	1	vammin-1' [Vipera ammodytes ammodytes]	Vipera ammodytes ammodytes	36.7	36.7	1	0.0003	1	145	APB93447.1
			VSeo_28f.194.194.3 File:"VSeo_28f.raw", NativeID:"controllerType=0 controllerNumber=1 scan=194"	VEGF	PFLEVHER		1026.53	3	0	1026.54	-0.00394	11.821	3.06331e-05	sp|P83942|TXVE_VIPAP/sp|P67863|TXVE_VIPAA/	3,R,S/27,R,S/	0	vammin-1' [Vipera ammodytes ammodytes]	Vipera ammodytes ammodytes	30.3	30.3	1	0.031	1	145	APB93447.1
			VSeo_28f.179.179.2 File:"VSeo_28f.raw", NativeID:"controllerType=0 controllerNumber=1 scan=179"	VEGF	HTVDLQIMR	8,Oxidation[M];	1128.57	2	0	1128.58	-0.00844	10.0762	0.000107238	sp|P83942|TXVE_VIPAP/sp|P67863|TXVE_VIPAA/	61,K,V/85,K,V/	0	vammin-1' [Vipera ammodytes ammodytes]	Vipera ammodytes ammodytes	34.1	34.1	1	0.002	1	145	APB93447.1
			VSeo_28f.68.68.3 File:"VSeo_28f.raw", NativeID:"controllerType=0 controllerNumber=1 scan=68"	VEGF	FTEHTACECRPR	7,Carbamidomethyl[C];9,Carbamidomethyl[C];	1563.67	3	0	1563.68	-0.004873	7.34405	0.000425764	sp|P83942|TXVE_VIPAP/sp|P67863|TXVE_VIPAA/sp|P82475|TXVE2_MACLB/	84,K,R/108,K,R/84,K,R/	1	vammin-1' [Vipera ammodytes ammodytes]	Vipera ammodytes ammodytes	44.8	44.8	1	5e-07	1	145	APB93447.1
			VSeo_28f.62.62.3 File:"VSeo_28f.raw", NativeID:"controllerType=0 controllerNumber=1 scan=62"	VEGF	FTEHTDCECRPQS	9,unknown[11.070 Da][C];	1563.67	3	0	1563.69	-0.013226	5.84159	0.000506358	sp|C0K3N2|TXVE_AGKPI/	108,Q,A/	1	RecName: Full=Snake venom vascular endothelial growth factor toxin apiscin; Short=svVEGF; AltName: Full=VEGF-F; Flags: Precursor [Agkistrodon piscivorus piscivorus]	Agkistrodon piscivorus piscivorus	48.1	48.1	1	4e-08	1	124	C0K3N2.1
			VSeo_28f.219.219.3 File:"VSeo_28f.raw", NativeID:"controllerType=0 controllerNumber=1 scan=219"	VEGF	HTVDLQIMR		1112.59	3	0	1112.59	0.000225	10.9491	0.00100667	sp|P83942|TXVE_VIPAP/sp|P67863|TXVE_VIPAA/	61,K,V/85,K,V/	0	vammin-1' [Vipera ammodytes ammodytes]	Vipera ammodytes ammodytes	34.1	34.1	1	0.002	1	145	APB93447.1
			VSeo_28f.218.218.2 File:"VSeo_28f.raw", NativeID:"controllerType=0 controllerNumber=1 scan=218"	VEGF	HTVDLQIMRV	9,Arg->Gly[R];	1112.58	2	0	1112.58	0.004427	4.84375	0.00158634	sp|P83942|TXVE_VIPAP/sp|P67863|TXVE_VIPAA/	61,K,N/85,K,N/	1	vammin-1' [Vipera ammodytes ammodytes]	Vipera ammodytes ammodytes	37.1	37.1	1	0.0002	1	145	APB93447.1
			VSeo_28f.185.185.2 File:"VSeo_28f.raw", NativeID:"controllerType=0 controllerNumber=1 scan=185"	VEGF	PSCVAVLR	3,Carbamidomethyl[C];8,Deamidated[R];	902.491	2	0	902.476	0.014275	4.76605	0.00220526	sp|C0K3N1|TXVE_BITAR/sp|P67861|TXVE_DABRR/sp|P83942|TXVE_VIPAP/sp|P0DL42|TXVE_DABSI/sp|P67863|TXVE_VIPAA/sp|P82475|TXVE2_MACLB/	60,R,C/60,R,C/36,R,C/36,R,C/60,R,C/36,R,C/	0	RecName: Full=Snake venom vascular endothelial growth factor toxin barietin; Short=svVEGF; AltName: Full=VEGF-F; Flags: Precursor [Bitis arietans]	Bitis arietans	28.2	28.2	1	0.18	1	150	C0K3N1.1
			VSeo_28f.234.234.3 File:"VSeo_28f.raw", NativeID:"controllerType=0 controllerNumber=1 scan=234"	VEGF	GQVRPFLEVHER	0,unknown[196.085 Da][111][ProteinN-term];	1577.81	3	0	1577.82	-0.008321	9.13889	0.00734408	sp|P67863|TXVE_VIPAA/	23,Q,S/	1	vammin-1' [Vipera ammodytes ammodytes]	Vipera ammodytes ammodytes	42.6	42.6	1	3e-06	1	145	APB93447.1
			VSeo_28f.98.98.2 File:"VSeo_28f.raw", NativeID:"controllerType=0 controllerNumber=1 scan=98"	VEGF	RCSGCCTDESLK	1,Arg->Asn[R];5,Carbamidomethyl[C];6,Carbamidomethyl[C];	1373.5	2	0	1373.51	-0.008143	1.80896	0.0662044	sp|P83942|TXVE_VIPAP/sp|P67863|TXVE_VIPAA/sp|P82475|TXVE2_MACLB/	43,L,C/67,L,C/43,L,C/	1	vammin-1' [Vipera ammodytes ammodytes]	Vipera ammodytes ammodytes	42.6	42.6	1	3e-06	1	145	APB93447.1
			VSeo_28f.162.162.2 File:"VSeo_28f.raw", NativeID:"controllerType=0 controllerNumber=1 scan=162"	VEGF	CVAVLR	1,Carbamidomethyl[C];	717.406	2	0	717.408	-0.001702	1.00989	0.0689186	sp|C0K3N1|TXVE_BITAR/sp|P67861|TXVE_DABRR/sp|P83942|TXVE_VIPAP/sp|P0DL42|TXVE_DABSI/sp|P67863|TXVE_VIPAA/sp|P82475|TXVE2_MACLB/	62,S,C/62,S,C/38,S,C/38,S,C/62,S,C/38,S,C/	0	RecName: Full=Snake venom vascular endothelial growth factor toxin barietin; Short=svVEGF; AltName: Full=VEGF-F; Flags: Precursor [Bitis arietans]	Bitis arietans	22.3	22.3	1	14	1	150	C0K3N1.1
			VSeo_28f.299.299.3 File:"VSeo_28f.raw", NativeID:"controllerType=0 controllerNumber=1 scan=299"	VEGF	EISDIFRPSCVAVLR	10,Carbamidomethyl[C];	1761.92	3	0	1761.93	-0.009625	0.931219	0.0808778	sp|P67861|TXVE_DABRR/sp|P83942|TXVE_VIPAP/sp|P0DL42|TXVE_DABSI/sp|P67863|TXVE_VIPAA/sp|P82475|TXVE2_MACLB/	53,D,C/29,D,C/29,D,C/53,D,C/29,D,C/	1	vammin-1' [Vipera ammodytes ammodytes]	Vipera ammodytes ammodytes	51.5	51.5	1	4e-09	1	145	APB93447.1
			VSeo_28f.42.42.2 File:"VSeo_28f.raw", NativeID:"controllerType=0 controllerNumber=1 scan=42"	VEGF	QGEPDGPK		827.387	2	0	827.389	-0.00202	0.984252	0.0939289	sp|P83942|TXVE_VIPAP/sp|P67863|TXVE_VIPAA/sp|P82475|TXVE2_MACLB/	98,K,E/122,K,E/98,K,E/	0	vammin-1' [Vipera ammodytes ammodytes]	Vipera ammodytes ammodytes	28.2	28.2	1	0.18	1	145	APB93447.1
			VSeo_28f.164.164.3 File:"VSeo_28f.raw", NativeID:"controllerType=0 controllerNumber=1 scan=164"	VEGF	VAVLRCSGCCTDESMK	0,unknown[196.085 Da][111][ProteinN-term];6,Carbamidomethyl[C];9,Carbamidomethyl[C];10,Carbamidomethyl[C];15,Oxidation[M];	1999.83	3	0	1999.83	-0.008231	0.720822	0.103075	sp|P67861|TXVE_DABRR/sp|P0DL42|TXVE_DABSI/	63,C,C/39,C,C/	1	RecName: Full=Snake venom vascular endothelial growth factor toxin VR-1; Short=svVEGF; AltName: Full=VEGF-F; Flags: Precursor [Daboia russelii]	Daboia russelii	55.8	55.8	1	2e-10	1	144	P67861.2
			VSeo_28f.47.47.2 File:"VSeo_28f.raw", NativeID:"controllerType=0 controllerNumber=1 scan=47"	VEGF	CTPVGK	1,Carbamidomethyl[C];	661.332	2	0	661.334	-0.002153	3.35694	0.105437	sp|P67861|TXVE_DABRR/sp|P83942|TXVE_VIPAP/sp|P0DL42|TXVE_DABSI/sp|P67863|TXVE_VIPAA/sp|P82475|TXVE2_MACLB/	79,K,H/55,K,H/55,K,H/79,K,H/55,K,H/	0	vammin-1' [Vipera ammodytes ammodytes]	Vipera ammodytes ammodytes	22.3	22.3	1	14	1	145	APB93447.1
			VSeo_28f.216.216.3 File:"VSeo_28f.raw", NativeID:"controllerType=0 controllerNumber=1 scan=216"	VEGF	PFLDVYER		1038.53	3	0	1038.53	0.009489	1.00426	0.28413	sp|P67861|TXVE_DABRR/	27,R,S/	0	RecName: Full=Snake venom vascular endothelial growth factor toxin VR-1; Short=svVEGF; AltName: Full=VEGF-F; Flags: Precursor [Daboia russelii]	Daboia russelii	30.8	30.8	1	0.023	1	144	P67861.2
			VSeo_28f.407.407.3 File:"VSeo_28f.raw", NativeID:"controllerType=0 controllerNumber=1 scan=407"	VEGF	AILFCIQGWPSGTVQGQVRPFLDVYER	0,unknown[196.085 Da][111][ProteinN-term];19,Arg->Asn[R];	3148.62	3	0	3148.56	0.060137	1.83655	0.302229	sp|P67861|TXVE_DABRR/	8,V,S/	1	RecName: Full=Snake venom vascular endothelial growth factor toxin barietin; Short=svVEGF; AltName: Full=VEGF-F; Flags: Precursor [Bitis arietans]	Bitis arietans	112	112	1	5e-33	1	150	C0K3N1.1
			VSeo_28f.543.543.11 File:"VSeo_28f.raw", NativeID:"controllerType=0 controllerNumber=1 scan=543"	VEGF	AAYLLAVAILFCIQGWPSGTVQGEVRPFMEVYQRSVCQPRETLVSILEEYPDK	0,unknown[196.085 Da][111][ProteinN-term];12,Carbamidomethyl[C];34,Arg->Asn[R];37,Carbamidomethyl[C];40,Arg->Asn[R];	6140.98	11	0	6141.01	-0.029634	0.946886	0.404549	sp|C0K3N1|TXVE_BITAR/	1,M,I/	3	RecName: Full=Snake venom vascular endothelial growth factor toxin barietin; Short=svVEGF; AltName: Full=VEGF-F; Flags: Precursor [Bitis arietans]	Bitis arietans	112	112	1	5e-33	1	150	C0K3N1.1
			VSeo_28g.87.87.2 File:"VSeo_28g.raw", NativeID:"controllerType=0 controllerNumber=1 scan=87"	VEGF	CSGCCTDESLK	1,Carbamidomethyl[C];4,Carbamidomethyl[C];5,Carbamidomethyl[C];	1316.48	2	0	1316.49	-0.008539	8.67664	0.00180491	sp|P83942|TXVE_VIPAP/sp|P67863|TXVE_VIPAA/sp|P82475|TXVE2_MACLB/	44,R,C/68,R,C/44,R,C/	0	vammin-1' [Vipera ammodytes ammodytes]	Vipera ammodytes ammodytes	39.2	39.2	1	4e-05	1	145	APB93447.1
			VSeo_28g.184.184.2 File:"VSeo_28g.raw", NativeID:"controllerType=0 controllerNumber=1 scan=184"	VEGF	PSCVAVLR	3,Carbamidomethyl[C];	901.488	2	0	901.492	-0.004333	9.29193	0.00262303	sp|C0K3N1|TXVE_BITAR/sp|P67861|TXVE_DABRR/sp|P83942|TXVE_VIPAP/sp|P0DL42|TXVE_DABSI/sp|P67863|TXVE_VIPAA/sp|P82475|TXVE2_MACLB/	60,R,C/60,R,C/36,R,C/36,R,C/60,R,C/36,R,C/	0	RecName: Full=Snake venom vascular endothelial growth factor toxin barietin; Short=svVEGF; AltName: Full=VEGF-F; Flags: Precursor [Bitis arietans]	Bitis arietans	28.2	28.2	1	0.18	1	150	C0K3N1.1
			VSeo_28g.192.192.3 File:"VSeo_28g.raw", NativeID:"controllerType=0 controllerNumber=1 scan=192"	VEGF	PFLEVHER		1026.53	3	0	1026.54	-0.005497	9.50987	0.00282173	sp|P83942|TXVE_VIPAP/sp|P67863|TXVE_VIPAA/	3,R,S/27,R,S/	0	vammin-1' [Vipera ammodytes ammodytes]	Vipera ammodytes ammodytes	30.3	30.3	1	0.031	1	145	APB93447.1
			VSeo_28g.66.66.3 File:"VSeo_28g.raw", NativeID:"controllerType=0 controllerNumber=1 scan=66"	VEGF	FTEHTACECRPR	7,Carbamidomethyl[C];9,Carbamidomethyl[C];	1563.67	3	0	1563.68	-0.006704	7.10931	0.00493851	sp|P83942|TXVE_VIPAP/sp|P67863|TXVE_VIPAA/sp|P82475|TXVE2_MACLB/	84,K,R/108,K,R/84,K,R/	1	vammin-1' [Vipera ammodytes ammodytes]	Vipera ammodytes ammodytes	44.8	44.8	1	5e-07	1	145	APB93447.1
			VSeo_28g.180.180.2 File:"VSeo_28g.raw", NativeID:"controllerType=0 controllerNumber=1 scan=180"	VEGF	HTVDLQIMR	8,Oxidation[M];	1128.57	2	0	1128.58	-0.008318	8.79426	0.0176649	sp|P83942|TXVE_VIPAP/sp|P67863|TXVE_VIPAA/	61,K,V/85,K,V/	0	vammin-1' [Vipera ammodytes ammodytes]	Vipera ammodytes ammodytes	34.1	34.1	1	0.002	1	145	APB93447.1
			VSeo_28g.237.237.3 File:"VSeo_28g.raw", NativeID:"controllerType=0 controllerNumber=1 scan=237"	VEGF	VRPFLEVHER	0,unknown[196.085 Da][111][ProteinN-term];	1392.73	3	0	1392.74	-0.011571	13.9197	0.025926	sp|P83942|TXVE_VIPAP/sp|P67863|TXVE_VIPAA/	1,Q,S/25,Q,S/	1	vammin-1' [Vipera ammodytes ammodytes]	Vipera ammodytes ammodytes	36.7	36.7	1	0.0003	1	145	APB93447.1
			VSeo_28g.162.162.3 File:"VSeo_28g.raw", NativeID:"controllerType=0 controllerNumber=1 scan=162"	VEGF	FLEVHER		929.482	3	0	929.484	-0.002115	1.94159	0.063127	sp|P83942|TXVE_VIPAP/sp|P67863|TXVE_VIPAA/	4,P,S/28,P,S/	0	vammin-1' [Vipera ammodytes ammodytes]	Vipera ammodytes ammodytes	26.9	26.9	1	0.42	1	145	APB93447.1
			VSeo_28g.235.235.3 File:"VSeo_28g.raw", NativeID:"controllerType=0 controllerNumber=1 scan=235"	VEGF	GQVRPFLEVHER	0,unknown[196.085 Da][111][ProteinN-term];	1577.81	3	0	1577.82	-0.009969	2.97601	0.18195	sp|P67863|TXVE_VIPAA/	23,Q,S/	1	vammin-1' [Vipera ammodytes ammodytes]	Vipera ammodytes ammodytes	42.6	42.6	1	3e-06	1	145	APB93447.1
			VSeo_28g.47.47.2 File:"VSeo_28g.raw", NativeID:"controllerType=0 controllerNumber=1 scan=47"	VEGF	CTPVGK	1,Carbamidomethyl[C];	661.333	2	0	661.334	-0.001055	2.77013	0.263129	sp|P67861|TXVE_DABRR/sp|P83942|TXVE_VIPAP/sp|P0DL42|TXVE_DABSI/sp|P67863|TXVE_VIPAA/sp|P82475|TXVE2_MACLB/	79,K,H/55,K,H/55,K,H/79,K,H/55,K,H/	0	vammin-1' [Vipera ammodytes ammodytes]	Vipera ammodytes ammodytes	22.3	22.3	1	14	1	145	APB93447.1
			VSeo_28g.213.213.3 File:"VSeo_28g.raw", NativeID:"controllerType=0 controllerNumber=1 scan=213"	VEGF	PFLDVYER		1038.53	3	0.61081	1038.53	0.008024	1.01816	0.999996	sp|P67861|TXVE_DABRR/	27,R,S/	0	RecName: Full=Snake venom vascular endothelial growth factor toxin VR-1; Short=svVEGF; AltName: Full=VEGF-F; Flags: Precursor [Daboia russelii]	Daboia russelii	30.8	30.8	1	0.023	1	144	P67861.2
			VSeo_29b.167.167.2 File:"VSeo_29b.raw", NativeID:"controllerType=0 controllerNumber=1 scan=167"	svMP	KAGTVCR	1,unknown[219.090 Da][K];6,Carbamidomethyl[C];	1010.5	2	0	1010.51	-0.004908	8.85953	0.271796	sp|Q7LZI5|VM2I1_GLOUS/sp|P17497|VM2_BITAR/	39,I,V/54,K,I/	1	disintegrin and metalloproteinase domain-containing protein 20-like [Thamnophis elegans]	Thamnophis elegans	24.8	52.8	1	2.3	1	735	XP_032069188.1
			VSeo_29b.140.140.3 File:"VSeo_29b.raw", NativeID:"controllerType=0 controllerNumber=1 scan=140"	svMP	GEECDCGSPGNPCCDAATCKLR	0,Acetyl[ProteinN-term];	2270.84	3	0.77054	2270.86	-0.017167	0.002	0.815306	sp|Q1PBD1|VM2DI_GLOHA/sp|P21858|VM2_GLOBL/sp|Q698K8|VM2L4_GLOBR/sp|O73795|VM2MB_GLOBR/sp|Q7LZI5|VM2I1_GLOUS/sp|Q90WC0|VM2HS_GLOBR/sp|Q90220|VM2H1_GLOHA/	406,A,Q/2,A,Q/248,A,Q/434,A,Q/0,-,P/246,A,Q/409,A,Q/	1	RecName: Full=Zinc metalloproteinase/disintegrin; Contains: RecName: Full=Snake venom metalloproteinase Mt-b; Short=SVMP; Contains: RecName: Full=Disintegrin; Flags: Precursor [Gloydius brevicaudus]	Gloydius brevicaudus	75.7	75.7	1	4e-17	1	505	O73795.2
			VSeo_29c.208.208.3 File:"VSeo_29c.raw", NativeID:"controllerType=0 controllerNumber=1 scan=208"	svMP	FDYSEDPDYGMVDHGTK	1,Oxidation[F](Phe->Tyr[F]);	1991.79	3	0	1991.8	-0.009442	12.2322	9.97374e-05	sp|Q0NZX9|VM3B2_BOTJA/	181,D,C/	0	RecName: Full=Zinc metalloproteinase-disintegrin-like bothrojarin-2; AltName: Full=Snake venom metalloproteinase; Short=SVMP [Bothrops jararaca]	Bothrops jararaca	60.9	60.9	1	3e-12	1	218	Q0NZX9.1
			VSeo_29c.184.184.2 File:"VSeo_29c.raw", NativeID:"controllerType=0 controllerNumber=1 scan=184"	svMP	HCVDVTTAY	2,Carbamidomethyl[C];	1065.46	2	0	1065.47	-0.006431	6.85528	0.00291261	sp|Q9W6M5|VM3AH_DEIAC/	601,G,-/	0	metalloproteinase disintegrin and cysteine-rich protein 6 [Crotalus horridus]	Crotalus horridus	33.3	33.3	1	0.003	1	611	QIS79138.1
			VSeo_29c.274.274.2 File:"VSeo_29c.raw", NativeID:"controllerType=0 controllerNumber=1 scan=274"	svMP	LFCEILP	3,Carbamidomethyl[C];7,Pro->Lys[P];	922.504	2	0	922.507	-0.003026	8.30793	0.00309601	sp|C0LZJ5|VM3LC_MACLN/	160,R,N/	0	metalloproteinase of class P-III MPIII-1 [Vipera ammodytes ammodytes]	Vipera ammodytes ammodytes	27.4	27.4	1	0.27	1	607	AMB36352.1
			VSeo_29c.205.205.2 File:"VSeo_29c.raw", NativeID:"controllerType=0 controllerNumber=1 scan=205"	svMP	GEQYFYCR	3,Gln->Ser[Q];7,Carbamidomethyl[C];	1081.43	2	0	1081.44	-0.006827	11.0073	0.00342952	sp|Q3HTN1|VM3SA_TRIST/	527,K,K/	0	RecName: Full=Zinc metalloproteinase-disintegrin-like stejnihagin-A; AltName: Full=Snake venom metalloproteinase; Short=SVMP; Flags: Precursor [Trimeresurus stejnegeri]	Trimeresurus stejnegeri	32.5	32.5	1	0.005	1	600	Q3HTN1.1
			VSeo_29c.224.224.3 File:"VSeo_29c.raw", NativeID:"controllerType=0 controllerNumber=1 scan=224"	svMP	GPGVNVSPDECFTLK	8,Pro->Lys[P];11,Carbamidomethyl[C];12,Oxidation[F](Phe->Tyr[F]);	1666.84	3	0	1666.81	0.032137	1.38248	0.295312	sp|F8RKW1|VM34_DRYCN/sp|F8RKW0|VM38_DRYCN/sp|F8RKV9|VM39_DRYCN/	522,G,Q/522,K,Q/520,K,Q/	0	RecName: Full=Zinc metalloproteinase-disintegrin-like MTP4; AltName: Full=Snake venom metalloproteinase; Short=SVMP; Flags: Precursor [Drysdalia coronoides]	Drysdalia coronoides	50.7	64.1	1	8e-09	1	613	F8RKW1.1
			VSeo_29c.298.298.2 File:"VSeo_29c.raw", NativeID:"controllerType=0 controllerNumber=1 scan=298"	svMP	GIVEPGTK	5,Pro->Lys[P];	831.495	2	0	831.493	0.001333	0.002	0.537535	sp|Q6X1T6|VM3E6_ECHOC/sp|Q90495|VM3E_ECHCA/	488,K,C/589,K,C/	0	metalloproteinase [Echis pyramidum leakeyi]	Echis pyramidum leakeyi	27.4	27.4	1	0.36	1	625	ADI47671.1
			VSeo_29c.42.42.2 File:"VSeo_29c.raw", NativeID:"controllerType=0 controllerNumber=1 scan=42"	svMP	AGTECRPAR	5,Carbamidomethyl[C];	1017.49	2	0.66381	1017.49	-0.001917	5.9997	0.903857	sp|B8K1W0|VM3DK_DABRR/sp|Q2UXR0|VM3E1_ECHOC/sp|Q6X1T6|VM3E6_ECHOC/sp|Q90495|VM3E_ECHCA/	460,R,D/459,R,D/357,K,D/458,K,D/	1	metalloproteinase [Echis coloratus]	Echis coloratus	31.6	31.6	1	0.013	1	629	ADI47635.1
			VSeo_29c.182.182.3 File:"VSeo_29c.raw", NativeID:"controllerType=0 controllerNumber=1 scan=182"	svMP	QNVPECGFCR	9,Carbamidomethyl[C];	1209.53	3	0.78299	1209.51	0.017916	2.03261	0.983031	sp|F8RKW1|VM34_DRYCN/	537,K,I/	0	RecName: Full=Zinc metalloproteinase-disintegrin-like MTP4; AltName: Full=Snake venom metalloproteinase; Short=SVMP; Flags: Precursor [Drysdalia coronoides]	Drysdalia coronoides	38	38	1	9e-05	1	613	F8RKW1.1
			VSeo_29c.290.290.3 File:"VSeo_29c.raw", NativeID:"controllerType=0 controllerNumber=1 scan=290"	svMP	PPVCGNELLEKGEECDCGSPRNCRDPCCDAATCK	0,Acetyl[ProteinN-term];15,Carbamidomethyl[C];17,Carbamidomethyl[C];23,Carbamidomethyl[C];26,Pro->Lys[P];27,Carbamidomethyl[C];	3913.56	3	0.78579	3913.62	-0.051654	0.004907	0.994212	sp|Q0NZX9|VM3B2_BOTJA/	13,S,L/	3	venom metalloproteinase bothrojarin2 [Bothrops jararaca]	Bothrops jararaca	71.2	71.2	1	1e-16	1	208	ABD34830.2
			VSeo_29c.248.248.2 File:"VSeo_29c.raw", NativeID:"controllerType=0 controllerNumber=1 scan=248"	DI	CGRLFCEILPNTR	5,Oxidation[F](Phe->Tyr[F]);11,Deamidated[N];	1538.75	2	0.7891	1538.75	0.002405	0.746349	0.999183	sp|C0LZJ5|VM3LC_MACLN/	157,K,C/	1	RecName: Full=Disintegrin-like leberagin-C [Macrovipera lebetina transmediterranea]	Macrovipera lebetina transmediterranea	31.2	31.2	1	0.031	1	205	C0LZJ5.1
			VSeo_29f.87.87.2 File:"VSeo_29f.raw", NativeID:"controllerType=0 controllerNumber=1 scan=87"	VEGF	CSGCCTDESLK	1,Carbamidomethyl[C];4,Carbamidomethyl[C];5,Carbamidomethyl[C];	1316.48	2	0	1316.49	-0.011103	14.4484	4.58278e-06	sp|P83942|TXVE_VIPAP/sp|P67863|TXVE_VIPAA/sp|P82475|TXVE2_MACLB/	44,R,C/68,R,C/44,R,C/	0	vammin-1' [Vipera ammodytes ammodytes]	Vipera ammodytes ammodytes	39.2	39.2	1	4e-05	1	145	APB93447.1
			VSeo_29f.236.236.3 File:"VSeo_29f.raw", NativeID:"controllerType=0 controllerNumber=1 scan=236"	VEGF	QVRPFLEVHER	0,Gln->pyro-Glu[AnyN-termQ];	1392.73	3	0	1392.74	-0.007079	13.2865	1.41074e-05	sp|P83942|TXVE_VIPAP/sp|P67863|TXVE_VIPAA/	0,-,S/24,G,S/	1	vammin-1' [Vipera ammodytes ammodytes]	Vipera ammodytes ammodytes	40.1	40.1	1	2e-05	1	145	APB93447.1
			VSeo_29f.191.191.3 File:"VSeo_29f.raw", NativeID:"controllerType=0 controllerNumber=1 scan=191"	VEGF	PFLEVHER		1026.53	3	0	1026.54	-0.005039	9.69806	8.15005e-05	sp|P83942|TXVE_VIPAP/sp|P67863|TXVE_VIPAA/	3,R,S/27,R,S/	0	vammin-1' [Vipera ammodytes ammodytes]	Vipera ammodytes ammodytes	30.3	30.3	1	0.031	1	145	APB93447.1
			VSeo_29f.71.71.3 File:"VSeo_29f.raw", NativeID:"controllerType=0 controllerNumber=1 scan=71"	VEGF	FTEHTACECRPR	7,Carbamidomethyl[C];9,Carbamidomethyl[C];	1563.67	3	0	1563.68	-0.01	7.97615	0.000330647	sp|P83942|TXVE_VIPAP/sp|P67863|TXVE_VIPAA/sp|P82475|TXVE2_MACLB/	84,K,R/108,K,R/84,K,R/	1	vammin-1' [Vipera ammodytes ammodytes]	Vipera ammodytes ammodytes	44.8	44.8	1	5e-07	1	145	APB93447.1
			VSeo_29f.179.179.2 File:"VSeo_29f.raw", NativeID:"controllerType=0 controllerNumber=1 scan=179"	VEGF	HTVDLQIMR	8,Oxidation[M];	1128.57	2	0	1128.58	-0.009295	11.9114	0.000405883	sp|P83942|TXVE_VIPAP/sp|P67863|TXVE_VIPAA/	61,K,V/85,K,V/	0	vammin-1' [Vipera ammodytes ammodytes]	Vipera ammodytes ammodytes	34.1	34.1	1	0.002	1	145	APB93447.1
			VSeo_29f.185.185.2 File:"VSeo_29f.raw", NativeID:"controllerType=0 controllerNumber=1 scan=185"	VEGF	PSCVAVLR	3,Carbamidomethyl[C];8,Deamidated[R];	902.489	2	0	902.476	0.012322	4.74828	0.000712691	sp|C0K3N1|TXVE_BITAR/sp|P67861|TXVE_DABRR/sp|P83942|TXVE_VIPAP/sp|P0DL42|TXVE_DABSI/sp|P67863|TXVE_VIPAA/sp|P82475|TXVE2_MACLB/	60,R,C/60,R,C/36,R,C/36,R,C/60,R,C/36,R,C/	0	RecName: Full=Snake venom vascular endothelial growth factor toxin barietin; Short=svVEGF; AltName: Full=VEGF-F; Flags: Precursor [Bitis arietans]	Bitis arietans	28.2	28.2	1	0.18	1	150	C0K3N1.1
			VSeo_29f.215.215.2 File:"VSeo_29f.raw", NativeID:"controllerType=0 controllerNumber=1 scan=215"	VEGF	HTVDLQIMR		1112.58	2	0	1112.59	-0.005591	5.52338	0.00819477	sp|P83942|TXVE_VIPAP/sp|P67863|TXVE_VIPAA/	61,K,V/85,K,V/	0	vammin-1' [Vipera ammodytes ammodytes]	Vipera ammodytes ammodytes	34.1	34.1	1	0.002	1	145	APB93447.1
			VSeo_29f.44.44.2 File:"VSeo_29f.raw", NativeID:"controllerType=0 controllerNumber=1 scan=44"	VEGF	QGEPDGPK		827.388	2	0	827.389	-0.001349	0.996818	0.408298	sp|P83942|TXVE_VIPAP/sp|P67863|TXVE_VIPAA/sp|P82475|TXVE2_MACLB/	98,K,E/122,K,E/98,K,E/	0	vammin-1' [Vipera ammodytes ammodytes]	Vipera ammodytes ammodytes	28.2	28.2	1	0.18	1	145	APB93447.1
			VSeo_29f.57.57.2 File:"VSeo_29f.raw", NativeID:"controllerType=0 controllerNumber=1 scan=57"	VEGF	CTPVGK	1,Carbamidomethyl[C];	661.333	2	0	661.334	-0.000872	0.951671	0.43063	sp|P67861|TXVE_DABRR/sp|P83942|TXVE_VIPAP/sp|P0DL42|TXVE_DABSI/sp|P67863|TXVE_VIPAA/sp|P82475|TXVE2_MACLB/	79,K,H/55,K,H/55,K,H/79,K,H/55,K,H/	0	vammin-1' [Vipera ammodytes ammodytes]	Vipera ammodytes ammodytes	22.3	22.3	1	14	1	145	APB93447.1
			VSeo_29f.213.213.3 File:"VSeo_29f.raw", NativeID:"controllerType=0 controllerNumber=1 scan=213"	VEGF	PFLDVYER		1038.53	3	0	1038.53	0.009031	1.78063	0.462952	sp|P67861|TXVE_DABRR/	27,R,S/	0	RecName: Full=Snake venom vascular endothelial growth factor toxin VR-1; Short=svVEGF; AltName: Full=VEGF-F; Flags: Precursor [Daboia russelii]	Daboia russelii	30.8	30.8	1	0.023	1	144	P67861.2
			VSeo_29g.68.68.3 File:"VSeo_29g.raw", NativeID:"controllerType=0 controllerNumber=1 scan=68"	VEGF	FTEHTDCECRPQS	9,unknown[11.070 Da][C];	1563.67	3	0	1563.69	-0.016156	6.20873	0.000631034	sp|C0K3N2|TXVE_AGKPI/	108,Q,A/	1	RecName: Full=Snake venom vascular endothelial growth factor toxin apiscin; Short=svVEGF; AltName: Full=VEGF-F; Flags: Precursor [Agkistrodon piscivorus piscivorus]	Agkistrodon piscivorus piscivorus	48.1	48.1	1	4e-08	1	124	C0K3N2.1
			VSeo_29g.84.84.2 File:"VSeo_29g.raw", NativeID:"controllerType=0 controllerNumber=1 scan=84"	VEGF	CSGCCTDESLK	1,Carbamidomethyl[C];4,Carbamidomethyl[C];5,Carbamidomethyl[C];	1316.48	2	0	1316.49	-0.00683	11.6172	0.00314203	sp|P83942|TXVE_VIPAP/sp|P67863|TXVE_VIPAA/sp|P82475|TXVE2_MACLB/	44,R,C/68,R,C/44,R,C/	0	vammin-1' [Vipera ammodytes ammodytes]	Vipera ammodytes ammodytes	39.2	39.2	1	4e-05	1	145	APB93447.1
			VSeo_29g.191.191.3 File:"VSeo_29g.raw", NativeID:"controllerType=0 controllerNumber=1 scan=191"	VEGF	PFLEVHE	6,unknown[156.115 Da][H];	1026.53	3	0	1026.55	-0.017594	5.67089	0.00558478	sp|P83942|TXVE_VIPAP/sp|P67863|TXVE_VIPAA/	3,R,R/27,R,R/	0	vammin-1' [Vipera ammodytes ammodytes]	Vipera ammodytes ammodytes	26.9	26.9	1	0.42	1	145	APB93447.1
			VSeo_29g.239.239.3 File:"VSeo_29g.raw", NativeID:"controllerType=0 controllerNumber=1 scan=239"	VEGF	VRPFLEVHER	0,unknown[196.085 Da][111][ProteinN-term];	1392.73	3	0	1392.74	-0.008366	13.9347	0.00566882	sp|P83942|TXVE_VIPAP/sp|P67863|TXVE_VIPAA/	1,Q,S/25,Q,S/	1	vammin-1' [Vipera ammodytes ammodytes]	Vipera ammodytes ammodytes	36.7	36.7	1	0.0003	1	145	APB93447.1
			VSeo_29g.192.192.2 File:"VSeo_29g.raw", NativeID:"controllerType=0 controllerNumber=1 scan=192"	VEGF	PFLEVHER		1026.53	2	0	1026.54	-0.005239	11.1783	0.00584998	sp|P83942|TXVE_VIPAP/sp|P67863|TXVE_VIPAA/	3,R,S/27,R,S/	0	vammin-1' [Vipera ammodytes ammodytes]	Vipera ammodytes ammodytes	30.3	30.3	1	0.031	1	145	APB93447.1
			VSeo_29g.179.179.2 File:"VSeo_29g.raw", NativeID:"controllerType=0 controllerNumber=1 scan=179"	VEGF	HTVDLQIMR	8,Oxidation[M];	1128.57	2	0	1128.58	-0.008318	10.6719	0.00910216	sp|P83942|TXVE_VIPAP/sp|P67863|TXVE_VIPAA/	61,K,V/85,K,V/	0	vammin-1' [Vipera ammodytes ammodytes]	Vipera ammodytes ammodytes	34.1	34.1	1	0.002	1	145	APB93447.1
			VSeo_29g.65.65.3 File:"VSeo_29g.raw", NativeID:"controllerType=0 controllerNumber=1 scan=65"	VEGF	FTEHTACECRPR	7,Carbamidomethyl[C];9,Carbamidomethyl[C];	1563.67	3	0	1563.68	-0.005972	7.17826	0.0186521	sp|P83942|TXVE_VIPAP/sp|P67863|TXVE_VIPAA/sp|P82475|TXVE2_MACLB/	84,K,R/108,K,R/84,K,R/	1	vammin-1' [Vipera ammodytes ammodytes]	Vipera ammodytes ammodytes	44.8	44.8	1	5e-07	1	145	APB93447.1
			VSeo_29g.218.218.2 File:"VSeo_29g.raw", NativeID:"controllerType=0 controllerNumber=1 scan=218"	VEGF	HTVDLQIMR		1112.58	2	0	1112.59	-0.007056	5.6786	0.0673743	sp|P83942|TXVE_VIPAP/sp|P67863|TXVE_VIPAA/	61,K,V/85,K,V/	0	vammin-1' [Vipera ammodytes ammodytes]	Vipera ammodytes ammodytes	34.1	34.1	1	0.002	1	145	APB93447.1
			VSeo_29g.161.161.3 File:"VSeo_29g.raw", NativeID:"controllerType=0 controllerNumber=1 scan=161"	VEGF	FLEVHER		929.484	3	0	929.484	-0.000192	1.83851	0.157489	sp|P83942|TXVE_VIPAP/sp|P67863|TXVE_VIPAA/	4,P,S/28,P,S/	0	vammin-1' [Vipera ammodytes ammodytes]	Vipera ammodytes ammodytes	26.9	26.9	1	0.42	1	145	APB93447.1
			VSeo_29g.162.162.2 File:"VSeo_29g.raw", NativeID:"controllerType=0 controllerNumber=1 scan=162"	VEGF	CVAVLR	1,Carbamidomethyl[C];	717.406	2	0	717.408	-0.00158	1.00989	0.212099	sp|C0K3N1|TXVE_BITAR/sp|P67861|TXVE_DABRR/sp|P83942|TXVE_VIPAP/sp|P0DL42|TXVE_DABSI/sp|P67863|TXVE_VIPAA/sp|P82475|TXVE2_MACLB/	62,S,C/62,S,C/38,S,C/38,S,C/62,S,C/38,S,C/	0	RecName: Full=Snake venom vascular endothelial growth factor toxin barietin; Short=svVEGF; AltName: Full=VEGF-F; Flags: Precursor [Bitis arietans]	Bitis arietans	22.3	22.3	1	14	1	150	C0K3N1.1
			VSeo_29g.189.189.3 File:"VSeo_29g.raw", NativeID:"controllerType=0 controllerNumber=1 scan=189"	VEGF	PDEVAHLFR		1083.56	3	0	1083.56	-0.001323	0.996113	0.212636	sp|B0VXV4|TXVE_SISCA/sp|B0VXV3|TXVE1_SISCA/	51,H,P/51,H,P/	0	RecName: Full=Snake venom vascular endothelial growth factor toxin 1; Short=svVEGF; AltName: Full=VEGF-F; Flags: Precursor [Sistrurus catenatus edwardsi]	Sistrurus catenatus edwardsi	32.9	32.9	1	0.005	1	149	B0VXV3.1
			VSeo_29g.293.293.3 File:"VSeo_29g.raw", NativeID:"controllerType=0 controllerNumber=1 scan=293"	VEGF	ESLKCTPVGKHTVDLQIMR	0,unknown[196.085 Da][111][ProteinN-term];	2266.14	3	0	2266.17	-0.025393	0.962659	0.269414	sp|P83942|TXVE_VIPAP/sp|P67863|TXVE_VIPAA/	51,D,V/75,D,V/	2	vammin-1' [Vipera ammodytes ammodytes]	Vipera ammodytes ammodytes	65.1	65.1	1	1e-13	1	145	APB93447.1
			VSeo_29g.315.315.3 File:"VSeo_29g.raw", NativeID:"controllerType=0 controllerNumber=1 scan=315"	VEGF	SGCCTDESLKCTPVGKHTVDLQIMR	0,Acetyl[ProteinN-term];1,Carbamidomethyl[S](Gly[S]);3,Carbamidomethyl[C];4,Carbamidomethyl[C];24,Oxidation[M];	2950.33	3	0	2950.35	-0.02183	0.007783	0.312593	sp|P83942|TXVE_VIPAP/sp|P67863|TXVE_VIPAA/	45,C,V/69,C,V/	2	RecName: Full=Snake venom vascular endothelial growth factor toxin HF; Short=svVEGF; AltName: Full=Heparin-binding dimeric hypotensive factor; AltName: Full=VEGF-F [Vipera aspis aspis]	Vipera aspis aspis	85	85	1	4e-20	1	110	P83942.1
			VSeo_29g.46.46.2 File:"VSeo_29g.raw", NativeID:"controllerType=0 controllerNumber=1 scan=46"	VEGF	CTPVGK	1,Carbamidomethyl[C];	661.332	2	0	661.334	-0.00197	1.96703	0.411238	sp|P67861|TXVE_DABRR/sp|P83942|TXVE_VIPAP/sp|P0DL42|TXVE_DABSI/sp|P67863|TXVE_VIPAA/sp|P82475|TXVE2_MACLB/	79,K,H/55,K,H/55,K,H/79,K,H/55,K,H/	0	vammin-1' [Vipera ammodytes ammodytes]	Vipera ammodytes ammodytes	22.3	22.3	1	14	1	145	APB93447.1
			VSeo_30b.262.262.2 File:"VSeo_30b.raw", NativeID:"controllerType=0 controllerNumber=1 scan=262"	svMP	LFCEILP	3,Carbamidomethyl[C];7,Pro->Lys[P];	922.502	2	0	922.507	-0.004979	8.15344	0.0544152	sp|C0LZJ5|VM3LC_MACLN/	160,R,N/	0	metalloproteinase of class P-III MPIII-1 [Vipera ammodytes ammodytes]	Vipera ammodytes ammodytes	27.4	27.4	1	0.27	1	607	AMB36352.1
			VSeo_30b.178.178.2 File:"VSeo_30b.raw", NativeID:"controllerType=0 controllerNumber=1 scan=178"	svMP	HCVDVTTAY	2,Carbamidomethyl[C];	1065.46	2	0	1065.47	-0.006919	7.63327	0.150513	sp|Q9W6M5|VM3AH_DEIAC/	601,G,-/	0	metalloproteinase disintegrin and cysteine-rich protein 6 [Crotalus horridus]	Crotalus horridus	33.3	33.3	1	0.003	1	611	QIS79138.1
			VSeo_30b.242.242.2 File:"VSeo_30b.raw", NativeID:"controllerType=0 controllerNumber=1 scan=242"	CYS	CRKGATDLENCA	11,Carbamidomethyl[C];12,Ala->Lys[A];	1394.64	2	0	1394.65	-0.013447	6.09025	0.231212	sp|J3SE80|CYT2_CROAD/	90,V,F/	2	cystatin-2 [Protobothrops mucrosquamatus]	Protobothrops mucrosquamatus	28.2	28.2	1	0.19	1	137	XP_015682709.1
			VSeo_30b.200.200.2 File:"VSeo_30b.raw", NativeID:"controllerType=0 controllerNumber=1 scan=200"	CRISP	WSYFYVC	7,GG[C](Dicarbamidomethyl[C]);	1081.44	2	0	1081.44	-0.009636	2.83604	0.279926	sp|P84805|CRVP1_NAJKA/sp|Q7T1K6|CRVP1_NAJAT/	156,A,Q/156,A,Q/	0	RecName: Full=Cysteine-rich venom protein natrin-1; AltName: Full=Cysteine-rich venom protein 1; AltName: Full=NA-CRVP1; AltName: Full=Protein G2a; Flags: Precursor [Naja atra]	Naja atra	30.8	30.8	1	0.017	1	239	Q7T1K6.1
			VSeo_30b.313.313.2 File:"VSeo_30b.raw", NativeID:"controllerType=0 controllerNumber=1 scan=313"	CYS	CKEALGTR	4,Ala->Lys[A];	934.503	2	0	934.514	-0.011269	0.002	0.41931	sp|J3SE80|CYT2_CROAD/	18,I,L/	1	cystatin-2 [Protobothrops mucrosquamatus]	Protobothrops mucrosquamatus	28.2	28.2	1	0.19	1	137	XP_015682709.1
			VSeo_30c31d.197.197.2 File:"VSeo_30c31d.raw", NativeID:"controllerType=0 controllerNumber=1 scan=197"	PLA2	AAAICFR	5,Carbamidomethyl[C];	808.408	2	0.069243	808.413	-0.005622	7.35671	0.0587842	sp|P81478|PA2A2_TRIGA/sp|P14418|PA2A_GLOHA/sp|P0DKU1|PA2H_GLOUS/sp|O42190|PA2A6_GLOHA/sp|O42189|PA2A5_GLOHA/sp|C0HKC4|PA2B1_AGKPC/sp|P51972|PA2B1_AGKPI/sp|Q91506|PA2A1_PROMU/sp|P00625|PA2A1_OVOOK/sp|P18998|PA2HA_CROSS/sp|F8QN50|PA2HS_VIPRE/sp|C0HLF0|PA2_POROP/sp|Q6H3C8|PA2AF_TRIST/sp|P17935|PA2HL_VIPAA/sp|O42188|PA2H_GLOHA/sp|Q2YHJ3|PA2A_TRIBO/sp|P14424|PA2BB_VIPAA/sp|C0HK16|PA2BD_DABRR/sp|Q02517…	90,K,D/90,R,D/90,R,D/90,R,D/90,R,D/90,R,D/90,R,D/89,R,D/106,L,D/106,K,D/106,R,E/89,K,D/106,K,D/106,R,E/90,K,D/106,R,D/106,R,K/90,K,Q/106,K,D/105,R,D/106,K,D/106,K,Q/106,K,D/90,R,D/106,K,E/106,K,E/106,R,K/106,K,D/90,K,R/90,K,D/90,K,D/90,R,E/90,R,D/106,R,D/106,K,D/105,R,D/106,R,K/106,R,K/106,R,D/106,K,D/106,K,D/106,K,N/106,K,D/106,R,D/106,K,D/106,K,D/106,K,D/90,K,D/90,R,D/106,K,D/90,K,Q/106,K,D/90,…	0	PLA2(IIA)-Aze2 [Azemiops feae]	Azemiops feae	25.7	25.7	1	1.1	1	151	ABU68548.1
			VSeo_30c31d.192.192.2 File:"VSeo_30c31d.raw", NativeID:"controllerType=0 controllerNumber=1 scan=192"	VEGF	PFLEVHER		1026.53	2	0.069243	1026.54	-0.00585	6.38384	0.0756307	sp|P83942|TXVE_VIPAP/sp|P67863|TXVE_VIPAA/	3,R,S/27,R,S/	0	vammin-1' [Vipera ammodytes ammodytes]	Vipera ammodytes ammodytes	30.3	30.3	1	0.031	1	145	APB93447.1
			VSeo_30c31d.37.37.7 File:"VSeo_30c31d.raw", NativeID:"controllerType=0 controllerNumber=1 scan=37"	PLA2	IVAVCLIGVEGSMIEFGKMIQEETEK	5,Carbamidomethyl[C];13,Oxidation[M];	2926.42	7	0.069243	2926.46	-0.045875	1.59057	0.0799159	sp|F8QN50|PA2HS_VIPRE/	5,W,N/	1	RecName: Full=Basic phospholipase A2 homolog Vur-S49; Short=svPLA2 homolog; Flags: Precursor [Vipera renardi]	Vipera renardi	88	88	1	4e-21	1	138	F8QN50.1
			VSeo_30c31d.239.239.3 File:"VSeo_30c31d.raw", NativeID:"controllerType=0 controllerNumber=1 scan=239"	VEGF	VRPFLEVHER	0,unknown[196.085 Da][111][ProteinN-term];	1392.73	3	0.069243	1392.74	-0.009739	11.6958	0.0988614	sp|P83942|TXVE_VIPAP/sp|P67863|TXVE_VIPAA/	1,Q,S/25,Q,S/	1	vammin-1' [Vipera ammodytes ammodytes]	Vipera ammodytes ammodytes	36.7	36.7	1	0.0003	1	145	APB93447.1
			VSeo_30c31d.66.66.3 File:"VSeo_30c31d.raw", NativeID:"controllerType=0 controllerNumber=1 scan=66"	VEGF	FTEHTACECRPR	7,Carbamidomethyl[C];9,Carbamidomethyl[C];	1563.67	3	0.069243	1563.68	-0.007803	4.48068	0.100601	sp|P83942|TXVE_VIPAP/sp|P67863|TXVE_VIPAA/sp|P82475|TXVE2_MACLB/	84,K,R/108,K,R/84,K,R/	1	vammin-1' [Vipera ammodytes ammodytes]	Vipera ammodytes ammodytes	44.8	44.8	1	5e-07	1	145	APB93447.1
			VSeo_30c31d.287.287.2 File:"VSeo_30c31d.raw", NativeID:"controllerType=0 controllerNumber=1 scan=287"	PLA2	EPVISYAFYGCYCGSGGR	11,Carbamidomethyl[C];13,Carbamidomethyl[C];	2042.85	2	0.069243	2042.87	-0.022792	0.001	0.101742	sp|P04417|PA2B_GLOBL/	15,K,G/	0	RecName: Full=Basic phospholipase A2; Short=PA2-I; Short=svPLA2; AltName: Full=Phosphatidylcholine 2-acylhydrolase [Gloydius blomhoffii]	Gloydius blomhoffii	62.6	62.6	1	9e-13	1	122	P04417.1
			VSeo_30c31d.218.218.2 File:"VSeo_30c31d.raw", NativeID:"controllerType=0 controllerNumber=1 scan=218"	VEGF	HTVDLQIMR		1112.58	2	0.069243	1112.59	-0.006934	2.85068	0.112124	sp|P83942|TXVE_VIPAP/sp|P67863|TXVE_VIPAA/	61,K,V/85,K,V/	0	vammin-1' [Vipera ammodytes ammodytes]	Vipera ammodytes ammodytes	34.1	34.1	1	0.002	1	145	APB93447.1
			VSeo_30c31d.162.162.2 File:"VSeo_30c31d.raw", NativeID:"controllerType=0 controllerNumber=1 scan=162"	PLA2	CCFVHSCCYAK	1,Carbamidomethyl[C];2,Carbamidomethyl[C];7,Carbamidomethyl[C];8,Carbamidomethyl[C];	1491.55	2	0.069243	1491.56	-0.008576	1.98675	0.112623	sp|F8QN50|PA2HS_VIPRE/sp|P17935|PA2HL_VIPAA/	58,R,L/58,R,L/	0	ammodytin L(2) isoform [Vipera berus berus]	Vipera berus berus	43.1	43.1	1	2e-06	1	138	CAE47248.1
			VSeo_30c31d.484.484.10 File:"VSeo_30c31d.raw", NativeID:"controllerType=0 controllerNumber=1 scan=484"	PLA2	RTLWIMAVLLLGVEGDLMQFETLIMK	0,unknown[196.085 Da][111][ProteinN-term];6,Oxidation[M];25,Oxidation[M];	3163.62	10	0.069243	3163.66	-0.038975	1.89068	0.120315	sp|A0A411EZW9|PA21_AGKPL/	1,M,I/	1	RecName: Full=Acidic phospholipase A2 AplTX-I; Short=svPLA2; AltName: Full=Phosphatidylcholine 2-acylhydrolase; Flags: Precursor [Agkistrodon piscivorus leucostoma]	Agkistrodon piscivorus leucostoma	90.6	90.6	1	5e-22	1	138	A0A411EZW9.1
			VSeo_30c31d.86.86.2 File:"VSeo_30c31d.raw", NativeID:"controllerType=0 controllerNumber=1 scan=86"	VEGF	CSGCCTDESLK	1,Carbamidomethyl[C];4,Carbamidomethyl[C];5,Carbamidomethyl[C];	1316.48	2	0.069243	1316.49	-0.010126	0.970685	0.126682	sp|P83942|TXVE_VIPAP/sp|P67863|TXVE_VIPAA/sp|P82475|TXVE2_MACLB/	44,R,C/68,R,C/44,R,C/	0	vammin-1' [Vipera ammodytes ammodytes]	Vipera ammodytes ammodytes	39.2	39.2	1	4e-05	1	145	APB93447.1
			VSeo_30c31d.203.203.2 File:"VSeo_30c31d.raw", NativeID:"controllerType=0 controllerNumber=1 scan=203"	PLA2	LGNKGKPK	3,Deamidated[N];	842.503	2	0.069243	842.509	-0.005981	2.71328	0.19419	sp|P17935|PA2HL_VIPAA/	45,G,D/	2	RecName: Full=Basic phospholipase A2 homolog ammodytin L; Short=AMDL; Short=AtnL; Short=svPLA2 homolog; Flags: Precursor [Vipera ammodytes ammodytes]	Vipera ammodytes ammodytes	26.9	26.9	1	0.53	1	138	P17935.1
			VSeo_30c31d.283.283.3 File:"VSeo_30c31d.raw", NativeID:"controllerType=0 controllerNumber=1 scan=283"	PLA2	LLGVEGSLVQFEMMIMEVAK	13,Oxidation[M];	2240.11	3	0.069243	2240.14	-0.029522	0.002	0.252689	sp|D6MKR0|PA2A6_CROHD/	10,L,R/	0	phospholipase A2 [Crotalus horridus horridus]	Crotalus horridus horridus	68.9	68.9	1	7e-15	1	138	ADD62449.1
			VSeo_30c31d.179.179.2 File:"VSeo_30c31d.raw", NativeID:"controllerType=0 controllerNumber=1 scan=179"	VEGF	HTVDLQIMR	8,Oxidation[M];	1128.58	2	0.069243	1128.58	-0.004656	3.56539	0.25554	sp|P83942|TXVE_VIPAP/sp|P67863|TXVE_VIPAA/	61,K,V/85,K,V/	0	vammin-1' [Vipera ammodytes ammodytes]	Vipera ammodytes ammodytes	34.1	34.1	1	0.002	1	145	APB93447.1
			VSeo_30c31d.149.149.2 File:"VSeo_30c31d.raw", NativeID:"controllerType=0 controllerNumber=1 scan=149"	PLA2	AFYGCYCGKGGRGK	5,Carbamidomethyl[C];7,Carbamidomethyl[C];	1580.69	2	0.069243	1580.71	-0.01645	0.001	0.274152	sp|P59264|PA2BA_PROFL/sp|P0DQP6|PA21_CERGO/sp|C0HLF0|PA2_POROP/sp|Q02517|PA2BW_PROFL/sp|Q8JIG0|PA2BQ_PROFL/sp|P06860|PA2BX_PROFL/sp|Q90Y77|PA2BY_PROFL/sp|P59265|PA2BB_PROFL/	21,Y,P/21,Y,P/21,Y,P/37,Y,P/37,Y,P/21,Y,P/37,Y,P/21,Y,P/	2	RecName: Full=Basic phospholipase A2; Short=svPLA2; AltName: Full=Myotoxin I; AltName: Full=Phosphatidylcholine 2-acylhydrolase [Cerrophidion godmani]	Cerrophidion godmani	48.6	48.6	1	2e-08	1	39	P0DQP6.1
			VSeo_30c31d.80.80.2 File:"VSeo_30c31d.raw", NativeID:"controllerType=0 controllerNumber=1 scan=80"	PLA2	VTECDPK	4,Carbamidomethyl[C];	848.379	2	0.069243	848.382	-0.00316	0.002	0.397758	sp|P82896|PA2A5_TRIST/	53,K,M/	0	RecName: Full=Acidic phospholipase A2 5; Short=svPLA2; AltName: Full=PLA2-V; AltName: Full=Phosphatidylcholine 2-acylhydrolase [Trimeresurus stejnegeri]	Trimeresurus stejnegeri	26.5	26.5	1	0.61	1	122	P82896.1
			VSeo_30c31d.55.55.2 File:"VSeo_30c31d.raw", NativeID:"controllerType=0 controllerNumber=1 scan=55"	PLA2	LSDCSPK	4,Carbamidomethyl[C];	806.37	2	0.070048	806.371	-0.001203	0.002	0.506487	sp|F8QN50|PA2HS_VIPRE/	69,K,T/	0	ammodytin L(2) isoform [Vipera berus berus]	Vipera berus berus	25.2	25.2	1	1.7	1	138	CAE47248.1
			VSeo_30d.89.89.2 File:"VSeo_30d.raw", NativeID:"controllerType=0 controllerNumber=1 scan=89"	VEGF	CSGCCTDESLK	0,Carbamidomethyl[AnyN-term];4,Carbamidomethyl[C];5,Carbamidomethyl[C];	1316.48	2	0	1316.49	-0.010248	13.2166	2.94883e-06	sp|P83942|TXVE_VIPAP/sp|P67863|TXVE_VIPAA/sp|P82475|TXVE2_MACLB/	44,R,C/68,R,C/44,R,C/	0	vammin-1' [Vipera ammodytes ammodytes]	Vipera ammodytes ammodytes	39.2	39.2	1	4e-05	1	145	APB93447.1
			VSeo_30d.238.238.3 File:"VSeo_30d.raw", NativeID:"controllerType=0 controllerNumber=1 scan=238"	VEGF	VRPFLEVHER	0,unknown[196.085 Da][111][ProteinN-term];	1392.73	3	0	1392.74	-0.008458	12.8921	5.58765e-05	sp|P83942|TXVE_VIPAP/sp|P67863|TXVE_VIPAA/	1,Q,S/25,Q,S/	1	vammin-1' [Vipera ammodytes ammodytes]	Vipera ammodytes ammodytes	36.7	36.7	1	0.0003	1	145	APB93447.1
			VSeo_30d.70.70.3 File:"VSeo_30d.raw", NativeID:"controllerType=0 controllerNumber=1 scan=70"	VEGF	FTEHTACECRPR	9,GG[C](Dicarbamidomethyl[C]);	1563.67	3	0	1563.68	-0.00945	6.16636	0.000120678	sp|P83942|TXVE_VIPAP/sp|P67863|TXVE_VIPAA/sp|P82475|TXVE2_MACLB/	84,K,R/108,K,R/84,K,R/	1	vammin-1' [Vipera ammodytes ammodytes]	Vipera ammodytes ammodytes	44.8	44.8	1	5e-07	1	145	APB93447.1
			VSeo_30d.185.185.2 File:"VSeo_30d.raw", NativeID:"controllerType=0 controllerNumber=1 scan=185"	VEGF	PSCVAVLR	0,Carbamidomethyl[AnyN-term];	901.489	2	0	901.492	-0.003845	8.06249	0.000185124	sp|C0K3N1|TXVE_BITAR/sp|P67861|TXVE_DABRR/sp|P83942|TXVE_VIPAP/sp|P0DL42|TXVE_DABSI/sp|P67863|TXVE_VIPAA/sp|P82475|TXVE2_MACLB/	60,R,C/60,R,C/36,R,C/36,R,C/60,R,C/36,R,C/	0	RecName: Full=Snake venom vascular endothelial growth factor toxin barietin; Short=svVEGF; AltName: Full=VEGF-F; Flags: Precursor [Bitis arietans]	Bitis arietans	28.2	28.2	1	0.18	1	150	C0K3N1.1
			VSeo_30d.194.194.2 File:"VSeo_30d.raw", NativeID:"controllerType=0 controllerNumber=1 scan=194"	VEGF	PFLEVHER		1026.53	2	0	1026.54	-0.008535	11.7862	0.00289691	sp|P83942|TXVE_VIPAP/sp|P67863|TXVE_VIPAA/	3,R,S/27,R,S/	0	vammin-1' [Vipera ammodytes ammodytes]	Vipera ammodytes ammodytes	30.3	30.3	1	0.031	1	145	APB93447.1
			VSeo_30d.181.181.2 File:"VSeo_30d.raw", NativeID:"controllerType=0 controllerNumber=1 scan=181"	VEGF	HTVDLQIMR	8,Oxidation[M];	1128.58	2	0	1128.58	-0.007098	11.9369	0.00306203	sp|P83942|TXVE_VIPAP/sp|P67863|TXVE_VIPAA/	61,K,V/85,K,V/	0	vammin-1' [Vipera ammodytes ammodytes]	Vipera ammodytes ammodytes	34.1	34.1	1	0.002	1	145	APB93447.1
			VSeo_30d.196.196.3 File:"VSeo_30d.raw", NativeID:"controllerType=0 controllerNumber=1 scan=196"	VEGF	LEVHER	0,unknown[244.101 Da][AnyN-term];	1026.53	3	0	1026.52	0.016234	5.50958	0.00675342	sp|P83942|TXVE_VIPAP/sp|P67863|TXVE_VIPAA/	5,F,S/29,F,S/	0	vammin-1' [Vipera ammodytes ammodytes]	Vipera ammodytes ammodytes	23.1	23.1	1	7.2	1	145	APB93447.1
			VSeo_30d.242.242.2 File:"VSeo_30d.raw", NativeID:"controllerType=0 controllerNumber=1 scan=242"	VEGF	QVRPFLEVHER	0,Gln->pyro-Glu[AnyN-termQ];	1392.73	2	0	1392.74	-0.010972	8.69406	0.0206843	sp|P83942|TXVE_VIPAP/sp|P67863|TXVE_VIPAA/	0,-,S/24,G,S/	1	vammin-1' [Vipera ammodytes ammodytes]	Vipera ammodytes ammodytes	40.1	40.1	1	2e-05	1	145	APB93447.1
			VSeo_30d.236.236.3 File:"VSeo_30d.raw", NativeID:"controllerType=0 controllerNumber=1 scan=236"	VEGF	EVRPFLDVYQR	0,Acetyl[ProteinN-term];3,Dicarbamidomethyl[R];	1577.81	3	0	1577.81	0.005656	0.952291	0.020761	sp|P0DL42|TXVE_DABSI/	0,-,S/	1	RecName: Full=Snake venom vascular endothelial growth factor toxin VR-1'; Short=svVEGF; AltName: Full=VEGF-F [Daboia siamensis]	Daboia siamensis	40.5	40.5	1	2e-05	1	109	P0DL42.1
			VSeo_30d.232.232.3 File:"VSeo_30d.raw", NativeID:"controllerType=0 controllerNumber=1 scan=232"	VEGF	PFLEVHER	0,Acetyl[ProteinN-term];	1068.54	3	0	1068.55	-0.003061	2.92806	0.136263	sp|P83942|TXVE_VIPAP/sp|P67863|TXVE_VIPAA/	3,R,S/27,R,S/	0	vammin-1' [Vipera ammodytes ammodytes]	Vipera ammodytes ammodytes	30.3	30.3	1	0.031	1	145	APB93447.1
			VSeo_30d.214.214.3 File:"VSeo_30d.raw", NativeID:"controllerType=0 controllerNumber=1 scan=214"	VEGF	PFLDVYER		1038.54	3	0	1038.53	0.009581	0.972195	0.165292	sp|P67861|TXVE_DABRR/	27,R,S/	0	RecName: Full=Snake venom vascular endothelial growth factor toxin VR-1; Short=svVEGF; AltName: Full=VEGF-F; Flags: Precursor [Daboia russelii]	Daboia russelii	30.8	30.8	1	0.023	1	144	P67861.2
			VSeo_30d.53.53.2 File:"VSeo_30d.raw", NativeID:"controllerType=0 controllerNumber=1 scan=53"	VEGF	CTPVGK	1,Carbamidomethyl[C];	661.334	2	0	661.334	0.000654	1.74409	0.297462	sp|P67861|TXVE_DABRR/sp|P83942|TXVE_VIPAP/sp|P0DL42|TXVE_DABSI/sp|P67863|TXVE_VIPAA/sp|P82475|TXVE2_MACLB/	79,K,H/55,K,H/55,K,H/79,K,H/55,K,H/	0	vammin-1' [Vipera ammodytes ammodytes]	Vipera ammodytes ammodytes	22.3	22.3	1	14	1	145	APB93447.1
			VSeo_30d.65.65.2 File:"VSeo_30d.raw", NativeID:"controllerType=0 controllerNumber=1 scan=65"	VEGF	QGEPEGPK		841.397	2	0	841.405	-0.007598	0.003	0.316855	sp|P67861|TXVE_DABRR/sp|P0DL42|TXVE_DABSI/	122,K,E/98,K,E/	0	RecName: Full=Snake venom vascular endothelial growth factor toxin VR-1; Short=svVEGF; AltName: Full=VEGF-F; Flags: Precursor [Daboia russelii]	Daboia russelii	28.2	28.2	1	0.19	1	144	P67861.2
			VSeo_30e.524.524.6 File:"VSeo_30e.raw", NativeID:"controllerType=0 controllerNumber=1 scan=524"	VEGF	CSGCCTDESLKCTPVGKHTVDLQIMRVNPR	0,Acetyl[ProteinN-term];25,Oxidation[M];28,Deamidated[N];	3349.56	6	0	3349.55	0.008988	0.007545	0.00594933	sp|P83942|TXVE_VIPAP/sp|P67863|TXVE_VIPAA/	44,R,T/68,R,T/	3	RecName: Full=Snake venom vascular endothelial growth factor toxin HF; Short=svVEGF; AltName: Full=Heparin-binding dimeric hypotensive factor; AltName: Full=VEGF-F [Vipera aspis aspis]	Vipera aspis aspis	102	102	1	5e-26	1	110	P83942.1
			VSeo_30e.87.87.2 File:"VSeo_30e.raw", NativeID:"controllerType=0 controllerNumber=1 scan=87"	VEGF	CGGCCTDESLK	0,glycidamide[AnyN-term];4,Carbamidomethyl[C];5,Carbamidomethyl[C];	1316.48	2	0	1316.49	-0.008418	8.61705	0.00618994	sp|Q90X24|TXVE_BOTIN/	68,R,C/	0	RecName: Full=Snake venom vascular endothelial growth factor toxin; Short=svVEGF; AltName: Full=VEGF-F; Flags: Precursor [Bothrops insularis]	Bothrops insularis	39.2	39.2	1	4e-05	1	146	Q90X24.1
			VSeo_30e.180.180.2 File:"VSeo_30e.raw", NativeID:"controllerType=0 controllerNumber=1 scan=180"	VEGF	HTVDLQIMR	8,Oxidation[M];	1128.57	2	0	1128.58	-0.008074	10.9288	0.0458354	sp|P83942|TXVE_VIPAP/sp|P67863|TXVE_VIPAA/	61,K,V/85,K,V/	0	vammin-1' [Vipera ammodytes ammodytes]	Vipera ammodytes ammodytes	34.1	34.1	1	0.002	1	145	APB93447.1
			VSeo_30e.192.192.3 File:"VSeo_30e.raw", NativeID:"controllerType=0 controllerNumber=1 scan=192"	VEGF	PFLEVHER		1026.53	3	0	1026.54	-0.00394	9.56903	0.0566631	sp|P83942|TXVE_VIPAP/sp|P67863|TXVE_VIPAA/	3,R,S/27,R,S/	0	vammin-1' [Vipera ammodytes ammodytes]	Vipera ammodytes ammodytes	30.3	30.3	1	0.031	1	145	APB93447.1
			VSeo_30e.238.238.2 File:"VSeo_30e.raw", NativeID:"controllerType=0 controllerNumber=1 scan=238"	VEGF	QVRPFLEVHER	0,Gln->pyro-Glu[AnyN-termQ];	1392.73	2	0	1392.74	-0.010728	12.5318	0.0642991	sp|P83942|TXVE_VIPAP/sp|P67863|TXVE_VIPAA/	0,-,S/24,G,S/	1	vammin-1' [Vipera ammodytes ammodytes]	Vipera ammodytes ammodytes	40.1	40.1	1	2e-05	1	145	APB93447.1
			VSeo_30e.216.216.2 File:"VSeo_30e.raw", NativeID:"controllerType=0 controllerNumber=1 scan=216"	VEGF	HTVDLQIMR		1112.58	2	0	1112.59	-0.0073	5.5754	0.108006	sp|P83942|TXVE_VIPAP/sp|P67863|TXVE_VIPAA/	61,K,V/85,K,V/	0	vammin-1' [Vipera ammodytes ammodytes]	Vipera ammodytes ammodytes	34.1	34.1	1	0.002	1	145	APB93447.1
			VSeo_30e.90.90.2 File:"VSeo_30e.raw", NativeID:"controllerType=0 controllerNumber=1 scan=90"	VEGF	CSGCCTDESLK	1,Carbamidomethyl[C];4,Carbamidomethyl[C];5,Carbamidomethyl[C];	1316.48	2	0	1316.49	-0.009272	4.4251	0.192607	sp|P83942|TXVE_VIPAP/sp|P67863|TXVE_VIPAA/sp|P82475|TXVE2_MACLB/	44,R,C/68,R,C/44,R,C/	0	vammin-1' [Vipera ammodytes ammodytes]	Vipera ammodytes ammodytes	39.2	39.2	1	4e-05	1	145	APB93447.1
			VSeo_30e.186.186.2 File:"VSeo_30e.raw", NativeID:"controllerType=0 controllerNumber=1 scan=186"	VEGF	PSCVAVLR	3,Carbamidomethyl[C];	901.488	2	0	901.492	-0.004821	4.80872	0.201335	sp|C0K3N1|TXVE_BITAR/sp|P67861|TXVE_DABRR/sp|P83942|TXVE_VIPAP/sp|P0DL42|TXVE_DABSI/sp|P67863|TXVE_VIPAA/sp|P82475|TXVE2_MACLB/	60,R,C/60,R,C/36,R,C/36,R,C/60,R,C/36,R,C/	0	RecName: Full=Snake venom vascular endothelial growth factor toxin barietin; Short=svVEGF; AltName: Full=VEGF-F; Flags: Precursor [Bitis arietans]	Bitis arietans	28.2	28.2	1	0.18	1	150	C0K3N1.1
			VSeo_30e.72.72.3 File:"VSeo_30e.raw", NativeID:"controllerType=0 controllerNumber=1 scan=72"	VEGF	FTEHTACECRPR	7,Carbamidomethyl[C];9,Carbamidomethyl[C];	1563.67	3	0	1563.68	-0.005972	5.56827	0.224851	sp|P83942|TXVE_VIPAP/sp|P67863|TXVE_VIPAA/sp|P82475|TXVE2_MACLB/	84,K,R/108,K,R/84,K,R/	1	vammin-1' [Vipera ammodytes ammodytes]	Vipera ammodytes ammodytes	44.8	44.8	1	5e-07	1	145	APB93447.1
			VSeo_30e.48.48.2 File:"VSeo_30e.raw", NativeID:"controllerType=0 controllerNumber=1 scan=48"	VEGF	CTPVGK	1,Carbamidomethyl[C];	661.333	2	0	661.334	-0.000566	1.93674	0.419045	sp|P67861|TXVE_DABRR/sp|P83942|TXVE_VIPAP/sp|P0DL42|TXVE_DABSI/sp|P67863|TXVE_VIPAA/sp|P82475|TXVE2_MACLB/	79,K,H/55,K,H/55,K,H/79,K,H/55,K,H/	0	vammin-1' [Vipera ammodytes ammodytes]	Vipera ammodytes ammodytes	22.3	22.3	1	14	1	145	APB93447.1
			VSeo_31b (man 49c.244)	svMP	LFCEILPNTRC	3,Carbamidomethyl[C];11,unknown[28.990 Da][C];	1394.64	2	0	1394.66	-0.01747	5.95099	0.00408167	sp|C0LZJ5|VM3LC_MACLN/	160,R,K/	1	RecName: Full=Disintegrin-like leberagin-C [Macrovipera lebetina transmediterranea]	Macrovipera lebetina transmediterranea	41.4	41.4	1	7e-06	1	205	C0LZJ5.1
			VSeo_31c.254.254.2 File:"VSeo_31c.raw", NativeID:"controllerType=0 controllerNumber=1 scan=254"	svMP	LFCEILP	3,Carbamidomethyl[C];7,Pro->Lys[P];	922.503	2	0	922.507	-0.004003	7.99286	0.5	sp|C0LZJ5|VM3LC_MACLN/	160,R,N/	0	metalloproteinase of class P-III MPIII-1 [Vipera ammodytes ammodytes]	Vipera ammodytes ammodytes	27.4	27.4	1	0.27	1	607	AMB36352.1
			VSeo_31e.236.236.3 File:"VSeo_31e.raw", NativeID:"controllerType=0 controllerNumber=1 scan=236"	VEGF	VRPFLEVHER	0,unknown[196.085 Da][111][ProteinN-term];	1392.73	3	0	1392.74	-0.008732	12.5729	6.03693e-07	sp|P83942|TXVE_VIPAP/sp|P67863|TXVE_VIPAA/	1,Q,S/25,Q,S/	1	vammin-1' [Vipera ammodytes ammodytes]	Vipera ammodytes ammodytes	36.7	36.7	1	0.0003	1	145	APB93447.1
			VSeo_31e.192.192.2 File:"VSeo_31e.raw", NativeID:"controllerType=0 controllerNumber=1 scan=192"	VEGF	PFLEVHER		1026.53	2	0	1026.54	-0.008291	11.4925	2.15439e-06	sp|P83942|TXVE_VIPAP/sp|P67863|TXVE_VIPAA/	3,R,S/27,R,S/	0	vammin-1' [Vipera ammodytes ammodytes]	Vipera ammodytes ammodytes	30.3	30.3	1	0.031	1	145	APB93447.1
			VSeo_31e.86.86.2 File:"VSeo_31e.raw", NativeID:"controllerType=0 controllerNumber=1 scan=86"	VEGF	CSGCCTDESLK	1,Carbamidomethyl[C];4,Carbamidomethyl[C];5,Carbamidomethyl[C];	1316.48	2	0	1316.49	-0.010126	10.8536	2.2269e-06	sp|P83942|TXVE_VIPAP/sp|P67863|TXVE_VIPAA/sp|P82475|TXVE2_MACLB/	44,R,C/68,R,C/44,R,C/	0	vammin-1' [Vipera ammodytes ammodytes]	Vipera ammodytes ammodytes	39.2	39.2	1	4e-05	1	145	APB93447.1
			VSeo_31e.185.185.2 File:"VSeo_31e.raw", NativeID:"controllerType=0 controllerNumber=1 scan=185"	VEGF	PSCVAVLR	3,Carbamidomethyl[C];	901.487	2	0	901.492	-0.005798	10.7941	2.37954e-06	sp|C0K3N1|TXVE_BITAR/sp|P67861|TXVE_DABRR/sp|P83942|TXVE_VIPAP/sp|P0DL42|TXVE_DABSI/sp|P67863|TXVE_VIPAA/sp|P82475|TXVE2_MACLB/	60,R,C/60,R,C/36,R,C/36,R,C/60,R,C/36,R,C/	0	RecName: Full=Snake venom vascular endothelial growth factor toxin barietin; Short=svVEGF; AltName: Full=VEGF-F; Flags: Precursor [Bitis arietans]	Bitis arietans	28.2	28.2	1	0.18	1	150	C0K3N1.1
			VSeo_31e.218.218.2 File:"VSeo_31e.raw", NativeID:"controllerType=0 controllerNumber=1 scan=218"	VEGF	HTVDLQIMR		1112.58	2	0	1112.59	-0.005835	6.42236	1.92265e-05	sp|P83942|TXVE_VIPAP/sp|P67863|TXVE_VIPAA/	61,K,V/85,K,V/	0	vammin-1' [Vipera ammodytes ammodytes]	Vipera ammodytes ammodytes	34.1	34.1	1	0.002	1	145	APB93447.1
			VSeo_31e.179.179.2 File:"VSeo_31e.raw", NativeID:"controllerType=0 controllerNumber=1 scan=179"	VEGF	HTVDLQIMR	8,Oxidation[M];	1128.57	2	0	1128.58	-0.008196	9.56184	1.97606e-05	sp|P83942|TXVE_VIPAP/sp|P67863|TXVE_VIPAA/	61,K,V/85,K,V/	0	vammin-1' [Vipera ammodytes ammodytes]	Vipera ammodytes ammodytes	34.1	34.1	1	0.002	1	145	APB93447.1
			VSeo_31e.65.65.3 File:"VSeo_31e.raw", NativeID:"controllerType=0 controllerNumber=1 scan=65"	VEGF	FTEHTACECRPR	7,Carbamidomethyl[C];9,Carbamidomethyl[C];	1563.67	3	0	1563.68	-0.007986	6.75438	0.000129918	sp|P83942|TXVE_VIPAP/sp|P67863|TXVE_VIPAA/sp|P82475|TXVE2_MACLB/	84,K,R/108,K,R/84,K,R/	1	vammin-1' [Vipera ammodytes ammodytes]	Vipera ammodytes ammodytes	44.8	44.8	1	5e-07	1	145	APB93447.1
			VSeo_31e.540.540.11 File:"VSeo_31e.raw", NativeID:"controllerType=0 controllerNumber=1 scan=540"	VEGF	AAYLLAVAILFCIQGWPSGTVQGEVRPFMEVYQRSVCQPRETLVSILEEYPDK	0,unknown[196.085 Da][111][ProteinN-term];12,Carbamidomethyl[C];26,Arg->Asn[R];34,Arg->Asn[R];37,Carbamidomethyl[C];	6140.98	11	0	6141.01	-0.028291	0.927784	0.157751	sp|C0K3N1|TXVE_BITAR/	1,M,I/	3	RecName: Full=Snake venom vascular endothelial growth factor toxin barietin; Short=svVEGF; AltName: Full=VEGF-F; Flags: Precursor [Bitis arietans]	Bitis arietans	112	112	1	5e-33	1	150	C0K3N1.1
			VSeo_31e.50.50.2 File:"VSeo_31e.raw", NativeID:"controllerType=0 controllerNumber=1 scan=50"	VEGF	CTPVGK	1,Carbamidomethyl[C];	661.334	2	0	661.334	0.000166	2.75478	0.184317	sp|P67861|TXVE_DABRR/sp|P83942|TXVE_VIPAP/sp|P0DL42|TXVE_DABSI/sp|P67863|TXVE_VIPAA/sp|P82475|TXVE2_MACLB/	79,K,H/55,K,H/55,K,H/79,K,H/55,K,H/	0	vammin-1' [Vipera ammodytes ammodytes]	Vipera ammodytes ammodytes	22.3	22.3	1	14	1	145	APB93447.1
			VSeo_31e.48.48.2 File:"VSeo_31e.raw", NativeID:"controllerType=0 controllerNumber=1 scan=48"	VEGF	QGEPDGPK		827.388	2	0	827.389	-0.000983	2.75131	0.213009	sp|P83942|TXVE_VIPAP/sp|P67863|TXVE_VIPAA/sp|P82475|TXVE2_MACLB/	98,K,E/122,K,E/98,K,E/	0	vammin-1' [Vipera ammodytes ammodytes]	Vipera ammodytes ammodytes	28.2	28.2	1	0.18	1	145	APB93447.1
			VSeo_31e.161.161.2 File:"VSeo_31e.raw", NativeID:"controllerType=0 controllerNumber=1 scan=161"	VEGF	CVAVLR	1,Carbamidomethyl[C];	717.405	2	0	717.408	-0.002496	1.90325	0.236915	sp|C0K3N1|TXVE_BITAR/sp|P67861|TXVE_DABRR/sp|P83942|TXVE_VIPAP/sp|P0DL42|TXVE_DABSI/sp|P67863|TXVE_VIPAA/sp|P82475|TXVE2_MACLB/	62,S,C/62,S,C/38,S,C/38,S,C/62,S,C/38,S,C/	0	RecName: Full=Snake venom vascular endothelial growth factor toxin barietin; Short=svVEGF; AltName: Full=VEGF-F; Flags: Precursor [Bitis arietans]	Bitis arietans	22.3	22.3	1	14	1	150	C0K3N1.1
			VSeo_31e.204.204.3 File:"VSeo_31e.raw", NativeID:"controllerType=0 controllerNumber=1 scan=204"	VEGF	PFLDVYER	0,Carbamidomethyl[AnyN-term];	1095.56	3	0	1095.55	0.010089	1.1819	0.263833	sp|P67861|TXVE_DABRR/	27,R,S/	0	RecName: Full=Snake venom vascular endothelial growth factor toxin VR-1; Short=svVEGF; AltName: Full=VEGF-F; Flags: Precursor [Daboia russelii]	Daboia russelii	30.8	30.8	1	0.023	1	144	P67861.2
			VSeo_31e.477.477.15 File:"VSeo_31e.raw", NativeID:"controllerType=0 controllerNumber=1 scan=477"	VEGF	ILQEYPDEISDIFRPSCVAVLRCSGCCTDESLKCTPVGK	0,Acetyl[ProteinN-term];17,Carbamidomethyl[C];22,Arg->Asn[R];23,Carbamidomethyl[C];26,Carbamidomethyl[C];27,Carbamidomethyl[C];	4503.02	15	0	4503.06	-0.043526	0.935558	0.389498	sp|P83942|TXVE_VIPAP/sp|P67863|TXVE_VIPAA/sp|P82475|TXVE2_MACLB/	22,S,H/46,P,H/22,S,H/	3	RecName: Full=Snake venom vascular endothelial growth factor toxin HF; Short=svVEGF; AltName: Full=Heparin-binding dimeric hypotensive factor; AltName: Full=VEGF-F [Vipera aspis aspis]	Vipera aspis aspis	83.2	83.2	1	4e-22	1	110	P83942.1
			VSeo_31e.251.251.3 File:"VSeo_31e.raw", NativeID:"controllerType=0 controllerNumber=1 scan=251"	VEGF	CTPVGKHTVDMQIMR	0,unknown[196.085 Da][111][ProteinN-term];11,Oxidation[M];	1842.9	3	0	1842.87	0.02952	0.589685	0.400937	sp|P82475|TXVE2_MACLB/	55,K,V/	1	RecName: Full=Snake venom vascular endothelial growth factor toxin ICPP; Short=svVEGF; AltName: Full=Increasing capillary permeability protein; AltName: Full=Increasing capillary-2; Short=IC2; AltName: Full=VEGF-F [Macrovipera lebetina]	Macrovipera lebetina	35.8	35.8	1	0.0005	1	110	P82475.2
			VSeo_31f.288.288.2 File:"VSeo_31f.raw", NativeID:"controllerType=0 controllerNumber=1 scan=288"	PLA2	SALLSYSNYGCYCGWGGK	11,Carbamidomethyl[C];13,Carbamidomethyl[C];	2042.86	2	0	2042.87	-0.012416	12.3134	0.000162734	sp|P34180|PA2N2_VIPAA/	31,K,G/	0	ammodytin I2(A) isoform [Vipera aspis aspis]	Vipera aspis aspis	62.6	62.6	1	7e-13	1	68	CAE47206.1
			VSeo_31f.276.276.2 File:"VSeo_31f.raw", NativeID:"controllerType=0 controllerNumber=1 scan=276"	PLA2	VAAICFGENLNTYDK	5,Carbamidomethyl[C];	1714.8	2	0	1714.81	-0.014355	14.6813	0.000624409	sp|P34180|PA2N2_VIPAA/sp|F8QN53|PA2A2_VIPRE/	106,R,K/106,R,K/	0	ammodytin I2(A'') isoform [Vipera aspis aspis]	Vipera aspis aspis	52	52	1	3e-09	1	137	CAE47205.1
			VSeo_31f.171.171.3 File:"VSeo_31f.raw", NativeID:"controllerType=0 controllerNumber=1 scan=171"	PLA2	CCFVHDCCYGR	1,Carbamidomethyl[C];2,Carbamidomethyl[C];7,Carbamidomethyl[C];8,Carbamidomethyl[C];	1533.54	3	0	1533.55	-0.005352	11.9949	0.00188807	sp|A8CG87|PA2A2_DABRR/sp|P14421|PA2N_GLOHA/sp|P21789|PA2A_CERCE/sp|Q1RP79|PA2B1_VIPBN/sp|P24294|PA2A2_ERIMA/sp|P14420|PA2B_VIPAE/sp|Q10755|PA2B_VIPAZ/sp|P31854|PA2B_VIPBB/sp|P0DKR3|PA2AA_PSEFE/sp|F8QN51|PA2A3_VIPRE/sp|P34180|PA2N2_VIPAA/sp|P0DPS4|PA2B_CERCE/sp|Q8JFG0|PA2B_VIPAP/sp|Q1RP78|PA2B2_VIPBN/sp|F8QN52|PA2A1_VIPRE/sp|A8CG78|PA2A2_DABSI/sp|Q910A0|PA23_ECHCO/sp|F8QN53|PA2A2_VIPRE/sp|P24293|P…	58,R,V/42,R,L/42,R,V/58,R,V/42,R,V/42,R,V/42,R,V/58,R,A/42,R,V/58,R,V/58,R,V/42,R,A/58,R,V/58,R,V/58,R,V/58,R,V/58,R,V/58,R,V/42,R,V/42,R,V/58,R,V/	0	PLA2(IIA)-Aze2 [Azemiops feae]	Azemiops feae	44.3	44.3	1	6e-07	1	151	ABU68548.1
			VSeo_31f.252.252.3 File:"VSeo_31f.raw", NativeID:"controllerType=0 controllerNumber=1 scan=252"	PLA2	VAAICFGENLNTYDKK	5,Carbamidomethyl[C];	1842.9	3	0	1842.91	-0.01002	8.20037	0.00463672	sp|P34180|PA2N2_VIPAA/sp|F8QN53|PA2A2_VIPRE/	106,R,Y/106,R,Y/	1	RecName: Full=Acidic phospholipase A2 Vur-PL2B; Short=Vur-PL2; Short=svPLA2; AltName: Full=Phosphatidylcholine 2-acylhydrolase; Flags: Precursor [Vipera renardi]	Vipera renardi	36.2	36.2	1	0.0004	1	137	F8QN53.1
			VSeo_31f.193.193.2 File:"VSeo_31f.raw", NativeID:"controllerType=0 controllerNumber=1 scan=193"	VEGF	PFLEVHER		1026.53	2	0	1026.54	-0.005117	11.2377	0.00708806	sp|P83942|TXVE_VIPAP/sp|P67863|TXVE_VIPAA/	3,R,S/27,R,S/	0	vammin-1' [Vipera ammodytes ammodytes]	Vipera ammodytes ammodytes	30.3	30.3	1	0.031	1	145	APB93447.1
			VSeo_31f.66.66.3 File:"VSeo_31f.raw", NativeID:"controllerType=0 controllerNumber=1 scan=66"	VEGF	FTEHTACECRPR	7,Carbamidomethyl[C];9,Carbamidomethyl[C];	1563.67	3	0	1563.68	-0.004873	7.99055	0.00850146	sp|P83942|TXVE_VIPAP/sp|P67863|TXVE_VIPAA/sp|P82475|TXVE2_MACLB/	84,K,R/108,K,R/84,K,R/	1	vammin-1' [Vipera ammodytes ammodytes]	Vipera ammodytes ammodytes	44.8	44.8	1	5e-07	1	145	APB93447.1
			VSeo_31f.237.237.3 File:"VSeo_31f.raw", NativeID:"controllerType=0 controllerNumber=1 scan=237"	VEGF	QVRPFLEVHER	0,Gln->pyro-Glu[AnyN-termQ];	1392.73	3	0	1392.74	-0.008087	13.6625	0.0102184	sp|P83942|TXVE_VIPAP/sp|P67863|TXVE_VIPAA/	0,-,S/24,G,S/	1	vammin-1' [Vipera ammodytes ammodytes]	Vipera ammodytes ammodytes	40.1	40.1	1	2e-05	1	145	APB93447.1
			VSeo_31f.318.318.2 File:"VSeo_31f.raw", NativeID:"controllerType=0 controllerNumber=1 scan=318"	PLA2	LSIYSYSFENGDIVCGGDDPCLR	15,Carbamidomethyl[C];21,Carbamidomethyl[C];	2637.14	2	0	2637.16	-0.017819	1.93622	0.0102461	sp|P34180|PA2N2_VIPAA/	76,K,A/	0	ammodytin I2(B) variant [Vipera aspis atra]	Vipera aspis atra	78.7	78.7	1	4e-18	1	137	CAE47230.1
			VSeo_31f.339.339.2 File:"VSeo_31f.raw", NativeID:"controllerType=0 controllerNumber=1 scan=339"	PLA2	NLYQFGNMIFK		1374.68	2	0	1374.69	-0.008039	12.3813	0.0203583	sp|P34180|PA2N2_VIPAA/	16,G,M/	0	ammodytin I2(B) variant [Vipera aspis atra]	Vipera aspis atra	41.8	41.8	1	5e-06	1	137	CAE47230.1
			VSeo_31f.186.186.2 File:"VSeo_31f.raw", NativeID:"controllerType=0 controllerNumber=1 scan=186"	VEGF	PSCVAVLR	3,Carbamidomethyl[C];	901.488	2	0	901.492	-0.004577	7.025	0.0210195	sp|C0K3N1|TXVE_BITAR/sp|P67861|TXVE_DABRR/sp|P83942|TXVE_VIPAP/sp|P0DL42|TXVE_DABSI/sp|P67863|TXVE_VIPAA/sp|P82475|TXVE2_MACLB/	60,R,C/60,R,C/36,R,C/36,R,C/60,R,C/36,R,C/	0	RecName: Full=Snake venom vascular endothelial growth factor toxin barietin; Short=svVEGF; AltName: Full=VEGF-F; Flags: Precursor [Bitis arietans]	Bitis arietans	28.2	28.2	1	0.18	1	150	C0K3N1.1
			VSeo_31f.181.181.2 File:"VSeo_31f.raw", NativeID:"controllerType=0 controllerNumber=1 scan=181"	VEGF	HTVDLQIMR	8,Oxidation[M];	1128.58	2	0	1128.58	-0.007342	7.813	0.0213921	sp|P83942|TXVE_VIPAP/sp|P67863|TXVE_VIPAA/	61,K,V/85,K,V/	0	vammin-1' [Vipera ammodytes ammodytes]	Vipera ammodytes ammodytes	34.1	34.1	1	0.002	1	145	APB93447.1
			VSeo_31f.222.222.2 File:"VSeo_31f.raw", NativeID:"controllerType=0 controllerNumber=1 scan=222"	VEGF	HTVDLQIMR		1112.58	2	0	1112.59	-0.005713	5.50725	0.0287078	sp|P83942|TXVE_VIPAP/sp|P67863|TXVE_VIPAA/	61,K,V/85,K,V/	0	vammin-1' [Vipera ammodytes ammodytes]	Vipera ammodytes ammodytes	34.1	34.1	1	0.002	1	145	APB93447.1
			VSeo_31f.321.321.2 File:"VSeo_31f.raw", NativeID:"controllerType=0 controllerNumber=1 scan=321"	PLA2	LSIYSYSFENGDIVCGGDDPCLR	10,Deamidated[N];15,Carbamidomethyl[C];21,Carbamidomethyl[C];	2638.13	2	0	2638.14	-0.015751	5.44973	0.0299041	sp|P34180|PA2N2_VIPAA/	76,K,A/	0	ammodytin I2(B) variant [Vipera aspis atra]	Vipera aspis atra	78.7	78.7	1	4e-18	1	137	CAE47230.1
			VSeo_31f.312.312.2 File:"VSeo_31f.raw", NativeID:"controllerType=0 controllerNumber=1 scan=312"	PLA2	NLYQFGNMIFK	8,Oxidation[M];	1390.67	2	0	1390.68	-0.009668	8.76746	0.0348271	sp|P34180|PA2N2_VIPAA/	16,G,M/	0	ammodytin I2(B) variant [Vipera aspis atra]	Vipera aspis atra	41.8	41.8	1	5e-06	1	137	CAE47230.1
			VSeo_31f.103.103.2 File:"VSeo_31f.raw", NativeID:"controllerType=0 controllerNumber=1 scan=103"	PLA2	NYPSSHCTETEQC	7,Carbamidomethyl[C];13,Carbamidomethyl[C];	1612.59	2	0	1612.6	-0.009681	2.88178	0.039121	sp|P34180|PA2N2_VIPAA/	124,K,-/	0	ammodytin I2(B) variant [Vipera aspis atra]	Vipera aspis atra	47.7	47.7	1	6e-08	1	137	CAE47230.1
			VSeo_31f.87.87.2 File:"VSeo_31f.raw", NativeID:"controllerType=0 controllerNumber=1 scan=87"	VEGF	CSGCCTDESLK	1,Carbamidomethyl[C];4,Carbamidomethyl[C];5,Carbamidomethyl[C];	1316.48	2	0	1316.49	-0.00976	3.72072	0.0634215	sp|P83942|TXVE_VIPAP/sp|P67863|TXVE_VIPAA/sp|P82475|TXVE2_MACLB/	44,R,C/68,R,C/44,R,C/	0	vammin-1' [Vipera ammodytes ammodytes]	Vipera ammodytes ammodytes	39.2	39.2	1	4e-05	1	145	APB93447.1
			VSeo_31f.41.41.2 File:"VSeo_31f.raw", NativeID:"controllerType=0 controllerNumber=1 scan=41"	PLA2	GKPQDATDR		987.48	2	0	987.485	-0.005202	2.49115	0.108154	sp|A8CG87|PA2A2_DABRR/sp|Q9PWR6|PA2A7_DABPA/sp|Q9YGJ7|PA2A8_DABPA/sp|C0HJC1|PA2_BOTLA/sp|B6CQR5|PA2A2_MACLB/sp|A8CG86|PA2A1_DABRR/sp|Q7T2R1|PA2AA_DABSI/sp|P31854|PA2B_VIPBB/sp|C3W4R6|PA2A1_MACLB/sp|P34180|PA2N2_VIPAA/sp|P81458|PA2B_DABRR/sp|A8CG90|PA2B2_DABRR/sp|B5U6Z2|PA2A_MACLN/sp|Q98996|PA2A_DABPA/sp|A8CG78|PA2A2_DABSI/sp|Q910A0|PA23_ECHCO/	49,K,C/49,K,C/48,K,C/33,R,C/49,K,C/49,Q,C/49,Q,C/49,Q,C/49,K,C/49,K,C/33,K,C/49,K,C/49,K,C/49,K,C/49,K,C/49,K,C/	1	acidic phospholipase A2 [Atheris nitschei]	Atheris nitschei	31.2	31.2	1	0.019	1	139	AJA90799.1
			VSeo_31f.214.214.3 File:"VSeo_31f.raw", NativeID:"controllerType=0 controllerNumber=1 scan=214"	VEGF	PFLDVYER		1038.54	3	0	1038.53	0.011961	0.747283	0.229873	sp|P67861|TXVE_DABRR/	27,R,S/	0	RecName: Full=Snake venom vascular endothelial growth factor toxin VR-1; Short=svVEGF; AltName: Full=VEGF-F; Flags: Precursor [Daboia russelii]	Daboia russelii	30.8	30.8	1	0.023	1	144	P67861.2
			VSeo_31f.47.47.2 File:"VSeo_31f.raw", NativeID:"controllerType=0 controllerNumber=1 scan=47"	VEGF	CTPVGK	1,Carbamidomethyl[C];	661.333	2	0	661.334	-0.000322	1.89067	0.255951	sp|P67861|TXVE_DABRR/sp|P83942|TXVE_VIPAP/sp|P0DL42|TXVE_DABSI/sp|P67863|TXVE_VIPAA/sp|P82475|TXVE2_MACLB/	79,K,H/55,K,H/55,K,H/79,K,H/55,K,H/	0	vammin-1' [Vipera ammodytes ammodytes]	Vipera ammodytes ammodytes	22.3	22.3	1	14	1	145	APB93447.1
			VSeo_31f.319.319.2 File:"VSeo_31f.raw", NativeID:"controllerType=0 controllerNumber=1 scan=319"	PLA2	NYKFLSSSRCR	10,Carbamidomethyl[C];	1417.69	2	0	1417.7	-0.013493	0.002	0.273023	sp|Q1RP79|PA2B1_VIPBN/sp|P14420|PA2B_VIPAE/	121,K,Q/105,K,Q/	2	RecName: Full=Basic phospholipase A2 chain HDP-1P; Short=svPLA2; AltName: Full=Heterodimeric neurotoxic phospholipases A2 basic subunit 1; AltName: Full=Phosphatidylcholine 2-acylhydrolase; Flags: Precursor [Vipera berus nikolskii]	Vipera berus nikolskii	39.2	39.2	1	4e-05	1	138	Q1RP79.1
			VSeo_31f.246.246.3 File:"VSeo_31f.raw", NativeID:"controllerType=0 controllerNumber=1 scan=246"	PLA2	GNLFQFGKMIK	0,unknown[196.085 Da][111][ProteinN-term];	1393.73	3	0.61967	1393.73	0.004832	0.002	0.998852	sp|F8QN51|PA2A3_VIPRE/sp|P0CAS0|PA2A2_CERCE/	15,E,Y/15,E,H/	1	RecName: Full=Acidic phospholipase A2 Vur-PL3; Short=svPLA2; AltName: Full=Phosphatidylcholine 2-acylhydrolase; Flags: Precursor [Vipera renardi]	Vipera renardi	39.7	39.7	1	3e-05	1	137	F8QN51.1
			VSeo_31f.328.328.2 File:"VSeo_31f.raw", NativeID:"controllerType=0 controllerNumber=1 scan=328"	PLA2	NMNTYNKKYK	0,glycidamide[AnyN-term];2,Oxidation[M];	1406.67	2	0.61967	1406.67	-0.002636	0.001	0.998915	sp|P31854|PA2B_VIPBB/	114,K,N/	2	RecName: Full=Basic phospholipase A2 Pla2Vb; Short=VbbPLA2; Short=svPLA2; AltName: Full=Phosphatidylcholine 2-acylhydrolase; Flags: Precursor [Vipera berus berus]	Vipera berus berus	38.4	38.4	1	7e-05	1	138	P31854.2
			VSeo_31f.169.169.2 File:"VSeo_31f.raw", NativeID:"controllerType=0 controllerNumber=1 scan=169"	PLA2	KYKNYSSSNCQENSDKC	4,Deamidated[N];9,Deamidated[N];	1999.82	2	0.61973	1999.8	0.019774	0.001	0.999295	sp|P31854|PA2B_VIPBB/	121,K,-/	3	RecName: Full=Basic phospholipase A2 Pla2Vb; Short=VbbPLA2; Short=svPLA2; AltName: Full=Phosphatidylcholine 2-acylhydrolase; Flags: Precursor [Vipera berus berus]	Vipera berus berus	36.2	36.2	1	0.0005	1	138	P31854.2
			VSeo_32a.33.33.2 File:"VSeo_32a.raw", NativeID:"controllerType=0 controllerNumber=1 scan=33"	PLA2	GKPQDATDR		987.484	2	0	987.485	-0.001479	0.969511	0.230434	sp|A8CG87|PA2A2_DABRR/sp|Q9PWR6|PA2A7_DABPA/sp|Q9YGJ7|PA2A8_DABPA/sp|C0HJC1|PA2_BOTLA/sp|B6CQR5|PA2A2_MACLB/sp|A8CG86|PA2A1_DABRR/sp|Q7T2R1|PA2AA_DABSI/sp|P31854|PA2B_VIPBB/sp|C3W4R6|PA2A1_MACLB/sp|P34180|PA2N2_VIPAA/sp|P81458|PA2B_DABRR/sp|A8CG90|PA2B2_DABRR/sp|B5U6Z2|PA2A_MACLN/sp|Q98996|PA2A_DABPA/sp|A8CG78|PA2A2_DABSI/sp|Q910A0|PA23_ECHCO/	49,K,C/49,K,C/48,K,C/33,R,C/49,K,C/49,Q,C/49,Q,C/49,Q,C/49,K,C/49,K,C/33,K,C/49,K,C/49,K,C/49,K,C/49,K,C/49,K,C/	1	acidic phospholipase A2 [Atheris nitschei]	Atheris nitschei	31.2	31.2	1	0.019	1	139	AJA90799.1
			VSeo_32a.48.48.2 File:"VSeo_32a.raw", NativeID:"controllerType=0 controllerNumber=1 scan=48"	PLA2	TLWIVAVCLIGVEGNLFQFGKMIKYK	22,Oxidation[M];	2986.65	2	0.65739	2986.63	0.018934	0.002	0.999466	sp|F8QN51|PA2A3_VIPRE/	2,R,T/	2	RecName: Full=Acidic phospholipase A2 Vur-PL3; Short=svPLA2; AltName: Full=Phosphatidylcholine 2-acylhydrolase; Flags: Precursor [Vipera renardi]	Vipera renardi	89.7	89.7	1	1e-21	1	137	F8QN51.1
			VSeo_32a.99.99.2 File:"VSeo_32a.raw", NativeID:"controllerType=0 controllerNumber=1 scan=99"	PLA2	NYPSSHCTETEQC	7,Carbamidomethyl[C];13,Carbamidomethyl[C];	1612.59	2	0	1612.6	-0.008583	1.0122	0.0234071	sp|P34180|PA2N2_VIPAA/	124,K,-/	0	ammodytin I2(B) variant [Vipera aspis atra]	Vipera aspis atra	47.7	47.7	1	6e-08	1	137	CAE47230.1
			VSeo_32a.105.105.2 File:"VSeo_32a.raw", NativeID:"controllerType=0 controllerNumber=1 scan=105"	PLA2	NYPSSHCTETEQC	7,Carbamidomethyl[C];13,Carbamidomethyl[C];	1612.59	2	0	1612.6	-0.01078	1.96535	0.076611	sp|P34180|PA2N2_VIPAA/	124,K,-/	0	ammodytin I2(B) variant [Vipera aspis atra]	Vipera aspis atra	47.7	47.7	1	6e-08	1	137	CAE47230.1
			VSeo_32a.170.170.3 File:"VSeo_32a.raw", NativeID:"controllerType=0 controllerNumber=1 scan=170"	PLA2	CCFVHDCCYGR	1,Carbamidomethyl[C];2,Carbamidomethyl[C];7,Carbamidomethyl[C];8,Carbamidomethyl[C];	1533.54	3	0	1533.55	-0.00874	8.54253	0.204162	sp|A8CG87|PA2A2_DABRR/sp|P14421|PA2N_GLOHA/sp|P21789|PA2A_CERCE/sp|Q1RP79|PA2B1_VIPBN/sp|P24294|PA2A2_ERIMA/sp|P14420|PA2B_VIPAE/sp|Q10755|PA2B_VIPAZ/sp|P31854|PA2B_VIPBB/sp|P0DKR3|PA2AA_PSEFE/sp|F8QN51|PA2A3_VIPRE/sp|P34180|PA2N2_VIPAA/sp|P0DPS4|PA2B_CERCE/sp|Q8JFG0|PA2B_VIPAP/sp|Q1RP78|PA2B2_VIPBN/sp|F8QN52|PA2A1_VIPRE/sp|A8CG78|PA2A2_DABSI/sp|Q910A0|PA23_ECHCO/sp|F8QN53|PA2A2_VIPRE/sp|P24293|P…	58,R,V/42,R,L/42,R,V/58,R,V/42,R,V/42,R,V/42,R,V/58,R,A/42,R,V/58,R,V/58,R,V/42,R,A/58,R,V/58,R,V/58,R,V/58,R,V/58,R,V/58,R,V/42,R,V/42,R,V/58,R,V/	0	PLA2(IIA)-Aze2 [Azemiops feae]	Azemiops feae	44.3	44.3	1	6e-07	1	151	ABU68548.1
			VSeo_32a.219.219.3 File:"VSeo_32a.raw", NativeID:"controllerType=0 controllerNumber=1 scan=219"	PLA2	AAAICFGENVNTYDKK	5,Carbamidomethyl[C];	1800.85	3	0	1800.86	-0.007017	1.00913	0.0114805	sp|F8QN51|PA2A3_VIPRE/	106,R,Y/	1	RecName: Full=Acidic phospholipase A2 Vur-PL3; Short=svPLA2; AltName: Full=Phosphatidylcholine 2-acylhydrolase; Flags: Precursor [Vipera renardi]	Vipera renardi	54.5	54.5	1	4e-10	1	137	F8QN51.1
			VSeo_32a.257.257.3 File:"VSeo_32a.raw", NativeID:"controllerType=0 controllerNumber=1 scan=257"	PLA2	VAAICFGENLNTYDKK	5,Carbamidomethyl[C];	1842.9	3	0	1842.91	-0.007823	1.01187	0.00920337	sp|P34180|PA2N2_VIPAA/sp|F8QN53|PA2A2_VIPRE/	106,R,Y/106,R,Y/	1	RecName: Full=Acidic phospholipase A2 Vur-PL2B; Short=Vur-PL2; Short=svPLA2; AltName: Full=Phosphatidylcholine 2-acylhydrolase; Flags: Precursor [Vipera renardi]	Vipera renardi	36.2	36.2	1	0.0004	1	137	F8QN53.1
			VSeo_32a.273.273.2 File:"VSeo_32a.raw", NativeID:"controllerType=0 controllerNumber=1 scan=273"	PLA2	VAAICFGENLNTYDK	5,Carbamidomethyl[C];	1714.8	2	0	1714.81	-0.010693	2.81954	0.0400874	sp|P34180|PA2N2_VIPAA/sp|F8QN53|PA2A2_VIPRE/	106,R,K/106,R,K/	0	ammodytin I2(A'') isoform [Vipera aspis aspis]	Vipera aspis aspis	52	52	1	3e-09	1	137	CAE47205.1
			VSeo_32a.322.322.2 File:"VSeo_32a.raw", NativeID:"controllerType=0 controllerNumber=1 scan=322"	PLA2	LSTYSYSFQNGDIVCGDDNACLR	0,Acetyl[ProteinN-term];15,Carbamidomethyl[C];	2640.14	2	0	2640.13	0.002786	0.001	0.0217039	sp|P24293|PA2A1_ERIMA/	60,K,A/	0	RecName: Full=Acidic phospholipase A2 PLA-1; Short=svPLA2; AltName: Full=Phosphatidylcholine 2-acylhydrolase [Eristicophis macmahoni]	Eristicophis macmahoni	78.3	78.3	1	6e-18	1	121	P24293.1
			VSeo_32b.320.320.2 File:"VSeo_32b.raw", NativeID:"controllerType=0 controllerNumber=1 scan=320"	NGF	YKEYFFETKCKNPNPEPSGCR	0,Acetyl[ProteinN-term];10,Carbamidomethyl[C];12,Deamidated[N];14,Deamidated[N];	2638.14	2	0.047386	2638.16	-0.023194	0.008395	0.0031762	sp|P61898|NGFV_NAJAT/sp|P61899|NGFV_NAJKA/sp|P01140|NGFV_NAJNA/	46,V,G/46,V,G/46,V,G/	3	RecName: Full=Venom nerve growth factor; Short=v-NGF; Short=vNGF [Naja naja]	Naja naja	75.3	75.3	1	5e-17	1	116	P01140.2
			VSeo_32b.225.225.3 File:"VSeo_32b.raw", NativeID:"controllerType=0 controllerNumber=1 scan=225"	NGF	HWNSYCTTTDTFVR	6,Carbamidomethyl[C];	1787.77	3	0.047386	1787.78	-0.006865	14.9797	0.00635783	sp|P30894|NGFV_DABRR/sp|P25428|NGFV_MACLB/	71,K,A/198,K,A/	0	nerve growth factor 1 [Vipera anatolica senliki]	Vipera anatolica senliki	52.4	52.4	1	2e-09	1	244	QHR82782.1
			VSeo_32b.219.219.2 File:"VSeo_32b.raw", NativeID:"controllerType=0 controllerNumber=1 scan=219"	NGF	IDTACVCVISR	5,Carbamidomethyl[C];7,Carbamidomethyl[C];	1293.62	2	0.047386	1293.63	-0.007893	15.8702	0.00912844	sp|Q3HXZ1|NGFV1_OXYMI/sp|A6MFL7|NGFV3_DEMVE/sp|Q90W38|NGFV_BOTJR/sp|P34128|NGFV_BUNMU/sp|Q1W7Q6|NGFV_CRYNI/sp|F8RKW5|NGFV_DRYCN/sp|P25428|NGFV_MACLB/sp|Q3I5F4|NGFV_OXYSC/sp|Q2XXL6|NGFV1_AZEFE/sp|Q5YF90|NGFV1_NAJSP/sp|Q3HXY9|NGFV1_PSETE/sp|A6MFL6|NGFV2_DEMVE/sp|A6MFL5|NGFV1_DEMVE/sp|Q3HXZ0|NGFV2_OXYMI/	227,R,K/226,R,K/224,R,K/227,R,K/227,R,K/226,R,K/227,R,K/227,R,K/206,R,I/227,R,K/227,R,K/226,R,K/226,R,K/227,R,K/	0	nerve growth factor 1 [Vipera anatolica senliki]	Vipera anatolica senliki	39.2	39.2	1	4e-05	1	244	QHR82782.1
			VSeo_32b.252.252.3 File:"VSeo_32b.raw", NativeID:"controllerType=0 controllerNumber=1 scan=252"	PLA2	VAAICFGENLNTYDKK	5,Carbamidomethyl[C];	1842.9	3	0.047386	1842.91	-0.007456	5.43838	0.016882	sp|P34180|PA2N2_VIPAA/sp|F8QN53|PA2A2_VIPRE/	106,R,Y/106,R,Y/	1	RecName: Full=Acidic phospholipase A2 Vur-PL2B; Short=Vur-PL2; Short=svPLA2; AltName: Full=Phosphatidylcholine 2-acylhydrolase; Flags: Precursor [Vipera renardi]	Vipera renardi	36.2	36.2	1	0.0004	1	137	F8QN53.1
			VSeo_32b.186.186.2 File:"VSeo_32b.raw", NativeID:"controllerType=0 controllerNumber=1 scan=186"	NGF	ALTMEGNQASWR	4,Oxidation[M];	1379.63	2	0.047386	1379.64	-0.009673	12.5295	0.0261716	sp|Q3HXY7|NGFV1_NOTSC/sp|Q3HXZ1|NGFV1_OXYMI/sp|Q3HXX7|NGFV2_TROCA/sp|Q3HXY5|NGFV3_NOTSC/sp|Q3HXY1|NGFV3_PSEAU/sp|Q3HXX5|NGFV4_TROCA/sp|Q3HXX4|NGFV5_TROCA/sp|Q90W38|NGFV_BOTJR/sp|Q9DEZ9|NGFV_CRODU/sp|P25428|NGFV_MACLB/sp|P61898|NGFV_NAJAT/sp|P61899|NGFV_NAJKA/sp|P01140|NGFV_NAJNA/sp|Q3I5F4|NGFV_OXYSC/sp|Q3HXY4|NGFV_PSEPO/sp|Q3HXY2|NGFV2_PSEAU/sp|Q3HXY8|NGFV2_PSETE/sp|Q3HXX9|NGFV2_HOPST/sp|Q3HXY6|N…	213,R,F/212,R,F/213,R,F/213,R,F/211,K,F/213,R,F/212,R,F/209,K,F/209,K,F/212,R,F/86,K,F/86,K,F/86,K,F/212,R,F/211,R,F/211,R,F/212,R,F/214,K,F/213,R,F/211,K,F/211,K,F/212,R,F/	0	nerve growth factor 1 [Vipera anatolica senliki]	Vipera anatolica senliki	43.1	43.1	1	2e-06	1	244	QHR82782.1
			VSeo_32b.108.108.2 File:"VSeo_32b.raw", NativeID:"controllerType=0 controllerNumber=1 scan=108"	NGF	NPNPVPSGCR	9,Carbamidomethyl[C];	1097.51	2	0.047386	1097.52	-0.005425	6.33255	0.0339106	sp|Q3HXZ1|NGFV1_OXYMI/sp|A6MFL7|NGFV3_DEMVE/sp|Q3HXY1|NGFV3_PSEAU/sp|Q3HXX6|NGFV3_TROCA/sp|Q3HXX4|NGFV5_TROCA/sp|P34128|NGFV_BUNMU/sp|Q1W7Q6|NGFV_CRYNI/sp|P30894|NGFV_DABRR/sp|F8RKW5|NGFV_DRYCN/sp|Q3I5F4|NGFV_OXYSC/sp|Q3HXY4|NGFV_PSEPO/sp|Q2XXL6|NGFV1_AZEFE/sp|Q3HXY0|NGFV1_HOPST/sp|Q5YF90|NGFV1_NAJSP/sp|Q3HXY9|NGFV1_PSETE/sp|Q3HXY2|NGFV2_PSEAU/sp|Q3HXY8|NGFV2_PSETE/sp|A6MFL6|NGFV2_DEMVE/sp|A6MFL5…	183,R,G/182,K,G/182,R,G/183,R,G/183,R,G/183,R,G/183,R,G/56,K,G/182,R,G/183,R,G/182,R,G/162,R,G/183,R,G/183,R,G/183,R,G/182,R,G/183,R,G/182,K,G/182,K,G/182,R,G/185,P,G/182,K,G/183,R,G/	0	beta-nerve growth factor [Daboia russelii]	Daboia russelii	35.8	35.8	1	0.0005	1	247	ASU45040.1
			VSeo_32b.75.75.3 File:"VSeo_32b.raw", NativeID:"controllerType=0 controllerNumber=1 scan=75"	NGF	CKNPNPVPSGCR	1,Carbamidomethyl[C];11,Carbamidomethyl[C];	1385.64	3	0.047386	1385.64	-0.005154	3.27629	0.0573339	sp|A6MFL7|NGFV3_DEMVE/sp|P30894|NGFV_DABRR/sp|A6MFL6|NGFV2_DEMVE/sp|A6MFL5|NGFV1_DEMVE/sp|Q5YF89|NGFV2_NAJSP/	180,K,G/54,K,G/180,K,G/180,K,G/180,K,G/	1	beta-nerve growth factor [Daboia russelii]	Daboia russelii	43.1	43.1	1	2e-06	1	247	ASU45040.1
			VSeo_32b.171.171.3 File:"VSeo_32b.raw", NativeID:"controllerType=0 controllerNumber=1 scan=171"	PLA2	CCFVHDCCYGR	1,Carbamidomethyl[C];2,Carbamidomethyl[C];7,Carbamidomethyl[C];8,Carbamidomethyl[C];	1533.54	3	0.047386	1533.55	-0.008923	7.05159	0.0589998	sp|A8CG87|PA2A2_DABRR/sp|P14421|PA2N_GLOHA/sp|P21789|PA2A_CERCE/sp|Q1RP79|PA2B1_VIPBN/sp|P24294|PA2A2_ERIMA/sp|P14420|PA2B_VIPAE/sp|Q10755|PA2B_VIPAZ/sp|P31854|PA2B_VIPBB/sp|P0DKR3|PA2AA_PSEFE/sp|F8QN51|PA2A3_VIPRE/sp|P34180|PA2N2_VIPAA/sp|P0DPS4|PA2B_CERCE/sp|Q8JFG0|PA2B_VIPAP/sp|Q1RP78|PA2B2_VIPBN/sp|F8QN52|PA2A1_VIPRE/sp|A8CG78|PA2A2_DABSI/sp|Q910A0|PA23_ECHCO/sp|F8QN53|PA2A2_VIPRE/sp|P24293|P…	58,R,V/42,R,L/42,R,V/58,R,V/42,R,V/42,R,V/42,R,V/58,R,A/42,R,V/58,R,V/58,R,V/42,R,A/58,R,V/58,R,V/58,R,V/58,R,V/58,R,V/58,R,V/42,R,V/42,R,V/58,R,V/	0	PLA2(IIA)-Aze2 [Azemiops feae]	Azemiops feae	44.3	44.3	1	6e-07	1	151	ABU68548.1
			VSeo_32b.298.298.2 File:"VSeo_32b.raw", NativeID:"controllerType=0 controllerNumber=1 scan=298"	NGF	QYFFETK	0,Gln->pyro-Glu[AnyN-termQ];	945.431	2	0.047386	945.435	-0.004326	5.61448	0.0657853	sp|Q3HXY7|NGFV1_NOTSC/sp|Q3HXZ1|NGFV1_OXYMI/sp|Q3HXX7|NGFV2_TROCA/sp|A6MFL7|NGFV3_DEMVE/sp|Q3HXY5|NGFV3_NOTSC/sp|Q3HXY1|NGFV3_PSEAU/sp|Q3HXX6|NGFV3_TROCA/sp|Q3HXX5|NGFV4_TROCA/sp|Q3HXX4|NGFV5_TROCA/sp|B8QCG6|NGFV_AGKCO/sp|Q90W38|NGFV_BOTJR/sp|P34128|NGFV_BUNMU/sp|Q9DEZ9|NGFV_CRODU/sp|Q1W7Q6|NGFV_CRYNI/sp|P30894|NGFV_DABRR/sp|F8RKW5|NGFV_DRYCN/sp|P25428|NGFV_MACLB/sp|Q3I5F4|NGFV_OXYSC/sp|Q3HXY4|NG…	173,K,C/174,K,C/173,K,C/173,K,C/173,K,C/173,K,C/174,K,C/173,K,C/174,K,C/160,K,C/171,K,C/174,K,C/171,K,C/174,K,C/47,K,C/173,K,C/174,R,C/174,K,C/173,K,C/153,K,C/174,K,C/174,K,C/174,K,C/173,K,C/174,K,Y/173,K,C/174,K,C/173,K,C/173,K,C/173,K,C/174,M,C/173,K,C/174,K,C/	0	beta-nerve growth factor [Daboia russelii]	Daboia russelii	27.8	27.8	1	0.19	1	247	ASU45040.1
			VSeo_32b.243.243.2 File:"VSeo_32b.raw", NativeID:"controllerType=0 controllerNumber=1 scan=243"	NGF	QYFFETK		962.458	2	0.047386	962.462	-0.00402	3.94419	0.0803434	sp|Q3HXY7|NGFV1_NOTSC/sp|Q3HXZ1|NGFV1_OXYMI/sp|Q3HXX7|NGFV2_TROCA/sp|A6MFL7|NGFV3_DEMVE/sp|Q3HXY5|NGFV3_NOTSC/sp|Q3HXY1|NGFV3_PSEAU/sp|Q3HXX6|NGFV3_TROCA/sp|Q3HXX5|NGFV4_TROCA/sp|Q3HXX4|NGFV5_TROCA/sp|B8QCG6|NGFV_AGKCO/sp|Q90W38|NGFV_BOTJR/sp|P34128|NGFV_BUNMU/sp|Q9DEZ9|NGFV_CRODU/sp|Q1W7Q6|NGFV_CRYNI/sp|P30894|NGFV_DABRR/sp|F8RKW5|NGFV_DRYCN/sp|P25428|NGFV_MACLB/sp|Q3I5F4|NGFV_OXYSC/sp|Q3HXY4|NG…	173,K,C/174,K,C/173,K,C/173,K,C/173,K,C/173,K,C/174,K,C/173,K,C/174,K,C/160,K,C/171,K,C/174,K,C/171,K,C/174,K,C/47,K,C/173,K,C/174,R,C/174,K,C/173,K,C/153,K,C/174,K,C/174,K,C/174,K,C/173,K,C/174,K,Y/173,K,C/174,K,C/173,K,C/173,K,C/173,K,C/174,M,C/173,K,C/174,K,C/	0	beta-nerve growth factor [Daboia russelii]	Daboia russelii	27.8	27.8	1	0.19	1	247	ASU45040.1
			VSeo_32b.72.72.2 File:"VSeo_32b.raw", NativeID:"controllerType=0 controllerNumber=1 scan=72"	NGF	TTATDIR		777.407	2	0.047386	777.41	-0.002736	5.31229	0.104056	sp|Q3HXY7|NGFV1_NOTSC/sp|Q3HXX7|NGFV2_TROCA/sp|Q3HXY5|NGFV3_NOTSC/sp|Q3HXX5|NGFV4_TROCA/sp|B8QCG6|NGFV_AGKCO/sp|Q90W38|NGFV_BOTJR/sp|Q9DEZ9|NGFV_CRODU/sp|P25428|NGFV_MACLB/sp|Q2XXL6|NGFV1_AZEFE/sp|Q3HXY6|NGFV2_NOTSC/	148,K,G/148,K,G/148,K,G/148,K,G/135,K,G/146,K,G/146,K,G/149,K,G/128,K,G/148,K,G/	0	nerve growth factor [Ovophis okinavensis]	Ovophis okinavensis	24.8	24.8	1	2.4	1	295	BAN82142.1
			VSeo_32b.262.262.3 File:"VSeo_32b.raw", NativeID:"controllerType=0 controllerNumber=1 scan=262"	NGF	AQTHEGLKTSRNTDQR	12,Deamidated[N];	1842.9	3	0.047386	1842.91	-0.008182	0.940426	0.126651	sp|Q3HXY7|NGFV1_NOTSC/sp|Q3HXZ1|NGFV1_OXYMI/sp|Q3HXX7|NGFV2_TROCA/sp|Q3HXY5|NGFV3_NOTSC/sp|Q3HXY1|NGFV3_PSEAU/sp|Q3HXX6|NGFV3_TROCA/sp|Q3HXX5|NGFV4_TROCA/sp|Q3HXX4|NGFV5_TROCA/sp|Q1W7Q6|NGFV_CRYNI/sp|F8RKW5|NGFV_DRYCN/sp|Q3I5F4|NGFV_OXYSC/sp|Q3HXY4|NGFV_PSEPO/sp|Q3HXY0|NGFV1_HOPST/sp|Q5YF90|NGFV1_NAJSP/sp|Q3HXY9|NGFV1_PSETE/sp|Q3HXY8|NGFV2_PSETE/sp|Q3HXX9|NGFV2_HOPST/sp|Q3HXY6|NGFV2_NOTSC/sp|Q3HX…	41,C,H/41,C,H/41,C,H/41,C,H/41,C,H/41,C,H/41,C,H/41,C,H/41,C,H/41,C,H/41,C,H/41,C,H/41,C,H/41,C,H/41,C,H/41,C,H/41,C,H/41,C,H/41,C,H/41,C,H/41,C,H/	2	RecName: Full=Venom nerve growth factor 1; Short=v-NGF-1; Short=vNGF-1; Flags: Precursor [Tropidechis carinatus]	Tropidechis carinatus	53.2	53.2	1	1e-09	1	245	Q3HXX8.1
			VSeo_32b.308.308.2 File:"VSeo_32b.raw", NativeID:"controllerType=0 controllerNumber=1 scan=308"	PLA2	NLYQFGNMIFK	8,Oxidation[M];	1390.67	2	0.047386	1390.68	-0.009424	3.02507	0.202253	sp|P34180|PA2N2_VIPAA/	16,G,M/	0	ammodytin I2(B) variant [Vipera aspis atra]	Vipera aspis atra	41.8	41.8	1	5e-06	1	137	CAE47230.1
			VSeo_32b.40.40.2 File:"VSeo_32b.raw", NativeID:"controllerType=0 controllerNumber=1 scan=40"	PLA2	GKPQDATDR		987.482	2	0.047386	987.485	-0.003065	1.83491	0.258814	sp|A8CG87|PA2A2_DABRR/sp|Q9PWR6|PA2A7_DABPA/sp|Q9YGJ7|PA2A8_DABPA/sp|C0HJC1|PA2_BOTLA/sp|B6CQR5|PA2A2_MACLB/sp|A8CG86|PA2A1_DABRR/sp|Q7T2R1|PA2AA_DABSI/sp|P31854|PA2B_VIPBB/sp|C3W4R6|PA2A1_MACLB/sp|P34180|PA2N2_VIPAA/sp|P81458|PA2B_DABRR/sp|A8CG90|PA2B2_DABRR/sp|B5U6Z2|PA2A_MACLN/sp|Q98996|PA2A_DABPA/sp|A8CG78|PA2A2_DABSI/sp|Q910A0|PA23_ECHCO/	49,K,C/49,K,C/48,K,C/33,R,C/49,K,C/49,Q,C/49,Q,C/49,Q,C/49,K,C/49,K,C/33,K,C/49,K,C/49,K,C/49,K,C/49,K,C/49,K,C/	1	acidic phospholipase A2 [Atheris nitschei]	Atheris nitschei	31.2	31.2	1	0.019	1	139	AJA90799.1
			VSeo_32b.31.31.3 File:"VSeo_32b.raw", NativeID:"controllerType=0 controllerNumber=1 scan=31"	NGF	TKAMDIK	7,unknown[196.085 Da][111][K](Nmethylmaleimide[K]);	917.47	3	0.047386	917.476	-0.006157	0.002	0.405923	sp|Q3HXZ1|NGFV1_OXYMI/sp|Q3HXY9|NGFV1_PSETE/sp|Q3HXY8|NGFV2_PSETE/sp|Q3HXZ0|NGFV2_OXYMI/	149,K,G/149,K,G/149,K,G/149,K,G/	1	RecName: Full=Venom nerve growth factor 2; Short=v-NGF-2; Short=vNGF-2; Flags: Precursor [Oxyuranus microlepidotus]	Oxyuranus microlepidotus	26.1	26.1	1	0.84	1	243	Q3HXZ0.1
			VSeo_32b.268.268.2 File:"VSeo_32b.raw", NativeID:"controllerType=0 controllerNumber=1 scan=268"	NGF	ENVNLDNK	0,Acetyl[ProteinN-term];2,Deamidated[N];	988.472	2	0.61868	988.458	0.01414	0.861181	0.976394	sp|P61898|NGFV_NAJAT/sp|P61899|NGFV_NAJKA/sp|P01140|NGFV_NAJNA/sp|Q5YF89|NGFV2_NAJSP/	37,M,V/37,M,V/37,M,V/162,M,V/	0	RecName: Full=Venom nerve growth factor 2; Short=v-NGF-2; Short=vNGF-2; AltName: Full=Nerve growth factor II; Flags: Precursor [Naja sputatrix]	Naja sputatrix	29.1	29.1	1	0.092	1	241	Q5YF89.1
			VSeo_32c.329.329.2 File:"VSeo_32c.raw", NativeID:"controllerType=0 controllerNumber=1 scan=329"	PLA2	LSIYSYSFENGDIVCGGDDPCLR	15,Carbamidomethyl[C];21,Carbamidomethyl[C];	2637.13	2	0	2637.16	-0.032467	20.1585	2.22772e-08	sp|P34180|PA2N2_VIPAA/	76,K,A/	0	ammodytin I2(B) variant [Vipera aspis atra]	Vipera aspis atra	78.7	78.7	1	4e-18	1	137	CAE47230.1
			VSeo_32c.296.296.3 File:"VSeo_32c.raw", NativeID:"controllerType=0 controllerNumber=1 scan=296"	PLA2	SALLSYSNYGCYCGWGGK	11,Carbamidomethyl[C];13,Carbamidomethyl[C];	2042.87	3	0	2042.87	-0.000162	23.8625	9.84911e-08	sp|P34180|PA2N2_VIPAA/	31,K,G/	0	ammodytin I2(A) isoform [Vipera aspis aspis]	Vipera aspis aspis	62.6	62.6	1	7e-13	1	68	CAE47206.1
			VSeo_32c.257.257.2 File:"VSeo_32c.raw", NativeID:"controllerType=0 controllerNumber=1 scan=257"	PLA2	VAAICFGENLNTYDKK	5,Carbamidomethyl[C];	1842.89	2	0	1842.91	-0.014096	21.2129	1.44325e-07	sp|P34180|PA2N2_VIPAA/sp|F8QN53|PA2A2_VIPRE/	106,R,Y/106,R,Y/	1	RecName: Full=Acidic phospholipase A2 Vur-PL2B; Short=Vur-PL2; Short=svPLA2; AltName: Full=Phosphatidylcholine 2-acylhydrolase; Flags: Precursor [Vipera renardi]	Vipera renardi	36.2	36.2	1	0.0004	1	137	F8QN53.1
			VSeo_32c.286.286.2 File:"VSeo_32c.raw", NativeID:"controllerType=0 controllerNumber=1 scan=286"	PLA2	VAAICFGENLNTYDK	5,Carbamidomethyl[C];	1714.8	2	0	1714.81	-0.011913	18.3317	3.63895e-07	sp|P34180|PA2N2_VIPAA/sp|F8QN53|PA2A2_VIPRE/	106,R,K/106,R,K/	0	ammodytin I2(A'') isoform [Vipera aspis aspis]	Vipera aspis aspis	52	52	1	3e-09	1	137	CAE47205.1
			VSeo_32c.103.103.2 File:"VSeo_32c.raw", NativeID:"controllerType=0 controllerNumber=1 scan=103"	PLA2	NYPSSHCTETEQC	7,Carbamidomethyl[C];13,Carbamidomethyl[C];	1612.59	2	0	1612.6	-0.014808	12.5005	3.76824e-06	sp|P34180|PA2N2_VIPAA/	124,K,-/	0	ammodytin I2(B) variant [Vipera aspis atra]	Vipera aspis atra	47.7	47.7	1	6e-08	1	137	CAE47230.1
			VSeo_32c.172.172.3 File:"VSeo_32c.raw", NativeID:"controllerType=0 controllerNumber=1 scan=172"	PLA2	CCFVHDCCYGR	1,Carbamidomethyl[C];2,Carbamidomethyl[C];7,Carbamidomethyl[C];8,Carbamidomethyl[C];	1533.54	3	0	1533.55	-0.008648	15.8926	1.45603e-05	sp|A8CG87|PA2A2_DABRR/sp|P14421|PA2N_GLOHA/sp|P21789|PA2A_CERCE/sp|Q1RP79|PA2B1_VIPBN/sp|P24294|PA2A2_ERIMA/sp|P14420|PA2B_VIPAE/sp|Q10755|PA2B_VIPAZ/sp|P31854|PA2B_VIPBB/sp|P0DKR3|PA2AA_PSEFE/sp|F8QN51|PA2A3_VIPRE/sp|P34180|PA2N2_VIPAA/sp|P0DPS4|PA2B_CERCE/sp|Q8JFG0|PA2B_VIPAP/sp|Q1RP78|PA2B2_VIPBN/sp|F8QN52|PA2A1_VIPRE/sp|A8CG78|PA2A2_DABSI/sp|Q910A0|PA23_ECHCO/sp|F8QN53|PA2A2_VIPRE/sp|P24293|P…	58,R,V/42,R,L/42,R,V/58,R,V/42,R,V/42,R,V/42,R,V/58,R,A/42,R,V/58,R,V/58,R,V/42,R,A/58,R,V/58,R,V/58,R,V/58,R,V/58,R,V/58,R,V/42,R,V/42,R,V/58,R,V/	0	PLA2(IIA)-Aze2 [Azemiops feae]	Azemiops feae	44.3	44.3	1	6e-07	1	151	ABU68548.1
			VSeo_32c.356.356.2 File:"VSeo_32c.raw", NativeID:"controllerType=0 controllerNumber=1 scan=356"	PLA2	NLYQFGNMIFK		1374.68	2	0	1374.69	-0.008039	15.511	8.97969e-05	sp|P34180|PA2N2_VIPAA/	16,G,M/	0	ammodytin I2(B) variant [Vipera aspis atra]	Vipera aspis atra	41.8	41.8	1	5e-06	1	137	CAE47230.1
			VSeo_32c.322.322.2 File:"VSeo_32c.raw", NativeID:"controllerType=0 controllerNumber=1 scan=322"	PLA2	NLYQFGNMIFK	8,Oxidation[M];	1390.67	2	0	1390.68	-0.0104	15.523	9.49059e-05	sp|P34180|PA2N2_VIPAA/	16,G,M/	0	ammodytin I2(B) variant [Vipera aspis atra]	Vipera aspis atra	41.8	41.8	1	5e-06	1	137	CAE47230.1
			VSeo_32c.91.91.2 File:"VSeo_32c.raw", NativeID:"controllerType=0 controllerNumber=1 scan=91"	VEGF	CSGCCTDESLK	1,Carbamidomethyl[C];4,Carbamidomethyl[C];5,Carbamidomethyl[C];	1316.48	2	0	1316.49	-0.009149	12.8108	0.000127469	sp|P83942|TXVE_VIPAP/sp|P67863|TXVE_VIPAA/sp|P82475|TXVE2_MACLB/	44,R,C/68,R,C/44,R,C/	0	vammin-1' [Vipera ammodytes ammodytes]	Vipera ammodytes ammodytes	39.2	39.2	1	4e-05	1	145	APB93447.1
			VSeo_32c.244.244.3 File:"VSeo_32c.raw", NativeID:"controllerType=0 controllerNumber=1 scan=244"	VEGF	QVRPFLEVHER	0,Gln->pyro-Glu[AnyN-termQ];	1392.73	3	0	1392.74	-0.004608	15.1356	0.000142581	sp|P83942|TXVE_VIPAP/sp|P67863|TXVE_VIPAA/	0,-,S/24,G,S/	1	vammin-1' [Vipera ammodytes ammodytes]	Vipera ammodytes ammodytes	40.1	40.1	1	2e-05	1	145	APB93447.1
			VSeo_32c.193.193.3 File:"VSeo_32c.raw", NativeID:"controllerType=0 controllerNumber=1 scan=193"	VEGF	PFLEVHER		1026.54	3	0	1026.54	-0.001194	10.8324	0.000287822	sp|P83942|TXVE_VIPAP/sp|P67863|TXVE_VIPAA/	3,R,S/27,R,S/	0	vammin-1' [Vipera ammodytes ammodytes]	Vipera ammodytes ammodytes	30.3	30.3	1	0.031	1	145	APB93447.1
			VSeo_32c.187.187.2 File:"VSeo_32c.raw", NativeID:"controllerType=0 controllerNumber=1 scan=187"	VEGF	PSCVAVLR	3,Carbamidomethyl[C];	901.491	2	0	901.492	-0.001648	11.7249	0.000302215	sp|C0K3N1|TXVE_BITAR/sp|P67861|TXVE_DABRR/sp|P83942|TXVE_VIPAP/sp|P0DL42|TXVE_DABSI/sp|P67863|TXVE_VIPAA/sp|P82475|TXVE2_MACLB/	60,R,C/60,R,C/36,R,C/36,R,C/60,R,C/36,R,C/	0	RecName: Full=Snake venom vascular endothelial growth factor toxin barietin; Short=svVEGF; AltName: Full=VEGF-F; Flags: Precursor [Bitis arietans]	Bitis arietans	28.2	28.2	1	0.18	1	150	C0K3N1.1
			VSeo_32c.367.367.2 File:"VSeo_32c.raw", NativeID:"controllerType=0 controllerNumber=1 scan=367"	PLA2	NLYQFGNMIFK	0,unknown[26.016 Da][AnyN-term];	1400.7	2	0	1400.7	-0.005745	12.5885	0.000495811	sp|P34180|PA2N2_VIPAA/	16,G,M/	0	ammodytin I2(B) variant [Vipera aspis atra]	Vipera aspis atra	41.8	41.8	1	5e-06	1	137	CAE47230.1
			VSeo_32c.199.199.2 File:"VSeo_32c.raw", NativeID:"controllerType=0 controllerNumber=1 scan=199"	PLA2	AAAICFR	5,Carbamidomethyl[C];	808.409	2	0	808.413	-0.004035	8.7342	0.00120148	sp|P81478|PA2A2_TRIGA/sp|P14418|PA2A_GLOHA/sp|P0DKU1|PA2H_GLOUS/sp|O42190|PA2A6_GLOHA/sp|O42189|PA2A5_GLOHA/sp|C0HKC4|PA2B1_AGKPC/sp|P51972|PA2B1_AGKPI/sp|Q91506|PA2A1_PROMU/sp|P00625|PA2A1_OVOOK/sp|P18998|PA2HA_CROSS/sp|F8QN50|PA2HS_VIPRE/sp|C0HLF0|PA2_POROP/sp|Q6H3C8|PA2AF_TRIST/sp|P17935|PA2HL_VIPAA/sp|O42188|PA2H_GLOHA/sp|Q2YHJ3|PA2A_TRIBO/sp|P14424|PA2BB_VIPAA/sp|C0HK16|PA2BD_DABRR/sp|Q02517…	90,K,D/90,R,D/90,R,D/90,R,D/90,R,D/90,R,D/90,R,D/89,R,D/106,L,D/106,K,D/106,R,E/89,K,D/106,K,D/106,R,E/90,K,D/106,R,D/106,R,K/90,K,Q/106,K,D/105,R,D/106,K,D/106,K,Q/106,K,D/90,R,D/106,K,E/106,K,E/106,R,K/106,K,D/90,K,R/90,K,D/90,K,D/90,R,E/90,R,D/106,R,D/106,K,D/105,R,D/106,R,K/106,R,K/106,R,D/106,K,D/106,K,D/106,K,N/106,K,D/106,R,D/106,K,D/106,K,D/106,K,D/90,K,D/90,R,D/106,K,D/90,K,Q/106,K,D/90,…	0	PLA2(IIA)-Aze2 [Azemiops feae]	Azemiops feae	25.7	25.7	1	1.1	1	151	ABU68548.1
			VSeo_32c.184.184.2 File:"VSeo_32c.raw", NativeID:"controllerType=0 controllerNumber=1 scan=184"	VEGF	HTVDLQIMR	8,Oxidation[M];	1128.58	2	0	1128.58	-0.007464	8.64242	0.00149196	sp|P83942|TXVE_VIPAP/sp|P67863|TXVE_VIPAA/	61,K,V/85,K,V/	0	vammin-1' [Vipera ammodytes ammodytes]	Vipera ammodytes ammodytes	34.1	34.1	1	0.002	1	145	APB93447.1
			VSeo_32c.76.76.3 File:"VSeo_32c.raw", NativeID:"controllerType=0 controllerNumber=1 scan=76"	VEGF	FTEHTACECRPR	7,Carbamidomethyl[C];9,Carbamidomethyl[C];	1563.67	3	0	1563.68	-0.005056	6.41318	0.00188935	sp|P83942|TXVE_VIPAP/sp|P67863|TXVE_VIPAA/sp|P82475|TXVE2_MACLB/	84,K,R/108,K,R/84,K,R/	1	vammin-1' [Vipera ammodytes ammodytes]	Vipera ammodytes ammodytes	44.8	44.8	1	5e-07	1	145	APB93447.1
			VSeo_32c.224.224.3 File:"VSeo_32c.raw", NativeID:"controllerType=0 controllerNumber=1 scan=224"	PLA2	AAAICFRDNLDTYDR	5,Carbamidomethyl[C];	1800.85	3	0	1800.83	0.015571	6.36984	0.00230603	sp|Q91506|PA2A1_PROMU/sp|Q2PG83|PA2A_PROEL/sp|P06859|PA2A1_PROFL/	89,R,K/105,R,K/105,R,N/	1	Asp49 phospholipase A2 isozyme [Protobothrops tokarensis]	Protobothrops tokarensis	52.8	52.8	1	1e-09	1	138	ALN37914.1
			VSeo_32c.214.214.2 File:"VSeo_32c.raw", NativeID:"controllerType=0 controllerNumber=1 scan=214"	PLA2	SNYGCYCGWGGK	5,Carbamidomethyl[C];7,Carbamidomethyl[C];	1408.53	2	0	1408.54	-0.006235	6.32457	0.0027845	sp|P34180|PA2N2_VIPAA/sp|A8CG90|PA2B2_DABRR/sp|Q910A0|PA23_ECHCO/	37,Y,G/37,Y,G/37,Y,G/	0	RecName: Full=Phospholipase A2 EC3; AltName: Full=Phosphatidylcholine 2-acylhydrolase; Flags: Precursor [Echis coloratus]	Echis coloratus	44.8	44.8	1	5e-07	1	138	Q910A0.1
			VSeo_32c.50.50.2 File:"VSeo_32c.raw", NativeID:"controllerType=0 controllerNumber=1 scan=50"	PLA2	AVCECDR	3,Carbamidomethyl[C];5,Carbamidomethyl[C];	909.353	2	0	909.355	-0.002141	5.36387	0.00411042	sp|P0CAR9|PA2A1_CERCE/sp|Q90ZZ9|PA21_ECHCO/sp|A8CG87|PA2A2_DABRR/sp|P04084|PA2HA_VIPAE/sp|Q9PWR6|PA2A7_DABPA/sp|Q9YGJ7|PA2A8_DABPA/sp|P21789|PA2A_CERCE/sp|B6CQR5|PA2A2_MACLB/sp|A4VBF0|PA2H_VIPBN/sp|Q10754|PA2H_VIPAZ/sp|Q8JFG1|PA2H_VIPAP/sp|P0DKR3|PA2AA_PSEFE/sp|Q7T3T5|PA2AB_DABSI/sp|P59170|PA2A4_ECHCS/sp|C3W4R6|PA2A1_MACLB/sp|P34180|PA2N2_VIPAA/sp|P81458|PA2B_DABRR/sp|Q7T3S7|PA2A1_ECHCA/sp|A8CG90…	98,R,V/99,K,E/99,R,V/83,R,A/99,R,V/98,R,V/83,R,V/99,R,V/99,R,A/99,R,A/99,R,A/83,R,A/91,R,V/99,K,E/99,R,V/99,R,V/83,R,V/99,R,E/99,R,V/99,R,V/99,R,V/99,R,V/99,R,V/99,R,V/99,R,V/99,R,V/99,K,E/83,R,V/99,R,V/99,R,V/	0	acidic phospholipase A2 [Echis carinatus]	Echis carinatus	27.4	27.4	1	0.28	1	139	AJA90797.1
			VSeo_32c.209.209.3 File:"VSeo_32c.raw", NativeID:"controllerType=0 controllerNumber=1 scan=209"	PLA2	RCCFVHDCCYGR	4,Phe->Met[F];8,Carbamidomethyl[C];9,Carbamidomethyl[C];	1559.56	3	0	1559.58	-0.020705	7.33745	0.00427371	sp|A8CG87|PA2A2_DABRR/sp|P14421|PA2N_GLOHA/sp|P21789|PA2A_CERCE/sp|Q1RP79|PA2B1_VIPBN/sp|P24294|PA2A2_ERIMA/sp|P14420|PA2B_VIPAE/sp|Q10755|PA2B_VIPAZ/sp|P31854|PA2B_VIPBB/sp|P0DKR3|PA2AA_PSEFE/sp|F8QN51|PA2A3_VIPRE/sp|P34180|PA2N2_VIPAA/sp|P0DPS4|PA2B_CERCE/sp|Q8JFG0|PA2B_VIPAP/sp|Q1RP78|PA2B2_VIPBN/sp|F8QN52|PA2A1_VIPRE/sp|A8CG78|PA2A2_DABSI/sp|Q910A0|PA23_ECHCO/sp|F8QN53|PA2A2_VIPRE/sp|P24293|P…	57,D,V/41,D,L/41,D,V/57,D,V/41,D,V/41,D,V/41,D,V/57,D,A/41,D,V/57,D,V/57,D,V/41,D,A/57,D,V/57,D,V/57,D,V/57,D,V/57,D,V/57,D,V/41,D,V/41,D,V/57,D,V/	1	PLA2(IIA)-Aze2 [Azemiops feae]	Azemiops feae	47.7	47.7	1	5e-08	1	151	ABU68548.1
			VSeo_32c.100.100.2 File:"VSeo_32c.raw", NativeID:"controllerType=0 controllerNumber=1 scan=100"	PLA2	NYPSSHCTETEQC	7,Carbamidomethyl[C];13,Carbamidomethyl[C];	1612.59	2	0	1612.6	-0.009803	10.1275	0.00434009	sp|P34180|PA2N2_VIPAA/	124,K,-/	0	ammodytin I2(B) variant [Vipera aspis atra]	Vipera aspis atra	47.7	47.7	1	6e-08	1	137	CAE47230.1
			VSeo_32c.247.247.2 File:"VSeo_32c.raw", NativeID:"controllerType=0 controllerNumber=1 scan=247"	PLA2	KSALLSYSNY		1145.58	2	0	1145.58	-0.00659	10.3184	0.00502346	sp|P34180|PA2N2_VIPAA/	30,K,G/	1	ammodytin I2(B) variant [Vipera aspis atra]	Vipera aspis atra	34.1	34.1	1	0.002	1	137	CAE47230.1
			VSeo_32c.163.163.3 File:"VSeo_32c.raw", NativeID:"controllerType=0 controllerNumber=1 scan=163"	PLA2	CCFVHSCCYAK	1,Carbamidomethyl[C];2,Carbamidomethyl[C];7,Carbamidomethyl[C];8,Carbamidomethyl[C];	1491.56	3	0	1491.56	-0.00749	5.56327	0.00562508	sp|F8QN50|PA2HS_VIPRE/sp|P17935|PA2HL_VIPAA/	58,R,L/58,R,L/	0	ammodytin L(2) isoform [Vipera berus berus]	Vipera berus berus	43.1	43.1	1	2e-06	1	138	CAE47248.1
			VSeo_32c.340.340.2 File:"VSeo_32c.raw", NativeID:"controllerType=0 controllerNumber=1 scan=340"	PLA2	LSIYSYSFENGDIVCGGDD	15,Carbamidomethyl[C];	2110.88	2	0	2110.89	-0.0078	13.7609	0.00630799	sp|P34180|PA2N2_VIPAA/	76,K,P/	0	ammodytin I2(B) variant [Vipera aspis atra]	Vipera aspis atra	61.7	61.7	1	2e-12	1	137	CAE47230.1
			VSeo_32c.32.32.3 File:"VSeo_32c.raw", NativeID:"controllerType=0 controllerNumber=1 scan=32"	PLA2	GKPQDATDR		987.485	3	0	987.485	-0.000607	8.16628	0.0116095	sp|A8CG87|PA2A2_DABRR/sp|Q9PWR6|PA2A7_DABPA/sp|Q9YGJ7|PA2A8_DABPA/sp|C0HJC1|PA2_BOTLA/sp|B6CQR5|PA2A2_MACLB/sp|A8CG86|PA2A1_DABRR/sp|Q7T2R1|PA2AA_DABSI/sp|P31854|PA2B_VIPBB/sp|C3W4R6|PA2A1_MACLB/sp|P34180|PA2N2_VIPAA/sp|P81458|PA2B_DABRR/sp|A8CG90|PA2B2_DABRR/sp|B5U6Z2|PA2A_MACLN/sp|Q98996|PA2A_DABPA/sp|A8CG78|PA2A2_DABSI/sp|Q910A0|PA23_ECHCO/	49,K,C/49,K,C/48,K,C/33,R,C/49,K,C/49,Q,C/49,Q,C/49,Q,C/49,K,C/49,K,C/33,K,C/49,K,C/49,K,C/49,K,C/49,K,C/49,K,C/	1	acidic phospholipase A2 [Atheris nitschei]	Atheris nitschei	31.2	31.2	1	0.019	1	139	AJA90799.1
			VSeo_32c.220.220.2 File:"VSeo_32c.raw", NativeID:"controllerType=0 controllerNumber=1 scan=220"	VEGF	HTVDLQIMR		1112.58	2	0	1112.59	-0.007666	8.51604	0.0118162	sp|P83942|TXVE_VIPAP/sp|P67863|TXVE_VIPAA/	61,K,V/85,K,V/	0	vammin-1' [Vipera ammodytes ammodytes]	Vipera ammodytes ammodytes	34.1	34.1	1	0.002	1	145	APB93447.1
			VSeo_32c.359.359.2 File:"VSeo_32c.raw", NativeID:"controllerType=0 controllerNumber=1 scan=359"	PLA2	GNLYQFGNMIFK		1431.7	2	0	1431.71	-0.008139	9.05391	0.0349909	sp|P34180|PA2N2_VIPAA/	15,E,M/	0	ammodytin I2(B) variant [Vipera aspis atra]	Vipera aspis atra	44.3	44.3	1	8e-07	1	137	CAE47230.1
			VSeo_32c.392.392.2 File:"VSeo_32c.raw", NativeID:"controllerType=0 controllerNumber=1 scan=392"	PLA2	NLYQFGNMIFK	1,Deamidated[N];	1375.67	2	0	1375.67	-0.005727	8.23413	0.0418413	sp|P34180|PA2N2_VIPAA/	16,G,M/	0	ammodytin I2(B) variant [Vipera aspis atra]	Vipera aspis atra	41.8	41.8	1	5e-06	1	137	CAE47230.1
			VSeo_32c.284.284.2 File:"VSeo_32c.raw", NativeID:"controllerType=0 controllerNumber=1 scan=284"	PLA2	NLFQFGK		853.456	2	0	853.457	-0.000219	4.97612	0.0774178	sp|F8QN51|PA2A3_VIPRE/sp|P0CAS0|PA2A2_CERCE/	16,G,M/16,G,M/	0	RecName: Full=Acidic phospholipase A2 Vur-PL3; Short=svPLA2; AltName: Full=Phosphatidylcholine 2-acylhydrolase; Flags: Precursor [Vipera renardi]	Vipera renardi	26.1	26.1	1	0.85	1	137	F8QN51.1
			VSeo_32c.307.307.2 File:"VSeo_32c.raw", NativeID:"controllerType=0 controllerNumber=1 scan=307"	PLA2	VAAICFGENVNTYDK	5,maleimide[C];	1740.82	2	0	1740.79	0.029818	2.63711	0.092054	sp|P21789|PA2A_CERCE/sp|P0DPS4|PA2B_CERCE/	90,R,K/90,R,K/	0	RecName: Full=Acidic phospholipase A2 Cc1-PLA2; Short=svPLA2; AltName: Full=Phosphatidylcholine 2-acylhydrolase [Cerastes cerastes]	Cerastes cerastes	33.9	33.9	1	0.002	1	120	P21789.1
			VSeo_32c.368.368.2 File:"VSeo_32c.raw", NativeID:"controllerType=0 controllerNumber=1 scan=368"	PLA2	NLYQFGNMIFK	0,Acetyl[ProteinN-term];	1416.69	2	0	1416.7	-0.008228	4.6001	0.22511	sp|P34180|PA2N2_VIPAA/	16,G,M/	0	ammodytin I2(B) variant [Vipera aspis atra]	Vipera aspis atra	41.8	41.8	1	5e-06	1	137	CAE47230.1
			VSeo_32c.370.370.2 File:"VSeo_32c.raw", NativeID:"controllerType=0 controllerNumber=1 scan=370"	PLA2	DLMQFETLIMK	3,Oxidation[M];10,Oxidation[M];	1400.7	2	0	1400.68	0.015422	1.72356	0.245067	sp|P0DUN0|PA23_BOTHY/sp|P0DJJ7|PA2A_OVOMO/sp|A0A411EZW9|PA21_AGKPL/	0,-,S/0,-,I/16,G,I/	0	RecName: Full=Acidic phospholipase A2 Omo-E6; Short=svPLA2; AltName: Full=Phosphatidylcholine 2-acylhydrolase [Ovophis monticola]	Ovophis monticola	41.8	41.8	1	2e-06	1	29	P0DJJ7.1
			VSeo_32c.46.46.2 File:"VSeo_32c.raw", NativeID:"controllerType=0 controllerNumber=1 scan=46"	PLA2	VNGCDPK	4,Carbamidomethyl[C];	789.355	2	0	789.356	-0.001208	3.44285	0.301218	sp|P20476|PA2A1_TRIGA/sp|Q9PWR6|PA2A7_DABPA/sp|P81479|PA2A4_TRIGA/sp|Q9YGJ7|PA2A8_DABPA/sp|B6CQR5|PA2A2_MACLB/sp|P81480|PA2A3_TRIGA/sp|Q6H3C8|PA2AF_TRIST/sp|Q6H3D0|PA2AA_TRIST/sp|C3W4R6|PA2A1_MACLB/sp|P34180|PA2N2_VIPAA/sp|F8QN52|PA2A1_VIPRE/sp|Q2YHJ5|PA2AB_TRIPE/sp|B5U6Z2|PA2A_MACLN/sp|Q98996|PA2A_DABPA/sp|Q910A0|PA23_ECHCO/sp|F8QN53|PA2A2_VIPRE/sp|P70088|PA2A6_TRIGA/sp|Q910A1|PA2A1_VIPAA/	69,K,K/69,T,L/53,K,K/68,T,L/69,S,L/53,K,K/69,K,D/69,K,K/69,S,L/69,R,L/69,R,M/53,K,D/69,T,L/69,T,L/69,R,M/69,R,L/69,K,D/69,R,M/	0	RecName: Full=Acidic phospholipase A2 VpaPLA2; Short=svPLA2; AltName: Full=Phosphatidylcholine 2-acylhydrolase; Flags: Precursor [Daboia palaestinae]	Daboia palaestinae	26.1	26.1	1	0.8	1	138	Q98996.1
			VSeo_32c.217.217.3 File:"VSeo_32c.raw", NativeID:"controllerType=0 controllerNumber=1 scan=217"	VEGF	PFLDVYER		1038.54	3	0	1038.53	0.011045	1.01138	0.319166	sp|P67861|TXVE_DABRR/	27,R,S/	0	RecName: Full=Snake venom vascular endothelial growth factor toxin VR-1; Short=svVEGF; AltName: Full=VEGF-F; Flags: Precursor [Daboia russelii]	Daboia russelii	30.8	30.8	1	0.023	1	144	P67861.2
			VSeo_32c.49.49.2 File:"VSeo_32c.raw", NativeID:"controllerType=0 controllerNumber=1 scan=49"	VEGF	CTPVGK	1,Carbamidomethyl[C];	661.333	2	0	661.334	-0.000322	1.92437	0.323685	sp|P67861|TXVE_DABRR/sp|P83942|TXVE_VIPAP/sp|P0DL42|TXVE_DABSI/sp|P67863|TXVE_VIPAA/sp|P82475|TXVE2_MACLB/	79,K,H/55,K,H/55,K,H/79,K,H/55,K,H/	0	vammin-1' [Vipera ammodytes ammodytes]	Vipera ammodytes ammodytes	22.3	22.3	1	14	1	145	APB93447.1
			VSeo_32c.365.365.2 File:"VSeo_32c.raw", NativeID:"controllerType=0 controllerNumber=1 scan=365"	PLA2	NLYQFGNMIFK	1,Deamidated[N];8,Oxidation[M];	1391.66	2	0.093301	1391.67	-0.004792	1.01394	0.718678	sp|P34180|PA2N2_VIPAA/	16,G,M/	0	ammodytin I2(B) variant [Vipera aspis atra]	Vipera aspis atra	41.8	41.8	1	5e-06	1	137	CAE47230.1
			VSeo_32c.436.436.2 File:"VSeo_32c.raw", NativeID:"controllerType=0 controllerNumber=1 scan=436"	VEGF	WPSGTVQGEVRPFMEVYQR		2266.14	2	0.10971	2266.11	0.035868	0.789488	0.800677	sp|C0K3N1|TXVE_BITAR/	16,G,S/	1	RecName: Full=Snake venom vascular endothelial growth factor toxin barietin; Short=svVEGF; AltName: Full=VEGF-F; Flags: Precursor [Bitis arietans]	Bitis arietans	68.1	68.1	1	1e-14	1	150	C0K3N1.1
			VSeo_32c.332.332.3 File:"VSeo_32c.raw", NativeID:"controllerType=0 controllerNumber=1 scan=332"	PLA2	MATYSTSFQNGDIVCGDNDLCLR	10,Deamidated[N];15,Carbamidomethyl[C];18,Deamidated[N];21,Carbamidomethyl[C];	2639.15	3	0.10971	2639.11	0.040986	1.7975	0.80253	sp|P0DKR3|PA2AA_PSEFE/	60,K,A/	0	RecName: Full=Acidic phospholipase A2 CbIalpha; Short=svPLA2; AltName: Full=Phosphatidylcholine 2-acylhydrolase [Pseudocerastes fieldi]	Pseudocerastes fieldi	79.1	79.1	1	3e-18	1	122	P0DKR3.1
			VSeo_32c.347.347.3 File:"VSeo_32c.raw", NativeID:"controllerType=0 controllerNumber=1 scan=347"	PLA2	AVCECDRAAAICLGQNVNTYNK	3,GG[C](Dicarbamidomethyl[C]);5,GG[C](Dicarbamidomethyl[C]);12,maleimide[C];	2681.16	3	0.27124	2681.19	-0.028314	0.92796	0.881133	sp|P0DKR3|PA2AA_PSEFE/	83,R,N/	1	RecName: Full=Acidic phospholipase A2 CbIalpha; Short=svPLA2; AltName: Full=Phosphatidylcholine 2-acylhydrolase [Pseudocerastes fieldi]	Pseudocerastes fieldi	47	47	1	3e-08	1	122	P0DKR3.1
			VSeo_32c.389.389.2 File:"VSeo_32c.raw", NativeID:"controllerType=0 controllerNumber=1 scan=389"	PLA2	STYSYSFQNGGIVCDDQNLCKR	14,GG[C](Dicarbamidomethyl[C]);20,maleimide[C];	2709.14	2	0.38953	2709.17	-0.024295	0.001	0.944788	sp|P21789|PA2A_CERCE/	61,R,A/	1	RecName: Full=Acidic phospholipase A2 Cc1-PLA2; Short=svPLA2; AltName: Full=Phosphatidylcholine 2-acylhydrolase [Cerastes cerastes]	Cerastes cerastes	75.7	75.7	1	4e-17	1	120	P21789.1
			VSeo_32c.140.140.2 File:"VSeo_32c.raw", NativeID:"controllerType=0 controllerNumber=1 scan=140"	PLA2	DYGCFCGKGGHGR	6,GG[C](Dicarbamidomethyl[C]);	1470.61	2	0.38953	1470.6	0.012773	0.002	0.947819	sp|P82896|PA2A5_TRIST/	22,S,P/	1	phospholipase A2 [Trimeresurus cardamomensis]	Trimeresurus cardamomensis	46	46	1	2e-07	1	138	AHJ09588.1
			VSeo_32c.203.203.2 File:"VSeo_32c.raw", NativeID:"controllerType=0 controllerNumber=1 scan=203"	PLA2	LGNKGKPK	3,Deamidated[N];	842.507	2	0.42708	842.509	-0.002746	1.82432	0.95233	sp|P17935|PA2HL_VIPAA/	45,G,D/	2	RecName: Full=Basic phospholipase A2 homolog ammodytin L; Short=AMDL; Short=AtnL; Short=svPLA2 homolog; Flags: Precursor [Vipera ammodytes ammodytes]	Vipera ammodytes ammodytes	26.9	26.9	1	0.53	1	138	P17935.1
			VSeo_32c.379.379.2 File:"VSeo_32c.raw", NativeID:"controllerType=0 controllerNumber=1 scan=379"	PLA2	LSTYSYSFQNGDIVCGDDNACLR	0,Acetyl[ProteinN-term];10,Deamidated[N];15,maleimide[C];21,Carbamidomethyl[C];	2738.17	2	0.42708	2738.13	0.032666	0.004736	0.952516	sp|P24293|PA2A1_ERIMA/	60,K,A/	0	RecName: Full=Acidic phospholipase A2 PLA-1; Short=svPLA2; AltName: Full=Phosphatidylcholine 2-acylhydrolase [Eristicophis macmahoni]	Eristicophis macmahoni	78.3	78.3	1	6e-18	1	121	P24293.1
			VSeo_32d.253.253.2 File:"VSeo_32d.raw", NativeID:"controllerType=0 controllerNumber=1 scan=253"	PLA2	VAAICFGENLNTYDKK	5,Carbamidomethyl[C];	1842.89	2	0	1842.91	-0.013486	16.3889	0.000106399	sp|P34180|PA2N2_VIPAA/sp|F8QN53|PA2A2_VIPRE/	106,R,Y/106,R,Y/	1	RecName: Full=Acidic phospholipase A2 Vur-PL2B; Short=Vur-PL2; Short=svPLA2; AltName: Full=Phosphatidylcholine 2-acylhydrolase; Flags: Precursor [Vipera renardi]	Vipera renardi	36.2	36.2	1	0.0004	1	137	F8QN53.1
			VSeo_32d.276.276.2 File:"VSeo_32d.raw", NativeID:"controllerType=0 controllerNumber=1 scan=276"	PLA2	VAAICFGENLNTYDK	5,Carbamidomethyl[C];	1714.8	2	0	1714.81	-0.011669	17.4059	0.00024637	sp|P34180|PA2N2_VIPAA/sp|F8QN53|PA2A2_VIPRE/	106,R,K/106,R,K/	0	ammodytin I2(A'') isoform [Vipera aspis aspis]	Vipera aspis aspis	52	52	1	3e-09	1	137	CAE47205.1
			VSeo_32d.291.291.2 File:"VSeo_32d.raw", NativeID:"controllerType=0 controllerNumber=1 scan=291"	PLA2	SALLSYSNYGCYCGWGGK	11,Carbamidomethyl[C];13,Carbamidomethyl[C];	2042.86	2	0	2042.87	-0.016567	18.7557	0.000271975	sp|P34180|PA2N2_VIPAA/	31,K,G/	0	ammodytin I2(A) isoform [Vipera aspis aspis]	Vipera aspis aspis	62.6	62.6	1	7e-13	1	68	CAE47206.1
			VSeo_32d.175.175.2 File:"VSeo_32d.raw", NativeID:"controllerType=0 controllerNumber=1 scan=175"	PLA2	CCFVHDCCYGR	1,Carbamidomethyl[C];2,Carbamidomethyl[C];7,Carbamidomethyl[C];8,Carbamidomethyl[C];	1533.54	2	0	1533.55	-0.00949	10.9734	0.00348797	sp|A8CG87|PA2A2_DABRR/sp|P14421|PA2N_GLOHA/sp|P21789|PA2A_CERCE/sp|Q1RP79|PA2B1_VIPBN/sp|P24294|PA2A2_ERIMA/sp|P14420|PA2B_VIPAE/sp|Q10755|PA2B_VIPAZ/sp|P31854|PA2B_VIPBB/sp|P0DKR3|PA2AA_PSEFE/sp|F8QN51|PA2A3_VIPRE/sp|P34180|PA2N2_VIPAA/sp|P0DPS4|PA2B_CERCE/sp|Q8JFG0|PA2B_VIPAP/sp|Q1RP78|PA2B2_VIPBN/sp|F8QN52|PA2A1_VIPRE/sp|A8CG78|PA2A2_DABSI/sp|Q910A0|PA23_ECHCO/sp|F8QN53|PA2A2_VIPRE/sp|P24293|P…	58,R,V/42,R,L/42,R,V/58,R,V/42,R,V/42,R,V/42,R,V/58,R,A/42,R,V/58,R,V/58,R,V/42,R,A/58,R,V/58,R,V/58,R,V/58,R,V/58,R,V/58,R,V/42,R,V/42,R,V/58,R,V/	0	PLA2(IIA)-Aze2 [Azemiops feae]	Azemiops feae	44.3	44.3	1	6e-07	1	151	ABU68548.1
			VSeo_32d.225.225.3 File:"VSeo_32d.raw", NativeID:"controllerType=0 controllerNumber=1 scan=225"	PLA2	AAAICFGENVNTYDKK	5,Carbamidomethyl[C];	1800.85	3	0	1800.86	-0.011045	6.51906	0.00606107	sp|F8QN51|PA2A3_VIPRE/	106,R,Y/	1	RecName: Full=Acidic phospholipase A2 Vur-PL3; Short=svPLA2; AltName: Full=Phosphatidylcholine 2-acylhydrolase; Flags: Precursor [Vipera renardi]	Vipera renardi	54.5	54.5	1	4e-10	1	137	F8QN51.1
			VSeo_32d.240.240.3 File:"VSeo_32d.raw", NativeID:"controllerType=0 controllerNumber=1 scan=240"	VEGF	VRPFLEVHER	0,unknown[196.085 Da][111][ProteinN-term];	1392.73	3	0	1392.74	-0.009099	13.5883	0.00651029	sp|P83942|TXVE_VIPAP/sp|P67863|TXVE_VIPAA/	1,Q,S/25,Q,S/	1	vammin-1' [Vipera ammodytes ammodytes]	Vipera ammodytes ammodytes	36.7	36.7	1	0.0003	1	145	APB93447.1
			VSeo_32d.195.195.3 File:"VSeo_32d.raw", NativeID:"controllerType=0 controllerNumber=1 scan=195"	VEGF	PFLEVHER		1026.53	3	0	1026.54	-0.003116	10.5038	0.00696229	sp|P83942|TXVE_VIPAP/sp|P67863|TXVE_VIPAA/	3,R,S/27,R,S/	0	vammin-1' [Vipera ammodytes ammodytes]	Vipera ammodytes ammodytes	30.3	30.3	1	0.031	1	145	APB93447.1
			VSeo_32d.316.316.2 File:"VSeo_32d.raw", NativeID:"controllerType=0 controllerNumber=1 scan=316"	PLA2	NLYQFGNMIFK	8,Oxidation[M];	1390.67	2	0	1390.68	-0.009057	10.9701	0.00757386	sp|P34180|PA2N2_VIPAA/	16,G,M/	0	ammodytin I2(B) variant [Vipera aspis atra]	Vipera aspis atra	41.8	41.8	1	5e-06	1	137	CAE47230.1
			VSeo_32d.247.247.2 File:"VSeo_32d.raw", NativeID:"controllerType=0 controllerNumber=1 scan=247"	PLA2	AAAICFGENVNTYDK	5,Carbamidomethyl[C];	1672.75	2	0	1672.76	-0.01123	12.0097	0.0130051	sp|F8QN51|PA2A3_VIPRE/	106,R,K/	0	RecName: Full=Acidic phospholipase A2 Vur-PL3; Short=svPLA2; AltName: Full=Phosphatidylcholine 2-acylhydrolase; Flags: Precursor [Vipera renardi]	Vipera renardi	51.5	51.5	1	4e-09	1	137	F8QN51.1
			VSeo_32d.321.321.2 File:"VSeo_32d.raw", NativeID:"controllerType=0 controllerNumber=1 scan=321"	PLA2	LSIYSYSFENGDIVCGGDDPCLR	15,Carbamidomethyl[C];21,Carbamidomethyl[C];	2637.14	2	0	2637.16	-0.023434	7.8438	0.0131121	sp|P34180|PA2N2_VIPAA/	76,K,A/	0	ammodytin I2(B) variant [Vipera aspis atra]	Vipera aspis atra	78.7	78.7	1	4e-18	1	137	CAE47230.1
			VSeo_32d.183.183.2 File:"VSeo_32d.raw", NativeID:"controllerType=0 controllerNumber=1 scan=183"	VEGF	HTVDLQIMR	8,Oxidation[M];	1128.58	2	0	1128.58	-0.006853	6.05678	0.0142231	sp|P83942|TXVE_VIPAP/sp|P67863|TXVE_VIPAA/	61,K,V/85,K,V/	0	vammin-1' [Vipera ammodytes ammodytes]	Vipera ammodytes ammodytes	34.1	34.1	1	0.002	1	145	APB93447.1
			VSeo_32d.73.73.3 File:"VSeo_32d.raw", NativeID:"controllerType=0 controllerNumber=1 scan=73"	VEGF	FTEHTACECRPR	7,Carbamidomethyl[C];9,Carbamidomethyl[C];	1563.67	3	0	1563.68	-0.00762	7.49885	0.0156924	sp|P83942|TXVE_VIPAP/sp|P67863|TXVE_VIPAA/sp|P82475|TXVE2_MACLB/	84,K,R/108,K,R/84,K,R/	1	vammin-1' [Vipera ammodytes ammodytes]	Vipera ammodytes ammodytes	44.8	44.8	1	5e-07	1	145	APB93447.1
			VSeo_32d.41.41.2 File:"VSeo_32d.raw", NativeID:"controllerType=0 controllerNumber=1 scan=41"	PLA2	GKPQDATDR		987.48	2	0	987.485	-0.005385	4.48699	0.017596	sp|A8CG87|PA2A2_DABRR/sp|Q9PWR6|PA2A7_DABPA/sp|Q9YGJ7|PA2A8_DABPA/sp|C0HJC1|PA2_BOTLA/sp|B6CQR5|PA2A2_MACLB/sp|A8CG86|PA2A1_DABRR/sp|Q7T2R1|PA2AA_DABSI/sp|P31854|PA2B_VIPBB/sp|C3W4R6|PA2A1_MACLB/sp|P34180|PA2N2_VIPAA/sp|P81458|PA2B_DABRR/sp|A8CG90|PA2B2_DABRR/sp|B5U6Z2|PA2A_MACLN/sp|Q98996|PA2A_DABPA/sp|A8CG78|PA2A2_DABSI/sp|Q910A0|PA23_ECHCO/	49,K,C/49,K,C/48,K,C/33,R,C/49,K,C/49,Q,C/49,Q,C/49,Q,C/49,K,C/49,K,C/33,K,C/49,K,C/49,K,C/49,K,C/49,K,C/49,K,C/	1	acidic phospholipase A2 [Atheris nitschei]	Atheris nitschei	31.2	31.2	1	0.019	1	139	AJA90799.1
			VSeo_32d.103.103.2 File:"VSeo_32d.raw", NativeID:"controllerType=0 controllerNumber=1 scan=103"	PLA2	NYPSSHCTETEQC	7,Carbamidomethyl[C];13,Carbamidomethyl[C];	1612.59	2	0	1612.6	-0.010902	4.34202	0.0222823	sp|P34180|PA2N2_VIPAA/	124,K,-/	0	ammodytin I2(B) variant [Vipera aspis atra]	Vipera aspis atra	47.7	47.7	1	6e-08	1	137	CAE47230.1
			VSeo_32d.219.219.2 File:"VSeo_32d.raw", NativeID:"controllerType=0 controllerNumber=1 scan=219"	VEGF	HTVDLQIMR		1112.58	2	0	1112.59	-0.004248	6.32683	0.022682	sp|P83942|TXVE_VIPAP/sp|P67863|TXVE_VIPAA/	61,K,V/85,K,V/	0	vammin-1' [Vipera ammodytes ammodytes]	Vipera ammodytes ammodytes	34.1	34.1	1	0.002	1	145	APB93447.1
			VSeo_32d.277.277.2 File:"VSeo_32d.raw", NativeID:"controllerType=0 controllerNumber=1 scan=277"	PLA2	NLFQFGK		853.454	2	0	853.457	-0.002417	5.52123	0.0613908	sp|F8QN51|PA2A3_VIPRE/sp|P0CAS0|PA2A2_CERCE/	16,G,M/16,G,M/	0	RecName: Full=Acidic phospholipase A2 Vur-PL3; Short=svPLA2; AltName: Full=Phosphatidylcholine 2-acylhydrolase; Flags: Precursor [Vipera renardi]	Vipera renardi	26.1	26.1	1	0.85	1	137	F8QN51.1
			VSeo_32d.90.90.2 File:"VSeo_32d.raw", NativeID:"controllerType=0 controllerNumber=1 scan=90"	VEGF	CSGCCTDESLK	1,Carbamidomethyl[C];4,Carbamidomethyl[C];5,Carbamidomethyl[C];	1316.48	2	0	1316.49	-0.010126	2.70182	0.0996491	sp|P83942|TXVE_VIPAP/sp|P67863|TXVE_VIPAA/sp|P82475|TXVE2_MACLB/	44,R,C/68,R,C/44,R,C/	0	vammin-1' [Vipera ammodytes ammodytes]	Vipera ammodytes ammodytes	39.2	39.2	1	4e-05	1	145	APB93447.1
			VSeo_32d.270.270.3 File:"VSeo_32d.raw", NativeID:"controllerType=0 controllerNumber=1 scan=270"	PLA2	KSALLSYSNYGCYCGWGGK	12,Carbamidomethyl[C];14,Carbamidomethyl[C];	2170.96	3	0	2170.97	-0.011744	0.992173	0.128971	sp|P34180|PA2N2_VIPAA/	30,K,G/	1	RecName: Full=Acidic phospholipase A2 Vur-PL3; Short=svPLA2; AltName: Full=Phosphatidylcholine 2-acylhydrolase; Flags: Precursor [Vipera renardi]	Vipera renardi	51.5	51.5	1	4e-09	1	137	F8QN51.1
			VSeo_32d.333.333.2 File:"VSeo_32d.raw", NativeID:"controllerType=0 controllerNumber=1 scan=333"	PLA2	NLYQFGNMIFK	7,Deamidated[N];	1375.66	2	0	1375.67	-0.006948	2.91713	0.141989	sp|P34180|PA2N2_VIPAA/	16,G,M/	0	ammodytin I2(B) variant [Vipera aspis atra]	Vipera aspis atra	41.8	41.8	1	5e-06	1	137	CAE47230.1
			VSeo_32d.286.286.2 File:"VSeo_32d.raw", NativeID:"controllerType=0 controllerNumber=1 scan=286"	PLA2	NLFQFGK		853.453	2	0	853.457	-0.003881	1.01266	0.146268	sp|F8QN51|PA2A3_VIPRE/sp|P0CAS0|PA2A2_CERCE/	16,G,M/16,G,M/	0	RecName: Full=Acidic phospholipase A2 Vur-PL3; Short=svPLA2; AltName: Full=Phosphatidylcholine 2-acylhydrolase; Flags: Precursor [Vipera renardi]	Vipera renardi	26.1	26.1	1	0.85	1	137	F8QN51.1
			VSeo_32d.174.174.3 File:"VSeo_32d.raw", NativeID:"controllerType=0 controllerNumber=1 scan=174"	PLA2	RCCFVHDCCYGR	1,Arg->Asp[R];8,Carbamidomethyl[C];9,Carbamidomethyl[C];	1534.54	3	0	1534.53	0.007834	7.86726	0.214229	sp|A8CG87|PA2A2_DABRR/sp|P14421|PA2N_GLOHA/sp|P21789|PA2A_CERCE/sp|Q1RP79|PA2B1_VIPBN/sp|P24294|PA2A2_ERIMA/sp|P14420|PA2B_VIPAE/sp|Q10755|PA2B_VIPAZ/sp|P31854|PA2B_VIPBB/sp|P0DKR3|PA2AA_PSEFE/sp|F8QN51|PA2A3_VIPRE/sp|P34180|PA2N2_VIPAA/sp|P0DPS4|PA2B_CERCE/sp|Q8JFG0|PA2B_VIPAP/sp|Q1RP78|PA2B2_VIPBN/sp|F8QN52|PA2A1_VIPRE/sp|A8CG78|PA2A2_DABSI/sp|Q910A0|PA23_ECHCO/sp|F8QN53|PA2A2_VIPRE/sp|P24293|P…	57,D,V/41,D,L/41,D,V/57,D,V/41,D,V/41,D,V/41,D,V/57,D,A/41,D,V/57,D,V/57,D,V/41,D,A/57,D,V/57,D,V/57,D,V/57,D,V/57,D,V/57,D,V/41,D,V/41,D,V/57,D,V/	1	PLA2(IIA)-Aze2 [Azemiops feae]	Azemiops feae	47.7	47.7	1	5e-08	1	151	ABU68548.1
			VSeo_32d.136.136.3 File:"VSeo_32d.raw", NativeID:"controllerType=0 controllerNumber=1 scan=136"	PLA2	YVLYSFKECNESDQC	9,Carbamidomethyl[C];10,unknown[2.988 Da](1)[N];15,Carbamidomethyl[C];	1944.77	3	0	1944.79	-0.014113	1.01505	0.223286	sp|P24294|PA2A2_ERIMA/	106,K,-/	1	RecName: Full=Acidic phospholipase A2 Vur-PL3; Short=svPLA2; AltName: Full=Phosphatidylcholine 2-acylhydrolase; Flags: Precursor [Vipera renardi]	Vipera renardi	51.5	51.5	1	4e-09	1	137	F8QN51.1
			VSeo_32d.47.47.2 File:"VSeo_32d.raw", NativeID:"controllerType=0 controllerNumber=1 scan=47"	PLA2	VNGCDPK	2,Deamidated[N];4,Carbamidomethyl[C];	790.334	2	0	790.34	-0.005854	1.97495	0.253336	sp|P20476|PA2A1_TRIGA/sp|Q9PWR6|PA2A7_DABPA/sp|P81479|PA2A4_TRIGA/sp|Q9YGJ7|PA2A8_DABPA/sp|B6CQR5|PA2A2_MACLB/sp|P81480|PA2A3_TRIGA/sp|Q6H3C8|PA2AF_TRIST/sp|Q6H3D0|PA2AA_TRIST/sp|C3W4R6|PA2A1_MACLB/sp|P34180|PA2N2_VIPAA/sp|F8QN52|PA2A1_VIPRE/sp|Q2YHJ5|PA2AB_TRIPE/sp|B5U6Z2|PA2A_MACLN/sp|Q98996|PA2A_DABPA/sp|Q910A0|PA23_ECHCO/sp|F8QN53|PA2A2_VIPRE/sp|P70088|PA2A6_TRIGA/sp|Q910A1|PA2A1_VIPAA/	69,K,K/69,T,L/53,K,K/68,T,L/69,S,L/53,K,K/69,K,D/69,K,K/69,S,L/69,R,L/69,R,M/53,K,D/69,T,L/69,T,L/69,R,M/69,R,L/69,K,D/69,R,M/	0	RecName: Full=Acidic phospholipase A2 VpaPLA2; Short=svPLA2; AltName: Full=Phosphatidylcholine 2-acylhydrolase; Flags: Precursor [Daboia palaestinae]	Daboia palaestinae	26.1	26.1	1	0.8	1	138	Q98996.1
			VSeo_32d.49.49.2 File:"VSeo_32d.raw", NativeID:"controllerType=0 controllerNumber=1 scan=49"	VEGF	CTPVGK	1,Carbamidomethyl[C];	661.332	2	0	661.334	-0.00136	0.859557	0.323733	sp|P67861|TXVE_DABRR/sp|P83942|TXVE_VIPAP/sp|P0DL42|TXVE_DABSI/sp|P67863|TXVE_VIPAA/sp|P82475|TXVE2_MACLB/	79,K,H/55,K,H/55,K,H/79,K,H/55,K,H/	0	vammin-1' [Vipera ammodytes ammodytes]	Vipera ammodytes ammodytes	22.3	22.3	1	14	1	145	APB93447.1
			VSeo_32d.44.44.2 File:"VSeo_32d.raw", NativeID:"controllerType=0 controllerNumber=1 scan=44"	PLA2	QFGNMIFK	4,unknown[2.988 Da](1)[N];	987.479	2	0	987.485	-0.00601	0.002	0.400222	sp|P34180|PA2N2_VIPAA/	19,Y,M/	0	ammodytin I2(B) variant [Vipera aspis atra]	Vipera aspis atra	31.2	31.2	1	0.016	1	137	CAE47230.1
			VSeo_33d.247.247.3 File:"VSeo_33d.raw", NativeID:"controllerType=0 controllerNumber=1 scan=247"	PLA2	VAAICFAGAPYNDKNF	5,Carbamidomethyl[C];14,unknown[196.085 Da][85][K];	1842.89	3	0	1842.88	0.008539	6.87961	0.5	sp|Q7T2Q4|PA2A2_BUNFL/	122,R,M/	1	phospholipase a2 isoform 1 [Bungarus flaviceps]	Bungarus flaviceps	54.9	54.9	1	3e-10	1	147	ADF50035.1
			VSeo_32d.381.381.2 File:"VSeo_32d.raw", NativeID:"controllerType=0 controllerNumber=1 scan=381"	PLA2	NLYQFGNMIFK	0,Acetyl[ProteinN-term];	1416.69	2	0.22175	1416.7	-0.006885	1.01648	0.801971	sp|P34180|PA2N2_VIPAA/	16,G,M/	0	ammodytin I2(B) variant [Vipera aspis atra]	Vipera aspis atra	41.8	41.8	1	5e-06	1	137	CAE47230.1
			VSeo_32d.45.45.3 File:"VSeo_32d.raw", NativeID:"controllerType=0 controllerNumber=1 scan=45"	PLA2	MIFKMTGK	1,Oxidation[M];5,Oxidation[M];	987.483	3	0.26156	987.5	-0.016952	0.001	0.839082	sp|P21789|PA2A_CERCE/sp|P24293|PA2A1_ERIMA/	7,K,S/7,K,S/	1	RecName: Full=Acidic phospholipase A2 PLA-1; Short=svPLA2; AltName: Full=Phosphatidylcholine 2-acylhydrolase [Eristicophis macmahoni]	Eristicophis macmahoni	31.2	31.2	1	0.016	1	121	P24293.1
			VSeo_32d.138.138.3 File:"VSeo_32d.raw", NativeID:"controllerType=0 controllerNumber=1 scan=138"	PLA2	RCCFVHDCCYGK	0,unknown[196.085 Da][111][ProteinN-term];2,Carbamidomethyl[C];3,Carbamidomethyl[C];9,Carbamidomethyl[C];	1715.66	3	0.30622	1715.65	0.009306	0.962128	0.873278	sp|P81478|PA2A2_TRIGA/sp|P0DUN0|PA23_BOTHY/sp|Q9PVF1|PA2AA_CALRH/sp|P86456|PA2A4_BOTAL/sp|Q7ZTA6|PA2AB_CROVV/sp|Q6H3C7|PA2AD_TRIST/sp|P81243|PA2A_BOTJA/sp|P14418|PA2A_GLOHA/sp|P20476|PA2A1_TRIGA/sp|B3EWP6|PA2_LACMR/sp|P81479|PA2A4_TRIGA/sp|O42190|PA2A6_GLOHA/sp|Q9PVF0|PA2AB_CALRH/sp|Q800C1|PA2AH_CROVV/sp|C0HKC4|PA2B1_AGKPC/sp|P51972|PA2B1_AGKPI/sp|Q91506|PA2A1_PROMU/sp|P24027|PA2BA_CRODU/sp|P0062…	41,D,V/37,D,N/44,D,V/40,D,V/57,D,V/57,D,V/41,D,V/41,D,V/57,D,V/41,D,V/41,D,V/41,D,V/44,D,V/57,D,A/41,D,V/41,D,V/41,D,V/57,D,L/57,D,V/41,D,V/57,D,L/41,D,V/57,D,V/57,D,A/57,D,V/57,D,V/41,D,L/41,D,L/57,D,L/33,S,-/41,D,V/41,D,V/41,D,V/41,D,V/57,D,V/41,D,V/41,D,L/41,D,L/24,G,W/57,D,V/57,D,V/57,D,V/57,D,L/40,D,A/57,D,L/57,D,L/57,D,L/57,D,A/57,D,V/57,D,L/41,D,V/41,D,V/42,D,L/57,D,V/41,D,V/57,D,V/57,D,A/…	1	RecName: Full=Phospholipase A2 3; Short=BdsPLA2 III; Short=svPLA2; AltName: Full=Phosphatidylcholine 2-acylhydrolase [Bothrops diporus]	Bothrops diporus	47.3	47.3	1	5e-08	1	45	C0HJP9.1
			VSeo_32d.56.56.3 File:"VSeo_32d.raw", NativeID:"controllerType=0 controllerNumber=1 scan=56"	PLA2	HAVWSYLSYGCYCGWGGQGK	0,unknown[196.085 Da][111][ProteinN-term];11,Carbamidomethyl[C];	2390.01	3	0.30622	2390.01	0.000297	0.001	0.879947	sp|P31854|PA2B_VIPBB/	31,K,P/	0	RecName: Full=Basic phospholipase A2 Pla2Vb; Short=VbbPLA2; Short=svPLA2; AltName: Full=Phosphatidylcholine 2-acylhydrolase; Flags: Precursor [Vipera berus berus]	Vipera berus berus	71.9	71.9	1	6e-16	1	138	P31854.2
			VSeo_32d.80.80.2 File:"VSeo_32d.raw", NativeID:"controllerType=0 controllerNumber=1 scan=80"	PLA2	CCYGRVRGCNPK	0,unknown[196.085 Da][111][ProteinN-term];9,maleimide[C];	1563.67	2	0.57713	1563.66	0.006856	0.001	0.990769	sp|Q1RP79|PA2B1_VIPBN/sp|P14420|PA2B_VIPAE/sp|Q10755|PA2B_VIPAZ/sp|Q8JFG0|PA2B_VIPAP/sp|Q1RP78|PA2B2_VIPBN/	64,D,L/48,D,L/48,D,L/64,D,L/64,D,L/	2	vaspin basic subunit variant [Vipera aspis zinnikeri]	Vipera aspis zinnikeri	44.8	44.8	1	5e-07	1	138	CAE47307.1
			VSeo_33d.217.217.2 File:"VSeo_33d.raw", NativeID:"controllerType=0 controllerNumber=1 scan=217"	NGF	IDTACVCVISR	5,Carbamidomethyl[C];7,Carbamidomethyl[C];	1293.62	2	0	1293.63	-0.009846	14.6846	0.00205175	sp|Q3HXZ1|NGFV1_OXYMI/sp|A6MFL7|NGFV3_DEMVE/sp|Q90W38|NGFV_BOTJR/sp|P34128|NGFV_BUNMU/sp|Q1W7Q6|NGFV_CRYNI/sp|F8RKW5|NGFV_DRYCN/sp|P25428|NGFV_MACLB/sp|Q3I5F4|NGFV_OXYSC/sp|Q2XXL6|NGFV1_AZEFE/sp|Q5YF90|NGFV1_NAJSP/sp|Q3HXY9|NGFV1_PSETE/sp|A6MFL6|NGFV2_DEMVE/sp|A6MFL5|NGFV1_DEMVE/sp|Q3HXZ0|NGFV2_OXYMI/	227,R,K/226,R,K/224,R,K/227,R,K/227,R,K/226,R,K/227,R,K/227,R,K/206,R,I/227,R,K/227,R,K/226,R,K/226,R,K/227,R,K/	0	nerve growth factor 1 [Vipera anatolica senliki]	Vipera anatolica senliki	39.2	39.2	1	4e-05	1	244	QHR82782.1
			VSeo_33d.169.169.3 File:"VSeo_33d.raw", NativeID:"controllerType=0 controllerNumber=1 scan=169"	PLA2	CCFVHDCCYGR	1,Carbamidomethyl[C];2,Carbamidomethyl[C];7,Carbamidomethyl[C];8,Carbamidomethyl[C];	1533.54	3	0	1533.55	-0.010846	10.0462	0.00323931	sp|A8CG87|PA2A2_DABRR/sp|P14421|PA2N_GLOHA/sp|P21789|PA2A_CERCE/sp|Q1RP79|PA2B1_VIPBN/sp|P24294|PA2A2_ERIMA/sp|P14420|PA2B_VIPAE/sp|Q10755|PA2B_VIPAZ/sp|P31854|PA2B_VIPBB/sp|P0DKR3|PA2AA_PSEFE/sp|F8QN51|PA2A3_VIPRE/sp|P34180|PA2N2_VIPAA/sp|P0DPS4|PA2B_CERCE/sp|Q8JFG0|PA2B_VIPAP/sp|Q1RP78|PA2B2_VIPBN/sp|F8QN52|PA2A1_VIPRE/sp|A8CG78|PA2A2_DABSI/sp|Q910A0|PA23_ECHCO/sp|F8QN53|PA2A2_VIPRE/sp|P24293|P…	58,R,V/42,R,L/42,R,V/58,R,V/42,R,V/42,R,V/42,R,V/58,R,A/42,R,V/58,R,V/58,R,V/42,R,A/58,R,V/58,R,V/58,R,V/58,R,V/58,R,V/58,R,V/42,R,V/42,R,V/58,R,V/	0	PLA2(IIA)-Aze2 [Azemiops feae]	Azemiops feae	44.3	44.3	1	6e-07	1	151	ABU68548.1
			VSeo_33d.220.220.3 File:"VSeo_33d.raw", NativeID:"controllerType=0 controllerNumber=1 scan=220"	PLA2	AAAICFGENVNTYDKK	5,Carbamidomethyl[C];	1800.85	3	0	1800.86	-0.013243	7.77834	0.0100024	sp|F8QN51|PA2A3_VIPRE/	106,R,Y/	1	RecName: Full=Acidic phospholipase A2 Vur-PL3; Short=svPLA2; AltName: Full=Phosphatidylcholine 2-acylhydrolase; Flags: Precursor [Vipera renardi]	Vipera renardi	54.5	54.5	1	4e-10	1	137	F8QN51.1
			VSeo_33d.223.223.3 File:"VSeo_33d.raw", NativeID:"controllerType=0 controllerNumber=1 scan=223"	NGF	HWNSYCTTTDTFVR	6,Carbamidomethyl[C];	1787.77	3	0	1787.78	-0.008879	9.0337	0.0121951	sp|P30894|NGFV_DABRR/sp|P25428|NGFV_MACLB/	71,K,A/198,K,A/	0	nerve growth factor 1 [Vipera anatolica senliki]	Vipera anatolica senliki	52.4	52.4	1	2e-09	1	244	QHR82782.1
			VSeo_33d.250.250.3 File:"VSeo_33d.raw", NativeID:"controllerType=0 controllerNumber=1 scan=250"	PLA2	VAAICFGENLNTYDKK	5,Carbamidomethyl[C];	1842.89	3	0	1842.91	-0.01295	6.53431	0.0212471	sp|P34180|PA2N2_VIPAA/sp|F8QN53|PA2A2_VIPRE/	106,R,Y/106,R,Y/	1	RecName: Full=Acidic phospholipase A2 Vur-PL2B; Short=Vur-PL2; Short=svPLA2; AltName: Full=Phosphatidylcholine 2-acylhydrolase; Flags: Precursor [Vipera renardi]	Vipera renardi	36.2	36.2	1	0.0004	1	137	F8QN53.1
			VSeo_33d.238.238.2 File:"VSeo_33d.raw", NativeID:"controllerType=0 controllerNumber=1 scan=238"	NGF	QYFFETK		962.454	2	0	962.462	-0.007926	4.84586	0.0328783	sp|Q3HXY7|NGFV1_NOTSC/sp|Q3HXZ1|NGFV1_OXYMI/sp|Q3HXX7|NGFV2_TROCA/sp|A6MFL7|NGFV3_DEMVE/sp|Q3HXY5|NGFV3_NOTSC/sp|Q3HXY1|NGFV3_PSEAU/sp|Q3HXX6|NGFV3_TROCA/sp|Q3HXX5|NGFV4_TROCA/sp|Q3HXX4|NGFV5_TROCA/sp|B8QCG6|NGFV_AGKCO/sp|Q90W38|NGFV_BOTJR/sp|P34128|NGFV_BUNMU/sp|Q9DEZ9|NGFV_CRODU/sp|Q1W7Q6|NGFV_CRYNI/sp|P30894|NGFV_DABRR/sp|F8RKW5|NGFV_DRYCN/sp|P25428|NGFV_MACLB/sp|Q3I5F4|NGFV_OXYSC/sp|Q3HXY4|NG…	173,K,C/174,K,C/173,K,C/173,K,C/173,K,C/173,K,C/174,K,C/173,K,C/174,K,C/160,K,C/171,K,C/174,K,C/171,K,C/174,K,C/47,K,C/173,K,C/174,R,C/174,K,C/173,K,C/153,K,C/174,K,C/174,K,C/174,K,C/173,K,C/174,K,Y/173,K,C/174,K,C/173,K,C/173,K,C/173,K,C/174,M,C/173,K,C/174,K,C/	0	beta-nerve growth factor [Daboia russelii]	Daboia russelii	27.8	27.8	1	0.19	1	247	ASU45040.1
			VSeo_33d.242.242.2 File:"VSeo_33d.raw", NativeID:"controllerType=0 controllerNumber=1 scan=242"	PLA2	AAAICFGENVNTYDK	5,Carbamidomethyl[C];	1672.75	2	0	1672.76	-0.011718	7.49534	0.0714929	sp|F8QN51|PA2A3_VIPRE/	106,R,K/	0	RecName: Full=Acidic phospholipase A2 Vur-PL3; Short=svPLA2; AltName: Full=Phosphatidylcholine 2-acylhydrolase; Flags: Precursor [Vipera renardi]	Vipera renardi	51.5	51.5	1	4e-09	1	137	F8QN51.1
			VSeo_33d.107.107.2 File:"VSeo_33d.raw", NativeID:"controllerType=0 controllerNumber=1 scan=107"	NGF	NPNPVPSGCR	9,Carbamidomethyl[C];	1097.51	2	0	1097.52	-0.007989	3.82493	0.0756803	sp|Q3HXZ1|NGFV1_OXYMI/sp|A6MFL7|NGFV3_DEMVE/sp|Q3HXY1|NGFV3_PSEAU/sp|Q3HXX6|NGFV3_TROCA/sp|Q3HXX4|NGFV5_TROCA/sp|P34128|NGFV_BUNMU/sp|Q1W7Q6|NGFV_CRYNI/sp|P30894|NGFV_DABRR/sp|F8RKW5|NGFV_DRYCN/sp|Q3I5F4|NGFV_OXYSC/sp|Q3HXY4|NGFV_PSEPO/sp|Q2XXL6|NGFV1_AZEFE/sp|Q3HXY0|NGFV1_HOPST/sp|Q5YF90|NGFV1_NAJSP/sp|Q3HXY9|NGFV1_PSETE/sp|Q3HXY2|NGFV2_PSEAU/sp|Q3HXY8|NGFV2_PSETE/sp|A6MFL6|NGFV2_DEMVE/sp|A6MFL5…	183,R,G/182,K,G/182,R,G/183,R,G/183,R,G/183,R,G/183,R,G/56,K,G/182,R,G/183,R,G/182,R,G/162,R,G/183,R,G/183,R,G/183,R,G/182,R,G/183,R,G/182,K,G/182,K,G/182,R,G/185,P,G/182,K,G/183,R,G/	0	beta-nerve growth factor [Daboia russelii]	Daboia russelii	35.8	35.8	1	0.0005	1	247	ASU45040.1
			VSeo_33d.74.74.2 File:"VSeo_33d.raw", NativeID:"controllerType=0 controllerNumber=1 scan=74"	NGF	CKNPNPVPSGCR	1,Carbamidomethyl[C];11,Carbamidomethyl[C];	1385.63	2	0	1385.64	-0.011641	1.95625	0.111134	sp|A6MFL7|NGFV3_DEMVE/sp|P30894|NGFV_DABRR/sp|A6MFL6|NGFV2_DEMVE/sp|A6MFL5|NGFV1_DEMVE/sp|Q5YF89|NGFV2_NAJSP/	180,K,G/54,K,G/180,K,G/180,K,G/180,K,G/	1	beta-nerve growth factor [Daboia russelii]	Daboia russelii	43.1	43.1	1	2e-06	1	247	ASU45040.1
			VSeo_33d.40.40.2 File:"VSeo_33d.raw", NativeID:"controllerType=0 controllerNumber=1 scan=40"	PLA2	GKPQDATDR		987.484	2	0	987.485	-0.001479	1.98753	0.200286	sp|A8CG87|PA2A2_DABRR/sp|Q9PWR6|PA2A7_DABPA/sp|Q9YGJ7|PA2A8_DABPA/sp|C0HJC1|PA2_BOTLA/sp|B6CQR5|PA2A2_MACLB/sp|A8CG86|PA2A1_DABRR/sp|Q7T2R1|PA2AA_DABSI/sp|P31854|PA2B_VIPBB/sp|C3W4R6|PA2A1_MACLB/sp|P34180|PA2N2_VIPAA/sp|P81458|PA2B_DABRR/sp|A8CG90|PA2B2_DABRR/sp|B5U6Z2|PA2A_MACLN/sp|Q98996|PA2A_DABPA/sp|A8CG78|PA2A2_DABSI/sp|Q910A0|PA23_ECHCO/	49,K,C/49,K,C/48,K,C/33,R,C/49,K,C/49,Q,C/49,Q,C/49,Q,C/49,K,C/49,K,C/33,K,C/49,K,C/49,K,C/49,K,C/49,K,C/49,K,C/	1	acidic phospholipase A2 [Atheris nitschei]	Atheris nitschei	31.2	31.2	1	0.019	1	139	AJA90799.1
			VSeo_33d.102.102.2 File:"VSeo_33d.raw", NativeID:"controllerType=0 controllerNumber=1 scan=102"	PLA2	NYPSSHCTETEQC	7,Carbamidomethyl[C];13,Carbamidomethyl[C];	1612.59	2	0	1612.6	-0.012489	1.0122	0.211994	sp|P34180|PA2N2_VIPAA/	124,K,-/	0	ammodytin I2(B) variant [Vipera aspis atra]	Vipera aspis atra	47.7	47.7	1	6e-08	1	137	CAE47230.1
			VSeo_33d.101.101.2 File:"VSeo_33d.raw", NativeID:"controllerType=0 controllerNumber=1 scan=101"	PLA2	YYSSSHCTETEQC	7,Carbamidomethyl[C];13,Carbamidomethyl[C];	1651.59	2	0	1651.6	-0.013619	3.68252	0.231981	sp|F8QN51|PA2A3_VIPRE/	124,K,-/	0	RecName: Full=Acidic phospholipase A2 Vur-PL3; Short=svPLA2; AltName: Full=Phosphatidylcholine 2-acylhydrolase; Flags: Precursor [Vipera renardi]	Vipera renardi	47.7	47.7	1	6e-08	1	137	F8QN51.1
			VSeo_33d.509.509.14 File:"VSeo_33d.raw", NativeID:"controllerType=0 controllerNumber=1 scan=509"	PLA2	RILWIVAVCLIGVEGNLFQFAKMINGKLGAFSVWNYISYGCYCGWGGQGTPK	0,Acetyl[ProteinN-term];9,Carbamidomethyl[C];35,Deamidated[N];41,Carbamidomethyl[C];43,Carbamidomethyl[C];	5941.91	14	0	5941.95	-0.036667	0.929722	0.269542	sp|Q1RP79|PA2B1_VIPBN/sp|Q8JFG0|PA2B_VIPAP/sp|Q1RP78|PA2B2_VIPBN/	1,M,D/1,M,D/1,M,D/	3	RecName: Full=Basic phospholipase A2 chain HDP-2P; Short=svPLA2; AltName: Full=Heterodimeric neurotoxic phospholipases A2 basic subunit 2; AltName: Full=Phosphatidylcholine 2-acylhydrolase; Flags: Precursor [Vipera berus nikolskii]	Vipera berus nikolskii	109	109	1	5e-32	1	138	Q1RP78.1
			VSeo_33d.431.431.6 File:"VSeo_33d.raw", NativeID:"controllerType=0 controllerNumber=1 scan=431"	PLA2	YMLYSLFDCKEESEQC	9,Carbamidomethyl[C];16,Carbamidomethyl[C];	2101.86	6	0	2101.86	0.000835	0.003155	0.280044	sp|F8QN52|PA2A1_VIPRE/sp|Q910A1|PA2A1_VIPAA/	122,K,-/122,K,-/	1	ammodytin I1(D) isoform [Vipera ammodytes meridionalis]	Vipera ammodytes meridionalis	59.6	59.6	1	7e-12	1	138	CAE47179.1
			VSeo_33d.187.187.2 File:"VSeo_33d.raw", NativeID:"controllerType=0 controllerNumber=1 scan=187"	NGF	ALTMEGNQASWR	4,Oxidation[M];	1379.63	2	0	1379.64	-0.008208	0.97432	0.295898	sp|Q3HXY7|NGFV1_NOTSC/sp|Q3HXZ1|NGFV1_OXYMI/sp|Q3HXX7|NGFV2_TROCA/sp|Q3HXY5|NGFV3_NOTSC/sp|Q3HXY1|NGFV3_PSEAU/sp|Q3HXX5|NGFV4_TROCA/sp|Q3HXX4|NGFV5_TROCA/sp|Q90W38|NGFV_BOTJR/sp|Q9DEZ9|NGFV_CRODU/sp|P25428|NGFV_MACLB/sp|P61898|NGFV_NAJAT/sp|P61899|NGFV_NAJKA/sp|P01140|NGFV_NAJNA/sp|Q3I5F4|NGFV_OXYSC/sp|Q3HXY4|NGFV_PSEPO/sp|Q3HXY2|NGFV2_PSEAU/sp|Q3HXY8|NGFV2_PSETE/sp|Q3HXX9|NGFV2_HOPST/sp|Q3HXY6|N…	213,R,F/212,R,F/213,R,F/213,R,F/211,K,F/213,R,F/212,R,F/209,K,F/209,K,F/212,R,F/86,K,F/86,K,F/86,K,F/212,R,F/211,R,F/211,R,F/212,R,F/214,K,F/213,R,F/211,K,F/211,K,F/212,R,F/	0	nerve growth factor 1 [Vipera anatolica senliki]	Vipera anatolica senliki	43.1	43.1	1	2e-06	1	244	QHR82782.1
			VSeo_33d.297.297.2 File:"VSeo_33d.raw", NativeID:"controllerType=0 controllerNumber=1 scan=297"	PLA2	VAAICFQK		879.468	2	0	879.476	-0.007457	0.91282	0.397504	sp|P31854|PA2B_VIPBB/	106,R,N/	0	RecName: Full=Basic phospholipase A2 Pla2Vb; Short=VbbPLA2; Short=svPLA2; AltName: Full=Phosphatidylcholine 2-acylhydrolase; Flags: Precursor [Vipera berus berus]	Vipera berus berus	29.1	29.1	1	0.088	1	138	P31854.2
			VSeo_33d.433.433.6 File:"VSeo_33d.raw", NativeID:"controllerType=0 controllerNumber=1 scan=433"	PLA2	YMLYSLFDCKEESEQC	9,GG[C](Dicarbamidomethyl[C]);	2101.86	6	0	2101.86	0.004131	0.975499	0.53633	sp|F8QN52|PA2A1_VIPRE/sp|Q910A1|PA2A1_VIPAA/	122,K,-/122,K,-/	1	ammodytin I1(D) isoform [Vipera ammodytes meridionalis]	Vipera ammodytes meridionalis	59.6	59.6	1	7e-12	1	138	CAE47179.1
			VSeo_33e.262.262.2 File:"VSeo_33e.raw", NativeID:"controllerType=0 controllerNumber=1 scan=262"	PLA2	VAAICFGENLNTYDKK	5,Carbamidomethyl[C];	1842.89	2	0	1842.91	-0.014096	18.421	4.78306e-08	sp|P34180|PA2N2_VIPAA/sp|F8QN53|PA2A2_VIPRE/	106,R,Y/106,R,Y/	1	RecName: Full=Acidic phospholipase A2 Vur-PL2B; Short=Vur-PL2; Short=svPLA2; AltName: Full=Phosphatidylcholine 2-acylhydrolase; Flags: Precursor [Vipera renardi]	Vipera renardi	36.2	36.2	1	0.0004	1	137	F8QN53.1
			VSeo_33e.286.286.2 File:"VSeo_33e.raw", NativeID:"controllerType=0 controllerNumber=1 scan=286"	PLA2	VAAICFGENLNTYDK	5,Carbamidomethyl[C];	1714.8	2	0	1714.81	-0.009472	18.5009	7.93419e-08	sp|P34180|PA2N2_VIPAA/sp|F8QN53|PA2A2_VIPRE/	106,R,K/106,R,K/	0	ammodytin I2(A'') isoform [Vipera aspis aspis]	Vipera aspis aspis	52	52	1	3e-09	1	137	CAE47205.1
			VSeo_33e.301.301.2 File:"VSeo_33e.raw", NativeID:"controllerType=0 controllerNumber=1 scan=301"	PLA2	SALLSYSNYGCYCGWGGK	11,Carbamidomethyl[C];13,Carbamidomethyl[C];	2042.86	2	0	2042.87	-0.014003	19.0466	8.28528e-08	sp|P34180|PA2N2_VIPAA/	31,K,G/	0	ammodytin I2(A) isoform [Vipera aspis aspis]	Vipera aspis aspis	62.6	62.6	1	7e-13	1	68	CAE47206.1
			VSeo_33e.232.232.2 File:"VSeo_33e.raw", NativeID:"controllerType=0 controllerNumber=1 scan=232"	PLA2	AAAICFGENVNTYDKK	5,Carbamidomethyl[C];	1800.85	2	0	1800.86	-0.013046	17.6968	1.43749e-07	sp|F8QN51|PA2A3_VIPRE/	106,R,Y/	1	RecName: Full=Acidic phospholipase A2 Vur-PL3; Short=svPLA2; AltName: Full=Phosphatidylcholine 2-acylhydrolase; Flags: Precursor [Vipera renardi]	Vipera renardi	54.5	54.5	1	4e-10	1	137	F8QN51.1
			VSeo_33e.255.255.2 File:"VSeo_33e.raw", NativeID:"controllerType=0 controllerNumber=1 scan=255"	PLA2	AAAICFGENVNTYDK	5,Carbamidomethyl[C];	1672.75	2	0	1672.76	-0.013061	18.0304	3.15755e-07	sp|F8QN51|PA2A3_VIPRE/	106,R,K/	0	RecName: Full=Acidic phospholipase A2 Vur-PL3; Short=svPLA2; AltName: Full=Phosphatidylcholine 2-acylhydrolase; Flags: Precursor [Vipera renardi]	Vipera renardi	51.5	51.5	1	4e-09	1	137	F8QN51.1
			VSeo_33e.333.333.2 File:"VSeo_33e.raw", NativeID:"controllerType=0 controllerNumber=1 scan=333"	PLA2	LSIYSYSFENGDIVCGGDDPCLR	15,Carbamidomethyl[C];21,Carbamidomethyl[C];	2637.14	2	0	2637.16	-0.021725	15.6346	8.6763e-07	sp|P34180|PA2N2_VIPAA/	76,K,A/	0	ammodytin I2(B) variant [Vipera aspis atra]	Vipera aspis atra	78.7	78.7	1	4e-18	1	137	CAE47230.1
			VSeo_33e.358.358.2 File:"VSeo_33e.raw", NativeID:"controllerType=0 controllerNumber=1 scan=358"	PLA2	NLYQFGNMIFK		1374.68	2	0	1374.69	-0.009016	15.6354	7.27398e-06	sp|P34180|PA2N2_VIPAA/	16,G,M/	0	ammodytin I2(B) variant [Vipera aspis atra]	Vipera aspis atra	41.8	41.8	1	5e-06	1	137	CAE47230.1
			VSeo_33e.177.177.3 File:"VSeo_33e.raw", NativeID:"controllerType=0 controllerNumber=1 scan=177"	PLA2	CCFVHDCCYGR	1,Carbamidomethyl[C];2,Carbamidomethyl[C];7,Carbamidomethyl[C];8,Carbamidomethyl[C];	1533.54	3	0	1533.55	-0.005536	14.0826	1.08071e-05	sp|A8CG87|PA2A2_DABRR/sp|P14421|PA2N_GLOHA/sp|P21789|PA2A_CERCE/sp|Q1RP79|PA2B1_VIPBN/sp|P24294|PA2A2_ERIMA/sp|P14420|PA2B_VIPAE/sp|Q10755|PA2B_VIPAZ/sp|P31854|PA2B_VIPBB/sp|P0DKR3|PA2AA_PSEFE/sp|F8QN51|PA2A3_VIPRE/sp|P34180|PA2N2_VIPAA/sp|P0DPS4|PA2B_CERCE/sp|Q8JFG0|PA2B_VIPAP/sp|Q1RP78|PA2B2_VIPBN/sp|F8QN52|PA2A1_VIPRE/sp|A8CG78|PA2A2_DABSI/sp|Q910A0|PA23_ECHCO/sp|F8QN53|PA2A2_VIPRE/sp|P24293|P…	58,R,V/42,R,L/42,R,V/58,R,V/42,R,V/42,R,V/42,R,V/58,R,A/42,R,V/58,R,V/58,R,V/42,R,A/58,R,V/58,R,V/58,R,V/58,R,V/58,R,V/58,R,V/42,R,V/42,R,V/58,R,V/	0	PLA2(IIA)-Aze2 [Azemiops feae]	Azemiops feae	44.3	44.3	1	6e-07	1	151	ABU68548.1
			VSeo_33e.324.324.2 File:"VSeo_33e.raw", NativeID:"controllerType=0 controllerNumber=1 scan=324"	PLA2	NLYQFGNMIFK	8,Oxidation[M];	1390.67	2	0	1390.68	-0.008447	14.4579	1.24846e-05	sp|P34180|PA2N2_VIPAA/	16,G,M/	0	ammodytin I2(B) variant [Vipera aspis atra]	Vipera aspis atra	41.8	41.8	1	5e-06	1	137	CAE47230.1
			VSeo_33e.238.238.2 File:"VSeo_33e.raw", NativeID:"controllerType=0 controllerNumber=1 scan=238"	PLA2	CCFVHDCCYGGV	1,maleimide[C];7,Carbamidomethyl[C];8,Carbamidomethyl[C];	1516.51	2	0	1516.51	0.003024	10.6605	0.000216917	sp|Q02471|PA2B4_DABSI/	58,R,K/	0	RecName: Full=Basic phospholipase A2 RV-4; Short=svPLA2; AltName: Full=F4; AltName: Full=Phosphatidylcholine 2-acylhydrolase; AltName: Full=S2; AltName: Full=Viperotoxin F; AltName: Full=Viperotoxin toxic basic component; Flags: Precursor [Daboia siamensis]	Daboia siamensis	46.4	46.4	1	1e-07	1	138	Q02471.1
			VSeo_33e.99.99.2 File:"VSeo_33e.raw", NativeID:"controllerType=0 controllerNumber=1 scan=99"	PLA2	YYSSSHCTETEQC	7,Carbamidomethyl[C];13,Carbamidomethyl[C];	1651.59	2	0	1651.6	-0.013497	7.78111	0.000356732	sp|F8QN51|PA2A3_VIPRE/	124,K,-/	0	RecName: Full=Acidic phospholipase A2 Vur-PL3; Short=svPLA2; AltName: Full=Phosphatidylcholine 2-acylhydrolase; Flags: Precursor [Vipera renardi]	Vipera renardi	47.7	47.7	1	6e-08	1	137	F8QN51.1
			VSeo_33e.291.291.2 File:"VSeo_33e.raw", NativeID:"controllerType=0 controllerNumber=1 scan=291"	PLA2	NLFQFGK		853.452	2	0	853.457	-0.004797	6.71902	0.000650168	sp|F8QN51|PA2A3_VIPRE/sp|P0CAS0|PA2A2_CERCE/	16,G,M/16,G,M/	0	RecName: Full=Acidic phospholipase A2 Vur-PL3; Short=svPLA2; AltName: Full=Phosphatidylcholine 2-acylhydrolase; Flags: Precursor [Vipera renardi]	Vipera renardi	26.1	26.1	1	0.85	1	137	F8QN51.1
			VSeo_33e.249.249.3 File:"VSeo_33e.raw", NativeID:"controllerType=0 controllerNumber=1 scan=249"	VEGF	VRPFLEVHER	0,unknown[196.085 Da][111][ProteinN-term];	1392.73	3	0	1392.74	-0.003514	13.8226	0.00256505	sp|P83942|TXVE_VIPAP/sp|P67863|TXVE_VIPAA/	1,Q,S/25,Q,S/	1	vammin-1' [Vipera ammodytes ammodytes]	Vipera ammodytes ammodytes	36.7	36.7	1	0.0003	1	145	APB93447.1
			VSeo_33e.228.228.2 File:"VSeo_33e.raw", NativeID:"controllerType=0 controllerNumber=1 scan=228"	VEGF	HTVDLQIMR		1112.58	2	0	1112.59	-0.005957	5.52818	0.00352354	sp|P83942|TXVE_VIPAP/sp|P67863|TXVE_VIPAA/	61,K,V/85,K,V/	0	vammin-1' [Vipera ammodytes ammodytes]	Vipera ammodytes ammodytes	34.1	34.1	1	0.002	1	145	APB93447.1
			VSeo_33e.43.43.2 File:"VSeo_33e.raw", NativeID:"controllerType=0 controllerNumber=1 scan=43"	PLA2	GKPQDATDR		987.481	2	0	987.485	-0.004652	4.61491	0.00506875	sp|A8CG87|PA2A2_DABRR/sp|Q9PWR6|PA2A7_DABPA/sp|Q9YGJ7|PA2A8_DABPA/sp|C0HJC1|PA2_BOTLA/sp|B6CQR5|PA2A2_MACLB/sp|A8CG86|PA2A1_DABRR/sp|Q7T2R1|PA2AA_DABSI/sp|P31854|PA2B_VIPBB/sp|C3W4R6|PA2A1_MACLB/sp|P34180|PA2N2_VIPAA/sp|P81458|PA2B_DABRR/sp|A8CG90|PA2B2_DABRR/sp|B5U6Z2|PA2A_MACLN/sp|Q98996|PA2A_DABPA/sp|A8CG78|PA2A2_DABSI/sp|Q910A0|PA23_ECHCO/	49,K,C/49,K,C/48,K,C/33,R,C/49,K,C/49,Q,C/49,Q,C/49,Q,C/49,K,C/49,K,C/33,K,C/49,K,C/49,K,C/49,K,C/49,K,C/49,K,C/	1	acidic phospholipase A2 [Atheris nitschei]	Atheris nitschei	31.2	31.2	1	0.019	1	139	AJA90799.1
			VSeo_33e.316.316.2 File:"VSeo_33e.raw", NativeID:"controllerType=0 controllerNumber=1 scan=316"	PLA2	NLFQFGK	1,Deamidated[N];	854.437	2	0	854.441	-0.004011	6.66029	0.00593055	sp|F8QN51|PA2A3_VIPRE/sp|P0CAS0|PA2A2_CERCE/	16,G,M/16,G,M/	0	RecName: Full=Acidic phospholipase A2 Vur-PL3; Short=svPLA2; AltName: Full=Phosphatidylcholine 2-acylhydrolase; Flags: Precursor [Vipera renardi]	Vipera renardi	26.1	26.1	1	0.85	1	137	F8QN51.1
			VSeo_33e.279.279.3 File:"VSeo_33e.raw", NativeID:"controllerType=0 controllerNumber=1 scan=279"	PLA2	KSALLSYSNYGCYCGWGGK	12,Carbamidomethyl[C];14,Carbamidomethyl[C];	2170.96	3	0	2170.97	-0.011011	8.36118	0.0104371	sp|P34180|PA2N2_VIPAA/	30,K,G/	1	RecName: Full=Acidic phospholipase A2 Vur-PL3; Short=svPLA2; AltName: Full=Phosphatidylcholine 2-acylhydrolase; Flags: Precursor [Vipera renardi]	Vipera renardi	51.5	51.5	1	4e-09	1	137	F8QN51.1
			VSeo_33e.186.186.2 File:"VSeo_33e.raw", NativeID:"controllerType=0 controllerNumber=1 scan=186"	VEGF	HTVDLQIMR	8,Oxidation[M];	1128.58	2	0	1128.58	-0.002703	4.98526	0.0105286	sp|P83942|TXVE_VIPAP/sp|P67863|TXVE_VIPAA/	61,K,V/85,K,V/	0	vammin-1' [Vipera ammodytes ammodytes]	Vipera ammodytes ammodytes	34.1	34.1	1	0.002	1	145	APB93447.1
			VSeo_33e.100.100.2 File:"VSeo_33e.raw", NativeID:"controllerType=0 controllerNumber=1 scan=100"	PLA2	NYPSSHCTETEQC	7,Carbamidomethyl[C];13,Carbamidomethyl[C];	1612.59	2	0	1612.6	-0.011634	4.94866	0.0311095	sp|P34180|PA2N2_VIPAA/	124,K,-/	0	ammodytin I2(B) variant [Vipera aspis atra]	Vipera aspis atra	47.7	47.7	1	6e-08	1	137	CAE47230.1
			VSeo_33e.115.115.3 File:"VSeo_33e.raw", NativeID:"controllerType=0 controllerNumber=1 scan=115"	PLA2	YKNYPSSHCTETEQC	9,Carbamidomethyl[C];15,Carbamidomethyl[C];	1903.75	3	0	1903.76	-0.00745	2.6944	0.039394	sp|P34180|PA2N2_VIPAA/	122,K,-/	1	ammodytin I2(A') variant [Vipera ammodytes ammodytes]	Vipera ammodytes ammodytes	35.8	35.8	1	0.0006	1	137	CAE47232.1
			VSeo_33e.370.370.2 File:"VSeo_33e.raw", NativeID:"controllerType=0 controllerNumber=1 scan=370"	PLA2	NLYQFGNMIFK	0,Acetyl[ProteinN-term];	1416.69	2	0	1416.7	-0.006641	4.77129	0.0478523	sp|P34180|PA2N2_VIPAA/	16,G,M/	0	ammodytin I2(B) variant [Vipera aspis atra]	Vipera aspis atra	41.8	41.8	1	5e-06	1	137	CAE47230.1
			VSeo_33e.340.340.2 File:"VSeo_33e.raw", NativeID:"controllerType=0 controllerNumber=1 scan=340"	PLA2	LSIYSYSFENGDIVCGGDDPCLR	10,Deamidated[N];15,Carbamidomethyl[C];21,Carbamidomethyl[C];	2638.14	2	0	2638.14	-0.006473	4.11853	0.0602433	sp|P34180|PA2N2_VIPAA/	76,K,A/	0	ammodytin I2(B) variant [Vipera aspis atra]	Vipera aspis atra	78.7	78.7	1	4e-18	1	137	CAE47230.1
			VSeo_33e.46.46.2 File:"VSeo_33e.raw", NativeID:"controllerType=0 controllerNumber=1 scan=46"	PLA2	VNGCDPK	4,Carbamidomethyl[C];	789.353	2	0	789.356	-0.002795	2.85491	0.0999563	sp|P20476|PA2A1_TRIGA/sp|Q9PWR6|PA2A7_DABPA/sp|P81479|PA2A4_TRIGA/sp|Q9YGJ7|PA2A8_DABPA/sp|B6CQR5|PA2A2_MACLB/sp|P81480|PA2A3_TRIGA/sp|Q6H3C8|PA2AF_TRIST/sp|Q6H3D0|PA2AA_TRIST/sp|C3W4R6|PA2A1_MACLB/sp|P34180|PA2N2_VIPAA/sp|F8QN52|PA2A1_VIPRE/sp|Q2YHJ5|PA2AB_TRIPE/sp|B5U6Z2|PA2A_MACLN/sp|Q98996|PA2A_DABPA/sp|Q910A0|PA23_ECHCO/sp|F8QN53|PA2A2_VIPRE/sp|P70088|PA2A6_TRIGA/sp|Q910A1|PA2A1_VIPAA/	69,K,K/69,T,L/53,K,K/68,T,L/69,S,L/53,K,K/69,K,D/69,K,K/69,S,L/69,R,L/69,R,M/53,K,D/69,T,L/69,T,L/69,R,M/69,R,L/69,K,D/69,R,M/	0	RecName: Full=Acidic phospholipase A2 VpaPLA2; Short=svPLA2; AltName: Full=Phosphatidylcholine 2-acylhydrolase; Flags: Precursor [Daboia palaestinae]	Daboia palaestinae	26.1	26.1	1	0.8	1	138	Q98996.1
			VSeo_33e.349.349.2 File:"VSeo_33e.raw", NativeID:"controllerType=0 controllerNumber=1 scan=349"	PLA2	MDTYSYSFLNGDIVCGDDDPCLR	1,Oxidation[M];15,Carbamidomethyl[C];21,Carbamidomethyl[C];	2729.11	2	0	2729.12	-0.008323	1.61793	0.126081	sp|F8QN51|PA2A3_VIPRE/	76,K,A/	0	RecName: Full=Acidic phospholipase A2 Vur-PL3; Short=svPLA2; AltName: Full=Phosphatidylcholine 2-acylhydrolase; Flags: Precursor [Vipera renardi]	Vipera renardi	81.2	81.2	1	6e-19	1	137	F8QN51.1
			VSeo_33e.243.243.3 File:"VSeo_33e.raw", NativeID:"controllerType=0 controllerNumber=1 scan=243"	PLA2	GVEGNLYQFGEMINQK		1826.87	3	0.67793	1826.87	-0.008869	0.007214	0.135005	sp|A8CG87|PA2A2_DABRR/sp|A8CG78|PA2A2_DABSI/	12,I,T/12,I,T/	0	RecName: Full=Acidic phospholipase A2 DsM-a2/DsM-a2'; Short=svPLA2; AltName: Full=Phosphatidylcholine 2-acylhydrolase; Flags: Precursor [Daboia siamensis]	Daboia siamensis	34.7	34.7	1	0.001	1	138	A8CG78.1
			VSeo_33e.226.226.3 File:"VSeo_33e.raw", NativeID:"controllerType=0 controllerNumber=1 scan=226"	PLA2	AAAICFGENVNTYDKKYK	5,Carbamidomethyl[C];	2092.01	3	0	2092.02	-0.00984	1.00727	0.186631	sp|F8QN51|PA2A3_VIPRE/	106,R,Y/	2	RecName: Full=Acidic phospholipase A2 Vur-PL3; Short=svPLA2; AltName: Full=Phosphatidylcholine 2-acylhydrolase; Flags: Precursor [Vipera renardi]	Vipera renardi	39.7	39.7	1	2e-05	1	137	F8QN51.1
			VSeo_33e.174.174.4 File:"VSeo_33e.raw", NativeID:"controllerType=0 controllerNumber=1 scan=174"	PLA2	GKPQDATDRCCFVHDCCYGR	10,Carbamidomethyl[C];11,Carbamidomethyl[C];16,Carbamidomethyl[C];17,Carbamidomethyl[C];	2502	4	0	2502.02	-0.013648	1.31207	0.23225	sp|A8CG87|PA2A2_DABRR/sp|P31854|PA2B_VIPBB/sp|P34180|PA2N2_VIPAA/sp|A8CG78|PA2A2_DABSI/sp|Q910A0|PA23_ECHCO/	49,K,V/49,Q,A/49,K,V/49,K,V/49,K,V/	2	phospholipase A2 precursor [Atheris squamigera]	Atheris squamigera	47.8	47.8	1	2e-08	1	138	AJS19104.1
			VSeo_33e.298.298.2 File:"VSeo_33e.raw", NativeID:"controllerType=0 controllerNumber=1 scan=298"	PLA2	QFGKMIR		879.47	2	0	879.487	-0.017103	0.003	0.335259	sp|F8QN53|PA2A2_VIPRE/	19,Y,Y/	1	PLA2(IIA)-Cau1 [Causus rhombeatus]	Causus rhombeatus	27.4	27.4	1	0.3	1	149	ABU68556.1
			VSeo_33e.321.321.2 File:"VSeo_33e.raw", NativeID:"controllerType=0 controllerNumber=1 scan=321"	PLA2	NLFQFGK	0,Acetyl[ProteinN-term];	895.466	2	0	895.467	-0.000836	1.0159	0.361472	sp|F8QN51|PA2A3_VIPRE/sp|P0CAS0|PA2A2_CERCE/	16,G,M/16,G,M/	0	RecName: Full=Acidic phospholipase A2 Vur-PL3; Short=svPLA2; AltName: Full=Phosphatidylcholine 2-acylhydrolase; Flags: Precursor [Vipera renardi]	Vipera renardi	26.1	26.1	1	0.85	1	137	F8QN51.1
			VSeo_33e.29.29.4 File:"VSeo_33e.raw", NativeID:"controllerType=0 controllerNumber=1 scan=29"	PLA2	VVFPYQGSSIILESGNVNDYEVVYPQKVPSLPK	0,unknown[196.085 Da][111][ProteinN-term];	3776.98	4	0	3776.94	0.037147	0.945517	0.404066	sp|A8QL48|VM3_BUNFA/	2,L,G/	1	RecName: Full=Zinc metalloproteinase-disintegrin-like BfMP; AltName: Full=Snake venom metalloproteinase; Short=SVMP; Flags: Precursor [Bungarus fasciatus]	Bungarus fasciatus	73.6	73.6	1	8e-17	1	605	A8QL48.1
			VSeo_33e.397.397.2 File:"VSeo_33e.raw", NativeID:"controllerType=0 controllerNumber=1 scan=397"	PLA2	YQFGNMIFKMTKK	6,Oxidation[M];	1651.82	2	0.11339	1651.83	-0.010483	0.002	0.675939	sp|P34180|PA2N2_VIPAA/	18,L,S/	2	ammodytin I2(B) variant [Vipera aspis atra]	Vipera aspis atra	49	49	1	2e-08	1	137	CAE47230.1
			VSeo_33e.415.415.2 File:"VSeo_33e.raw", NativeID:"controllerType=0 controllerNumber=1 scan=415"	PLA2	NLYQFGNMIFK	0,Acetyl[ProteinN-term];1,Deamidated[N];	1417.69	2	0.11339	1417.68	0.004338	1.97227	0.711249	sp|P34180|PA2N2_VIPAA/	16,G,M/	0	ammodytin I2(B) variant [Vipera aspis atra]	Vipera aspis atra	41.8	41.8	1	5e-06	1	137	CAE47230.1
			VSeo_33e.330.330.2 File:"VSeo_33e.raw", NativeID:"controllerType=0 controllerNumber=1 scan=330"	PLA2	KGTPVDATDRCCFVHDCCYGR	0,unknown[196.085 Da][111][ProteinN-term];11,Carbamidomethyl[C];12,Carbamidomethyl[C];17,Carbamidomethyl[C];18,Carbamidomethyl[C];	2685.1	2	0.15789	2685.11	-0.004894	0.828908	0.730017	sp|P21789|PA2A_CERCE/sp|P0DPS4|PA2B_CERCE/	32,G,V/32,G,A/	2	RecName: Full=Acidic phospholipase A2 Cc1-PLA2; Short=svPLA2; AltName: Full=Phosphatidylcholine 2-acylhydrolase [Cerastes cerastes]	Cerastes cerastes	48.1	48.1	1	1e-08	1	120	P21789.1
			VSeo_33e.207.207.2 File:"VSeo_33e.raw", NativeID:"controllerType=0 controllerNumber=1 scan=207"	PLA2	KMIKHK	0,Acetyl[ProteinN-term];2,Oxidation[M];	842.507	2	0.4949	842.492	0.015802	0.001	0.96971	sp|P0CAR9|PA2A1_CERCE/sp|P0CAS0|PA2A2_CERCE/	22,G,T/22,G,T/	2	RecName: Full=Acidic phospholipase A2 CC-PLA2-1; Short=svPLA2; AltName: Full=Phosphatidylcholine 2-acylhydrolase; Flags: Precursor [Cerastes cerastes]	Cerastes cerastes	24	24	1	3.6	1	137	P0CAR9.2
			VSeo_33e.132.132.3 File:"VSeo_33e.raw", NativeID:"controllerType=0 controllerNumber=1 scan=132"	PLA2	YKNYPSSHCTETEQC	3,Deamidated[N];9,maleimide[C];15,Carbamidomethyl[C];	1944.77	3	0.4949	1944.74	0.036203	1.02245	0.976537	sp|P34180|PA2N2_VIPAA/	122,K,-/	1	ammodytin I2(A') variant [Vipera ammodytes ammodytes]	Vipera ammodytes ammodytes	35.8	35.8	1	0.0006	1	137	CAE47232.1
			VSeo_33f.250.250.2 File:"VSeo_33f.raw", NativeID:"controllerType=0 controllerNumber=1 scan=250"	PLA2	VAAICFGENLNTYDKK	5,Carbamidomethyl[C];	1842.89	2	0	1842.91	-0.012509	15.2992	8.43661e-08	sp|P34180|PA2N2_VIPAA/sp|F8QN53|PA2A2_VIPRE/	106,R,Y/106,R,Y/	1	RecName: Full=Acidic phospholipase A2 Vur-PL2B; Short=Vur-PL2; Short=svPLA2; AltName: Full=Phosphatidylcholine 2-acylhydrolase; Flags: Precursor [Vipera renardi]	Vipera renardi	36.2	36.2	1	0.0004	1	137	F8QN53.1
			VSeo_33f.219.219.2 File:"VSeo_33f.raw", NativeID:"controllerType=0 controllerNumber=1 scan=219"	PLA2	AAAICFGENVNTYDKK	5,Carbamidomethyl[C];	1800.85	2	0	1800.86	-0.012924	15.8689	3.1302e-07	sp|F8QN51|PA2A3_VIPRE/	106,R,Y/	1	RecName: Full=Acidic phospholipase A2 Vur-PL3; Short=svPLA2; AltName: Full=Phosphatidylcholine 2-acylhydrolase; Flags: Precursor [Vipera renardi]	Vipera renardi	54.5	54.5	1	4e-10	1	137	F8QN51.1
			VSeo_33f.285.285.2 File:"VSeo_33f.raw", NativeID:"controllerType=0 controllerNumber=1 scan=285"	PLA2	SALLSYSNYGCYCGWGGK	11,Carbamidomethyl[C];13,Carbamidomethyl[C];	2042.86	2	0	2042.87	-0.015224	13.1001	5.76264e-07	sp|P34180|PA2N2_VIPAA/	31,K,G/	0	ammodytin I2(A) isoform [Vipera aspis aspis]	Vipera aspis aspis	62.6	62.6	1	7e-13	1	68	CAE47206.1
			VSeo_33f.274.274.2 File:"VSeo_33f.raw", NativeID:"controllerType=0 controllerNumber=1 scan=274"	PLA2	VAAICFGENLNTYDK	5,Carbamidomethyl[C];	1714.8	2	0	1714.81	-0.013134	17.8598	9.66967e-07	sp|P34180|PA2N2_VIPAA/sp|F8QN53|PA2A2_VIPRE/	106,R,K/106,R,K/	0	ammodytin I2(A'') isoform [Vipera aspis aspis]	Vipera aspis aspis	52	52	1	3e-09	1	137	CAE47205.1
			VSeo_33f.243.243.2 File:"VSeo_33f.raw", NativeID:"controllerType=0 controllerNumber=1 scan=243"	PLA2	AAAICFGENVNTYDK	5,Carbamidomethyl[C];	1672.75	2	0	1672.76	-0.014892	16.1244	7.14422e-06	sp|F8QN51|PA2A3_VIPRE/	106,R,K/	0	RecName: Full=Acidic phospholipase A2 Vur-PL3; Short=svPLA2; AltName: Full=Phosphatidylcholine 2-acylhydrolase; Flags: Precursor [Vipera renardi]	Vipera renardi	51.5	51.5	1	4e-09	1	137	F8QN51.1
			VSeo_33f.171.171.3 File:"VSeo_33f.raw", NativeID:"controllerType=0 controllerNumber=1 scan=171"	PLA2	CCFVHDCCYGR	1,Carbamidomethyl[C];2,Carbamidomethyl[C];7,Carbamidomethyl[C];8,Carbamidomethyl[C];	1533.54	3	0	1533.55	-0.012677	14.7967	4.36091e-05	sp|A8CG87|PA2A2_DABRR/sp|P14421|PA2N_GLOHA/sp|P21789|PA2A_CERCE/sp|Q1RP79|PA2B1_VIPBN/sp|P24294|PA2A2_ERIMA/sp|P14420|PA2B_VIPAE/sp|Q10755|PA2B_VIPAZ/sp|P31854|PA2B_VIPBB/sp|P0DKR3|PA2AA_PSEFE/sp|F8QN51|PA2A3_VIPRE/sp|P34180|PA2N2_VIPAA/sp|P0DPS4|PA2B_CERCE/sp|Q8JFG0|PA2B_VIPAP/sp|Q1RP78|PA2B2_VIPBN/sp|F8QN52|PA2A1_VIPRE/sp|A8CG78|PA2A2_DABSI/sp|Q910A0|PA23_ECHCO/sp|F8QN53|PA2A2_VIPRE/sp|P24293|P…	58,R,V/42,R,L/42,R,V/58,R,V/42,R,V/42,R,V/42,R,V/58,R,A/42,R,V/58,R,V/58,R,V/42,R,A/58,R,V/58,R,V/58,R,V/58,R,V/58,R,V/58,R,V/42,R,V/42,R,V/58,R,V/	0	PLA2(IIA)-Aze2 [Azemiops feae]	Azemiops feae	44.3	44.3	1	6e-07	1	151	ABU68548.1
			VSeo_33f.237.237.3 File:"VSeo_33f.raw", NativeID:"controllerType=0 controllerNumber=1 scan=237"	VEGF	QVRPFLEVHER	0,Gln->pyro-Glu[AnyN-termQ];	1392.73	3	0	1392.74	-0.009643	12.3233	0.000621589	sp|P83942|TXVE_VIPAP/sp|P67863|TXVE_VIPAA/	0,-,S/24,G,S/	1	vammin-1' [Vipera ammodytes ammodytes]	Vipera ammodytes ammodytes	40.1	40.1	1	2e-05	1	145	APB93447.1
			VSeo_33f.318.318.2 File:"VSeo_33f.raw", NativeID:"controllerType=0 controllerNumber=1 scan=318"	PLA2	LSIYSYSFENGDIVCGGDDPCLR	15,Carbamidomethyl[C];21,Carbamidomethyl[C];	2637.14	2	0	2637.16	-0.018551	2.48499	0.00303429	sp|P34180|PA2N2_VIPAA/	76,K,A/	0	ammodytin I2(B) variant [Vipera aspis atra]	Vipera aspis atra	78.7	78.7	1	4e-18	1	137	CAE47230.1
			VSeo_33f.310.310.2 File:"VSeo_33f.raw", NativeID:"controllerType=0 controllerNumber=1 scan=310"	PLA2	NLYQFGNMIFK	8,Oxidation[M];	1390.67	2	0	1390.68	-0.010522	12.3662	0.00372762	sp|P34180|PA2N2_VIPAA/	16,G,M/	0	ammodytin I2(B) variant [Vipera aspis atra]	Vipera aspis atra	41.8	41.8	1	5e-06	1	137	CAE47230.1
			VSeo_33f.192.192.3 File:"VSeo_33f.raw", NativeID:"controllerType=0 controllerNumber=1 scan=192"	VEGF	PFLEVHER		1026.53	3	0	1026.54	-0.004398	7.01279	0.00565497	sp|P83942|TXVE_VIPAP/sp|P67863|TXVE_VIPAA/	3,R,S/27,R,S/	0	vammin-1' [Vipera ammodytes ammodytes]	Vipera ammodytes ammodytes	30.3	30.3	1	0.031	1	145	APB93447.1
			VSeo_33f.273.273.2 File:"VSeo_33f.raw", NativeID:"controllerType=0 controllerNumber=1 scan=273"	PLA2	NLFQFGK		853.453	2	0	853.457	-0.003698	5.1384	0.00933588	sp|F8QN51|PA2A3_VIPRE/sp|P0CAS0|PA2A2_CERCE/	16,G,M/16,G,M/	0	RecName: Full=Acidic phospholipase A2 Vur-PL3; Short=svPLA2; AltName: Full=Phosphatidylcholine 2-acylhydrolase; Flags: Precursor [Vipera renardi]	Vipera renardi	26.1	26.1	1	0.85	1	137	F8QN51.1
			VSeo_33f.100.100.2 File:"VSeo_33f.raw", NativeID:"controllerType=0 controllerNumber=1 scan=100"	PLA2	NYPSSHCTETEQC	7,Carbamidomethyl[C];13,Carbamidomethyl[C];	1612.59	2	0	1612.6	-0.010414	3.67614	0.0197402	sp|P34180|PA2N2_VIPAA/	124,K,-/	0	ammodytin I2(B) variant [Vipera aspis atra]	Vipera aspis atra	47.7	47.7	1	6e-08	1	137	CAE47230.1
			VSeo_33f.217.217.2 File:"VSeo_33f.raw", NativeID:"controllerType=0 controllerNumber=1 scan=217"	VEGF	HTVDLQIMR		1112.58	2	0	1112.59	-0.007056	3.78927	0.0332685	sp|P83942|TXVE_VIPAP/sp|P67863|TXVE_VIPAA/	61,K,V/85,K,V/	0	vammin-1' [Vipera ammodytes ammodytes]	Vipera ammodytes ammodytes	34.1	34.1	1	0.002	1	145	APB93447.1
			VSeo_33f.96.96.2 File:"VSeo_33f.raw", NativeID:"controllerType=0 controllerNumber=1 scan=96"	PLA2	YYSSSHCTETEQC	7,Carbamidomethyl[C];13,Carbamidomethyl[C];	1651.59	2	0	1651.6	-0.013497	3.68863	0.0486028	sp|F8QN51|PA2A3_VIPRE/	124,K,-/	0	RecName: Full=Acidic phospholipase A2 Vur-PL3; Short=svPLA2; AltName: Full=Phosphatidylcholine 2-acylhydrolase; Flags: Precursor [Vipera renardi]	Vipera renardi	47.7	47.7	1	6e-08	1	137	F8QN51.1
			VSeo_33f.180.180.2 File:"VSeo_33f.raw", NativeID:"controllerType=0 controllerNumber=1 scan=180"	VEGF	HTVDLQIMR	8,Oxidation[M];	1128.58	2	0	1128.58	-0.006731	1.73072	0.126588	sp|P83942|TXVE_VIPAP/sp|P67863|TXVE_VIPAA/	61,K,V/85,K,V/	0	vammin-1' [Vipera ammodytes ammodytes]	Vipera ammodytes ammodytes	34.1	34.1	1	0.002	1	145	APB93447.1
			VSeo_33f.46.46.2 File:"VSeo_33f.raw", NativeID:"controllerType=0 controllerNumber=1 scan=46"	PLA2	VNGCDPK	2,Deamidated[N];4,Carbamidomethyl[C];	790.335	2	0	790.34	-0.005366	1.97529	0.136445	sp|P20476|PA2A1_TRIGA/sp|Q9PWR6|PA2A7_DABPA/sp|P81479|PA2A4_TRIGA/sp|Q9YGJ7|PA2A8_DABPA/sp|B6CQR5|PA2A2_MACLB/sp|P81480|PA2A3_TRIGA/sp|Q6H3C8|PA2AF_TRIST/sp|Q6H3D0|PA2AA_TRIST/sp|C3W4R6|PA2A1_MACLB/sp|P34180|PA2N2_VIPAA/sp|F8QN52|PA2A1_VIPRE/sp|Q2YHJ5|PA2AB_TRIPE/sp|B5U6Z2|PA2A_MACLN/sp|Q98996|PA2A_DABPA/sp|Q910A0|PA23_ECHCO/sp|F8QN53|PA2A2_VIPRE/sp|P70088|PA2A6_TRIGA/sp|Q910A1|PA2A1_VIPAA/	69,K,K/69,T,L/53,K,K/68,T,L/69,S,L/53,K,K/69,K,D/69,K,K/69,S,L/69,R,L/69,R,M/53,K,D/69,T,L/69,T,L/69,R,M/69,R,L/69,K,D/69,R,M/	0	RecName: Full=Acidic phospholipase A2 VpaPLA2; Short=svPLA2; AltName: Full=Phosphatidylcholine 2-acylhydrolase; Flags: Precursor [Daboia palaestinae]	Daboia palaestinae	26.1	26.1	1	0.8	1	138	Q98996.1
			VSeo_33f.43.43.2 File:"VSeo_33f.raw", NativeID:"controllerType=0 controllerNumber=1 scan=43"	PLA2	GKPQDATDR		987.48	2	0	987.485	-0.005019	1.98781	0.180292	sp|A8CG87|PA2A2_DABRR/sp|Q9PWR6|PA2A7_DABPA/sp|Q9YGJ7|PA2A8_DABPA/sp|C0HJC1|PA2_BOTLA/sp|B6CQR5|PA2A2_MACLB/sp|A8CG86|PA2A1_DABRR/sp|Q7T2R1|PA2AA_DABSI/sp|P31854|PA2B_VIPBB/sp|C3W4R6|PA2A1_MACLB/sp|P34180|PA2N2_VIPAA/sp|P81458|PA2B_DABRR/sp|A8CG90|PA2B2_DABRR/sp|B5U6Z2|PA2A_MACLN/sp|Q98996|PA2A_DABPA/sp|A8CG78|PA2A2_DABSI/sp|Q910A0|PA23_ECHCO/	49,K,C/49,K,C/48,K,C/33,R,C/49,K,C/49,Q,C/49,Q,C/49,Q,C/49,K,C/49,K,C/33,K,C/49,K,C/49,K,C/49,K,C/49,K,C/49,K,C/	1	acidic phospholipase A2 [Atheris nitschei]	Atheris nitschei	31.2	31.2	1	0.019	1	139	AJA90799.1
			VSeo_33f.234.234.3 File:"VSeo_33f.raw", NativeID:"controllerType=0 controllerNumber=1 scan=234"	PLA2	GVEGNLYQFGEMINQK		1826.86	3	0	1826.87	-0.012898	0.017597	0.182543	sp|A8CG87|PA2A2_DABRR/sp|A8CG78|PA2A2_DABSI/	12,I,T/12,I,T/	0	RecName: Full=Acidic phospholipase A2 DsM-a2/DsM-a2'; Short=svPLA2; AltName: Full=Phosphatidylcholine 2-acylhydrolase; Flags: Precursor [Daboia siamensis]	Daboia siamensis	34.7	34.7	1	0.001	1	138	A8CG78.1
			VSeo_33f.31.31.5 File:"VSeo_33f.raw", NativeID:"controllerType=0 controllerNumber=1 scan=31"	PLA2	LTQFGDMINKK	6,Asp->Pro[D];	1276.7	5	0	1276.71	-0.008338	1.35392	0.199662	sp|Q9PWR6|PA2A7_DABPA/sp|B5U6Z2|PA2A_MACLN/sp|Q98996|PA2A_DABPA/	17,H,T/17,H,T/17,H,T/	1	RecName: Full=Acidic phospholipase A2 VpaPLA2; Short=svPLA2; AltName: Full=Phosphatidylcholine 2-acylhydrolase; Flags: Precursor [Daboia palaestinae]	Daboia palaestinae	39.7	39.7	1	3e-05	1	138	Q98996.1
			VSeo_33f.280.280.2 File:"VSeo_33f.raw", NativeID:"controllerType=0 controllerNumber=1 scan=280"	PLA2	GNLFQFGK		910.473	2	0	910.478	-0.004835	1.93714	0.200935	sp|F8QN51|PA2A3_VIPRE/sp|P0CAS0|PA2A2_CERCE/	15,E,M/15,E,M/	0	RecName: Full=Acidic phospholipase A2 Vur-PL3; Short=svPLA2; AltName: Full=Phosphatidylcholine 2-acylhydrolase; Flags: Precursor [Vipera renardi]	Vipera renardi	28.6	28.6	1	0.13	1	137	F8QN51.1
			VSeo_33f.297.297.3 File:"VSeo_33f.raw", NativeID:"controllerType=0 controllerNumber=1 scan=297"	PLA2	QDATDRCCFVHDCCYGSVNGCDPK	0,Propionamide[AnyN-term];5,Asp->Pro[D];12,Asp->Pro[D];14,Carbamidomethyl[C];21,Carbamidomethyl[C];	2785.12	3	0	2785.14	-0.020281	0.886451	0.290159	sp|B6CQR5|PA2A2_MACLB/sp|C3W4R6|PA2A1_MACLB/	52,P,L/52,P,L/	1	RecName: Full=Acidic phospholipase A2 2; Short=Vl-PLA2-2; Short=svPLA2; AltName: Full=Phosphatidylcholine 2-acylhydrolase; Flags: Precursor [Macrovipera lebetina]	Macrovipera lebetina	85.5	85.5	1	2e-20	1	138	B6CQR5.1
			VSeo_33f.334.334.2 File:"VSeo_33f.raw", NativeID:"controllerType=0 controllerNumber=1 scan=334"	PLA2	AVCECDRVAAICFRENMNTYDK	5,Carbamidomethyl[C];12,Carbamidomethyl[C];16,Deamidated[N];17,Oxidation[M];21,Asp->Pro[D];	2664.15	2	0	2664.17	-0.017259	0.007257	0.419918	sp|A8CG87|PA2A2_DABRR/sp|Q7T3T5|PA2AB_DABSI/sp|A8CG78|PA2A2_DABSI/	99,R,K/91,R,K/99,R,K/	2	Structure of Daboiatoxin (heterodimeric PLA2 venom) [Daboia siamensis]	Daboia siamensis	78.7	78.7	1	4e-18	1	122	2H4C_B
			VSeo_33f.343.343.2 File:"VSeo_33f.raw", NativeID:"controllerType=0 controllerNumber=1 scan=343"	pLA2	HLTQFGDMINK	0,glycidamide[AnyN-term];	1390.67	2	0.55246	1390.68	-0.005035	0.002	0.939719	sp|Q9PWR6|PA2A7_DABPA/sp|B5U6Z2|PA2A_MACLN/sp|Q98996|PA2A_DABPA/	16,G,K/16,G,K/16,G,K/	0	RecName: Full=Acidic phospholipase A2 VpaPLA2; Short=svPLA2; AltName: Full=Phosphatidylcholine 2-acylhydrolase; Flags: Precursor [Daboia palaestinae]	Daboia palaestinae	40.5	40.5	1	1e-05	1	138	Q98996.1
			VSeo_33f.331.331.2 File:"VSeo_33f.raw", NativeID:"controllerType=0 controllerNumber=1 scan=331"	PLA2	CCFVHDCCYGRVRGCNPK	0,glycidamide[AnyN-term];6,Asp->Pro[D];	2128.89	2	0.55246	2128.91	-0.022297	0.001	0.964635	sp|Q1RP79|PA2B1_VIPBN/sp|P14420|PA2B_VIPAE/sp|Q10755|PA2B_VIPAZ/sp|Q8JFG0|PA2B_VIPAP/sp|Q1RP78|PA2B2_VIPBN/	58,R,L/42,R,L/42,R,L/58,R,L/58,R,L/	2	vaspin basic subunit variant [Vipera aspis zinnikeri]	Vipera aspis zinnikeri	67.2	67.2	1	2e-14	1	138	CAE47307.1
			VSeo_33f.75.75.9 File:"VSeo_33f.raw", NativeID:"controllerType=0 controllerNumber=1 scan=75"	VEGF	LKCTPVGKHTVDLQIMRVNPR	0,Acetyl[ProteinN-term];3,Carbamidomethyl[C];	2504.36	9	0.58811	2504.36	0.001139	0.946677	0.994311	sp|P83942|TXVE_VIPAP/sp|P67863|TXVE_VIPAA/	53,S,T/77,S,T/	3	vammin-1' [Vipera ammodytes ammodytes]	Vipera ammodytes ammodytes	72.3	72.3	1	6e-16	1	145	APB93447.1
			VSeo_34a.275.275.2 File:"VSeo_34a.raw", NativeID:"controllerType=0 controllerNumber=1 scan=275"	PLA2	VAAICFGENLNTYDK	5,Carbamidomethyl[C];	1714.8	2	0	1714.81	-0.014965	16.8589	0.00261597	sp|P34180|PA2N2_VIPAA/sp|F8QN53|PA2A2_VIPRE/	106,R,K/106,R,K/	0	ammodytin I2(A'') isoform [Vipera aspis aspis]	Vipera aspis aspis	52	52	1	3e-09	1	137	CAE47205.1
			VSeo_34a.173.173.3 File:"VSeo_34a.raw", NativeID:"controllerType=0 controllerNumber=1 scan=173"	PLA2	CCFVHDCCYGR	1,Carbamidomethyl[C];2,Carbamidomethyl[C];7,Carbamidomethyl[C];8,Carbamidomethyl[C];	1533.54	3	0	1533.55	-0.012768	15.3303	0.00424902	sp|A8CG87|PA2A2_DABRR/sp|P14421|PA2N_GLOHA/sp|P21789|PA2A_CERCE/sp|Q1RP79|PA2B1_VIPBN/sp|P24294|PA2A2_ERIMA/sp|P14420|PA2B_VIPAE/sp|Q10755|PA2B_VIPAZ/sp|P31854|PA2B_VIPBB/sp|P0DKR3|PA2AA_PSEFE/sp|F8QN51|PA2A3_VIPRE/sp|P34180|PA2N2_VIPAA/sp|P0DPS4|PA2B_CERCE/sp|Q8JFG0|PA2B_VIPAP/sp|Q1RP78|PA2B2_VIPBN/sp|F8QN52|PA2A1_VIPRE/sp|A8CG78|PA2A2_DABSI/sp|Q910A0|PA23_ECHCO/sp|F8QN53|PA2A2_VIPRE/sp|P24293|P…	58,R,V/42,R,L/42,R,V/58,R,V/42,R,V/42,R,V/42,R,V/58,R,A/42,R,V/58,R,V/58,R,V/42,R,A/58,R,V/58,R,V/58,R,V/58,R,V/58,R,V/58,R,V/42,R,V/42,R,V/58,R,V/	0	PLA2(IIA)-Aze2 [Azemiops feae]	Azemiops feae	44.3	44.3	1	6e-07	1	151	ABU68548.1
			VSeo_34a.287.287.2 File:"VSeo_34a.raw", NativeID:"controllerType=0 controllerNumber=1 scan=287"	PLA2	SALLSYSNYGCYCGWGGK	11,Carbamidomethyl[C];13,Carbamidomethyl[C];	2042.86	2	0	2042.87	-0.014247	13.2174	0.00463497	sp|P34180|PA2N2_VIPAA/	31,K,G/	0	ammodytin I2(A) isoform [Vipera aspis aspis]	Vipera aspis aspis	62.6	62.6	1	7e-13	1	68	CAE47206.1
			VSeo_34a.221.221.3 File:"VSeo_34a.raw", NativeID:"controllerType=0 controllerNumber=1 scan=221"	PLA2	AAAICFGENVNTYDKK	5,Carbamidomethyl[C];	1800.85	3	0	1800.86	-0.011045	7.27475	0.00653978	sp|F8QN51|PA2A3_VIPRE/	106,R,Y/	1	RecName: Full=Acidic phospholipase A2 Vur-PL3; Short=svPLA2; AltName: Full=Phosphatidylcholine 2-acylhydrolase; Flags: Precursor [Vipera renardi]	Vipera renardi	54.5	54.5	1	4e-10	1	137	F8QN51.1
			VSeo_34a.194.194.3 File:"VSeo_34a.raw", NativeID:"controllerType=0 controllerNumber=1 scan=194"	VEGF	PFLEVHER		1026.53	3	0	1026.54	-0.005314	9.91615	0.0100168	sp|P83942|TXVE_VIPAP/sp|P67863|TXVE_VIPAA/	3,R,S/27,R,S/	0	vammin-1' [Vipera ammodytes ammodytes]	Vipera ammodytes ammodytes	30.3	30.3	1	0.031	1	145	APB93447.1
			VSeo_34a.308.308.2 File:"VSeo_34a.raw", NativeID:"controllerType=0 controllerNumber=1 scan=308"	PLA2	NLYQFGNMIFK	8,Oxidation[M];	1390.67	2	0	1390.68	-0.010156	7.24027	0.0143817	sp|P34180|PA2N2_VIPAA/	16,G,M/	0	ammodytin I2(B) variant [Vipera aspis atra]	Vipera aspis atra	41.8	41.8	1	5e-06	1	137	CAE47230.1
			VSeo_34a.245.245.2 File:"VSeo_34a.raw", NativeID:"controllerType=0 controllerNumber=1 scan=245"	PLA2	AAAICFGENVNTYDK	5,Carbamidomethyl[C];	1672.75	2	0	1672.76	-0.012695	7.06199	0.017946	sp|F8QN51|PA2A3_VIPRE/	106,R,K/	0	RecName: Full=Acidic phospholipase A2 Vur-PL3; Short=svPLA2; AltName: Full=Phosphatidylcholine 2-acylhydrolase; Flags: Precursor [Vipera renardi]	Vipera renardi	51.5	51.5	1	4e-09	1	137	F8QN51.1
			VSeo_34a.239.239.3 File:"VSeo_34a.raw", NativeID:"controllerType=0 controllerNumber=1 scan=239"	VEGF	QVRPFLEVHER	0,Gln->pyro-Glu[AnyN-termQ];	1392.73	3	0	1392.74	-0.011474	13.5716	0.018204	sp|P83942|TXVE_VIPAP/sp|P67863|TXVE_VIPAA/	0,-,S/24,G,S/	1	vammin-1' [Vipera ammodytes ammodytes]	Vipera ammodytes ammodytes	40.1	40.1	1	2e-05	1	145	APB93447.1
			VSeo_34a.96.96.2 File:"VSeo_34a.raw", NativeID:"controllerType=0 controllerNumber=1 scan=96"	PLA2	NYPSSHCTETEQC	7,Carbamidomethyl[C];13,Carbamidomethyl[C];	1612.59	2	0	1612.6	-0.011024	3.62407	0.0184167	sp|P34180|PA2N2_VIPAA/	124,K,-/	0	ammodytin I2(B) variant [Vipera aspis atra]	Vipera aspis atra	47.7	47.7	1	6e-08	1	137	CAE47230.1
			VSeo_34a.276.276.2 File:"VSeo_34a.raw", NativeID:"controllerType=0 controllerNumber=1 scan=276"	PLA2	NLFQFGK		853.451	2	0	853.457	-0.005285	4.94727	0.0231454	sp|F8QN51|PA2A3_VIPRE/sp|P0CAS0|PA2A2_CERCE/	16,G,M/16,G,M/	0	RecName: Full=Acidic phospholipase A2 Vur-PL3; Short=svPLA2; AltName: Full=Phosphatidylcholine 2-acylhydrolase; Flags: Precursor [Vipera renardi]	Vipera renardi	26.1	26.1	1	0.85	1	137	F8QN51.1
			VSeo_34a.218.218.2 File:"VSeo_34a.raw", NativeID:"controllerType=0 controllerNumber=1 scan=218"	VEGF	HTVDLQIMR		1112.58	2	0	1112.59	-0.007788	5.60525	0.0252354	sp|P83942|TXVE_VIPAP/sp|P67863|TXVE_VIPAA/	61,K,V/85,K,V/	0	vammin-1' [Vipera ammodytes ammodytes]	Vipera ammodytes ammodytes	34.1	34.1	1	0.002	1	145	APB93447.1
			VSeo_34a.317.317.2 File:"VSeo_34a.raw", NativeID:"controllerType=0 controllerNumber=1 scan=317"	PLA2	LSIYSYSFENGDIVCGGDDPCLR	15,Carbamidomethyl[C];21,Carbamidomethyl[C];	2637.14	2	0	2637.16	-0.022213	1.60679	0.0272994	sp|P34180|PA2N2_VIPAA/	76,K,A/	0	ammodytin I2(B) variant [Vipera aspis atra]	Vipera aspis atra	78.7	78.7	1	4e-18	1	137	CAE47230.1
			VSeo_34a.182.182.2 File:"VSeo_34a.raw", NativeID:"controllerType=0 controllerNumber=1 scan=182"	VEGF	HTVDLQIMR	8,Oxidation[M];	1128.57	2	0	1128.58	-0.011126	7.40824	0.0274109	sp|P83942|TXVE_VIPAP/sp|P67863|TXVE_VIPAA/	61,K,V/85,K,V/	0	vammin-1' [Vipera ammodytes ammodytes]	Vipera ammodytes ammodytes	34.1	34.1	1	0.002	1	145	APB93447.1
			VSeo_34a.99.99.2 File:"VSeo_34a.raw", NativeID:"controllerType=0 controllerNumber=1 scan=99"	PLA2	YYSSSHCTETEQC	7,Carbamidomethyl[C];13,Carbamidomethyl[C];	1651.59	2	0	1651.6	-0.014717	3.65191	0.0365458	sp|F8QN51|PA2A3_VIPRE/	124,K,-/	0	RecName: Full=Acidic phospholipase A2 Vur-PL3; Short=svPLA2; AltName: Full=Phosphatidylcholine 2-acylhydrolase; Flags: Precursor [Vipera renardi]	Vipera renardi	47.7	47.7	1	6e-08	1	137	F8QN51.1
			VSeo_34a.68.68.3 File:"VSeo_34a.raw", NativeID:"controllerType=0 controllerNumber=1 scan=68"	VEGF	FTEHTACECRPR	7,Carbamidomethyl[C];9,Carbamidomethyl[C];	1563.67	3	0	1563.68	-0.009085	7.0595	0.0370733	sp|P83942|TXVE_VIPAP/sp|P67863|TXVE_VIPAA/sp|P82475|TXVE2_MACLB/	84,K,R/108,K,R/84,K,R/	1	vammin-1' [Vipera ammodytes ammodytes]	Vipera ammodytes ammodytes	44.8	44.8	1	5e-07	1	145	APB93447.1
			VSeo_34a.188.188.2 File:"VSeo_34a.raw", NativeID:"controllerType=0 controllerNumber=1 scan=188"	VEGF	PSCVAVLR	3,Carbamidomethyl[C];	901.486	2	0	901.492	-0.006653	2.76613	0.0386843	sp|C0K3N1|TXVE_BITAR/sp|P67861|TXVE_DABRR/sp|P83942|TXVE_VIPAP/sp|P0DL42|TXVE_DABSI/sp|P67863|TXVE_VIPAA/sp|P82475|TXVE2_MACLB/	60,R,C/60,R,C/36,R,C/36,R,C/60,R,C/36,R,C/	0	RecName: Full=Snake venom vascular endothelial growth factor toxin barietin; Short=svVEGF; AltName: Full=VEGF-F; Flags: Precursor [Bitis arietans]	Bitis arietans	28.2	28.2	1	0.18	1	150	C0K3N1.1
			VSeo_34a.92.92.2 File:"VSeo_34a.raw", NativeID:"controllerType=0 controllerNumber=1 scan=92"	VEGF	CSGCCTDESLK	1,Carbamidomethyl[C];4,Carbamidomethyl[C];5,Carbamidomethyl[C];	1316.48	2	0	1316.49	-0.010004	1.94537	0.0823173	sp|P83942|TXVE_VIPAP/sp|P67863|TXVE_VIPAA/sp|P82475|TXVE2_MACLB/	44,R,C/68,R,C/44,R,C/	0	vammin-1' [Vipera ammodytes ammodytes]	Vipera ammodytes ammodytes	39.2	39.2	1	4e-05	1	145	APB93447.1
			VSeo_34a.50.50.2 File:"VSeo_34a.raw", NativeID:"controllerType=0 controllerNumber=1 scan=50"	PLA2	AVCECDR	3,Carbamidomethyl[C];5,Carbamidomethyl[C];	909.352	2	0	909.355	-0.003667	2.88568	0.111679	sp|P0CAR9|PA2A1_CERCE/sp|Q90ZZ9|PA21_ECHCO/sp|A8CG87|PA2A2_DABRR/sp|P04084|PA2HA_VIPAE/sp|Q9PWR6|PA2A7_DABPA/sp|Q9YGJ7|PA2A8_DABPA/sp|P21789|PA2A_CERCE/sp|B6CQR5|PA2A2_MACLB/sp|A4VBF0|PA2H_VIPBN/sp|Q10754|PA2H_VIPAZ/sp|Q8JFG1|PA2H_VIPAP/sp|P0DKR3|PA2AA_PSEFE/sp|Q7T3T5|PA2AB_DABSI/sp|P59170|PA2A4_ECHCS/sp|C3W4R6|PA2A1_MACLB/sp|P34180|PA2N2_VIPAA/sp|P81458|PA2B_DABRR/sp|Q7T3S7|PA2A1_ECHCA/sp|A8CG90…	98,R,V/99,K,E/99,R,V/83,R,A/99,R,V/98,R,V/83,R,V/99,R,V/99,R,A/99,R,A/99,R,A/83,R,A/91,R,V/99,K,E/99,R,V/99,R,V/83,R,V/99,R,E/99,R,V/99,R,V/99,R,V/99,R,V/99,R,V/99,R,V/99,R,V/99,R,V/99,K,E/83,R,V/99,R,V/99,R,V/	0	acidic phospholipase A2 [Echis carinatus]	Echis carinatus	27.4	27.4	1	0.28	1	139	AJA90797.1
			VSeo_34a.43.43.2 File:"VSeo_34a.raw", NativeID:"controllerType=0 controllerNumber=1 scan=43"	PLA2	GKPQDATDR		987.482	2	0	987.485	-0.003127	1.00275	0.128143	sp|A8CG87|PA2A2_DABRR/sp|Q9PWR6|PA2A7_DABPA/sp|Q9YGJ7|PA2A8_DABPA/sp|C0HJC1|PA2_BOTLA/sp|B6CQR5|PA2A2_MACLB/sp|A8CG86|PA2A1_DABRR/sp|Q7T2R1|PA2AA_DABSI/sp|P31854|PA2B_VIPBB/sp|C3W4R6|PA2A1_MACLB/sp|P34180|PA2N2_VIPAA/sp|P81458|PA2B_DABRR/sp|A8CG90|PA2B2_DABRR/sp|B5U6Z2|PA2A_MACLN/sp|Q98996|PA2A_DABPA/sp|A8CG78|PA2A2_DABSI/sp|Q910A0|PA23_ECHCO/	49,K,C/49,K,C/48,K,C/33,R,C/49,K,C/49,Q,C/49,Q,C/49,Q,C/49,K,C/49,K,C/33,K,C/49,K,C/49,K,C/49,K,C/49,K,C/49,K,C/	1	acidic phospholipase A2 [Atheris nitschei]	Atheris nitschei	31.2	31.2	1	0.019	1	139	AJA90799.1
			VSeo_34a.47.47.2 File:"VSeo_34a.raw", NativeID:"controllerType=0 controllerNumber=1 scan=47"	PLA2	VNGCDPK	2,Deamidated[N];4,Carbamidomethyl[C];	790.335	2	0	790.34	-0.005121	1.93618	0.16579	sp|P20476|PA2A1_TRIGA/sp|Q9PWR6|PA2A7_DABPA/sp|P81479|PA2A4_TRIGA/sp|Q9YGJ7|PA2A8_DABPA/sp|B6CQR5|PA2A2_MACLB/sp|P81480|PA2A3_TRIGA/sp|Q6H3C8|PA2AF_TRIST/sp|Q6H3D0|PA2AA_TRIST/sp|C3W4R6|PA2A1_MACLB/sp|P34180|PA2N2_VIPAA/sp|F8QN52|PA2A1_VIPRE/sp|Q2YHJ5|PA2AB_TRIPE/sp|B5U6Z2|PA2A_MACLN/sp|Q98996|PA2A_DABPA/sp|Q910A0|PA23_ECHCO/sp|F8QN53|PA2A2_VIPRE/sp|P70088|PA2A6_TRIGA/sp|Q910A1|PA2A1_VIPAA/	69,K,K/69,T,L/53,K,K/68,T,L/69,S,L/53,K,K/69,K,D/69,K,K/69,S,L/69,R,L/69,R,M/53,K,D/69,T,L/69,T,L/69,R,M/69,R,L/69,K,D/69,R,M/	0	RecName: Full=Acidic phospholipase A2 VpaPLA2; Short=svPLA2; AltName: Full=Phosphatidylcholine 2-acylhydrolase; Flags: Precursor [Daboia palaestinae]	Daboia palaestinae	26.1	26.1	1	0.8	1	138	Q98996.1
			VSeo_34a.48.48.2 File:"VSeo_34a.raw", NativeID:"controllerType=0 controllerNumber=1 scan=48"	VEGF	CTPVGK	1,Carbamidomethyl[C];	661.332	2	0	661.334	-0.002153	0.970386	0.179451	sp|P67861|TXVE_DABRR/sp|P83942|TXVE_VIPAP/sp|P0DL42|TXVE_DABSI/sp|P67863|TXVE_VIPAA/sp|P82475|TXVE2_MACLB/	79,K,H/55,K,H/55,K,H/79,K,H/55,K,H/	0	vammin-1' [Vipera ammodytes ammodytes]	Vipera ammodytes ammodytes	22.3	22.3	1	14	1	145	APB93447.1
			VSeo_34a.213.213.3 File:"VSeo_34a.raw", NativeID:"controllerType=0 controllerNumber=1 scan=213"	PLA2	MIFKMTGK	0,Acetyl[ProteinN-term];8,Amidine[K];	1038.53	3	0.39003	1038.55	-0.01553	0.001	0.999216	sp|P21789|PA2A_CERCE/sp|P24293|PA2A1_ERIMA/	7,K,S/7,K,S/	1	RecName: Full=Acidic phospholipase A2 PLA-1; Short=svPLA2; AltName: Full=Phosphatidylcholine 2-acylhydrolase [Eristicophis macmahoni]	Eristicophis macmahoni	31.2	31.2	1	0.016	1	121	P24293.1
			VSeo_34a.437.437.6 File:"VSeo_34a.raw", NativeID:"controllerType=0 controllerNumber=1 scan=437"	PLA2	KYMLYSIFDCKEESDQC		2101.85	6	0.39003	2101.89	-0.03884	0.003	0.99965	sp|A8CG87|PA2A2_DABRR/sp|Q7T3T5|PA2AB_DABSI/sp|A8CG78|PA2A2_DABSI/	121,K,-/113,K,-/121,K,-/	2	RecName: Full=Acidic phospholipase A2 DsM-a2/DsM-a2'; Short=svPLA2; AltName: Full=Phosphatidylcholine 2-acylhydrolase; Flags: Precursor [Daboia siamensis]	Daboia siamensis	63	63	1	5e-13	1	138	A8CG78.1
			VSeo_34a.333.333.2 File:"VSeo_34a.raw", NativeID:"controllerType=0 controllerNumber=1 scan=333"	PLA2	GKGKPLDATDRCCFVHDCCYGR	12,maleimide[C];19,maleimide[C];	2638.12	2	0.43331	2638.11	0.017815	0.001	0.999943	sp|P24294|PA2A2_ERIMA/sp|F8QN52|PA2A1_VIPRE/sp|P24293|PA2A1_ERIMA/sp|Q910A1|PA2A1_VIPAA/	31,G,V/47,G,V/31,G,V/47,G,V/	3	RecName: Full=Acidic phospholipase A2 PLA-2; Short=svPLA2; AltName: Full=Phosphatidylcholine 2-acylhydrolase [Eristicophis macmahoni]	Eristicophis macmahoni	77.4	77.4	1	1e-17	1	121	P24294.1
			VSeo_35a.265.265.3 File:"VSeo_35a.raw", NativeID:"controllerType=0 controllerNumber=1 scan=265"	CRISP	KPEIQNEIIDLHNSLR		1919.02	3	0	1919.03	-0.014415	14.5312	0.0666037	sp|B7FDI1|CRVP_VIPBE/sp|P0DMT4|CRVP_ECHCO/sp|Q8JI39|CRVP_PROFL/sp|B7FDI0|CRVP_VIPBN/sp|P79845|CRVP_PROMU/sp|Q7ZZN9|CRVP_PROJR/	29,R,R/10,R,R/29,R,R/11,R,R/29,R,R/29,R,R/	1	cysteine-rich venom protein [Protobothrops mucrosquamatus]	Protobothrops mucrosquamatus	55.8	70.8	1	1e-10	1	261	XP_015678374.1
			VSeo_35a.167.167.2 File:"VSeo_35a.raw", NativeID:"controllerType=0 controllerNumber=1 scan=167"	CRISP	SGCAAAYCPSSEYK	3,Carbamidomethyl[C];8,Carbamidomethyl[C];	1550.61	2	0	1550.62	-0.010637	3.84242	0.0743013	sp|B7FDI1|CRVP_VIPBE/sp|B7FDI0|CRVP_VIPBN/	145,R,Y/127,R,Y/	0	RecName: Full=Cysteine-rich venom protein; Short=CRVP; Flags: Precursor [Vipera berus]	Vipera berus	47.7	47.7	1	7e-08	1	239	B7FDI1.1
			VSeo_35a.241.241.2 File:"VSeo_35a.raw", NativeID:"controllerType=0 controllerNumber=1 scan=241"	CRISP	YFYVCQYCPAGNMQGK	5,Carbamidomethyl[C];8,Carbamidomethyl[C];13,Oxidation[M];	2001.82	2	0	2001.83	-0.014011	2.84904	0.0995414	sp|B7FDI1|CRVP_VIPBE/sp|B7FDI0|CRVP_VIPBN/	159,K,T/141,K,T/	0	RecName: Full=Cysteine-rich venom protein; Short=CRVP; Flags: Precursor [Vipera berus]	Vipera berus	60	60	1	5e-12	1	239	B7FDI1.1
			VSeo_35a.229.229.2 File:"VSeo_35a.raw", NativeID:"controllerType=0 controllerNumber=1 scan=229"	CRISP	MEWYPEAAANAER	1,Oxidation[M];	1553.66	2	0	1553.67	-0.011456	5.93029	0.134297	sp|B7FDI1|CRVP_VIPBE/sp|P0DMT4|CRVP_ECHCO/sp|Q8JI39|CRVP_PROFL/sp|B7FDI0|CRVP_VIPBN/sp|Q8JI40|CRVP_GLOBL/sp|P79845|CRVP_PROMU/sp|Q7ZT99|CRVP_CROAT/sp|Q7ZTA0|CRVP_AGKPI/sp|P0DJG8|CRVP_HELAG/sp|Q7ZZN9|CRVP_PROJR/sp|Q2XXQ0|CRVP_ERYPO/	57,K,W/38,R,W/57,K,W/39,K,W/57,K,W/57,K,W/57,K,W/57,K,W/0,-,Y/57,K,W/56,K,W/	0	RecName: Full=Helicopsin [Helicops angulatus]	Helicops angulatus	48.1	48.1	1	6e-09	1	21	P0DJG8.1
			VSeo_35a.289.289.2 File:"VSeo_35a.raw", NativeID:"controllerType=0 controllerNumber=1 scan=289"	CRISP	YFYVCQYCPAGNIIGK	5,Carbamidomethyl[C];8,Carbamidomethyl[C];	1952.89	2	0	1952.9	-0.015164	16.8547	0.137294	sp|P0DMT4|CRVP_ECHCO/sp|Q8JI39|CRVP_PROFL/sp|Q7ZT99|CRVP_CROAT/sp|Q7ZTA0|CRVP_AGKPI/	140,K,T/159,S,T/159,S,T/159,S,I/	0	cysteine-rich venom protein catrin-like [Crotalus tigris]	Crotalus tigris	58.7	58.7	1	1e-11	1	260	XP_039185516.1
			VSeo_35a.148.148.2 File:"VSeo_35a.raw", NativeID:"controllerType=0 controllerNumber=1 scan=148"	CRISP	SVNPTASNMLK	9,Oxidation[M];	1177.58	2	0	1177.59	-0.009311	1.92323	0.167291	sp|B7FDI1|CRVP_VIPBE/sp|Q8JI39|CRVP_PROFL/sp|B7FDI0|CRVP_VIPBN/sp|Q8JI40|CRVP_GLOBL/sp|B0VXV6|CRVP_SISCA/sp|P79845|CRVP_PROMU/sp|F8S0Y4|CRVP_CROAD/sp|Q7ZT99|CRVP_CROAT/sp|Q7ZTA0|CRVP_AGKPI/sp|Q7ZZN9|CRVP_PROJR/	46,R,M/46,R,M/28,R,M/46,R,M/46,R,M/46,R,M/46,R,M/46,R,M/46,R,M/46,R,M/	0	cysteine-rich venom protein [Protobothrops mucrosquamatus]	Protobothrops mucrosquamatus	37.5	37.5	1	0.0002	1	261	XP_015678374.1
			VSeo_35a.176.176.2 File:"VSeo_35a.raw", NativeID:"controllerType=0 controllerNumber=1 scan=176"	CRISP	GGCAAAYCPSSAYK	0,glycidamide[AnyN-term];8,Carbamidomethyl[C];	1492.61	2	0	1492.62	-0.011021	1.93796	0.167952	sp|P0DMT4|CRVP_ECHCO/	126,R,Y/	0	RecName: Full=Cysteine-rich venom protein; Short=CRVP; AltName: Full=ECO_00025 [Echis coloratus]	Echis coloratus	46.9	46.9	1	1e-07	1	220	P0DMT4.1
			VSeo_35a.127.127.2 File:"VSeo_35a.raw", NativeID:"controllerType=0 controllerNumber=1 scan=127"	CRISP	CILSHSPR	1,Carbamidomethyl[C];	969.487	2	0	969.493	-0.006615	6.89796	0.199894	sp|B7FDI1|CRVP_VIPBE/sp|B7FDI0|CRVP_VIPBN/	74,R,D/56,R,D/	0	RecName: Full=Cysteine-rich venom protein; Short=CRVP; Flags: Precursor [Vipera berus]	Vipera berus	29.5	29.5	1	0.061	1	239	B7FDI1.1
			VSeo_35a.196.196.2 File:"VSeo_35a.raw", NativeID:"controllerType=0 controllerNumber=1 scan=196"	CRISP	SVNPTASNMLK		1161.59	2	0	1161.59	-0.006828	1.9224	0.222021	sp|B7FDI1|CRVP_VIPBE/sp|Q8JI39|CRVP_PROFL/sp|B7FDI0|CRVP_VIPBN/sp|Q8JI40|CRVP_GLOBL/sp|B0VXV6|CRVP_SISCA/sp|P79845|CRVP_PROMU/sp|F8S0Y4|CRVP_CROAD/sp|Q7ZT99|CRVP_CROAT/sp|Q7ZTA0|CRVP_AGKPI/sp|Q7ZZN9|CRVP_PROJR/	46,R,M/46,R,M/28,R,M/46,R,M/46,R,M/46,R,M/46,R,M/46,R,M/46,R,M/46,R,M/	0	cysteine-rich venom protein [Protobothrops mucrosquamatus]	Protobothrops mucrosquamatus	37.5	37.5	1	0.0002	1	261	XP_015678374.1
			VSeo_35a.214.214.2 File:"VSeo_35a.raw", NativeID:"controllerType=0 controllerNumber=1 scan=214"	CRISP	CILSHSPR	0,Pyro-carbamidomethyl[AnyN-termC];	952.461	2	0	952.467	-0.006189	9.30385	0.242682	sp|B7FDI1|CRVP_VIPBE/sp|B7FDI0|CRVP_VIPBN/	74,R,D/56,R,D/	0	RecName: Full=Cysteine-rich venom protein; Short=CRVP; Flags: Precursor [Vipera berus]	Vipera berus	29.5	29.5	1	0.061	1	239	B7FDI1.1
			VSeo_35a.139.139.2 File:"VSeo_35a.raw", NativeID:"controllerType=0 controllerNumber=1 scan=139"	CRISP	VIGGIK		586.389	2	0	586.392	-0.003402	2.70348	0.252038	sp|B7FDI1|CRVP_VIPBE/sp|Q8JI39|CRVP_PROFL/sp|B7FDI0|CRVP_VIPBN/sp|P79845|CRVP_PROMU/sp|F8S0Y4|CRVP_CROAD/sp|Q7ZT99|CRVP_CROAT/sp|Q7ZTA0|CRVP_AGKPI/	85,R,C/85,R,C/67,R,C/85,R,C/85,R,C/85,R,C/85,R,C/	0	cysteine-rich venom protein [Protobothrops mucrosquamatus]	Protobothrops mucrosquamatus	21	21	1	41	1	261	XP_015678374.1
			VSeo_35a.34.34.3 File:"VSeo_35a.raw", NativeID:"controllerType=0 controllerNumber=1 scan=34"	CRISP	KPEIQNEIIDLHNSLRRSVNPTASNMLK	0,glycidamide[AnyN-term];13,Deamidated[N];26,Oxidation[M];	3321.66	3	0	3321.72	-0.058992	0.949505	0.274931	sp|B7FDI1|CRVP_VIPBE/sp|Q8JI39|CRVP_PROFL/sp|B7FDI0|CRVP_VIPBN/sp|P79845|CRVP_PROMU/sp|Q7ZZN9|CRVP_PROJR/	29,R,M/29,R,M/11,R,M/29,R,M/29,R,M/	3	cysteine-rich venom protein [Protobothrops mucrosquamatus]	Protobothrops mucrosquamatus	93.5	108	1	7e-23	1	261	XP_015678374.1
			VSeo_35a.151.151.3 File:"VSeo_35a.raw", NativeID:"controllerType=0 controllerNumber=1 scan=151"	CRISP	CGENIYMSPVPIK	0,Pyro-carbamidomethyl[AnyN-termC];1,Carbamidomethyl[C];4,Deamidated[N];7,Oxidation[M];	1564.7	3	0	1564.7	-0.004218	0.006926	0.483821	sp|Q7ZT99|CRVP_CROAT/	91,K,W/	0	RecName: Full=Cysteine-rich venom protein catrin; Short=CRVP; AltName: Full=Catrin-1; AltName: Full=Catrin-2; Flags: Precursor [Crotalus atrox]	Crotalus atrox	47.7	47.7	1	6e-08	1	240	Q7ZT99.1
			VSeo_35a.250.250.2 File:"VSeo_35a.raw", NativeID:"controllerType=0 controllerNumber=1 scan=250"	CRISP	MEWYPEAAANAER	0,Acetyl[ProteinN-term];1,Oxidation[M];	1595.68	2	0	1595.68	0.002393	0.001	0.490292	sp|B7FDI1|CRVP_VIPBE/sp|P0DMT4|CRVP_ECHCO/sp|Q8JI39|CRVP_PROFL/sp|B7FDI0|CRVP_VIPBN/sp|Q8JI40|CRVP_GLOBL/sp|P79845|CRVP_PROMU/sp|Q7ZT99|CRVP_CROAT/sp|Q7ZTA0|CRVP_AGKPI/sp|P0DJG8|CRVP_HELAG/sp|Q7ZZN9|CRVP_PROJR/sp|Q2XXQ0|CRVP_ERYPO/	57,K,W/38,R,W/57,K,W/39,K,W/57,K,W/57,K,W/57,K,W/57,K,W/0,-,Y/57,K,W/56,K,W/	0	RecName: Full=Helicopsin [Helicops angulatus]	Helicops angulatus	48.1	48.1	1	6e-09	1	21	P0DJG8.1
			VSeo_35c.287.287.2 File:"VSeo_35c.raw", NativeID:"controllerType=0 controllerNumber=1 scan=287"	PLA2	SALLSYSNYGCYCGWGGK	11,Carbamidomethyl[C];13,Carbamidomethyl[C];	2042.86	2	0	2042.87	-0.014736	12.9356	0.00423571	sp|P34180|PA2N2_VIPAA/	31,K,G/	0	ammodytin I2(A) isoform [Vipera aspis aspis]	Vipera aspis aspis	62.6	62.6	1	7e-13	1	68	CAE47206.1
			VSeo_35c.275.275.2 File:"VSeo_35c.raw", NativeID:"controllerType=0 controllerNumber=1 scan=275"	PLA2	VAAICFGENLNTYDK	5,Carbamidomethyl[C];	1714.8	2	0	1714.81	-0.012646	15.6235	0.00713622	sp|P34180|PA2N2_VIPAA/sp|F8QN53|PA2A2_VIPRE/	106,R,K/106,R,K/	0	ammodytin I2(A'') isoform [Vipera aspis aspis]	Vipera aspis aspis	52	52	1	3e-09	1	137	CAE47205.1
			VSeo_35c.170.170.3 File:"VSeo_35c.raw", NativeID:"controllerType=0 controllerNumber=1 scan=170"	PLA2	CCFVHDCCYGR	1,Carbamidomethyl[C];2,Carbamidomethyl[C];7,Carbamidomethyl[C];8,Carbamidomethyl[C];	1533.54	3	0	1533.55	-0.009381	12.6231	0.0176218	sp|A8CG87|PA2A2_DABRR/sp|P14421|PA2N_GLOHA/sp|P21789|PA2A_CERCE/sp|Q1RP79|PA2B1_VIPBN/sp|P24294|PA2A2_ERIMA/sp|P14420|PA2B_VIPAE/sp|Q10755|PA2B_VIPAZ/sp|P31854|PA2B_VIPBB/sp|P0DKR3|PA2AA_PSEFE/sp|F8QN51|PA2A3_VIPRE/sp|P34180|PA2N2_VIPAA/sp|P0DPS4|PA2B_CERCE/sp|Q8JFG0|PA2B_VIPAP/sp|Q1RP78|PA2B2_VIPBN/sp|F8QN52|PA2A1_VIPRE/sp|A8CG78|PA2A2_DABSI/sp|Q910A0|PA23_ECHCO/sp|F8QN53|PA2A2_VIPRE/sp|P24293|P…	58,R,V/42,R,L/42,R,V/58,R,V/42,R,V/42,R,V/42,R,V/58,R,A/42,R,V/58,R,V/58,R,V/42,R,A/58,R,V/58,R,V/58,R,V/58,R,V/58,R,V/58,R,V/42,R,V/42,R,V/58,R,V/	0	PLA2(IIA)-Aze2 [Azemiops feae]	Azemiops feae	44.3	44.3	1	6e-07	1	151	ABU68548.1
			VSeo_35c.252.252.2 File:"VSeo_35c.raw", NativeID:"controllerType=0 controllerNumber=1 scan=252"	PLA2	VAAICFGENLNTYDKK	5,Carbamidomethyl[C];	1842.89	2	0	1842.91	-0.01434	9.78553	0.0364733	sp|P34180|PA2N2_VIPAA/sp|F8QN53|PA2A2_VIPRE/	106,R,Y/106,R,Y/	1	RecName: Full=Acidic phospholipase A2 Vur-PL2B; Short=Vur-PL2; Short=svPLA2; AltName: Full=Phosphatidylcholine 2-acylhydrolase; Flags: Precursor [Vipera renardi]	Vipera renardi	36.2	36.2	1	0.0004	1	137	F8QN53.1
			VSeo_35c.212.212.3 File:"VSeo_35c.raw", NativeID:"controllerType=0 controllerNumber=1 scan=212"	PLA2	VAAICFGENMNTYDKK	5,Carbamidomethyl[C];10,Oxidation[M];	1876.84	3	0	1876.86	-0.01525	6.46407	0.0580018	sp|C3W4R6|PA2A1_MACLB/sp|B5U6Z2|PA2A_MACLN/sp|Q98996|PA2A_DABPA/sp|Q910A1|PA2A1_VIPAA/	106,R,Y/106,R,Y/106,R,Y/106,R,Y/	1	RecName: Full=Acidic phospholipase A2 VpaPLA2; Short=svPLA2; AltName: Full=Phosphatidylcholine 2-acylhydrolase; Flags: Precursor [Daboia palaestinae]	Daboia palaestinae	56.6	56.6	1	7e-11	1	138	Q98996.1
			VSeo_35c.221.221.2 File:"VSeo_35c.raw", NativeID:"controllerType=0 controllerNumber=1 scan=221"	PLA2	AAAICFGENVNTYDKK	5,Carbamidomethyl[C];	1800.85	2	0	1800.86	-0.012314	7.10752	0.0628884	sp|F8QN51|PA2A3_VIPRE/	106,R,Y/	1	RecName: Full=Acidic phospholipase A2 Vur-PL3; Short=svPLA2; AltName: Full=Phosphatidylcholine 2-acylhydrolase; Flags: Precursor [Vipera renardi]	Vipera renardi	54.5	54.5	1	4e-10	1	137	F8QN51.1
			VSeo_35c.233.233.2 File:"VSeo_35c.raw", NativeID:"controllerType=0 controllerNumber=1 scan=233"	PLA2	VAAICFGENMNTYDK	5,Carbamidomethyl[C];10,Oxidation[M];	1748.75	2	0	1748.76	-0.012077	6.50268	0.0711591	sp|C3W4R6|PA2A1_MACLB/sp|B5U6Z2|PA2A_MACLN/sp|Q98996|PA2A_DABPA/sp|Q910A1|PA2A1_VIPAA/	106,R,K/106,R,K/106,R,K/106,R,K/	0	RecName: Full=Acidic phospholipase A2 VpaPLA2; Short=svPLA2; AltName: Full=Phosphatidylcholine 2-acylhydrolase; Flags: Precursor [Daboia palaestinae]	Daboia palaestinae	53.7	53.7	1	7e-10	1	138	Q98996.1
			VSeo_35c.192.192.2 File:"VSeo_35c.raw", NativeID:"controllerType=0 controllerNumber=1 scan=192"	VEGF	PFLEVHER		1026.53	2	0	1026.54	-0.006216	6.20907	0.0828971	sp|P83942|TXVE_VIPAP/sp|P67863|TXVE_VIPAA/	3,R,S/27,R,S/	0	vammin-1' [Vipera ammodytes ammodytes]	Vipera ammodytes ammodytes	30.3	30.3	1	0.031	1	145	APB93447.1
			VSeo_35c.245.245.2 File:"VSeo_35c.raw", NativeID:"controllerType=0 controllerNumber=1 scan=245"	PLA2	AAAICFGENVNTYDK	5,Carbamidomethyl[C];	1672.75	2	0	1672.76	-0.01123	7.25277	0.096584	sp|F8QN51|PA2A3_VIPRE/	106,R,K/	0	RecName: Full=Acidic phospholipase A2 Vur-PL3; Short=svPLA2; AltName: Full=Phosphatidylcholine 2-acylhydrolase; Flags: Precursor [Vipera renardi]	Vipera renardi	51.5	51.5	1	4e-09	1	137	F8QN51.1
			VSeo_35c.338.338.2 File:"VSeo_35c.raw", NativeID:"controllerType=0 controllerNumber=1 scan=338"	PLA2	NLYQFGNMIFK		1374.68	2	0	1374.69	-0.009748	12.9139	0.107441	sp|P34180|PA2N2_VIPAA/	16,G,M/	0	ammodytin I2(B) variant [Vipera aspis atra]	Vipera aspis atra	41.8	41.8	1	5e-06	1	137	CAE47230.1
			VSeo_35c.218.218.2 File:"VSeo_35c.raw", NativeID:"controllerType=0 controllerNumber=1 scan=218"	VEGF	HTVDLQIMR		1112.58	2	0	1112.59	-0.007178	5.60964	0.11133	sp|P83942|TXVE_VIPAP/sp|P67863|TXVE_VIPAA/	61,K,V/85,K,V/	0	vammin-1' [Vipera ammodytes ammodytes]	Vipera ammodytes ammodytes	34.1	34.1	1	0.002	1	145	APB93447.1
			VSeo_35c.197.197.3 File:"VSeo_35c.raw", NativeID:"controllerType=0 controllerNumber=1 scan=197"	PLA2	HLSQFGDMINKK		1417.72	3	0	1417.73	-0.009633	7.14862	0.115194	sp|Q910A1|PA2A1_VIPAA/	16,G,T/	1	ammodytin I1(A) variant [Vipera ammodytes ammodytes]	Vipera ammodytes ammodytes	30.8	30.8	1	0.034	1	132	CAE47176.1
			VSeo_35c.182.182.2 File:"VSeo_35c.raw", NativeID:"controllerType=0 controllerNumber=1 scan=182"	VEGF	HTVDLQIMR	8,Oxidation[M];	1128.58	2	0	1128.58	-0.00722	5.04706	0.125617	sp|P83942|TXVE_VIPAP/sp|P67863|TXVE_VIPAA/	61,K,V/85,K,V/	0	vammin-1' [Vipera ammodytes ammodytes]	Vipera ammodytes ammodytes	34.1	34.1	1	0.002	1	145	APB93447.1
			VSeo_35c.239.239.3 File:"VSeo_35c.raw", NativeID:"controllerType=0 controllerNumber=1 scan=239"	VEGF	QVRPFLEVHER	0,Gln->pyro-Glu[AnyN-termQ];	1392.73	3	0	1392.74	-0.012389	9.95471	0.14331	sp|P83942|TXVE_VIPAP/sp|P67863|TXVE_VIPAA/	0,-,S/24,G,S/	1	vammin-1' [Vipera ammodytes ammodytes]	Vipera ammodytes ammodytes	40.1	40.1	1	2e-05	1	145	APB93447.1
			VSeo_35c.305.305.2 File:"VSeo_35c.raw", NativeID:"controllerType=0 controllerNumber=1 scan=305"	PLA2	YMLYSLFDCKEESEQC	2,Oxidation[M];9,Carbamidomethyl[C];16,Carbamidomethyl[C];	2117.83	2	0	2117.85	-0.015939	5.08662	0.149296	sp|F8QN52|PA2A1_VIPRE/sp|Q910A1|PA2A1_VIPAA/	122,K,-/122,K,-/	1	ammodytin I1(D) isoform [Vipera ammodytes meridionalis]	Vipera ammodytes meridionalis	59.6	59.6	1	7e-12	1	138	CAE47179.1
			VSeo_35c.311.311.2 File:"VSeo_35c.raw", NativeID:"controllerType=0 controllerNumber=1 scan=311"	PLA2	NLYQFGNMIFK	8,Oxidation[M];	1390.67	2	0	1390.68	-0.011499	8.78138	0.155408	sp|P34180|PA2N2_VIPAA/	16,G,M/	0	ammodytin I2(B) variant [Vipera aspis atra]	Vipera aspis atra	41.8	41.8	1	5e-06	1	137	CAE47230.1
			VSeo_35c.100.100.2 File:"VSeo_35c.raw", NativeID:"controllerType=0 controllerNumber=1 scan=100"	PLA2	NYPSSHCTETEQC	7,Carbamidomethyl[C];13,Carbamidomethyl[C];	1612.59	2	0	1612.6	-0.010658	1.82457	0.198215	sp|P34180|PA2N2_VIPAA/	124,K,-/	0	ammodytin I2(B) variant [Vipera aspis atra]	Vipera aspis atra	47.7	47.7	1	6e-08	1	137	CAE47230.1
			VSeo_35c.40.40.2 File:"VSeo_35c.raw", NativeID:"controllerType=0 controllerNumber=1 scan=40"	PLA2	GKPQDATDR		987.479	2	0	987.485	-0.0063	3.18144	0.202371	sp|A8CG87|PA2A2_DABRR/sp|Q9PWR6|PA2A7_DABPA/sp|Q9YGJ7|PA2A8_DABPA/sp|C0HJC1|PA2_BOTLA/sp|B6CQR5|PA2A2_MACLB/sp|A8CG86|PA2A1_DABRR/sp|Q7T2R1|PA2AA_DABSI/sp|P31854|PA2B_VIPBB/sp|C3W4R6|PA2A1_MACLB/sp|P34180|PA2N2_VIPAA/sp|P81458|PA2B_DABRR/sp|A8CG90|PA2B2_DABRR/sp|B5U6Z2|PA2A_MACLN/sp|Q98996|PA2A_DABPA/sp|A8CG78|PA2A2_DABSI/sp|Q910A0|PA23_ECHCO/	49,K,C/49,K,C/48,K,C/33,R,C/49,K,C/49,Q,C/49,Q,C/49,Q,C/49,K,C/49,K,C/33,K,C/49,K,C/49,K,C/49,K,C/49,K,C/49,K,C/	1	acidic phospholipase A2 [Atheris nitschei]	Atheris nitschei	31.2	31.2	1	0.019	1	139	AJA90799.1
			VSeo_35c.49.49.2 File:"VSeo_35c.raw", NativeID:"controllerType=0 controllerNumber=1 scan=49"	PLA2	AVCECDR	3,Carbamidomethyl[C];5,Carbamidomethyl[C];	909.35	2	0	909.355	-0.005681	1.89542	0.217278	sp|P0CAR9|PA2A1_CERCE/sp|Q90ZZ9|PA21_ECHCO/sp|A8CG87|PA2A2_DABRR/sp|P04084|PA2HA_VIPAE/sp|Q9PWR6|PA2A7_DABPA/sp|Q9YGJ7|PA2A8_DABPA/sp|P21789|PA2A_CERCE/sp|B6CQR5|PA2A2_MACLB/sp|A4VBF0|PA2H_VIPBN/sp|Q10754|PA2H_VIPAZ/sp|Q8JFG1|PA2H_VIPAP/sp|P0DKR3|PA2AA_PSEFE/sp|Q7T3T5|PA2AB_DABSI/sp|P59170|PA2A4_ECHCS/sp|C3W4R6|PA2A1_MACLB/sp|P34180|PA2N2_VIPAA/sp|P81458|PA2B_DABRR/sp|Q7T3S7|PA2A1_ECHCA/sp|A8CG90…	98,R,V/99,K,E/99,R,V/83,R,A/99,R,V/98,R,V/83,R,V/99,R,V/99,R,A/99,R,A/99,R,A/83,R,A/91,R,V/99,K,E/99,R,V/99,R,V/83,R,V/99,R,E/99,R,V/99,R,V/99,R,V/99,R,V/99,R,V/99,R,V/99,R,V/99,R,V/99,K,E/83,R,V/99,R,V/99,R,V/	0	acidic phospholipase A2 [Echis carinatus]	Echis carinatus	27.4	27.4	1	0.28	1	139	AJA90797.1
			VSeo_35c.276.276.2 File:"VSeo_35c.raw", NativeID:"controllerType=0 controllerNumber=1 scan=276"	PLA2	NLFQFGK		853.453	2	0	853.457	-0.004065	4.84486	0.245642	sp|F8QN51|PA2A3_VIPRE/sp|P0CAS0|PA2A2_CERCE/	16,G,M/16,G,M/	0	RecName: Full=Acidic phospholipase A2 Vur-PL3; Short=svPLA2; AltName: Full=Phosphatidylcholine 2-acylhydrolase; Flags: Precursor [Vipera renardi]	Vipera renardi	26.1	26.1	1	0.85	1	137	F8QN51.1
			VSeo_35c.152.152.3 File:"VSeo_35c.raw", NativeID:"controllerType=0 controllerNumber=1 scan=152"	PLA2	HLSQFGDMINKK	8,Oxidation[M];	1433.71	3	0	1433.72	-0.010834	4.2989	0.248125	sp|Q910A1|PA2A1_VIPAA/	16,G,T/	1	ammodytin I1(A) variant [Vipera ammodytes ammodytes]	Vipera ammodytes ammodytes	30.8	30.8	1	0.034	1	132	CAE47176.1
			VSeo_35c.219.219.2 File:"VSeo_35c.raw", NativeID:"controllerType=0 controllerNumber=1 scan=219"	PLA2	HLSQFGDMINK		1289.62	2	0	1289.63	-0.008994	1.00908	0.259433	sp|Q910A1|PA2A1_VIPAA/	16,G,K/	0	ammodytin I1(E) isoform [Vipera aspis aspis]	Vipera aspis aspis	40.1	40.1	1	2e-05	1	138	CAE47133.1
			VSeo_35c.65.65.2 File:"VSeo_35c.raw", NativeID:"controllerType=0 controllerNumber=1 scan=65"	PLA2	GKPLDATDR		972.505	2	0	972.511	-0.005846	1.9323	0.269862	sp|P24294|PA2A2_ERIMA/sp|F8QN52|PA2A1_VIPRE/sp|P00620|PA2A_BITGA/sp|P24293|PA2A1_ERIMA/sp|Q910A1|PA2A1_VIPAA/	33,K,C/49,K,C/31,K,C/33,K,C/49,K,C/	1	ammodytin I1(E) isoform [Vipera aspis aspis]	Vipera aspis aspis	30.8	30.8	1	0.027	1	138	CAE47133.1
			VSeo_35c.335.335.2 File:"VSeo_35c.raw", NativeID:"controllerType=0 controllerNumber=1 scan=335"	PLA2	YMLYSIFDCK	9,Carbamidomethyl[C];	1339.6	2	0	1339.61	-0.009692	1.00812	0.296083	sp|A8CG87|PA2A2_DABRR/sp|B6CQR5|PA2A2_MACLB/sp|Q7T3T5|PA2AB_DABSI/sp|C3W4R6|PA2A1_MACLB/sp|F8QN52|PA2A1_VIPRE/sp|A8CG78|PA2A2_DABSI/sp|Q910A1|PA2A1_VIPAA/	122,K,E/122,K,E/114,K,E/122,K,E/122,K,E/122,K,E/122,K,E/	0	RecName: Full=Acidic phospholipase A2 DsM-a2/DsM-a2'; Short=svPLA2; AltName: Full=Phosphatidylcholine 2-acylhydrolase; Flags: Precursor [Daboia siamensis]	Daboia siamensis	39.7	39.7	1	2e-05	1	138	A8CG78.1
			VSeo_35c.317.317.2 File:"VSeo_35c.raw", NativeID:"controllerType=0 controllerNumber=1 scan=317"	PLA2	NYKFLSSSRCR	10,Carbamidomethyl[C];	1417.69	2	0	1417.7	-0.014347	0.002	0.299753	sp|Q1RP79|PA2B1_VIPBN/sp|P14420|PA2B_VIPAE/	121,K,Q/105,K,Q/	2	RecName: Full=Basic phospholipase A2 chain HDP-1P; Short=svPLA2; AltName: Full=Heterodimeric neurotoxic phospholipases A2 basic subunit 1; AltName: Full=Phosphatidylcholine 2-acylhydrolase; Flags: Precursor [Vipera berus nikolskii]	Vipera berus nikolskii	39.2	39.2	1	4e-05	1	138	Q1RP79.1
			VSeo_35c.266.266.3 File:"VSeo_35c.raw", NativeID:"controllerType=0 controllerNumber=1 scan=266"	PLA2	GVEGNLYQFGKMIRYK	12,Oxidation[M];	1919.02	3	0.019492	1918.98	0.036983	0.002	0.305523	sp|F8QN53|PA2A2_VIPRE/	12,I,T/	2	RecName: Full=Acidic phospholipase A2 Vur-PL2B; Short=Vur-PL2; Short=svPLA2; AltName: Full=Phosphatidylcholine 2-acylhydrolase; Flags: Precursor [Vipera renardi]	Vipera renardi	56.6	56.6	1	8e-11	1	137	F8QN53.1
			VSeo_35c.70.70.3 File:"VSeo_35c.raw", NativeID:"controllerType=0 controllerNumber=1 scan=70"	VEGF	FTEHTACECRPR	7,Carbamidomethyl[C];9,Carbamidomethyl[C];	1563.67	3	0.020339	1563.68	-0.006887	2.88785	0.370916	sp|P83942|TXVE_VIPAP/sp|P67863|TXVE_VIPAA/sp|P82475|TXVE2_MACLB/	84,K,R/108,K,R/84,K,R/	1	vammin-1' [Vipera ammodytes ammodytes]	Vipera ammodytes ammodytes	44.8	44.8	1	5e-07	1	145	APB93447.1
			VSeo_35c.279.279.2 File:"VSeo_35c.raw", NativeID:"controllerType=0 controllerNumber=1 scan=279"	PLA2	NLFQFGK		853.453	2	0.021186	853.457	-0.004126	1.85993	0.49667	sp|F8QN51|PA2A3_VIPRE/sp|P0CAS0|PA2A2_CERCE/	16,G,M/16,G,M/	0	RecName: Full=Acidic phospholipase A2 Vur-PL3; Short=svPLA2; AltName: Full=Phosphatidylcholine 2-acylhydrolase; Flags: Precursor [Vipera renardi]	Vipera renardi	26.1	26.1	1	0.85	1	137	F8QN51.1
			VSeo_35c.332.332.2 File:"VSeo_35c.raw", NativeID:"controllerType=0 controllerNumber=1 scan=332"	PLA2	YMLYSLFDCKEESEQC	16,GG[C](Dicarbamidomethyl[C]);	2101.84	2	0.36126	2101.86	-0.017361	0.986902	0.967213	sp|F8QN52|PA2A1_VIPRE/sp|Q910A1|PA2A1_VIPAA/	122,K,-/122,K,-/	1	ammodytin I1(D) isoform [Vipera ammodytes meridionalis]	Vipera ammodytes meridionalis	59.6	59.6	1	7e-12	1	138	CAE47179.1
			VSeo_35c.46.46.2 File:"VSeo_35c.raw", NativeID:"controllerType=0 controllerNumber=1 scan=46"	PLA2	VNGCDPK	2,Deamidated[N];4,Carbamidomethyl[C];	790.334	2	0.43509	790.34	-0.006281	1.9544	0.977801	sp|P20476|PA2A1_TRIGA/sp|Q9PWR6|PA2A7_DABPA/sp|P81479|PA2A4_TRIGA/sp|Q9YGJ7|PA2A8_DABPA/sp|B6CQR5|PA2A2_MACLB/sp|P81480|PA2A3_TRIGA/sp|Q6H3C8|PA2AF_TRIST/sp|Q6H3D0|PA2AA_TRIST/sp|C3W4R6|PA2A1_MACLB/sp|P34180|PA2N2_VIPAA/sp|F8QN52|PA2A1_VIPRE/sp|Q2YHJ5|PA2AB_TRIPE/sp|B5U6Z2|PA2A_MACLN/sp|Q98996|PA2A_DABPA/sp|Q910A0|PA23_ECHCO/sp|F8QN53|PA2A2_VIPRE/sp|P70088|PA2A6_TRIGA/sp|Q910A1|PA2A1_VIPAA/	69,K,K/69,T,L/53,K,K/68,T,L/69,S,L/53,K,K/69,K,D/69,K,K/69,S,L/69,R,L/69,R,M/53,K,D/69,T,L/69,T,L/69,R,M/69,R,L/69,K,D/69,R,M/	0	RecName: Full=Acidic phospholipase A2 VpaPLA2; Short=svPLA2; AltName: Full=Phosphatidylcholine 2-acylhydrolase; Flags: Precursor [Daboia palaestinae]	Daboia palaestinae	26.1	26.1	1	0.8	1	138	Q98996.1
			VSeo_35c.323.323.2 File:"VSeo_35c.raw", NativeID:"controllerType=0 controllerNumber=1 scan=323"	PLA2	MATYSTSFQNGDIVCGDNDLCLR	1,Oxidation[M];6,Thr->Cys[T];15,Carbamidomethyl[C];18,Asn->Pro[N];21,Carbamidomethyl[C];	2638.12	2	0.43509	2638.1	0.016712	0.840914	0.981713	sp|P0DKR3|PA2AA_PSEFE/	60,K,A/	0	RecName: Full=Acidic phospholipase A2 CbIalpha; Short=svPLA2; AltName: Full=Phosphatidylcholine 2-acylhydrolase [Pseudocerastes fieldi]	Pseudocerastes fieldi	79.1	79.1	1	3e-18	1	122	P0DKR3.1
			VSeo_35c.308.308.2 File:"VSeo_35c.raw", NativeID:"controllerType=0 controllerNumber=1 scan=308"	PLA2	PLDATDRCCFVHDCCYGR	0,Acetyl[ProteinN-term];5,Thr->Cys[T];	2117.84	2	0.46114	2117.81	0.023247	0.001	0.990187	sp|P24294|PA2A2_ERIMA/sp|F8QN52|PA2A1_VIPRE/sp|P24293|PA2A1_ERIMA/sp|Q910A1|PA2A1_VIPAA/	35,K,V/51,K,V/35,K,V/51,K,V/	1	ammodytin I1(E) isoform [Vipera aspis aspis]	Vipera aspis aspis	66.4	66.4	1	4e-14	1	138	CAE47133.1
			VSeo_35c.285.285.2 File:"VSeo_35c.raw", NativeID:"controllerType=0 controllerNumber=1 scan=285"	PLA2	VAAICFGENMNTYNK	5,Carbamidomethyl[C];14,Asn->Pro[N];	1714.8	2	0.47229	1714.79	0.0067	0.001	0.992032	sp|P24294|PA2A2_ERIMA/	90,R,K/	0	RecName: Full=Acidic phospholipase A2 PLA-2; Short=svPLA2; AltName: Full=Phosphatidylcholine 2-acylhydrolase [Eristicophis macmahoni]	Eristicophis macmahoni	34.3	34.3	1	0.002	1	121	P24294.1
			VSeo_35c.179.179.2 File:"VSeo_35c.raw", NativeID:"controllerType=0 controllerNumber=1 scan=179"	PLA2	YGRANGCDPK	5,Deamidated[N];7,Carbamidomethyl[C];	1138.49	2	0.47229	1138.49	-0.000102	0.813344	0.993062	sp|P31854|PA2B_VIPBB/sp|P0DPS4|PA2B_CERCE/	66,C,L/50,C,L/	1	RecName: Full=Basic phospholipase A2 Pla2Vb; Short=VbbPLA2; Short=svPLA2; AltName: Full=Phosphatidylcholine 2-acylhydrolase; Flags: Precursor [Vipera berus berus]	Vipera berus berus	35.8	35.8	1	0.0006	1	138	P31854.2
			VSeo_35c.149.149.3 File:"VSeo_35c.raw", NativeID:"controllerType=0 controllerNumber=1 scan=149"	PLA2	NLYQFGEMISK	1,Deamidated[N];8,Oxidation[M];	1346.64	3	0.47229	1346.63	0.008078	0.001	0.993764	sp|P24294|PA2A2_ERIMA/	0,-,K/	0	RecName: Full=Acidic phospholipase A2 PLA-2; Short=svPLA2; AltName: Full=Phosphatidylcholine 2-acylhydrolase [Eristicophis macmahoni]	Eristicophis macmahoni	40.5	40.5	1	1e-05	1	121	P24294.1
			VSeo_35c.94.94.2 File:"VSeo_35c.raw", NativeID:"controllerType=0 controllerNumber=1 scan=94"	PLA2	CFVHDCCYGR	7,GG[C](Dicarbamidomethyl[C]);	1316.48	2	0.4932	1316.5	-0.013167	0.002	0.995046	sp|A8CG87|PA2A2_DABRR/sp|P14421|PA2N_GLOHA/sp|P21789|PA2A_CERCE/sp|Q1RP79|PA2B1_VIPBN/sp|P24294|PA2A2_ERIMA/sp|P14420|PA2B_VIPAE/sp|Q10755|PA2B_VIPAZ/sp|P31854|PA2B_VIPBB/sp|P0DKR3|PA2AA_PSEFE/sp|F8QN51|PA2A3_VIPRE/sp|P34180|PA2N2_VIPAA/sp|P0DPS4|PA2B_CERCE/sp|Q8JFG0|PA2B_VIPAP/sp|Q1RP78|PA2B2_VIPBN/sp|F8QN52|PA2A1_VIPRE/sp|A8CG78|PA2A2_DABSI/sp|Q910A0|PA23_ECHCO/sp|F8QN53|PA2A2_VIPRE/sp|P24293|P…	59,C,V/43,C,L/43,C,V/59,C,V/43,C,V/43,C,V/43,C,V/59,C,A/43,C,V/59,C,V/59,C,V/43,C,A/59,C,V/59,C,V/59,C,V/59,C,V/59,C,V/59,C,V/43,C,V/43,C,V/59,C,V/	0	PLA2(IIA)-Aze2 [Azemiops feae]	Azemiops feae	40.1	40.1	1	2e-05	1	151	ABU68548.1
			VSeo_36a.262.262.4 File:"VSeo_36a.raw", NativeID:"controllerType=0 controllerNumber=1 scan=262"	CRISP	KPEIQNEIIDLHNSLR		1919.02	4	0	1919.03	-0.012048	9.3302	0.00602706	sp|B7FDI1|CRVP_VIPBE/sp|P0DMT4|CRVP_ECHCO/sp|Q8JI39|CRVP_PROFL/sp|B7FDI0|CRVP_VIPBN/sp|P79845|CRVP_PROMU/sp|Q7ZZN9|CRVP_PROJR/	29,R,R/10,R,R/29,R,R/11,R,R/29,R,R/29,R,R/	1	cysteine-rich venom protein [Protobothrops mucrosquamatus]	Protobothrops mucrosquamatus	55.8	70.8	1	1e-10	1	261	XP_015678374.1
			VSeo_36a.222.222.4 File:"VSeo_36a.raw", NativeID:"controllerType=0 controllerNumber=1 scan=222"	CRISP	WTAIIHEWHGEEK		1635.78	4	0	1635.79	-0.007023	8.64976	0.00646234	sp|B7FDI1|CRVP_VIPBE/	104,K,D/	0	RecName: Full=Cysteine-rich venom protein; Short=CRVP; Flags: Precursor [Vipera berus]	Vipera berus	35.4	35.4	1	0.0009	1	239	B7FDI1.1
			VSeo_36a.165.165.2 File:"VSeo_36a.raw", NativeID:"controllerType=0 controllerNumber=1 scan=165"	CRISP	SGCAAAYCPSSEYK	3,Carbamidomethyl[C];8,Carbamidomethyl[C];	1550.61	2	0	1550.62	-0.01198	9.03802	0.0171314	sp|B7FDI1|CRVP_VIPBE/sp|B7FDI0|CRVP_VIPBN/	145,R,Y/127,R,Y/	0	RecName: Full=Cysteine-rich venom protein; Short=CRVP; Flags: Precursor [Vipera berus]	Vipera berus	47.7	47.7	1	7e-08	1	239	B7FDI1.1
			VSeo_36a.120.120.3 File:"VSeo_36a.raw", NativeID:"controllerType=0 controllerNumber=1 scan=120"	CRISP	CILSHSPR	1,Carbamidomethyl[C];	969.489	3	0	969.493	-0.004736	5.91334	0.0304068	sp|B7FDI1|CRVP_VIPBE/sp|B7FDI0|CRVP_VIPBN/	74,R,D/56,R,D/	0	RecName: Full=Cysteine-rich venom protein; Short=CRVP; Flags: Precursor [Vipera berus]	Vipera berus	29.5	29.5	1	0.061	1	239	B7FDI1.1
			VSeo_36a.234.234.2 File:"VSeo_36a.raw", NativeID:"controllerType=0 controllerNumber=1 scan=234"	CRISP	YFYVCQYCPAGNMQGK	5,Carbamidomethyl[C];8,Carbamidomethyl[C];13,Oxidation[M];	2001.81	2	0	2001.83	-0.017429	1.9875	0.0775271	sp|B7FDI1|CRVP_VIPBE/sp|B7FDI0|CRVP_VIPBN/	159,K,T/141,K,T/	0	RecName: Full=Cysteine-rich venom protein; Short=CRVP; Flags: Precursor [Vipera berus]	Vipera berus	60	60	1	5e-12	1	239	B7FDI1.1
			VSeo_36a.252.252.2 File:"VSeo_36a.raw", NativeID:"controllerType=0 controllerNumber=1 scan=252"	CRISP	YFYVCQYCPAGNMQGK	5,Carbamidomethyl[C];8,Carbamidomethyl[C];	1985.82	2	0	1985.83	-0.013481	2.01501	0.12128	sp|B7FDI1|CRVP_VIPBE/sp|B7FDI0|CRVP_VIPBN/	159,K,T/141,K,T/	0	RecName: Full=Cysteine-rich venom protein; Short=CRVP; Flags: Precursor [Vipera berus]	Vipera berus	60	60	1	5e-12	1	239	B7FDI1.1
			VSeo_36a.142.142.2 File:"VSeo_36a.raw", NativeID:"controllerType=0 controllerNumber=1 scan=142"	CRISP	SVNPTASNMLK	9,Oxidation[M];	1177.58	2	0	1177.59	-0.00809	1.90864	0.131401	sp|B7FDI1|CRVP_VIPBE/sp|Q8JI39|CRVP_PROFL/sp|B7FDI0|CRVP_VIPBN/sp|Q8JI40|CRVP_GLOBL/sp|B0VXV6|CRVP_SISCA/sp|P79845|CRVP_PROMU/sp|F8S0Y4|CRVP_CROAD/sp|Q7ZT99|CRVP_CROAT/sp|Q7ZTA0|CRVP_AGKPI/sp|Q7ZZN9|CRVP_PROJR/	46,R,M/46,R,M/28,R,M/46,R,M/46,R,M/46,R,M/46,R,M/46,R,M/46,R,M/46,R,M/	0	cysteine-rich venom protein [Protobothrops mucrosquamatus]	Protobothrops mucrosquamatus	37.5	37.5	1	0.0002	1	261	XP_015678374.1
			VSeo_36a.250.250.2 File:"VSeo_36a.raw", NativeID:"controllerType=0 controllerNumber=1 scan=250"	CRISP	MEWYPEAAANAER		1537.66	2	0	1537.67	-0.010193	1.78687	0.14551	sp|B7FDI1|CRVP_VIPBE/sp|P0DMT4|CRVP_ECHCO/sp|Q8JI39|CRVP_PROFL/sp|B7FDI0|CRVP_VIPBN/sp|Q8JI40|CRVP_GLOBL/sp|P79845|CRVP_PROMU/sp|Q7ZT99|CRVP_CROAT/sp|Q7ZTA0|CRVP_AGKPI/sp|P0DJG8|CRVP_HELAG/sp|Q7ZZN9|CRVP_PROJR/sp|Q2XXQ0|CRVP_ERYPO/	57,K,W/38,R,W/57,K,W/39,K,W/57,K,W/57,K,W/57,K,W/57,K,W/0,-,Y/57,K,W/56,K,W/	0	RecName: Full=Helicopsin [Helicops angulatus]	Helicops angulatus	48.1	48.1	1	6e-09	1	21	P0DJG8.1
			VSeo_36a.249.249.2 File:"VSeo_36a.raw", NativeID:"controllerType=0 controllerNumber=1 scan=249"	CRISP	TNCPASCFCHNEII	3,Carbamidomethyl[C];7,Carbamidomethyl[C];9,Carbamidomethyl[C];	1722.69	2	0	1722.7	-0.01175	1.88376	0.199703	sp|Q7ZZN9|CRVP_PROJR/	226,K,-/	0	RecName: Full=Cysteine-rich venom protein; Short=TJ-CRVP; Flags: Precursor [Protobothrops jerdonii]	Protobothrops jerdonii	52	69.1	1	2e-09	1	240	Q7ZZN9.1
			VSeo_36a.126.126.2 File:"VSeo_36a.raw", NativeID:"controllerType=0 controllerNumber=1 scan=126"	CRISP	VIGGIK		586.39	2	0	586.392	-0.002731	2.7143	0.294007	sp|B7FDI1|CRVP_VIPBE/sp|Q8JI39|CRVP_PROFL/sp|B7FDI0|CRVP_VIPBN/sp|P79845|CRVP_PROMU/sp|F8S0Y4|CRVP_CROAD/sp|Q7ZT99|CRVP_CROAT/sp|Q7ZTA0|CRVP_AGKPI/	85,R,C/85,R,C/67,R,C/85,R,C/85,R,C/85,R,C/85,R,C/	0	cysteine-rich venom protein [Protobothrops mucrosquamatus]	Protobothrops mucrosquamatus	21	21	1	41	1	261	XP_015678374.1
			VSeo_36a.192.192.2 File:"VSeo_36a.raw", NativeID:"controllerType=0 controllerNumber=1 scan=192"	CRISP	SVNPTASNMLK		1161.59	2	0	1161.59	-0.006705	3.26909	0.298692	sp|B7FDI1|CRVP_VIPBE/sp|Q8JI39|CRVP_PROFL/sp|B7FDI0|CRVP_VIPBN/sp|Q8JI40|CRVP_GLOBL/sp|B0VXV6|CRVP_SISCA/sp|P79845|CRVP_PROMU/sp|F8S0Y4|CRVP_CROAD/sp|Q7ZT99|CRVP_CROAT/sp|Q7ZTA0|CRVP_AGKPI/sp|Q7ZZN9|CRVP_PROJR/	46,R,M/46,R,M/28,R,M/46,R,M/46,R,M/46,R,M/46,R,M/46,R,M/46,R,M/46,R,M/	0	cysteine-rich venom protein [Protobothrops mucrosquamatus]	Protobothrops mucrosquamatus	37.5	37.5	1	0.0002	1	261	XP_015678374.1
			VSeo_36a.159.159.2 File:"VSeo_36a.raw", NativeID:"controllerType=0 controllerNumber=1 scan=159"	CRISP	SVNPTASNMLK	0,Acetyl[ProteinN-term];8,Deamidated[N];	1204.59	2	0.48172	1204.59	0.004451	0.001	0.847011	sp|B7FDI1|CRVP_VIPBE/sp|Q8JI39|CRVP_PROFL/sp|B7FDI0|CRVP_VIPBN/sp|Q8JI40|CRVP_GLOBL/sp|B0VXV6|CRVP_SISCA/sp|P79845|CRVP_PROMU/sp|F8S0Y4|CRVP_CROAD/sp|Q7ZT99|CRVP_CROAT/sp|Q7ZTA0|CRVP_AGKPI/sp|Q7ZZN9|CRVP_PROJR/	46,R,M/46,R,M/28,R,M/46,R,M/46,R,M/46,R,M/46,R,M/46,R,M/46,R,M/46,R,M/	0	cysteine-rich venom protein [Protobothrops mucrosquamatus]	Protobothrops mucrosquamatus	37.5	37.5	1	0.0002	1	261	XP_015678374.1
			VSeo_36b.286.286.3 File:"VSeo_36b.raw", NativeID:"controllerType=0 controllerNumber=1 scan=286"	CRISP	KPEIQNEIIDLHNSLR		1919.02	3	0	1919.03	-0.014598	21.2905	4.50091e-05	sp|B7FDI1|CRVP_VIPBE/sp|P0DMT4|CRVP_ECHCO/sp|Q8JI39|CRVP_PROFL/sp|B7FDI0|CRVP_VIPBN/sp|P79845|CRVP_PROMU/sp|Q7ZZN9|CRVP_PROJR/	29,R,R/10,R,R/29,R,R/11,R,R/29,R,R/29,R,R/	1	cysteine-rich venom protein [Protobothrops mucrosquamatus]	Protobothrops mucrosquamatus	55.8	70.8	1	1e-10	1	261	XP_015678374.1
			VSeo_36b.271.271.2 File:"VSeo_36b.raw", NativeID:"controllerType=0 controllerNumber=1 scan=271"	CRISP	MEWYPEAAANAER		1537.66	2	0	1537.67	-0.013367	14.38	0.000190665	sp|B7FDI1|CRVP_VIPBE/sp|P0DMT4|CRVP_ECHCO/sp|Q8JI39|CRVP_PROFL/sp|B7FDI0|CRVP_VIPBN/sp|Q8JI40|CRVP_GLOBL/sp|P79845|CRVP_PROMU/sp|Q7ZT99|CRVP_CROAT/sp|Q7ZTA0|CRVP_AGKPI/sp|P0DJG8|CRVP_HELAG/sp|Q7ZZN9|CRVP_PROJR/sp|Q2XXQ0|CRVP_ERYPO/	57,K,W/38,R,W/57,K,W/39,K,W/57,K,W/57,K,W/57,K,W/57,K,W/0,-,Y/57,K,W/56,K,W/	0	RecName: Full=Helicopsin [Helicops angulatus]	Helicops angulatus	48.1	48.1	1	6e-09	1	21	P0DJG8.1
			VSeo_36b.175.175.2 File:"VSeo_36b.raw", NativeID:"controllerType=0 controllerNumber=1 scan=175"	CRISP	SGCAAAYCPSSEYK	3,Carbamidomethyl[C];8,Carbamidomethyl[C];	1550.61	2	0	1550.62	-0.011492	16.0741	0.000210377	sp|B7FDI1|CRVP_VIPBE/sp|B7FDI0|CRVP_VIPBN/	145,R,Y/127,R,Y/	0	RecName: Full=Cysteine-rich venom protein; Short=CRVP; Flags: Precursor [Vipera berus]	Vipera berus	47.7	47.7	1	7e-08	1	239	B7FDI1.1
			VSeo_36b.256.256.2 File:"VSeo_36b.raw", NativeID:"controllerType=0 controllerNumber=1 scan=256"	CRISP	YFYVCQYCPAGNMQGK	5,Carbamidomethyl[C];8,Carbamidomethyl[C];13,Oxidation[M];	2001.81	2	0	2001.83	-0.016086	22.7567	0.000243892	sp|B7FDI1|CRVP_VIPBE/sp|B7FDI0|CRVP_VIPBN/	159,K,T/141,K,T/	0	RecName: Full=Cysteine-rich venom protein; Short=CRVP; Flags: Precursor [Vipera berus]	Vipera berus	60	60	1	5e-12	1	239	B7FDI1.1
			VSeo_36b.184.184.2 File:"VSeo_36b.raw", NativeID:"controllerType=0 controllerNumber=1 scan=184"	CRISP	SVDFDSESPR		1138.49	2	0	1138.5	-0.009189	12.8862	0.000571805	sp|P0DL18|CRVP_OVOOK/sp|P86537|CRVP_DABRR/sp|B0VXV6|CRVP_SISCA/sp|F8S0Y4|CRVP_CROAD/sp|Q7ZT99|CRVP_CROAT/sp|Q7ZTA0|CRVP_AGKPI/sp|P0DMG5|CRVP_BOTCO/sp|P0DMG6|CRVP_BOTFO/	0,-,K/0,-,-/19,G,K/19,G,K/19,G,K/19,G,K/0,-,K/0,-,K/	0	RecName: Full=Cysteine-rich venom protein; Short=CRVP; AltName: Full=Cysteine-rich secretory protein; Short=CRISP [Daboia russelii]	Daboia russelii	34.6	34.6	1	0.0003	1	10	P86537.1
			VSeo_36b.242.242.3 File:"VSeo_36b.raw", NativeID:"controllerType=0 controllerNumber=1 scan=242"	CRISP	WTAIIHEWHGEEK		1635.79	3	0	1635.79	-0.004751	9.52362	0.000820251	sp|B7FDI1|CRVP_VIPBE/	104,K,D/	0	RecName: Full=Cysteine-rich venom protein; Short=CRVP; Flags: Precursor [Vipera berus]	Vipera berus	35.4	35.4	1	0.0009	1	239	B7FDI1.1
			VSeo_36b.208.208.2 File:"VSeo_36b.raw", NativeID:"controllerType=0 controllerNumber=1 scan=208"	CRISP	SVNPTASNMLK		1161.59	2	0	1161.59	-0.006339	10.0038	0.00102484	sp|B7FDI1|CRVP_VIPBE/sp|Q8JI39|CRVP_PROFL/sp|B7FDI0|CRVP_VIPBN/sp|Q8JI40|CRVP_GLOBL/sp|B0VXV6|CRVP_SISCA/sp|P79845|CRVP_PROMU/sp|F8S0Y4|CRVP_CROAD/sp|Q7ZT99|CRVP_CROAT/sp|Q7ZTA0|CRVP_AGKPI/sp|Q7ZZN9|CRVP_PROJR/	46,R,M/46,R,M/28,R,M/46,R,M/46,R,M/46,R,M/46,R,M/46,R,M/46,R,M/46,R,M/	0	cysteine-rich venom protein [Protobothrops mucrosquamatus]	Protobothrops mucrosquamatus	37.5	37.5	1	0.0002	1	261	XP_015678374.1
			VSeo_36b.124.124.2 File:"VSeo_36b.raw", NativeID:"controllerType=0 controllerNumber=1 scan=124"	CRISP	CILSHSPR	1,Carbamidomethyl[C];	969.487	2	0	969.493	-0.006798	11.1254	0.00196497	sp|B7FDI1|CRVP_VIPBE/sp|B7FDI0|CRVP_VIPBN/	74,R,D/56,R,D/	0	RecName: Full=Cysteine-rich venom protein; Short=CRVP; Flags: Precursor [Vipera berus]	Vipera berus	29.5	29.5	1	0.061	1	239	B7FDI1.1
			VSeo_36b.266.266.4 File:"VSeo_36b.raw", NativeID:"controllerType=0 controllerNumber=1 scan=266"	CRISP	KPEIQNEIIDLHNSLRR		2075.13	4	0	2075.14	-0.006705	13.8915	0.00330509	sp|B7FDI1|CRVP_VIPBE/sp|P0DMT4|CRVP_ECHCO/sp|Q8JI39|CRVP_PROFL/sp|B7FDI0|CRVP_VIPBN/sp|P79845|CRVP_PROMU/sp|Q7ZZN9|CRVP_PROJR/	29,R,S/10,R,S/29,R,S/11,R,S/29,R,S/29,R,S/	2	RecName: Full=Cysteine-rich venom protein; Short=CRVP; AltName: Full=ECO_00025 [Echis coloratus]	Echis coloratus	40.8	40.8	1	1e-05	1	220	P0DMT4.1
			VSeo_36b.148.148.2 File:"VSeo_36b.raw", NativeID:"controllerType=0 controllerNumber=1 scan=148"	CRISP	SVNPTASNMLK	9,Oxidation[M];	1177.58	2	0	1177.59	-0.009799	8.17429	0.00776364	sp|B7FDI1|CRVP_VIPBE/sp|Q8JI39|CRVP_PROFL/sp|B7FDI0|CRVP_VIPBN/sp|Q8JI40|CRVP_GLOBL/sp|B0VXV6|CRVP_SISCA/sp|P79845|CRVP_PROMU/sp|F8S0Y4|CRVP_CROAD/sp|Q7ZT99|CRVP_CROAT/sp|Q7ZTA0|CRVP_AGKPI/sp|Q7ZZN9|CRVP_PROJR/	46,R,M/46,R,M/28,R,M/46,R,M/46,R,M/46,R,M/46,R,M/46,R,M/46,R,M/46,R,M/	0	cysteine-rich venom protein [Protobothrops mucrosquamatus]	Protobothrops mucrosquamatus	37.5	37.5	1	0.0002	1	261	XP_015678374.1
			VSeo_36b.272.272.2 File:"VSeo_36b.raw", NativeID:"controllerType=0 controllerNumber=1 scan=272"	CRISP	TNCPASCFCHNEII	3,Carbamidomethyl[C];7,Carbamidomethyl[C];9,Carbamidomethyl[C];	1722.69	2	0	1722.7	-0.013581	9.71143	0.00941651	sp|Q7ZZN9|CRVP_PROJR/	226,K,-/	0	RecName: Full=Cysteine-rich venom protein; Short=TJ-CRVP; Flags: Precursor [Protobothrops jerdonii]	Protobothrops jerdonii	52	69.1	1	2e-09	1	240	Q7ZZN9.1
			VSeo_36b.281.281.2 File:"VSeo_36b.raw", NativeID:"controllerType=0 controllerNumber=1 scan=281"	CRISP	YFYVCQYCPAGNMQGK	5,Carbamidomethyl[C];8,Carbamidomethyl[C];	1985.82	2	0	1985.83	-0.011161	13.8326	0.00982774	sp|B7FDI1|CRVP_VIPBE/sp|B7FDI0|CRVP_VIPBN/	159,K,T/141,K,T/	0	RecName: Full=Cysteine-rich venom protein; Short=CRVP; Flags: Precursor [Vipera berus]	Vipera berus	60	60	1	5e-12	1	239	B7FDI1.1
			VSeo_36b.302.302.2 File:"VSeo_36b.raw", NativeID:"controllerType=0 controllerNumber=1 scan=302"	CRISP	CGENIYMSPIPMK	1,Carbamidomethyl[C];	1539.69	2	0	1539.7	-0.012804	8.57997	0.0126394	sp|Q8JI40|CRVP_GLOBL/	91,K,W/	0	RecName: Full=Cysteine-rich venom protein ablomin; Flags: Precursor [Gloydius blomhoffii]	Gloydius blomhoffii	49.4	49.4	1	1e-08	1	240	Q8JI40.1
			VSeo_36b.263.263.2 File:"VSeo_36b.raw", NativeID:"controllerType=0 controllerNumber=1 scan=263"	CRISP	PASCFCHNEII	4,Dipyrrolylmethanemethyl[C];6,Carbamidomethyl[C];	1708.67	2	0	1708.7	-0.023874	6.11253	0.0158928	sp|Q7ZZN9|CRVP_PROJR/	229,C,-/	0	RecName: Full=Cysteine-rich venom protein; Short=TJ-CRVP; Flags: Precursor [Protobothrops jerdonii]	Protobothrops jerdonii	41.4	58.5	1	7e-06	1	240	Q7ZZN9.1
			VSeo_36b.316.316.2 File:"VSeo_36b.raw", NativeID:"controllerType=0 controllerNumber=1 scan=316"	CRISP	YFYVCQYCPAGNIIGK	5,Carbamidomethyl[C];8,Carbamidomethyl[C];	1952.89	2	0	1952.9	-0.009304	4.89935	0.0197286	sp|P0DMT4|CRVP_ECHCO/sp|Q8JI39|CRVP_PROFL/sp|Q7ZT99|CRVP_CROAT/sp|Q7ZTA0|CRVP_AGKPI/	140,K,T/159,S,T/159,S,T/159,S,I/	0	cysteine-rich venom protein catrin-like [Crotalus tigris]	Crotalus tigris	58.7	58.7	1	1e-11	1	260	XP_039185516.1
			VSeo_36b.349.349.3 File:"VSeo_36b.raw", NativeID:"controllerType=0 controllerNumber=1 scan=349"	CRISP	DFVYGQGASPANAVVGHYTQIVWYK	12,Deamidated[N];	2771.34	3	0	2771.35	-0.002913	6.29603	0.0373988	sp|B7FDI1|CRVP_VIPBE/sp|B7FDI0|CRVP_VIPBN/	117,K,S/99,K,S/	0	RecName: Full=Cysteine-rich venom protein; Short=CRVP; Flags: Precursor [Vipera berus]	Vipera berus	58.2	58.2	1	9e-12	1	239	B7FDI1.1
			VSeo_36b.179.179.2 File:"VSeo_36b.raw", NativeID:"controllerType=0 controllerNumber=1 scan=179"	CRISP	RSVNPTASNMLK		1317.69	2	0	1317.69	-0.00417	6.74197	0.0411161	sp|B7FDI1|CRVP_VIPBE/sp|Q8JI39|CRVP_PROFL/sp|B7FDI0|CRVP_VIPBN/sp|Q8JI40|CRVP_GLOBL/sp|B0VXV6|CRVP_SISCA/sp|P79845|CRVP_PROMU/sp|F8S0Y4|CRVP_CROAD/sp|Q7ZT99|CRVP_CROAT/sp|Q7ZTA0|CRVP_AGKPI/sp|Q7ZZN9|CRVP_PROJR/	45,R,M/45,R,M/27,R,M/45,R,M/45,R,M/45,R,M/45,R,M/45,R,M/45,R,M/45,R,M/	1	cysteine-rich venom protein [Protobothrops mucrosquamatus]	Protobothrops mucrosquamatus	40.9	40.9	1	1e-05	1	261	XP_015678374.1
			VSeo_36b.133.133.2 File:"VSeo_36b.raw", NativeID:"controllerType=0 controllerNumber=1 scan=133"	CRISP	VIGGIK		586.39	2	0	586.392	-0.002609	2.4997	0.0570777	sp|B7FDI1|CRVP_VIPBE/sp|Q8JI39|CRVP_PROFL/sp|B7FDI0|CRVP_VIPBN/sp|P79845|CRVP_PROMU/sp|F8S0Y4|CRVP_CROAD/sp|Q7ZT99|CRVP_CROAT/sp|Q7ZTA0|CRVP_AGKPI/	85,R,C/85,R,C/67,R,C/85,R,C/85,R,C/85,R,C/85,R,C/	0	cysteine-rich venom protein [Protobothrops mucrosquamatus]	Protobothrops mucrosquamatus	21	21	1	41	1	261	XP_015678374.1
			VSeo_36b.355.355.3 File:"VSeo_36b.raw", NativeID:"controllerType=0 controllerNumber=1 scan=355"	CRISP	DFVYGQGASPANAVVGHYTQIVWYK		2770.34	3	0	2770.36	-0.020301	3.27516	0.107947	sp|B7FDI1|CRVP_VIPBE/sp|B7FDI0|CRVP_VIPBN/	117,K,S/99,K,S/	0	RecName: Full=Cysteine-rich venom protein; Short=CRVP; Flags: Precursor [Vipera berus]	Vipera berus	58.2	58.2	1	9e-12	1	239	B7FDI1.1
			VSeo_36b.145.145.2 File:"VSeo_36b.raw", NativeID:"controllerType=0 controllerNumber=1 scan=145"	CRISP	QGCNNNYLK	3,Carbamidomethyl[C];4,Deamidated[N];	1111.48	2	0	1111.48	-0.006905	4.82883	0.283137	sp|B7FDI1|CRVP_VIPBE/sp|B7FDI0|CRVP_VIPBN/	216,K,T/198,K,T/	0	cysteine-rich secretory protein CRISP-1 [Vipera ammodytes ammodytes]	Vipera ammodytes ammodytes	33.7	33.7	1	0.002	1	239	AMB36337.1
			VSeo_36b.160.160.3 File:"VSeo_36b.raw", NativeID:"controllerType=0 controllerNumber=1 scan=160"	CRISP	DLVKERKCQT	7,Phosphoguanosine[K];	1564.7	3	0	1564.69	0.010794	3.24233	0.297729	sp|Q8UW11|CRVP2_HYDHA/	210,N,E/	3	RecName: Full=Cysteine-rich venom protein 2; Short=CRVP; Flags: Precursor [Hydrophis hardwickii]	Hydrophis hardwickii	35.8	35.8	1	0.0005	1	238	Q8UW11.2
			VSeo_36b.347.347.2 File:"VSeo_36b.raw", NativeID:"controllerType=0 controllerNumber=1 scan=347"	CRISP	MEWYSEAAANAER	1,Oxidation[M];10,Deamidated[N];	1544.64	2	0.017842	1544.63	0.012324	1.71328	0.573572	sp|B0VXV6|CRVP_SISCA/	57,K,W/	0	RecName: Full=Cysteine-rich venom protein 2; Short=CRVP; AltName: Full=Cysteine-rich secretory protein 2; Short=CRISP-2; Flags: Precursor [Sistrurus catenatus edwardsi]	Sistrurus catenatus edwardsi	47.3	47.3	1	9e-08	1	239	B0VXV6.1
			VSeo_36c.261.261.3 File:"VSeo_36c.raw", NativeID:"controllerType=0 controllerNumber=1 scan=261"	CRISP	KPEIQNEIIDLHNSLR		1919.02	3	0	1919.03	-0.011119	16.3695	0.00533801	sp|B7FDI1|CRVP_VIPBE/sp|P0DMT4|CRVP_ECHCO/sp|Q8JI39|CRVP_PROFL/sp|B7FDI0|CRVP_VIPBN/sp|P79845|CRVP_PROMU/sp|Q7ZZN9|CRVP_PROJR/	29,R,R/10,R,R/29,R,R/11,R,R/29,R,R/29,R,R/	1	cysteine-rich venom protein [Protobothrops mucrosquamatus]	Protobothrops mucrosquamatus	55.8	70.8	1	1e-10	1	261	XP_015678374.1
			VSeo_36c.169.169.2 File:"VSeo_36c.raw", NativeID:"controllerType=0 controllerNumber=1 scan=169"	CRISP	SGCAAAYCPSSEYK	3,Carbamidomethyl[C];8,Carbamidomethyl[C];	1550.61	2	0	1550.62	-0.01198	3.87847	0.0194977	sp|B7FDI1|CRVP_VIPBE/sp|B7FDI0|CRVP_VIPBN/	145,R,Y/127,R,Y/	0	RecName: Full=Cysteine-rich venom protein; Short=CRVP; Flags: Precursor [Vipera berus]	Vipera berus	47.7	47.7	1	7e-08	1	239	B7FDI1.1
			VSeo_36c.225.225.4 File:"VSeo_36c.raw", NativeID:"controllerType=0 controllerNumber=1 scan=225"	CRISP	WTAIIHEWHGEEK		1635.78	4	0	1635.79	-0.006779	6.51455	0.0242226	sp|B7FDI1|CRVP_VIPBE/	104,K,D/	0	RecName: Full=Cysteine-rich venom protein; Short=CRVP; Flags: Precursor [Vipera berus]	Vipera berus	35.4	35.4	1	0.0009	1	239	B7FDI1.1
			VSeo_36c.123.123.2 File:"VSeo_36c.raw", NativeID:"controllerType=0 controllerNumber=1 scan=123"	CRISP	CILSHSPR	1,Carbamidomethyl[C];	969.487	2	0	969.493	-0.006188	5.56913	0.0247463	sp|B7FDI1|CRVP_VIPBE/sp|B7FDI0|CRVP_VIPBN/	74,R,D/56,R,D/	0	RecName: Full=Cysteine-rich venom protein; Short=CRVP; Flags: Precursor [Vipera berus]	Vipera berus	29.5	29.5	1	0.061	1	239	B7FDI1.1
			VSeo_36c.246.246.4 File:"VSeo_36c.raw", NativeID:"controllerType=0 controllerNumber=1 scan=246"	CRISP	KPEIQNEIIDLHNSLRR		2075.12	4	0	2075.14	-0.012076	2.78753	0.0770195	sp|B7FDI1|CRVP_VIPBE/sp|P0DMT4|CRVP_ECHCO/sp|Q8JI39|CRVP_PROFL/sp|B7FDI0|CRVP_VIPBN/sp|P79845|CRVP_PROMU/sp|Q7ZZN9|CRVP_PROJR/	29,R,S/10,R,S/29,R,S/11,R,S/29,R,S/29,R,S/	2	RecName: Full=Cysteine-rich venom protein; Short=CRVP; AltName: Full=ECO_00025 [Echis coloratus]	Echis coloratus	40.8	40.8	1	1e-05	1	220	P0DMT4.1
			VSeo_36c.238.238.2 File:"VSeo_36c.raw", NativeID:"controllerType=0 controllerNumber=1 scan=238"	CRISP	YFYVCQYCPAGNMQGK	5,Carbamidomethyl[C];8,Carbamidomethyl[C];13,Oxidation[M];	2001.81	2	0	2001.83	-0.01572	4.9257	0.103733	sp|B7FDI1|CRVP_VIPBE/sp|B7FDI0|CRVP_VIPBN/	159,K,T/141,K,T/	0	RecName: Full=Cysteine-rich venom protein; Short=CRVP; Flags: Precursor [Vipera berus]	Vipera berus	60	60	1	5e-12	1	239	B7FDI1.1
			VSeo_36c.249.249.2 File:"VSeo_36c.raw", NativeID:"controllerType=0 controllerNumber=1 scan=249"	CRISP	MEWYPEAAANAER		1537.66	2	0	1537.67	-0.011292	6.66767	0.12833	sp|B7FDI1|CRVP_VIPBE/sp|P0DMT4|CRVP_ECHCO/sp|Q8JI39|CRVP_PROFL/sp|B7FDI0|CRVP_VIPBN/sp|Q8JI40|CRVP_GLOBL/sp|P79845|CRVP_PROMU/sp|Q7ZT99|CRVP_CROAT/sp|Q7ZTA0|CRVP_AGKPI/sp|P0DJG8|CRVP_HELAG/sp|Q7ZZN9|CRVP_PROJR/sp|Q2XXQ0|CRVP_ERYPO/	57,K,W/38,R,W/57,K,W/39,K,W/57,K,W/57,K,W/57,K,W/57,K,W/0,-,Y/57,K,W/56,K,W/	0	RecName: Full=Helicopsin [Helicops angulatus]	Helicops angulatus	48.1	48.1	1	6e-09	1	21	P0DJG8.1
			VSeo_36c.195.195.2 File:"VSeo_36c.raw", NativeID:"controllerType=0 controllerNumber=1 scan=195"	CRISP	SVNPTASNMLK		1161.59	2	0	1161.59	-0.007804	2.63108	0.172179	sp|B7FDI1|CRVP_VIPBE/sp|Q8JI39|CRVP_PROFL/sp|B7FDI0|CRVP_VIPBN/sp|Q8JI40|CRVP_GLOBL/sp|B0VXV6|CRVP_SISCA/sp|P79845|CRVP_PROMU/sp|F8S0Y4|CRVP_CROAD/sp|Q7ZT99|CRVP_CROAT/sp|Q7ZTA0|CRVP_AGKPI/sp|Q7ZZN9|CRVP_PROJR/	46,R,M/46,R,M/28,R,M/46,R,M/46,R,M/46,R,M/46,R,M/46,R,M/46,R,M/46,R,M/	0	cysteine-rich venom protein [Protobothrops mucrosquamatus]	Protobothrops mucrosquamatus	37.5	37.5	1	0.0002	1	261	XP_015678374.1
			VSeo_36c.142.142.2 File:"VSeo_36c.raw", NativeID:"controllerType=0 controllerNumber=1 scan=142"	CRISP	SVNPTASNMLK	9,Oxidation[M];	1177.58	2	0	1177.59	-0.008334	1.92746	0.172694	sp|B7FDI1|CRVP_VIPBE/sp|Q8JI39|CRVP_PROFL/sp|B7FDI0|CRVP_VIPBN/sp|Q8JI40|CRVP_GLOBL/sp|B0VXV6|CRVP_SISCA/sp|P79845|CRVP_PROMU/sp|F8S0Y4|CRVP_CROAD/sp|Q7ZT99|CRVP_CROAT/sp|Q7ZTA0|CRVP_AGKPI/sp|Q7ZZN9|CRVP_PROJR/	46,R,M/46,R,M/28,R,M/46,R,M/46,R,M/46,R,M/46,R,M/46,R,M/46,R,M/46,R,M/	0	cysteine-rich venom protein [Protobothrops mucrosquamatus]	Protobothrops mucrosquamatus	37.5	37.5	1	0.0002	1	261	XP_015678374.1
			VSeo_36c.129.129.2 File:"VSeo_36c.raw", NativeID:"controllerType=0 controllerNumber=1 scan=129"	CRISP	VIGGIK		586.389	2	0	586.392	-0.002914	2.72588	0.292175	sp|B7FDI1|CRVP_VIPBE/sp|Q8JI39|CRVP_PROFL/sp|B7FDI0|CRVP_VIPBN/sp|P79845|CRVP_PROMU/sp|F8S0Y4|CRVP_CROAD/sp|Q7ZT99|CRVP_CROAT/sp|Q7ZTA0|CRVP_AGKPI/	85,R,C/85,R,C/67,R,C/85,R,C/85,R,C/85,R,C/85,R,C/	0	cysteine-rich venom protein [Protobothrops mucrosquamatus]	Protobothrops mucrosquamatus	21	21	1	41	1	261	XP_015678374.1
			VSeo_36c.229.229.2 File:"VSeo_36c.raw", NativeID:"controllerType=0 controllerNumber=1 scan=229"	CRISP	MEWYPEAAANAER	1,Oxidation[M];	1553.66	2	0	1553.67	-0.012676	0.973638	0.343228	sp|B7FDI1|CRVP_VIPBE/sp|P0DMT4|CRVP_ECHCO/sp|Q8JI39|CRVP_PROFL/sp|B7FDI0|CRVP_VIPBN/sp|Q8JI40|CRVP_GLOBL/sp|P79845|CRVP_PROMU/sp|Q7ZT99|CRVP_CROAT/sp|Q7ZTA0|CRVP_AGKPI/sp|P0DJG8|CRVP_HELAG/sp|Q7ZZN9|CRVP_PROJR/sp|Q2XXQ0|CRVP_ERYPO/	57,K,W/38,R,W/57,K,W/39,K,W/57,K,W/57,K,W/57,K,W/57,K,W/0,-,Y/57,K,W/56,K,W/	0	RecName: Full=Helicopsin [Helicops angulatus]	Helicops angulatus	48.1	48.1	1	6e-09	1	21	P0DJG8.1
			VSeo_36c.250.250.2 File:"VSeo_36c.raw", NativeID:"controllerType=0 controllerNumber=1 scan=250"	CRISP	TNCPASCFCHNEII	3,Carbamidomethyl[C];7,Carbamidomethyl[C];9,Carbamidomethyl[C];	1722.69	2	0	1722.7	-0.014069	1.01048	0.357572	sp|Q7ZZN9|CRVP_PROJR/	226,K,-/	0	RecName: Full=Cysteine-rich venom protein; Short=TJ-CRVP; Flags: Precursor [Protobothrops jerdonii]	Protobothrops jerdonii	52	69.1	1	2e-09	1	240	Q7ZZN9.1
			VSeo_36e.172.172.3 File:"VSeo_36e.raw", NativeID:"controllerType=0 controllerNumber=1 scan=172"	PLA2	CCFVHDCCYGR	1,Carbamidomethyl[C];2,Carbamidomethyl[C];7,Carbamidomethyl[C];8,Carbamidomethyl[C];	1533.54	3	0	1533.55	-0.01231	12.861	1.09287e-06	sp|A8CG87|PA2A2_DABRR/sp|P14421|PA2N_GLOHA/sp|P21789|PA2A_CERCE/sp|Q1RP79|PA2B1_VIPBN/sp|P24294|PA2A2_ERIMA/sp|P14420|PA2B_VIPAE/sp|Q10755|PA2B_VIPAZ/sp|P31854|PA2B_VIPBB/sp|P0DKR3|PA2AA_PSEFE/sp|F8QN51|PA2A3_VIPRE/sp|P34180|PA2N2_VIPAA/sp|P0DPS4|PA2B_CERCE/sp|Q8JFG0|PA2B_VIPAP/sp|Q1RP78|PA2B2_VIPBN/sp|F8QN52|PA2A1_VIPRE/sp|A8CG78|PA2A2_DABSI/sp|Q910A0|PA23_ECHCO/sp|F8QN53|PA2A2_VIPRE/sp|P24293|P…	58,R,V/42,R,L/42,R,V/58,R,V/42,R,V/42,R,V/42,R,V/58,R,A/42,R,V/58,R,V/58,R,V/42,R,A/58,R,V/58,R,V/58,R,V/58,R,V/58,R,V/58,R,V/42,R,V/42,R,V/58,R,V/	0	PLA2(IIA)-Aze2 [Azemiops feae]	Azemiops feae	44.3	44.3	1	6e-07	1	151	ABU68548.1
			VSeo_36e.277.277.2 File:"VSeo_36e.raw", NativeID:"controllerType=0 controllerNumber=1 scan=277"	PLA2	VAAICFGENLNTYDK	5,Carbamidomethyl[C];	1714.8	2	0	1714.81	-0.012524	11.7891	4.15373e-06	sp|P34180|PA2N2_VIPAA/sp|F8QN53|PA2A2_VIPRE/	106,R,K/106,R,K/	0	ammodytin I2(A'') isoform [Vipera aspis aspis]	Vipera aspis aspis	52	52	1	3e-09	1	137	CAE47205.1
			VSeo_36e.230.230.2 File:"VSeo_36e.raw", NativeID:"controllerType=0 controllerNumber=1 scan=230"	PLA2	CCFVHDCCYGR	1,maleimide[C];7,Carbamidomethyl[C];8,Carbamidomethyl[C];	1516.51	2	0	1516.52	-0.013457	12.7061	4.62884e-06	sp|A8CG87|PA2A2_DABRR/sp|P14421|PA2N_GLOHA/sp|P21789|PA2A_CERCE/sp|Q1RP79|PA2B1_VIPBN/sp|P24294|PA2A2_ERIMA/sp|P14420|PA2B_VIPAE/sp|Q10755|PA2B_VIPAZ/sp|P31854|PA2B_VIPBB/sp|P0DKR3|PA2AA_PSEFE/sp|F8QN51|PA2A3_VIPRE/sp|P34180|PA2N2_VIPAA/sp|P0DPS4|PA2B_CERCE/sp|Q8JFG0|PA2B_VIPAP/sp|Q1RP78|PA2B2_VIPBN/sp|F8QN52|PA2A1_VIPRE/sp|A8CG78|PA2A2_DABSI/sp|Q910A0|PA23_ECHCO/sp|F8QN53|PA2A2_VIPRE/sp|P24293|P…	58,R,V/42,R,L/42,R,V/58,R,V/42,R,V/42,R,V/42,R,V/58,R,A/42,R,V/58,R,V/58,R,V/42,R,A/58,R,V/58,R,V/58,R,V/58,R,V/58,R,V/58,R,V/42,R,V/42,R,V/58,R,V/	0	PLA2(IIA)-Aze2 [Azemiops feae]	Azemiops feae	44.3	44.3	1	6e-07	1	151	ABU68548.1
			VSeo_36e.265.265.2 File:"VSeo_36e.raw", NativeID:"controllerType=0 controllerNumber=1 scan=265"	PLA2	VAAICFGENMNTYDK	5,Carbamidomethyl[C];	1732.75	2	0	1732.77	-0.0135	11.0171	5.33936e-06	sp|C3W4R6|PA2A1_MACLB/sp|B5U6Z2|PA2A_MACLN/sp|Q98996|PA2A_DABPA/sp|Q910A1|PA2A1_VIPAA/	106,R,K/106,R,K/106,R,K/106,R,K/	0	RecName: Full=Acidic phospholipase A2 VpaPLA2; Short=svPLA2; AltName: Full=Phosphatidylcholine 2-acylhydrolase; Flags: Precursor [Daboia palaestinae]	Daboia palaestinae	53.7	53.7	1	7e-10	1	138	Q98996.1
			VSeo_36e.329.329.2 File:"VSeo_36e.raw", NativeID:"controllerType=0 controllerNumber=1 scan=329"	PLA2	YMLYSLFDCKEESEQC	9,Carbamidomethyl[C];16,Carbamidomethyl[C];	2101.84	2	0	2101.86	-0.014188	12.4321	9.17648e-05	sp|F8QN52|PA2A1_VIPRE/sp|Q910A1|PA2A1_VIPAA/	122,K,-/122,K,-/	1	ammodytin I1(D) isoform [Vipera ammodytes meridionalis]	Vipera ammodytes meridionalis	59.6	59.6	1	7e-12	1	138	CAE47179.1
			VSeo_36e.307.307.2 File:"VSeo_36e.raw", NativeID:"controllerType=0 controllerNumber=1 scan=307"	PLA2	YMLYSLFDCKEESEQC	2,Oxidation[M];9,Carbamidomethyl[C];16,Carbamidomethyl[C];	2117.83	2	0	2117.85	-0.016671	13.9991	9.68171e-05	sp|F8QN52|PA2A1_VIPRE/sp|Q910A1|PA2A1_VIPAA/	122,K,-/122,K,-/	1	ammodytin I1(D) isoform [Vipera ammodytes meridionalis]	Vipera ammodytes meridionalis	59.6	59.6	1	7e-12	1	138	CAE47179.1
			VSeo_36e.214.214.3 File:"VSeo_36e.raw", NativeID:"controllerType=0 controllerNumber=1 scan=214"	PLA2	VAAICFGENMNTYDKK	5,Carbamidomethyl[C];10,Oxidation[M];	1876.84	3	0	1876.86	-0.014151	6.55385	0.000105233	sp|C3W4R6|PA2A1_MACLB/sp|B5U6Z2|PA2A_MACLN/sp|Q98996|PA2A_DABPA/sp|Q910A1|PA2A1_VIPAA/	106,R,Y/106,R,Y/106,R,Y/106,R,Y/	1	RecName: Full=Acidic phospholipase A2 VpaPLA2; Short=svPLA2; AltName: Full=Phosphatidylcholine 2-acylhydrolase; Flags: Precursor [Daboia palaestinae]	Daboia palaestinae	56.6	56.6	1	7e-11	1	138	Q98996.1
			VSeo_36e.241.241.3 File:"VSeo_36e.raw", NativeID:"controllerType=0 controllerNumber=1 scan=241"	PLA2	VAAICFGENMNTYDKK	5,Carbamidomethyl[C];	1860.85	3	0	1860.86	-0.012217	7.746	0.000106655	sp|C3W4R6|PA2A1_MACLB/sp|B5U6Z2|PA2A_MACLN/sp|Q98996|PA2A_DABPA/sp|Q910A1|PA2A1_VIPAA/	106,R,Y/106,R,Y/106,R,Y/106,R,Y/	1	RecName: Full=Acidic phospholipase A2 VpaPLA2; Short=svPLA2; AltName: Full=Phosphatidylcholine 2-acylhydrolase; Flags: Precursor [Daboia palaestinae]	Daboia palaestinae	56.6	56.6	1	7e-11	1	138	Q98996.1
			VSeo_36e.223.223.3 File:"VSeo_36e.raw", NativeID:"controllerType=0 controllerNumber=1 scan=223"	PLA2	AAAICFGENVNTYDKK	5,Carbamidomethyl[C];	1800.85	3	0	1800.86	-0.011595	5.62106	0.000142758	sp|F8QN51|PA2A3_VIPRE/	106,R,Y/	1	RecName: Full=Acidic phospholipase A2 Vur-PL3; Short=svPLA2; AltName: Full=Phosphatidylcholine 2-acylhydrolase; Flags: Precursor [Vipera renardi]	Vipera renardi	54.5	54.5	1	4e-10	1	137	F8QN51.1
			VSeo_36e.289.289.2 File:"VSeo_36e.raw", NativeID:"controllerType=0 controllerNumber=1 scan=289"	PLA2	SALLSYSNYGCYCGWGGK	11,Carbamidomethyl[C];13,Carbamidomethyl[C];	2042.86	2	0	2042.87	-0.014247	10.3671	0.000344329	sp|P34180|PA2N2_VIPAA/	31,K,G/	0	ammodytin I2(A) isoform [Vipera aspis aspis]	Vipera aspis aspis	62.6	62.6	1	7e-13	1	68	CAE47206.1
			VSeo_36e.220.220.2 File:"VSeo_36e.raw", NativeID:"controllerType=0 controllerNumber=1 scan=220"	PLA2	HLSQFGDMINK		1289.62	2	0	1289.63	-0.008384	9.12456	0.000494969	sp|Q910A1|PA2A1_VIPAA/	16,G,K/	0	ammodytin I1(E) isoform [Vipera aspis aspis]	Vipera aspis aspis	40.1	40.1	1	2e-05	1	138	CAE47133.1
			VSeo_36e.199.199.3 File:"VSeo_36e.raw", NativeID:"controllerType=0 controllerNumber=1 scan=199"	PLA2	HLSQFGDMINKK		1417.71	3	0	1417.73	-0.012379	14.021	0.000618602	sp|Q910A1|PA2A1_VIPAA/	16,G,T/	1	ammodytin I1(A) variant [Vipera ammodytes ammodytes]	Vipera ammodytes ammodytes	30.8	30.8	1	0.034	1	132	CAE47176.1
			VSeo_36e.340.340.2 File:"VSeo_36e.raw", NativeID:"controllerType=0 controllerNumber=1 scan=340"	PLA2	NLYQFGNMIFK		1374.68	2	0	1374.69	-0.009382	8.09371	0.00225003	sp|P34180|PA2N2_VIPAA/	16,G,M/	0	ammodytin I2(B) variant [Vipera aspis atra]	Vipera aspis atra	41.8	41.8	1	5e-06	1	137	CAE47230.1
			VSeo_36e.313.313.2 File:"VSeo_36e.raw", NativeID:"controllerType=0 controllerNumber=1 scan=313"	PLA2	NLYQFGNMIFK	8,Oxidation[M];	1390.67	2	0	1390.68	-0.010889	5.81109	0.00253182	sp|P34180|PA2N2_VIPAA/	16,G,M/	0	ammodytin I2(B) variant [Vipera aspis atra]	Vipera aspis atra	41.8	41.8	1	5e-06	1	137	CAE47230.1
			VSeo_36e.274.274.2 File:"VSeo_36e.raw", NativeID:"controllerType=0 controllerNumber=1 scan=274"	PLA2	MGTYSYSFQNGDIVCGGDDPCLR	1,Oxidation[M];15,Carbamidomethyl[C];21,Carbamidomethyl[C];	2628.06	2	0	2628.08	-0.023396	7.3174	0.00269373	sp|F8QN52|PA2A1_VIPRE/sp|Q910A0|PA23_ECHCO/sp|Q910A1|PA2A1_VIPAA/	76,K,A/76,K,A/76,K,A/	0	ammodytin I1(B) isoform [Vipera ursinii]	Vipera ursinii	80	80	1	2e-18	1	138	CAE47156.1
			VSeo_36e.59.59.3 File:"VSeo_36e.raw", NativeID:"controllerType=0 controllerNumber=1 scan=59"	PLA2	GKPLDATDR		972.508	3	0	972.511	-0.002472	6.79423	0.00317351	sp|P24294|PA2A2_ERIMA/sp|F8QN52|PA2A1_VIPRE/sp|P00620|PA2A_BITGA/sp|P24293|PA2A1_ERIMA/sp|Q910A1|PA2A1_VIPAA/	33,K,C/49,K,C/31,K,C/33,K,C/49,K,C/	1	ammodytin I1(E) isoform [Vipera aspis aspis]	Vipera aspis aspis	30.8	30.8	1	0.027	1	138	CAE47133.1
			VSeo_36e.154.154.3 File:"VSeo_36e.raw", NativeID:"controllerType=0 controllerNumber=1 scan=154"	PLA2	HLSQFGDMINKK	8,Oxidation[M];	1433.71	3	0	1433.72	-0.011841	4.88846	0.0575505	sp|Q910A1|PA2A1_VIPAA/	16,G,T/	1	ammodytin I1(A) variant [Vipera ammodytes ammodytes]	Vipera ammodytes ammodytes	30.8	30.8	1	0.034	1	132	CAE47176.1
			VSeo_36e.278.278.2 File:"VSeo_36e.raw", NativeID:"controllerType=0 controllerNumber=1 scan=278"	PLA2	NLFQFGK		853.453	2	0	853.457	-0.003393	3.58352	0.0632039	sp|F8QN51|PA2A3_VIPRE/sp|P0CAS0|PA2A2_CERCE/	16,G,M/16,G,M/	0	RecName: Full=Acidic phospholipase A2 Vur-PL3; Short=svPLA2; AltName: Full=Phosphatidylcholine 2-acylhydrolase; Flags: Precursor [Vipera renardi]	Vipera renardi	26.1	26.1	1	0.85	1	137	F8QN51.1
			VSeo_36e.286.286.2 File:"VSeo_36e.raw", NativeID:"controllerType=0 controllerNumber=1 scan=286"	PLA2	MGTYSYSFQNGDIVCGGDDPCLR	15,Carbamidomethyl[C];21,Carbamidomethyl[C];	2612.06	2	0	2612.08	-0.027992	3.08778	0.0665819	sp|F8QN52|PA2A1_VIPRE/sp|Q910A0|PA23_ECHCO/sp|Q910A1|PA2A1_VIPAA/	76,K,A/76,K,A/76,K,A/	0	ammodytin I1(B) isoform [Vipera ursinii]	Vipera ursinii	80	80	1	2e-18	1	138	CAE47156.1
			VSeo_36e.178.178.2 File:"VSeo_36e.raw", NativeID:"controllerType=0 controllerNumber=1 scan=178"	PLA2	HLSQFGDMINK	8,Oxidation[M];	1305.62	2	0	1305.63	-0.009036	4.86752	0.169504	sp|Q910A1|PA2A1_VIPAA/	16,G,K/	0	ammodytin I1(E) isoform [Vipera aspis aspis]	Vipera aspis aspis	40.1	40.1	1	2e-05	1	138	CAE47133.1
			VSeo_36e.101.101.2 File:"VSeo_36e.raw", NativeID:"controllerType=0 controllerNumber=1 scan=101"	PLA2	NYPSSHCTETEQC	7,Carbamidomethyl[C];13,Carbamidomethyl[C];	1612.59	2	0	1612.6	-0.014076	1.82828	0.179235	sp|P34180|PA2N2_VIPAA/	124,K,-/	0	ammodytin I2(B) variant [Vipera aspis atra]	Vipera aspis atra	47.7	47.7	1	6e-08	1	137	CAE47230.1
			VSeo_36e.90.90.4 File:"VSeo_36e.raw", NativeID:"controllerType=0 controllerNumber=1 scan=90"	PLA2	NLYQFGEMISKK	1,Deamidated[N];8,Oxidation[M];	1474.74	4	0	1474.72	0.014337	3.04787	0.197445	sp|P24294|PA2A2_ERIMA/	0,-,T/	1	RecName: Full=Acidic phospholipase A2 PLA-2; Short=svPLA2; AltName: Full=Phosphatidylcholine 2-acylhydrolase [Eristicophis macmahoni]	Eristicophis macmahoni	43.5	43.5	1	2e-06	1	121	P24294.1
			VSeo_36e.43.43.2 File:"VSeo_36e.raw", NativeID:"controllerType=0 controllerNumber=1 scan=43"	PLA2	GKPQDATDR		987.479	2	0	987.485	-0.00685	1.96154	0.200206	sp|A8CG87|PA2A2_DABRR/sp|Q9PWR6|PA2A7_DABPA/sp|Q9YGJ7|PA2A8_DABPA/sp|C0HJC1|PA2_BOTLA/sp|B6CQR5|PA2A2_MACLB/sp|A8CG86|PA2A1_DABRR/sp|Q7T2R1|PA2AA_DABSI/sp|P31854|PA2B_VIPBB/sp|C3W4R6|PA2A1_MACLB/sp|P34180|PA2N2_VIPAA/sp|P81458|PA2B_DABRR/sp|A8CG90|PA2B2_DABRR/sp|B5U6Z2|PA2A_MACLN/sp|Q98996|PA2A_DABPA/sp|A8CG78|PA2A2_DABSI/sp|Q910A0|PA23_ECHCO/	49,K,C/49,K,C/48,K,C/33,R,C/49,K,C/49,Q,C/49,Q,C/49,Q,C/49,K,C/49,K,C/33,K,C/49,K,C/49,K,C/49,K,C/49,K,C/49,K,C/	1	acidic phospholipase A2 [Atheris nitschei]	Atheris nitschei	31.2	31.2	1	0.019	1	139	AJA90799.1
			VSeo_36e.74.74.2 File:"VSeo_36e.raw", NativeID:"controllerType=0 controllerNumber=1 scan=74"	PLA2	PLDATDR		787.391	2	0	787.394	-0.003139	0.921904	0.290026	sp|Q2YHJ4|PA2HB_TRIBO/sp|Q2YHJ8|PA2HB_TRIPE/sp|P24294|PA2A2_ERIMA/sp|P48650|PA2HS_ECHCA/sp|O57385|PA2H_DEIAC/sp|P80963|PA2H_BOTSC/sp|Q6EER4|PA2B_BOTSC/sp|P0DMH0|PA2A_BOTFO/sp|F8QN52|PA2A1_VIPRE/sp|P00620|PA2A_BITGA/sp|Q2YHJ9|PA2HA_TRIPE/sp|P0DMT2|PA2HS_ECHCS/sp|P24293|PA2A1_ERIMA/sp|Q910A1|PA2A1_VIPAA/	51,K,C/51,K,C/35,K,C/35,P,C/51,E,C/51,Q,C/51,Q,C/34,G,C/51,K,C/33,K,C/51,K,C/35,P,C/35,K,C/51,K,C/	0	RecName: Full=Basic phospholipase A2 homolog Tbo-K49; Short=svPLA2 homolog; Flags: Precursor [Trimeresurus borneensis]	Trimeresurus borneensis	25.2	25.2	1	1.6	1	138	Q2YHJ4.1
			VSeo_36e.166.166.3 File:"VSeo_36e.raw", NativeID:"controllerType=0 controllerNumber=1 scan=166"	PLA2	GHLSQFGDMINKK		1474.74	3	0	1474.75	-0.010769	0.927862	0.290986	sp|Q910A1|PA2A1_VIPAA/	15,E,T/	1	ammodytin I1(E) isoform [Vipera aspis aspis]	Vipera aspis aspis	45.6	45.6	1	3e-07	1	138	CAE47133.1
			VSeo_36e.48.48.2 File:"VSeo_36e.raw", NativeID:"controllerType=0 controllerNumber=1 scan=48"	PLA2	VNGCDPK	2,Deamidated[N];4,Carbamidomethyl[C];	790.334	2	0	790.34	-0.006403	1.82618	0.295648	sp|P20476|PA2A1_TRIGA/sp|Q9PWR6|PA2A7_DABPA/sp|P81479|PA2A4_TRIGA/sp|Q9YGJ7|PA2A8_DABPA/sp|B6CQR5|PA2A2_MACLB/sp|P81480|PA2A3_TRIGA/sp|Q6H3C8|PA2AF_TRIST/sp|Q6H3D0|PA2AA_TRIST/sp|C3W4R6|PA2A1_MACLB/sp|P34180|PA2N2_VIPAA/sp|F8QN52|PA2A1_VIPRE/sp|Q2YHJ5|PA2AB_TRIPE/sp|B5U6Z2|PA2A_MACLN/sp|Q98996|PA2A_DABPA/sp|Q910A0|PA23_ECHCO/sp|F8QN53|PA2A2_VIPRE/sp|P70088|PA2A6_TRIGA/sp|Q910A1|PA2A1_VIPAA/	69,K,K/69,T,L/53,K,K/68,T,L/69,S,L/53,K,K/69,K,D/69,K,K/69,S,L/69,R,L/69,R,M/53,K,D/69,T,L/69,T,L/69,R,M/69,R,L/69,K,D/69,R,M/	0	RecName: Full=Acidic phospholipase A2 VpaPLA2; Short=svPLA2; AltName: Full=Phosphatidylcholine 2-acylhydrolase; Flags: Precursor [Daboia palaestinae]	Daboia palaestinae	26.1	26.1	1	0.8	1	138	Q98996.1
			VSeo_36e.50.50.2 File:"VSeo_36e.raw", NativeID:"controllerType=0 controllerNumber=1 scan=50"	PLA2	AVCECDR	3,Carbamidomethyl[C];5,Carbamidomethyl[C];	909.352	2	0	909.355	-0.003301	1.01466	0.31419	sp|P0CAR9|PA2A1_CERCE/sp|Q90ZZ9|PA21_ECHCO/sp|A8CG87|PA2A2_DABRR/sp|P04084|PA2HA_VIPAE/sp|Q9PWR6|PA2A7_DABPA/sp|Q9YGJ7|PA2A8_DABPA/sp|P21789|PA2A_CERCE/sp|B6CQR5|PA2A2_MACLB/sp|A4VBF0|PA2H_VIPBN/sp|Q10754|PA2H_VIPAZ/sp|Q8JFG1|PA2H_VIPAP/sp|P0DKR3|PA2AA_PSEFE/sp|Q7T3T5|PA2AB_DABSI/sp|P59170|PA2A4_ECHCS/sp|C3W4R6|PA2A1_MACLB/sp|P34180|PA2N2_VIPAA/sp|P81458|PA2B_DABRR/sp|Q7T3S7|PA2A1_ECHCA/sp|A8CG90…	98,R,V/99,K,E/99,R,V/83,R,A/99,R,V/98,R,V/83,R,V/99,R,V/99,R,A/99,R,A/99,R,A/83,R,A/91,R,V/99,K,E/99,R,V/99,R,V/83,R,V/99,R,E/99,R,V/99,R,V/99,R,V/99,R,V/99,R,V/99,R,V/99,R,V/99,R,V/99,K,E/83,R,V/99,R,V/99,R,V/	0	acidic phospholipase A2 [Echis carinatus]	Echis carinatus	27.4	27.4	1	0.28	1	139	AJA90797.1
			VSeo_36e.181.181.2 File:"VSeo_36e.raw", NativeID:"controllerType=0 controllerNumber=1 scan=181"	PLA2	YGRANGCDPK	5,Deamidated[N];7,Carbamidomethyl[C];	1138.49	2	0.30478	1138.49	-0.000591	0.001	0.849069	sp|P31854|PA2B_VIPBB/sp|P0DPS4|PA2B_CERCE/	66,C,L/50,C,L/	1	RecName: Full=Basic phospholipase A2 Pla2Vb; Short=VbbPLA2; Short=svPLA2; AltName: Full=Phosphatidylcholine 2-acylhydrolase; Flags: Precursor [Vipera berus berus]	Vipera berus berus	35.8	35.8	1	0.0006	1	138	P31854.2
			VSeo_36e.93.93.2 File:"VSeo_36e.raw", NativeID:"controllerType=0 controllerNumber=1 scan=93"	PLA2	CFVHDCCYGR	6,Carbamidomethyl[C];7,Carbamidomethyl[C];	1316.48	2	0.30478	1316.5	-0.019149	0.001	0.859794	sp|A8CG87|PA2A2_DABRR/sp|P14421|PA2N_GLOHA/sp|P21789|PA2A_CERCE/sp|Q1RP79|PA2B1_VIPBN/sp|P24294|PA2A2_ERIMA/sp|P14420|PA2B_VIPAE/sp|Q10755|PA2B_VIPAZ/sp|P31854|PA2B_VIPBB/sp|P0DKR3|PA2AA_PSEFE/sp|F8QN51|PA2A3_VIPRE/sp|P34180|PA2N2_VIPAA/sp|P0DPS4|PA2B_CERCE/sp|Q8JFG0|PA2B_VIPAP/sp|Q1RP78|PA2B2_VIPBN/sp|F8QN52|PA2A1_VIPRE/sp|A8CG78|PA2A2_DABSI/sp|Q910A0|PA23_ECHCO/sp|F8QN53|PA2A2_VIPRE/sp|P24293|P…	59,C,V/43,C,L/43,C,V/59,C,V/43,C,V/43,C,V/43,C,V/59,C,A/43,C,V/59,C,V/59,C,V/43,C,A/59,C,V/59,C,V/59,C,V/59,C,V/59,C,V/59,C,V/43,C,V/43,C,V/59,C,V/	0	PLA2(IIA)-Aze2 [Azemiops feae]	Azemiops feae	40.1	40.1	1	2e-05	1	151	ABU68548.1
[truncated: 1,867 more rows]

## Sheet: Table S3
			Supplementary Table S3. Final binary matrix of the 10 polymorphic bands considered for statistical testing. The approximate molecular mass of every band is reported above each band column. The total number of polymorphic bands of each SDS-PAGE profile is reported in the column "Total polymorphic bands". The column "Total bands" reports the total number of bands (polymorphic + fixed) retrieved fro…
[truncated: 52 more rows]

[truncated: 3 more sheets: Table S4, Table S5, Table S6]
